# Supplementary material for: Increased fitness of a key appendicularian zooplankton species under warmer, acidified seawater conditions
Source: PLoS One. 2018 Jan 3;13(1):e0190625. doi: 10.1371/journal.pone.0190625 (PMC5752025; doi:10.1371/journal.pone.0190625)
Supplement: S1 Data — (XLS) [file pone.0190625.s008.xls]

## Sheet: Seawater Parameters
M.= Mesocosm
TL= Temperature low, ambient fjord temperature
TH= targeted temperature +3C relative to TL
PA= Ambient pH
PL= low pH
												Total alkalinity (measured), micromol per kilogram seawater (CO2calc input)	Partial pressure of CO2 in seawater (calculated). Product of mole fraction of CO2 in wet air and the total pressure in microatmospheres (CO2calc output)	Concentration of bicarbonate ion micromol per kilogram seawater (CO2calc output)	Concentration of carbonate ion, micromol per kilogram seawater (CO2calc output)	Omega calcite, calcite saturation state. no units (CO2calc output)	Omega aragonite, aragonite saturation state. no units (CO2calc output)
Time (Days)	Treatment	Temperature	pH	Replicate	Nutrients	Appendicularians	Sampling	Temperature ( C )	Salinity (ppt)	pH(NBS)	pH(total scale)	Alkalinity umol/kgSW	pCO2 (uatm)	HCO3- (umol/kgSW)	CO3-- (umol/kgSW)	Omega Ca	Omega Ar			Temperature	pH	Replicate	day -- >	0	1	1.45833	2	2.375	3	3.375	4	4.41667	5	5.375	6	6.41667	7	7.41667	8	8.41667	9	9.375	10	10.4167	11	11.375	12	12.375	13
0	M1A	TL	PA	1	-	-	top	10.4	29.7	8.15	8.20373	2.10066	250.768	1724.97	151.376	3.71729	2.3365		Temperature	TL	PA	1	M1A	10.4	11.4	13	11.4	13.1	11.2	11.1	10.7	12.7	11.2	11.95	11.7	11.9	11.4	12.5	11.5	12.8	11.9	12.4	11.7	13.7	11.7	12.95	11.8	13.05	11.55
0	M1B	TL	PA	2	-	-	top	10.4	29.8	8.15	8.20398	2.29065	273.847	1885.49	165.937	4.07266	2.56069		Temperature	TL	PA	2	M1B	10.4	11.2	12.9	11.3	13	11.1	11	10.7	12.65	11.1	11.85	11.6	11.8	11.35	12.45	11.4	12.7	11.8	12.4	11.6	13.6	11.6	12.85	11.8	12.95	11.5
0	M2A	TL	PA	1	+	-	top	10.4	29.8	8.16	8.20753	2.0611	243.137	1687.81	149.76	3.67562	2.31105		Temperature	TL	PA	1	M2A	10.4	11.3	12.9	11.3	13	11.1	11	10.7	12.7	11.2	11.95	11.6	11.9	11.4	12.5	11.45	12.8	11.8	12.4	11.6	13.6	11.65	12.9	11.85	12.95	11.5
0	M2B	TL	PA	2	+	-	top	10.5	29.8	8.16	8.20602	2.15738	255.986	1769.5	157.062	3.85505	2.42429		Temperature	TL	PA	2	M2B	10.45	11.3	13	11.3	13.1	11	11	10.7	12.65	11.2	11.95	11.6	11.9	11.4	12.5	11.5	12.8	11.8	12.4	11.6	13.6	11.65	12.9	11.8	12.9	11.5
0	M3A	TL	PL	1	+	-	top	10.4	29.7	8.16	8.20729	2.11379	249.969	1733.61	153.384	3.7666	2.3675		Temperature	TL	PL	1	M3A	10.4	11.25	12.8	11.2	12.9	11.2	11.1	10.6	12.6	11.05	11.8	11.45	11.8	11.4	12.45	11.4	12.8	11.7	12.2	11.5	13.4	11.4	12.75	11.6	12.85	11.4
0	M3B	TL	PL	2	+	-	top	10.4	29.8	8.16	8.20575	2.2093	262.532	1815	160.388	3.93647	2.47506		Temperature	TL	PL	2	M3B	10.4	11.2	12.8	11.2	13	11.2	11.1	10.6	12.6	10.9	11.7	11.45	11.85	11.4	12.5	11.4	12.8	11.7	12.25	11.5	13.4	11.4	12.8	11.6	12.8	11.4
0	M4A	TH	PL	1	+	-	top	10.6	30	8.16	8.20498	2.05669	243.882	1681.85	150.191	3.6826	2.31771		Temperature	TH	PL	1	M4A	10.55	12.5	14.9	13.8	15.5	13.7	13.5	13.2	15.3	13.8	14.55	14.3	14.6	14.15	15.1	14.2	15.4	14.5	15	14.3	16	14.2	15.4	14.4	15.35	14
0	M4B	TH	PL	2	+	-	top	10.6	29.7	8.16	8.20426	2.18772	261.202	1796.27	159.036	3.90585	2.45588		Temperature	TH	PL	2	M4B	10.6	12.5	14.8	13.8	15.5	13.7	13.5	13.2	15.2	13.8	14.55	14.3	14.6	14.1	15.1	14.2	15.4	14.5	15	14.3	16	14.2	15.4	14.4	15.4	13.9
0	M5A	TL	PA	1	+	+	top	10.4	29.7	8.16	8.20729	2.21791	262.725	1822.08	161.212	3.95882	2.48832		Temperature	TL	PA	1	M5A	10.4	11.4	13.1	11.45	13.2	11.4	11.2	10.7	12.8	11.1	11.9	11.7	12.1	11.55	12.7	11.6	13	11.9	12.5	11.7	13.7	11.65	13.05	11.8	13	11.6
0	M5B	TL	PA	2	+	+	top	10.4	29.7	8.16	8.21262	2.10066	244.786	1718.64	153.938	3.78021	2.37605		Temperature	TL	PA	2	M5B	10.4	11.2	12.7	11.1	12.8	11.05	11	10.6	12.6	11	11.75	11.4	11.8	11.4	12.4	11.3	12.8	11.7	12.2	11.5	13.4	11.4	12.75	11.65	12.8	11.4
0	M6A	TL	PL	1	+	+	top	10.5	29.7	8.15	8.20222	2.20499	264.776	1813.65	159.213	3.90995	2.45803		Temperature	TL	PL	1	M6A	10.5	11.3	13	11.3	13	11.2	11.1	10.7	12.65	11.1	11.9	11.6	12	11.5	12.6	11.5	13	11.8	12.4	11.6	13.6	11.6	12.9	11.8	12.9	11.4
0	M6B	TL	PL	2	+	+	top	10.5	29.7	8.16	8.20755	2.0655	243.896	1691.27	150.302	3.69113	2.32047		Temperature	TL	PL	2	M6B	10.5	11.4	13	11.25	13	11.3	11.2	10.7	12.7	11.15	11.9	11.6	12	11.5	12.55	11.5	12.95	11.8	12.35	11.6	13.55	11.6	12.9	11.8	12.9	11.5
0	M7A	TH	PL	1	+	+	top	10.5	29.7	8.15	8.19867	2.23081	270.574	1838.26	160.058	3.93071	2.47108		Temperature	TH	PL	1	M7A	10.5	12.4	14.7	13.7	15.4	13.6	13.5	13.3	15.2	13.65	14.4	14.3	14.55	14.15	15.15	14.1	15.4	14.4	14.9	14.3	15.95	14	15.3	14.3	15.3	13.95
0	M7B	TH	PL	2	+	+	top	10.4	29.7	8.15	8.20018	2.12253	255.928	1746.12	151.982	3.73217	2.34586		Temperature	TH	PL	2	M7B	10.45	12.5	14.8	13.8	15.5	13.7	13.55	13.3	15.3	13.7	14.45	14.3	14.6	14.1	15.1	14.2	15.5	14.45	15	14.4	16.1	14.1	15.4	14.35	15.4	14
0	M1A	TL	PA	1	-	-	bottom	10.4	29.8	8.15	8.20398	2.10066	250.382	1723.93	151.719	3.72369	2.34128
0	M1B	TL	PA	2	-	-	bottom	10.4	30	8.16	8.20446	2.29065	273.013	1883.26	166.695	4.08682	2.57121
0	M2A	TL	PA	1	+	-	bottom	10.4	30	8.16	8.20446	2.0611	244.74	1688.23	149.432	3.66359	2.30494
0	M2B	TL	PA	2	+	-	bottom	10.4	30.1	8.16	8.20648	2.15738	254.97	1767.66	157.556	3.86067	2.42968			Temperature	pH	Replicate	day -- >	0	1	1.45833	2	2.375	3	3.375	4	4.41667	5	5.375	6	6.41667	7	7.41667	8	8.41667	9	9.375	10	10.4167	11	11.375	12	12.375	13
0	M3A	TL	PL	1	+	-	bottom	10.4	30.1	8.16	8.20826	2.11379	248.431	1729.39	154.777	3.79257	2.38682		Salinity	TL	PA	1	M1A	29.75	29.95	29.9	29.85	30.15	29.65	29.6	29.5	29.55	29.55	29.45	29.15	29.15	29.15	29	29.15	28.9	29.05	29.1	29	29.5	29.5	29.6	29.45	29.5	29.55
0	M3B	TL	PL	2	+	-	bottom	10.4	30	8.16	8.20802	2.2093	260.468	1811.49	161.66	3.96339	2.49355		Salinity	TL	PA	2	M1B	29.9	30	30.25	29.95	30.1	29.7	29.5	29.45	29.45	29.35	29.45	29.2	29.35	28.95	29.2	29	29	29.2	29.15	29.2	29.5	29.5	29.6	29.5	29.45	29.55
0	M4A	TH	PL	1	+	-	bottom	10.5	30	8.16	8.2065	2.05669	242.863	1681.92	150.147	3.68132	2.31649		Salinity	TL	PA	1	M2A	29.9	30	29.9	30.05	30.05	29.7	29.55	29.4	29.25	29.5	29.45	29.4	29.35	29.1	29.2	29.1	29.05	29.2	29	29.1	29.55	29.55	29.45	29.4	29.55	29.55
0	M4B	TH	PL	2	+	-	bottom	10.6	30	8.16	8.20676	2.18772	258.751	1791.71	160.657	3.93921	2.47921		Salinity	TL	PA	2	M2B	29.95	30.05	29.9	30.1	30.1	29.7	29.45	29.4	29.35	29.6	29.45	29.3	29.3	29.05	29.15	29.15	28.9	29.2	29	29.2	29.55	29.55	29.35	29.4	29.5	29.45
0	M5A	TL	PA	1	+	+	bottom	10.4	30.1	8.16	8.21004	2.21791	259.859	1816.36	163.228	3.99964	2.51714		Salinity	TL	PL	1	M3A	29.9	29.95	29.85	30	30.05	29.8	29.55	29.45	29.4	29.5	29.25	29.25	29.4	29.15	29.2	29.2	29.05	29.05	29.1	29.15	29.55	29.55	29.35	29.55	29.55	29.35
0	M5B	TL	PA	2	+	+	bottom	10.4	30.1	8.16	8.21182	2.10066	244.453	1715.69	154.813	3.79345	2.38737		Salinity	TL	PL	2	M3B	29.9	30	30.15	30	30.05	29.55	29.55	29.3	29.35	29.5	29.5	29.4	29.4	29	29.2	29.1	29.25	29.05	29.05	29.3	29.5	29.5	29.45	29.55	29.55	29.45
0	M6A	TL	PL	1	+	+	bottom	10.5	29.9	8.15	8.2027	2.20499	263.967	1811.49	159.937	3.92348	2.4681		Salinity	TH	PL	1	M4A	30	30	30	29.9	30.1	29.7	29.6	29.55	29.6	29.8	29.5	29.5	29.25	29.1	29.3	29.3	29.1	29.35	29.25	29.35	29.7	29.7	29.7	29.85	29.95	29.7
0	M6B	TL	PL	2	+	+	bottom	10.5	29.9	8.16	8.20803	2.0655	243.143	1689.19	150.98	3.70376	2.32989		Salinity	TH	PL	2	M4B	29.85	30.1	29.95	29.9	30.1	29.85	29.45	29.4	29.6	29.5	29.55	29.65	29.4	29.25	29.2	29.3	29.05	29.35	29.3	29.55	29.65	29.65	29.75	29.65	29.75	29.7
0	M7A	TH	PL	1	+	+	bottom	10.5	29.9	8.15	8.19915	2.23081	269.751	1836.09	160.788	3.94436	2.48124		Salinity	TL	PA	1	M5A	29.9	30.1	29.95	29.95	29.95	29.55	29.65	29.45	29.45	29.45	29.55	29.55	29.35	29	29.1	29.1	29	28.95	29.1	29.1	29.55	29.55	29.35	29.6	29.5	29.4
0	M7B	TH	PL	2	+	+	bottom	10.5	30	8.15	8.19939	2.12253	255.821	1742.9	153.065	3.75287	2.36152		Salinity	TL	PA	2	M5B	29.9	30.1	29.9	30.1	30.05	29.65	29.5	29.4	29.45	29.55	29.55	29.45	29.35	29	29.25	29	28.95	29.1	29.1	29.2	29.45	29.45	29.4	29.55	29.6	29.7
1	M1A	TL	PA	1	-	-	top	11.4	29.8	8.123	8.17116	2.10504	274.459	1739.38	147.464	3.62148	2.28109		Salinity	TL	PL	1	M6A	29.8	29.95	30.05	29.9	29.9	29.45	29.4	29.25	29.4	29.55	29.35	29.45	29.3	29	29.15	29.05	29.1	29.1	29.05	29.25	29.5	29.5	29.45	29.55	29.5	29.6
1	M1B	TL	PA	2	-	-	top	11.2	29.9	8.121	8.16908	2.15738	282.809	1787.02	149.979	3.68073	2.31829		Salinity	TL	PL	2	M6B	29.8	30.05	29.9	29.9	29.95	29.45	29.4	29.4	29.5	29.55	29.65	29.4	29.3	28.85	29.2	29	29.2	29.25	29.1	29.15	29.5	29.5	29.5	29.5	29.55	29.6
1	M2A	TL	PA	1	+	-	top	11.3	29.8	8.133	8.18329	2.23081	282.007	1839.18	159.732	3.92251	2.47024		Salinity	TH	PL	1	M7A	29.8	30.05	30.05	29.95	30.1	29.75	29.5	29.5	29.6	29.7	29.7	29.4	29.35	29.25	29.45	29.25	29.2	29.35	29.15	29.3	29.6	29.6	29.7	29.75	29.8	29.7
1	M2B	TL	PA	2	+	-	top	11.3	29.8	8.133	8.17443	2.15303	278.439	1779.24	151.405	3.71804	2.34148		Salinity	TH	PL	2	M7B	29.85	30.15	30.3	30.3	30.2	29.7	29.6	29.35	29.55	29.75	29.85	29.5	29.15	29.25	29.2	29.35	29.35	29.45	29.3	29.3	29.55	29.55	29.7	29.8	29.75	29.8
1	M3A	TL	PL	1	+	-	top	11.3	29.7	8.123	7.84108	2.1269	653.574	1937.71	76.3573	1.87613	1.18114
1	M3B	TL	PL	2	+	-	top	11.2	29.8	8.127	7.82498	2.17906	696.715	1992.64	75.5491	1.85513	1.16807
1	M4A	TH	PL	1	+	-	top	12.5	29.8	8.134	7.71713	2.16313	908.918	2009.06	62.4346	1.53456	0.96858
1	M4B	TH	PL	2	+	-	top	12.5	30.1	8.129	7.76901	2.21354	816.835	2036.86	71.82	1.76222	1.11332			Temperature	pH	Replicate	day -- >	0	1	1.45833	2	2.375	3	3.375	4	4.41667	5	5.375	6	6.41667	7	7.41667	8	8.41667	9	9.375	10	10.4167	11	11.375	12	12.375	13
1	M5A	TL	PA	1	+	+	top	11.4	30	8.124	8.15392	2.10066	286.403	1745.77	142.902	3.50556	2.20946		pH total scale	TL	PA	1	M1A	8.20385	8.1724	8.17681	8.18587	8.1585	8.16672	8.17498	8.17498	8.14812	8.15584	8.17376	8.17662	8.17374	8.16855	8.15508	8.16976	8.13823	8.15141	8.14526	8.12769	8.1145	8.14705	8.12722	8.13234	8.11511	8.13323
1	M5B	TL	PA	2	+	+	top	11.2	30	8.126	8.16755	2.24368	295.472	1861.15	156.009	3.8266	2.41092		pH total scale	TL	PA	2	M1B	8.20422	8.17021	8.17275	8.18032	8.1535	8.16192	8.16805	8.16805	8.13883	8.1469	8.16547	8.16844	8.16592	8.15994	8.14566	8.15668	8.12754	8.14081	8.13391	8.11768	8.10702	8.1413	8.12325	8.13246	8.11278	8.13212
1	M6A	TL	PL	1	+	+	top	11.3	29.9	8.106	7.77246	2.22651	811.44	2055.67	69.4842	1.70537	1.07431		pH total scale	TL	PA	1	M2A	8.206	8.18465	8.19572	8.18676	8.1569	8.16369	8.16196	8.16196	8.12892	8.13357	8.16845	8.17334	8.1689	8.16577	8.1626	8.16682	8.13593	8.15053	8.12121	8.1055	8.07638	8.09563	8.07027	8.07055	8.04695	8.0551
1	M6B	TL	PL	2	+	+	top	11.4	29.9	8.117	7.77995	2.17906	779.608	2007.95	69.3167	1.70137	1.07199		pH total scale	TL	PA	2	M2B	8.20625	8.17592	8.18562	8.20372	8.16366	8.19602	8.15285	8.15285	8.10509	8.14178	8.15607	8.16071	8.15641	8.17894	8.16336	8.16799	8.14528	8.16026	8.1415	8.12571	8.09395	8.11155	8.08678	8.08623	8.06158	8.06814
1	M7A	TH	PL	1	+	+	top	12.4	29.9	8.129	7.73989	2.28434	907.152	2115.3	69.1678	1.69895	1.07247		pH total scale	TL	PL	1	M3A	8.20777	7.84237	7.74568	7.79356	7.83311	7.80726	7.73779	7.73779	7.72133	7.78258	7.77835	7.78289	7.77868	7.75585	7.73272	7.75065	7.73759	7.75174	7.75777	7.74335	7.73687	7.79868	7.8102	7.8237	7.7936	7.79732
1	M7B	TH	PL	2	+	+	top	12.5	30.1	8.126	7.63668	2.27605	1163.83	2139.86	55.6338	1.36506	0.862407		pH total scale	TL	PL	2	M3B	8.20689	7.82546	7.77282	7.77141	7.79759	7.78451	7.76882	7.76882	7.77149	7.74527	7.77406	7.77704	7.77184	7.77941	7.77531	7.76193	7.75655	7.77032	7.78174	7.76786	7.77369	7.7959	7.80102	7.80246	7.7986	7.7887
1	M1A	TL	PA	1	-	-	bottom	11.4	30.1	8.123	8.17365	2.10066	271.327	1731.36	148.648	3.6445	2.29773		pH total scale	TH	PL	1	M4A	8.20574	7.7176	7.77474	7.86091	7.82834	7.75094	7.71518	7.71518	7.71774	7.73773	7.84153	7.84479	7.84028	7.72571	7.76739	7.70184	7.73688	7.74896	7.74145	7.72966	7.76772	7.76813	7.76088	7.76872	7.76552	7.75823
1	M1B	TL	PA	2	-	-	bottom	11.2	30.1	8.121	8.17133	2.29065	298.543	1897.66	160.831	3.94271	2.48484		pH total scale	TH	PL	2	M4B	8.20551	7.76901	7.76702	7.7283	7.75064	7.74425	7.68143	7.68143	7.73983	7.6949	7.71813	7.72152	7.71713	7.7451	7.76891	7.75358	7.76647	7.77875	7.73719	7.72519	7.75802	7.73732	7.77496	7.77265	7.77059	7.76205
1	M2A	TL	PA	1	+	-	bottom	11.3	30.2	8.133	8.18602	2.0611	257.015	1689.28	149.002	3.65092	2.30207		pH total scale	TL	PA	1	M5A	8.20866	8.15505	8.16947	8.16599	8.13475	8.14088	8.13659	8.13659	8.10255	8.14182	8.17736	8.18021	8.17398	8.15365	8.14716	8.14697	8.1268	8.14233	8.11208	8.09618	8.06366	8.08766	8.06458	8.06636	8.04619	8.04902
1	M2B	TL	PA	2	+	-	bottom	11.3	30.3	8.133	8.1774	2.15738	275.599	1776.48	153.969	3.77052	2.3782		pH total scale	TL	PA	2	M5B	8.21222	8.16779	8.17186	8.1088	8.14096	8.13407	8.15563	8.15563	8.13153	8.13979	8.18395	8.18874	8.18272	8.21247	8.20651	8.20507	8.18064	8.19685	8.16225	8.1459	8.10513	8.12346	8.09943	8.09386	8.07192	8.07358
1	M3A	TL	PL	1	+	-	bottom	11.2	30.2	8.123	7.84367	2.11379	643.017	1922.77	76.8088	1.88189	1.1864		pH total scale	TL	PL	1	M6A	8.20246	7.77346	7.8108	7.76647	7.88971	7.85163	7.7924	7.7924	7.75163	7.72893	7.75961	7.7637	7.75817	7.7604	7.76331	7.82957	7.77829	7.7939	7.77096	7.75649	7.77746	7.82093	7.85355	7.82924	7.75852	7.76603
1	M3B	TL	PL	2	+	-	bottom	11.2	30.2	8.127	7.82594	2.2093	703.131	2018.44	77.4061	1.89652	1.19562		pH total scale	TL	PL	2	M6B	8.20779	7.78031	7.76818	7.78743	7.79384	7.79287	7.74427	7.74427	7.73895	7.76204	7.78419	7.78748	7.78204	7.79723	7.80112	7.82149	7.76595	7.78099	7.78585	7.7712	7.76839	7.79881	7.79905	7.8017	7.78947	7.80113
1	M4A	TH	PL	1	+	-	bottom	12.5	30.2	8.134	7.71807	2.05669	859.602	1907.01	59.9375	1.46982	0.928874		pH total scale	TH	PL	1	M7A	8.19891	7.74024	7.76839	7.83321	7.79981	7.76889	7.71319	7.71319	7.74071	7.73042	7.75981	7.76041	7.75708	7.76727	7.76532	7.77318	7.77029	7.78355	7.77488	7.76233	7.78117	7.78959	7.79264	7.78634	7.77976	7.76321
1	M4B	TH	PL	2	+	-	bottom	12.5	30.1	8.129	7.76901	2.18772	807.16	2012.74	70.9694	1.74135	1.10013		pH total scale	TH	PL	2	M7B	8.19979	7.63591	7.72493	7.7863	7.77007	7.74654	7.72253	7.72253	7.7351	7.74929	7.77791	7.77904	7.77438	7.74686	7.75143	7.76246	7.75274	7.76647	7.76255	7.74897	7.76272	7.78039	7.78882	7.76657	7.77059	7.76109
1	M5A	TL	PA	1	+	+	bottom	11.4	30.2	8.124	8.15617	2.21791	300.602	1843.2	152.361	3.73344	2.35453
1	M5B	TL	PA	2	+	+	bottom	11.2	30.2	8.126	8.16803	2.10066	275.197	1736.65	146.406	3.58709	2.26141
1	M6A	TL	PL	1	+	+	bottom	11.3	30	8.106	7.77447	2.20499	799.015	2034.35	69.2417	1.69848	1.07031
1	M6B	TL	PL	2	+	+	bottom	11.4	30.2	8.117	7.78067	2.0655	735.736	1900.21	66.1607	1.6212	1.02242			Temperature	pH	Replicate	day -- >	0	1	1.45833	2	2.375	3	3.375	4	4.41667	5	5.375	6	6.41667	7	7.41667	8	8.41667	9	9.375	10	10.4167	11	11.375	12	12.375	13
1	M7A	TH	PL	1	+	+	bottom	12.4	30.2	8.129	7.74059	2.23081	882.528	2063.54	68.0506	1.66865	1.05432		pH NBS	TL	PA	1	M1A	8.15	8.123	8.132	8.135	8.13	8.117	8.1095	8.1175	8.112	8.105	8.098	8.111	8.115	8.1225	8.1035	8.101	8.1055	8.089	8.0825	8.089	8.089	8.0395	8.0525	8.043	8.04	8.0335
1	M7B	TH	PL	2	+	+	bottom	12.5	30.2	8.126	7.63515	2.12253	1087.93	1994.02	51.7783	1.26974	0.802427		pH NBS	TL	PA	2	M1B	8.155	8.121	8.129	8.129	8.1235	8.1115	8.1035	8.1085	8.102	8.065	8.0885	8.1015	8.11	8.11	8.094	8.092	8.0925	8.0765	8.0695	8.0795	8.077	8.0305	8.046	8.04	8.039	8.031
1.45833	M1A	TL	PA	1	-	-	top	13	29.7	8.13	8.17634	2.10504	271.102	1718.35	156.312	3.84577	2.42896		pH NBS	TL	PA	1	M2A	8.16	8.133	8.144	8.153	8.1295	8.1145	8.1105	8.1025	8.089	8.086	8.077	8.1065	8.115	8.1115	8.1005	8.109	8.102	8.0855	8.0625	8.0675	8.051	7.9995	8	7.9875	7.9765	7.964
1.45833	M1B	TL	PA	2	-	-	top	12.9	30.2	8.129	8.17351	2.15738	278.999	1761.44	160.408	3.93485	2.48862		pH NBS	TL	PA	2	M2B	8.16	8.133	8.1355	8.1435	8.147	8.1235	8.1365	8.094	8.094	8.062	8.0845	8.093	8.1035	8.1245	8.1145	8.111	8.104	8.096	8.079	8.088	8.0685	8.0175	8.0165	8.004	7.9915	7.9785
1.45833	M2A	TL	PA	1	+	-	top	12.9	29.8	8.143	8.19548	2.23081	272.995	1810.27	171.834	4.22486	2.66872		pH NBS	TL	PL	1	M3A	8.16	8.123	7.801	7.7025	7.7345	7.7895	7.7505	7.6785	7.676	7.677	7.723	7.7125	7.739	7.74	7.6885	7.6755	7.6825	7.685	7.691	7.6985	7.695	7.653	7.6945	7.721	7.7235	7.7055
1.45833	M2B	TL	PA	2	+	-	top	13	29.8	8.135	8.18538	2.15303	270.51	1751.32	163.033	4.00882	2.53274		pH NBS	TL	PL	2	M3B	8.16	8.127	7.784	7.728	7.713	7.7555	7.7275	7.711	7.721	7.727	7.685	7.7065	7.704	7.6985	7.7115	7.7195	7.6935	7.703	7.6995	7.7235	7.7155	7.6905	7.6925	7.7125	7.7015	7.71
1.45833	M3A	TL	PL	1	+	-	top	12.8	29.8	7.801	7.74556	2.1269	833.922	1963.81	65.9022	1.62019	1.02322		pH NBS	TH	PL	1	M4A	8.16	8.134	7.6905	7.7495	7.8265	7.8095	7.7155	7.6785	7.705	7.6975	7.704	7.805	7.7185	7.684	7.687	7.7385	7.6635	7.7115	7.706	7.712	7.701	7.7105	7.692	7.6965	7.6945	7.7005
1.45833	M3B	TL	PL	2	+	-	top	12.8	30.2	7.784	7.77294	2.17906	796.606	2000.97	72.174	1.7703	1.11942		pH NBS	TH	PL	2	M4B	8.16	8.129	7.7415	7.742	7.6925	7.731	7.7085	7.646	7.664	7.719	7.667	7.6835	7.6945	7.703	7.706	7.741	7.7155	7.742	7.691	7.708	7.6935	7.6995	7.662	7.7115	7.698	7.7065
1.45833	M4A	TH	PL	1	+	-	top	14.9	29.7	7.691	7.77407	2.16313	797.262	1975.17	76.4407	1.88429	1.19474		pH NBS	TL	PA	1	M5A	8.16	8.124	8.116	8.1295	8.111	8.095	8.0875	8.079	8.069	8.0605	8.084	8.114	8.119	8.1035	8.09	8.095	8.0845	8.0795	8.0605	8.0595	8.039	7.9875	7.9915	7.983	7.971	7.963
1.45833	M4B	TH	PL	2	+	-	top	14.8	29.7	7.741	7.76646	2.21354	831.514	2025.63	76.7434	1.89154	1.19908		pH NBS	TL	PA	2	M5B	8.16	8.126	8.1265	8.128	8.049	8.0975	8.0755	8.0965	8.093	8.0875	8.0805	8.1195	8.1275	8.1605	8.149	8.152	8.1395	8.131	8.1115	8.1065	8.0815	8.0275	8.0245	8.015	7.9975	7.988
1.45833	M5A	TL	PA	1	+	+	top	13.1	29.8	8.115	8.16825	2.10066	276.311	1718.45	154.367	3.79606	2.3988		pH NBS	TL	PL	1	M6A	8.15	8.106	7.7325	7.7675	7.709	7.8485	7.7945	7.779	7.843	7.707	7.6715	7.6945	7.751	7.805	7.6905	7.707	7.763	7.7285	7.7525	7.714	7.707	7.6955	7.7205	7.766	7.7305	7.67
1.45833	M5B	TL	PA	2	+	+	top	12.7	29.7	8.126	8.17139	2.24368	293.494	1843.08	163.885	4.03103	2.54448		pH NBS	TL	PL	2	M6B	8.16	8.117	7.74	7.726	7.729	7.7525	7.737	7.6775	7.699	7.695	7.703	7.7185	7.7515	7.728	7.7315	7.7455	7.7555	7.715	7.718	7.73	7.7195	7.6865	7.697	7.711	7.703	7.7015
1.45833	M6A	TL	PL	1	+	+	top	13	29.8	7.732	7.81022	2.22651	744.231	2031.08	79.7027	1.95981	1.23819		pH NBS	TH	PL	1	M7A	8.15	8.129	7.711	7.742	7.797	7.7795	7.7335	7.6775	7.721	7.7145	7.694	7.721	7.724	7.724	7.728	7.737	7.7345	7.7455	7.725	7.7455	7.7315	7.7215	7.7115	7.728	7.711	7.7155
1.45833	M6B	TL	PL	2	+	+	top	13	29.7	7.74	7.76772	2.17906	810.101	2003.96	71.1447	1.75038	1.10553		pH NBS	TH	PL	2	M7B	8.15	8.126	7.608	7.698	7.7505	7.7515	7.712	7.687	7.712	7.7165	7.715	7.74	7.7425	7.7135	7.7075	7.724	7.725	7.7285	7.7205	7.733	7.7285	7.706	7.7035	7.726	7.692	7.7065
1.45833	M7A	TH	PL	1	+	+	top	14.7	30.1	7.711	7.7685	2.28434	851.759	2089.33	79.9526	1.96569	1.24739
1.45833	M7B	TH	PL	2	+	+	top	14.8	30.3	7.608	7.72406	2.27605	947.207	2097.57	73.0622	1.7943	1.13957
1.45833	M1A	TL	PA	1	-	-	bottom	13	30.1	8.134	8.17727	2.10066	268.872	1710.44	157.355	3.8625	2.44259
1.45833	M1B	TL	PA	2	-	-	bottom	12.9	30.3	8.129	8.17198	2.29065	297.833	1874.44	170.489	4.1797	2.64428			Temperature	pH	Replicate	day -- >	0	1	1.45833	2	2.375	3	3.375	4	4.41667	5	5.375	6	6.41667	7	7.41667	8	8.41667	9	9.375	10	10.4167	11	11.375	12	12.375	13
1.45833	M2A	TL	PA	1	+	-	bottom	12.9	30	8.145	8.19595	2.0611	250.707	1665.51	158.987	3.90448	2.46789		Alkalinity	TL	PA	1	M1A	2.10066	2.10285	2.10285	2.27839	2.27839	2.27839	2.27839	2.1925	2.1925	2.1925	2.1925	2.15501	2.15501	2.15501	2.15501	2.10438	2.10438	2.10438	2.10438	2.10438	2.10438	2.13611	2.13611	2.13611	2.13611	2.13611
1.45833	M2B	TL	PA	2	+	-	bottom	13	30	8.136	8.18585	2.15738	270.248	1752.81	164.093	4.03024	2.54788		Alkalinity	TL	PA	2	M1B	2.29065	2.22402	2.22402	2.30609	2.30609	2.30609	2.30609	2.28957	2.28957	2.28957	2.28957	2.23531	2.23531	2.23531	2.23531	2.22478	2.22478	2.22478	2.22478	2.22478	2.22478	2.28335	2.28335	2.28335	2.28335	2.28335
1.45833	M3A	TL	PL	1	+	-	bottom	12.8	29.9	7.801	7.7458	2.11379	827.739	1951.03	65.6582	1.61327	1.01917		Alkalinity	TL	PA	1	M2A	2.0611	2.14595	2.14595	2.17686	2.17686	2.17686	2.17686	2.17893	2.17893	2.17893	2.17893	2.12684	2.12684	2.12684	2.12684	2.08885	2.08885	2.08885	2.08885	2.08885	2.08885	2.09836	2.09836	2.09836	2.09836	2.09836
1.45833	M3B	TL	PL	2	+	-	bottom	12.8	30.1	7.784	7.7727	2.2093	808.785	2029.71	73.0043	1.7917	1.1326		Alkalinity	TL	PA	2	M2B	2.15738	2.15521	2.15521	2.26817	2.26817	2.26817	2.26817	2.24563	2.24563	2.24563	2.24563	2.35285	2.35285	2.35285	2.35285	2.16657	2.16657	2.16657	2.16657	2.16657	2.16657	2.14214	2.14214	2.14214	2.14214	2.14214
1.45833	M4A	TH	PL	1	+	-	bottom	14.9	30.3	7.69	7.77542	2.05669	752.013	1873.12	73.7113	1.81043	1.15005		Alkalinity	TL	PL	1	M3A	2.11379	2.12034	2.12034	2.2156	2.2156	2.2156	2.2156	2.13846	2.13846	2.13846	2.13846	2.03365	2.03365	2.03365	2.03365	2.20114	2.20114	2.20114	2.20114	2.20114	2.20114	2.0764	2.0764	2.0764	2.0764	2.0764
1.45833	M4B	TH	PL	2	+	-	bottom	14.8	30.2	7.742	7.76759	2.18772	816.84	1998.84	76.7894	1.88698	1.19806		Alkalinity	TL	PL	2	M3B	2.2093	2.19418	2.19418	2.29209	2.29209	2.29209	2.29209	2.31855	2.31855	2.31855	2.31855	2.19884	2.19884	2.19884	2.19884	2.19674	2.19674	2.19674	2.19674	2.19674	2.19674	2.16154	2.16154	2.16154	2.16154	2.16154
1.45833	M5A	TL	PA	1	+	+	bottom	13.1	30.1	8.117	8.1707	2.21791	289.584	1813.26	164.932	4.04884	2.56093		Alkalinity	TH	PL	1	M4A	2.05669	2.10991	2.10991	2.14139	2.14139	2.14139	2.14139	2.17051	2.17051	2.17051	2.17051	2.09512	2.09512	2.09512	2.09512	2.06963	2.06963	2.06963	2.06963	2.06963	2.06963	2.08027	2.08027	2.08027	2.08027	2.08027
1.45833	M5B	TL	PA	2	+	+	bottom	12.7	30.1	8.127	8.17233	2.10066	272.498	1717.5	154.452	3.79031	2.39554		Alkalinity	TH	PL	2	M4B	2.18772	2.20063	2.20063	2.22566	2.22566	2.22566	2.22566	2.21733	2.21733	2.21733	2.21733	2.19015	2.19015	2.19015	2.19015	2.12018	2.12018	2.12018	2.12018	2.12018	2.12018	2.22773	2.22773	2.22773	2.22773	2.22773
1.45833	M6A	TL	PL	1	+	+	bottom	13	30.3	7.733	7.81139	2.20499	732.506	2008.19	79.9233	1.95956	1.23995		Alkalinity	TL	PA	1	M5A	2.21791	2.15928	2.15928	2.20525	2.20525	2.20525	2.20525	2.26766	2.26766	2.26766	2.26766	2.18208	2.18208	2.18208	2.18208	2.20525	2.20525	2.20525	2.20525	2.20525	2.20525	2.22826	2.22826	2.22826	2.22826	2.22826
1.45833	M6B	TL	PL	2	+	+	bottom	13	30.1	7.74	7.76865	2.0655	763.62	1895.88	68.07	1.67088	1.05664		Alkalinity	TL	PA	2	M5B	2.10066	2.17217	2.17217	2.2049	2.2049	2.2049	2.2049	2.15919	2.15919	2.15919	2.15919	2.12556	2.12556	2.12556	2.12556	2.06808	2.06808	2.06808	2.06808	2.06808	2.06808	2.13821	2.13821	2.13821	2.13821	2.13821
1.45833	M7A	TH	PL	1	+	+	bottom	14.7	30	7.711	7.76828	2.23081	832.465	2040.17	77.8542	1.91525	1.21501		Alkalinity	TL	PL	1	M6A	2.20499	2.21575	2.21575	2.19248	2.19248	2.19248	2.19248	2.27149	2.27149	2.27149	2.27149	2.21345	2.21345	2.21345	2.21345	2.17562	2.17562	2.17562	2.17562	2.17562	2.17562	2.2136	2.2136	2.2136	2.2136	2.2136
1.45833	M7B	TH	PL	2	+	+	bottom	14.8	30.3	7.608	7.72581	2.12253	878.566	1953.42	68.3161	1.67774	1.06554		Alkalinity	TL	PL	2	M6B	2.0655	2.12228	2.12228	2.26687	2.26687	2.26687	2.26687	2.15206	2.15206	2.15206	2.15206	2.13952	2.13952	2.13952	2.13952	2.16039	2.16039	2.16039	2.16039	2.16039	2.16039	2.13956	2.13956	2.13956	2.13956	2.13956
2	M1A	TL	PA	1	-	-	top	11.4	29.8	8.135	8.18487	2.45613	310.141	2028.57	177.498	4.35907	2.74568		Alkalinity	TH	PL	1	M7A	2.23081	2.25758	2.25758	2.23471	2.23471	2.23471	2.23471	2.24928	2.24928	2.24928	2.24928	2.22218	2.22218	2.22218	2.22218	2.22008	2.22008	2.22008	2.22008	2.22008	2.22008	2.20494	2.20494	2.20494	2.20494	2.20494
2	M1B	TL	PA	2	-	-	top	11.3	29.8	8.129	8.17908	2.32153	297.221	1919.7	165.115	4.05471	2.5535		Alkalinity	TH	PL	2	M7B	2.12253	2.19929	2.19929	2.16804	2.16804	2.16804	2.16804	2.17431	2.17431	2.17431	2.17431	2.30142	2.30142	2.30142	2.30142	2.11107	2.11107	2.11107	2.11107	2.11107	2.11107	2.11816	2.11816	2.11816	2.11816	2.11816
2	M2A	TL	PA	1	+	-	top	11.3	30	8.153	8.18664	2.29262	286.967	1887.45	165.956	4.07085	2.56527
2	M2B	TL	PA	2	+	-	top	11.3	30	8.143	8.20259	2.37896	285.512	1948.12	177.697	4.35884	2.74675
2	M3A	TL	PL	1	+	-	top	11.2	29.9	7.703	7.79244	2.3174	803.82	2133.79	75.2328	1.84634	1.16291
2	M3B	TL	PL	2	+	-	top	11.2	30	7.728	7.77141	2.37488	867.66	2195.2	73.9094	1.81286	1.14218			Temperature	pH	Replicate	day -- >	0	1	1.45833	2	2.375	3	3.375	4	4.41667	5	5.375	6	6.41667	7	7.41667	8	8.41667	9	9.375	10	10.4167	11	11.375	12	12.375	13
2	M4A	TH	PL	1	+	-	top	13.8	29.7	7.749	7.8587	2.22609	660.897	2004.64	90.4484	2.22699	1.4088		pCO2	TL	PA	1	M1A	250.575	272.893	269.987	286.182	307.709	301.862	295.303	283.927	305.595	298.913	285.853	278.743	280.963	284.794	296.001	276.989	302.545	291.384	296.248	310.532	321.053	298.212	314.646	310.375	325.346	309.326
2	M4B	TH	PL	2	+	-	top	13.8	29.7	7.742	7.72696	2.26359	934.681	2093.32	69.7378	1.71706	1.08622		pCO2	TL	PA	2	M1B	273.43	290.676	288.416	293.825	315.896	309.34	304.769	302.54	327.906	320.59	305.169	295.743	297.433	303.119	314.684	304.21	329.386	317.043	323.253	337.042	346.826	324.321	340.569	332.158	350.709	332.188
2	M5A	TL	PA	1	+	+	top	11.5	29.7	8.129	8.16386	2.19258	292.233	1819.17	151.888	3.73247	2.35068		pCO2	TL	PA	1	M2A	243.938	269.511	261.851	271.802	295.078	290.386	291.848	292.409	320.588	315.352	288.252	276.836	280.326	283.205	285.618	277.188	301.781	289.504	313.858	326.621	352.596	335.646	359.916	359.128	382.478	373.321
2	M5B	TL	PA	2	+	+	top	11.1	30.1	8.128	8.10792	2.30915	356.584	1960.07	143.004	3.50547	2.20888		pCO2	TL	PA	2	M2B	255.478	277.019	270.379	270.762	302.082	277.419	312.238	309.053	352.039	318.079	307.223	318.172	321.969	303.563	316.525	286.815	305.932	292.813	308.656	321.114	349.361	328.623	352.193	351.942	376.025	368.762
2	M6A	TL	PL	1	+	+	top	11.3	29.9	7.768	7.76647	2.17997	806.099	2014.19	67.1508	1.6481	1.03824		pCO2	TL	PL	1	M3A	249.2	648.296	830.831	765.513	697.854	740.775	880.686	848.054	891.608	760.536	772.733	724.415	732.523	775.007	824.191	850.441	884.755	850.134	839.175	866.668	885.918	710.03	694.623	667.799	723.429	713.308
2	M6B	TL	PL	2	+	+	top	11.4	29.9	7.726	7.78481	2.46823	874.036	2276.48	79.47	1.95058	1.22901		pCO2	TL	PL	2	M3B	261.5	699.923	802.695	837.001	790.018	812.414	844.343	853.535	855.342	904.7	847.342	795.023	806.752	792.116	803.048	825.838	841.319	810.206	789.441	813.192	806.989	744.958	739.977	733.234	744.005	758.641
2	M7A	TH	PL	1	+	+	top	13.7	30	7.742	7.83245	2.23861	708.629	2027.07	86.3585	2.12234	1.3436		pCO2	TH	PL	1	M4A	243.372	884.26	774.638	631.082	688.073	832.237	909.049	920.673	922.844	871.659	676.587	645.455	654.608	871.263	787.411	911.926	841.104	812.124	829.564	851.366	777.467	775.694	793.389	774.395	782.829	794.471
2	M7B	TH	PL	2	+	+	top	13.8	30.3	7.697	7.78455	2.21354	788.901	2021.89	77.9645	1.91284	1.21233		pCO2	TH	PL	2	M4B	259.977	811.997	824.177	914.767	869.964	879.137	1028.24	1023.23	892.115	991.984	940.092	918.385	930.941	867.592	821.041	821.95	800.893	772.594	858.863	881.052	816.647	898.161	820.872	823.146	829.936	843.345
2	M1A	TL	PA	1	-	-	bottom	11.4	29.9	8.135	8.18688	2.10066	262.223	1723.75	151.874	3.72774	2.34876		pCO2	TL	PA	1	M5A	261.292	293.503	282.947	291.658	317.736	313.038	316.299	325.865	357.861	321.505	292.558	278.622	283.942	300.667	306.045	309.22	327.161	313.593	339.791	353.995	385.634	364.603	389.078	385.593	407.822	403.972
2	M1B	TL	PA	2	-	-	bottom	11.3	30.1	8.129	8.18157	2.29065	290.429	1888.73	164.517	4.03331	2.5424		pCO2	TL	PA	2	M5B	244.62	285.335	282.996	339.274	312.088	318.457	300.863	294.526	314.794	307.06	273.283	265.169	269.841	249.611	253.202	247.513	264.836	252.944	277.889	289.931	323.372	317.926	339.745	343.797	364.869	362.09
2	M2A	TL	PA	1	+	-	bottom	11.3	30.1	8.153	8.18688	2.0611	256.637	1689.53	148.978	3.65235	2.30227		pCO2	TL	PL	1	M6A	264.372	805.228	738.369	810.792	599.136	657.25	766.588	797.241	879.782	923.134	861.065	827.589	841.24	836.251	833.514	691.719	790.711	756.767	803.426	828.841	792.271	717.646	664.761	703.247	842.832	821.44
2	M2B	TL	PA	2	+	-	bottom	11.3	30.2	8.144	8.20484	2.15738	256.013	1757.22	161.861	3.96598	2.50073		pCO2	TL	PL	2	M6B	243.52	757.672	786.861	796.582	789.111	787.855	888.524	840.801	859.1	805.629	765.89	754.069	766.154	738.112	732.66	701.08	809.018	775.389	768.413	794.054	804.615	732.657	736.102	727.967	753.727	727.764
2	M3A	TL	PL	1	+	-	bottom	11.2	30.1	7.702	7.79469	2.11379	727.206	1941.89	69.1406	1.69495	1.06822		pCO2	TH	PL	1	M7A	270.162	894.84	842.112	706.24	771.94	830.468	954.456	959.952	903.132	920.233	858.516	847.469	855.618	833.419	839.573	820.264	830.482	799.705	819.766	843.126	807.631	779.841	777.007	786.357	802.18	832.261
2	M3B	TL	PL	2	+	-	bottom	11.2	30	7.728	7.77141	2.2093	806.343	2040.07	68.6863	1.68475	1.06146		pCO2	TH	PL	2	M7B	255.874	1125.88	912.886	769.106	806.348	851.986	904.325	907.35	885.558	848.365	792.601	837.981	850.57	908.627	902.13	800.283	823.975	792.6	802.779	828.532	804.336	766.635	753.384	793.076	788.395	802.938
2	M4A	TH	PL	1	+	-	bottom	13.8	30.1	7.75	7.86312	2.05669	601.268	1845.26	84.8788	2.08494	1.3206
2	M4B	TH	PL	2	+	-	bottom	13.8	30.1	7.742	7.72964	2.18772	894.854	2019.55	68.3137	1.67804	1.06287
2	M5A	TL	PA	1	+	+	bottom	11.4	30.2	8.13	8.16811	2.21791	291.083	1834.59	155.876	3.81958	2.40885
2	M5B	TL	PA	2	+	+	bottom	11.1	30.1	8.128	8.10969	2.10066	321.963	1777.01	130.179	3.19107	2.01077			Temperature	pH	Replicate	day -- >	0	1	1.45833	2	2.375	3	3.375	4	4.41667	5	5.375	6	6.41667	7	7.41667	8	8.41667	9	9.375	10	10.4167	11	11.375	12	12.375	13
2	M6A	TL	PL	1	+	+	bottom	11.3	29.9	7.767	7.76647	2.20499	815.485	2037.65	67.9326	1.66729	1.05033		HCO3-	TL	PA	1	M1A	1724.45	1735.37	1714.39	1876.16	1873.48	1894.73	1890.25	1822.18	1817.88	1829.45	1809.02	1780.44	1780.19	1789.51	1787.85	1744.15	1753.44	1753.07	1751.38	1771.19	1754.81	1781.81	1780.83	1791.02	1788.74	1792.3
2	M6B	TL	PL	2	+	+	bottom	11.1	29.9	7.726	7.79005	2.0655	719.128	1899.88	66.3648	1.6286	1.02558		HCO3-	TL	PA	2	M1B	1884.38	1842.34	1817.94	1904.21	1902.46	1922.64	1921.09	1910.87	1909.27	1922.27	1899.14	1855.66	1853.85	1866.77	1862.24	1859.02	1864.75	1863.93	1862.36	1881.76	1864.78	1913.85	1911.54	1917.84	1919.11	1921.05
2	M7A	TH	PL	1	+	+	bottom	13.7	29.9	7.742	7.83397	2.23081	703.85	2019.73	86.1529	2.11853	1.34077		HCO3-	TL	PA	1	M2A	1688.02	1764.23	1737.89	1788.49	1790.44	1810.56	1814.03	1820.44	1822.22	1833.33	1801.28	1757.73	1757.83	1767.73	1756.75	1733.82	1740.42	1740.16	1754.67	1771.93	1766.72	1782.45	1786.45	1796.75	1799.21	1808.01
2	M7B	TH	PL	2	+	+	bottom	13.8	30.3	7.699	7.78806	2.12253	749.312	1936.02	75.2598	1.84648	1.17027		HCO3-	TL	PA	2	M2B	1768.58	1777.86	1752.07	1852.67	1861.18	1866.07	1899.9	1884.29	1895.88	1884.7	1867.21	1961.38	1960.98	1952.36	1949.64	1798.68	1802.06	1800.28	1808.28	1825.93	1822.92	1810.59	1815.18	1826.21	1829.79	1839.75
2.375	M1A	TL	PA	1	-	-	top	13.1	30	8.129	8.15815	2.45613	333.195	2026.12	178.633	4.38772	2.77442		HCO3-	TL	PL	1	M3A	1731.5	1930.24	1957.42	2037.84	2010.82	2033.56	2060.06	1990.32	1985.51	1972.75	1971.06	1873.34	1872.24	1882.93	1884.79	2041.93	2039.36	2040.53	2035.45	2044.06	2034.17	1906.8	1895.52	1896.44	1900.24	1908.16
2.375	M1B	TL	PA	2	-	-	top	13	30	8.123	8.15238	2.32153	319.3	1917.38	166.187	4.08167	2.58039		HCO3-	TL	PL	2	M3B	1813.24	2005.54	2015.34	2117.63	2095.93	2114.76	2121.18	2150.02	2136.88	2155.78	2140.66	2029.4	2028.96	2030.57	2024.79	2034.31	2027.69	2029.91	2022.6	2030.84	2016.72	1987.51	1977.36	1983.65	1977.82	1990.36
2.375	M2A	TL	PA	1	+	-	top	13	29.9	8.129	8.15567	2.29262	312.674	1891.15	164.784	4.04955	2.55928		HCO3-	TH	PL	1	M4A	1681.89	1958.03	1924.15	1924.95	1926.42	1970.87	1984.8	2013.98	2001.41	2001.84	1957.09	1888.14	1889.33	1936.37	1915.24	1919.23	1901.81	1901.5	1901.79	1909.31	1884.17	1904.67	1900.29	1902.6	1897.69	1909.44
2.375	M2B	TL	PA	2	+	-	top	13.1	30.2	8.146	8.16389	2.37896	316.883	1954.05	175.373	4.30264	2.7223		HCO3-	TH	PL	2	M4B	1793.99	2024.8	2012.24	2056.43	2036.92	2051.41	2075.83	2069.68	2037.51	2061.82	2049.51	2023.8	2024.72	2018.18	2003.4	1948.93	1938.2	1937.53	1950.27	1957.36	1935.04	2053.87	2031.32	2039.13	2033.11	2046.13
2.375	M3A	TL	PL	1	+	-	top	12.9	30	7.734	7.83299	2.3174	730.905	2105.14	87.1232	2.13962	1.35238		HCO3-	TL	PA	1	M5A	1819.22	1794.49	1765.86	1826.88	1829.16	1848.5	1852.82	1914.17	1914.33	1906.05	1870.02	1797.4	1799.03	1822.67	1813.43	1845.86	1845.08	1846.99	1859.74	1878.56	1875.38	1901.22	1903.16	1912.76	1914.09	1926.78
2.375	M3B	TL	PL	2	+	-	top	13	29.9	7.713	7.79636	2.37488	822.146	2174.07	82.8231	2.03536	1.28633		HCO3-	TL	PA	2	M5B	1717.16	1798.9	1780.29	1868.54	1828.21	1855.97	1842.95	1808.75	1802.83	1813.82	1774.69	1747.54	1748.11	1734.36	1724.59	1692.15	1692.78	1692.52	1710.91	1728.46	1733.17	1802.88	1804.82	1818.41	1820.22	1832.2
2.375	M4A	TH	PL	1	+	-	top	15.5	29.9	7.825	7.82703	2.22609	719.008	2005.73	90.0912	2.21962	1.41007		HCO3-	TL	PL	1	M6A	1812.57	2045.01	2019.64	2025.92	1964.27	1996.07	2018.92	2096.42	2099.73	2115.7	2101.38	2046.78	2047.11	2050.41	2042.48	1989.29	1999.5	2000.8	2005.89	2014.62	1994.39	2025.24	2003.23	2020.38	2041.09	2046.59
2.375	M4B	TH	PL	2	+	-	top	15.5	29.9	7.692	7.7502	2.26359	887.055	2073.3	78.027	1.92239	1.22124		HCO3-	TL	PL	2	M6B	1690.23	1954.08	1949.92	2088.18	2074.53	2087.9	2106.27	2000.78	1991.5	1991.86	1979.35	1969.31	1969.41	1968.76	1959.52	1978.5	1989.66	1990.68	1986.33	1995.67	1983.96	1964.77	1956.86	1962.5	1960.28	1964.07
2.375	M5A	TL	PA	1	+	+	top	13.2	29.8	8.11	8.13352	2.19258	317.306	1820.49	151.538	3.72682	2.35551		HCO3-	TH	PL	1	M7A	1837.18	2089.42	2064.75	2023.4	2025.46	2051.59	2073.59	2088.39	2066.96	2079.52	2063.99	2040.5	2040.49	2039.47	2033.1	2035.53	2028.76	2029.07	2030.33	2038.26	2018.76	2013.93	2003.74	2012.61	2008.63	2024.1
2.375	M5B	TL	PA	2	+	+	top	12.8	29.9	8.048	8.14061	2.30915	328.017	1919.02	160.295	3.93854	2.48816		HCO3-	TH	PL	2	M7B	1744.51	2066.94	2025.5	1978.95	1975.17	1997.35	2007.07	2015.34	1998.8	2001.99	1986.13	2106.44	2108.08	2121.65	2113.93	1936.98	1932.97	1933.58	1932.46	1940.96	1924.61	1936.56	1924.46	1939.17	1931.48	1943.27
2.375	M6A	TL	PL	1	+	+	top	13	29.8	7.708	7.88948	2.17997	596.401	1953.52	92.0076	2.26237	1.42935
2.375	M6B	TL	PL	2	+	+	top	13	29.9	7.728	7.79284	2.46823	862.494	2262.34	85.4897	2.10089	1.32775
2.375	M7A	TH	PL	1	+	+	top	15.4	29.9	7.796	7.79849	2.23861	776.853	2030.66	85.0922	2.09621	1.33138
2.375	M7B	TH	PL	2	+	+	top	15.5	30.2	7.75	7.77007	2.21354	823.56	2017.33	80.0161	1.96777	1.25124			Temperature	pH	Replicate	day -- >	0	1	1.45833	2	2.375	3	3.375	4	4.41667	5	5.375	6	6.41667	7	7.41667	8	8.41667	9	9.375	10	10.4167	11	11.375	12	12.375	13
2.375	M1A	TL	PA	1	-	-	bottom	13.1	30.3	8.131	8.15885	2.10066	282.223	1720.85	153.007	3.75173	2.37445		CO3--	TL	PA	1	M1A	151.548	148.056	156.833	164.686	165.82	157.172	159.037	150.637	152.678	147.716	156.256	152.312	152.443	148.568	149.525	145.767	142.377	142.281	143.004	134.924	141.51	143.54	144.058	139.847	140.925	139.217
2.375	M1B	TL	PA	2	-	-	bottom	13	30.2	8.124	8.15461	2.29065	312.492	1887.55	165.196	4.05262	2.56361		CO3--	TL	PA	2	M1B	166.316	155.405	165.449	164.816	165.692	157.39	158.161	155.352	156.315	150.795	160.365	155.397	156.056	150.985	152.823	149.68	147.523	147.576	148.352	140.236	147.279	151.593	152.66	149.981	149.667	148.58
2.375	M2A	TL	PA	1	+	-	bottom	13	30.2	8.13	8.15813	2.0611	277.483	1689.73	149.088	3.65745	2.31363		CO3--	TL	PA	1	M2A	149.596	154.367	165.41	157.467	156.936	148.693	147.391	145.711	145.404	140.465	153.689	149.492	149.541	145.625	150.194	143.478	141.036	140.88	135.232	128.047	130.138	127.458	126.086	121.801	120.859	117.102
2.375	M2B	TL	PA	2	+	-	bottom	13.1	30	8.148	8.16343	2.15738	287.281	1768.3	157.81	3.87625	2.45101		CO3--	TL	PA	2	M2B	157.309	152.687	163.563	169.779	166.591	164.549	150.842	147.711	143.283	147.471	154.881	161.644	161.858	165.549	166.781	149.712	148.718	149.065	146.041	138.565	139.837	134.333	132.781	128.104	126.736	122.525
2.375	M3A	TL	PL	1	+	-	bottom	12.9	30.1	7.735	7.83322	2.11379	664.803	1916.5	79.5402	1.95227	1.23434		CO3--	TL	PL	1	M3A	154.081	76.583	65.7802	72.1867	83.3317	73.9941	63.2784	59.8486	61.9701	66.9838	67.8164	64.2764	64.694	60.4545	59.7719	64.8249	66.0369	65.4716	67.5701	63.9807	68.0414	68.182	72.9201	72.3652	70.9528	67.7006
2.375	M3B	TL	PL	2	+	-	bottom	13	30.2	7.713	7.79882	2.2093	757.89	2017.79	77.8376	1.90953	1.20793		CO3--	TL	PL	2	M3B	161.024	76.4776	72.5891	71.2979	80.3303	72.6231	69.9797	69.1868	74.7466	66.7829	73.068	68.9266	69.1394	68.5808	70.9642	66.1492	68.919	67.9889	71.0209	67.5088	73.3633	70.5315	74.8006	72.1004	74.5752	69.3935
2.375	M4A	TH	PL	1	+	-	bottom	15.5	30.3	7.828	7.82966	2.05669	657.137	1847.1	84.2293	2.0701	1.31671		CO3--	TH	PL	1	M4A	150.169	61.186	75.076	87.6636	87.1603	69.1083	63.4742	63.6021	68.8713	68.5099	86.914	83.6969	83.3469	64.2951	72.8677	60.7062	67.9127	67.8769	67.8364	64.7039	74.8814	70.8181	72.6893	71.6177	73.6492	68.875
2.375	M4B	TH	PL	2	+	-	bottom	15.5	30.3	7.693	7.75109	2.18772	852.874	2000.53	76.1281	1.871	1.19007		CO3--	TH	PL	2	M4B	159.846	71.3947	76.7664	69.0257	77.0775	71.0861	61.2155	60.2788	73.5274	63.5047	68.5846	67.7714	67.5002	70.1804	76.3273	69.458	74.012	74.0933	68.9793	65.9627	75.1272	71.0521	80.3515	77.1007	79.6157	74.1739
2.375	M5A	TL	PA	1	+	+	bottom	13.2	30.1	8.112	8.13598	2.21791	318.166	1837.84	154.905	3.80301	2.40592		CO3--	TL	PA	1	M5A	162.22	147.631	159.65	153.882	153.221	145.341	143.472	144.717	144.96	148.118	162.985	156.495	156.05	146.567	150.449	146.777	147.383	146.471	141.222	133.395	134.678	133.496	133.026	128.759	128.443	123.114
2.375	M5B	TL	PA	2	+	+	bottom	12.8	30.2	8.05	8.14131	2.10066	296.159	1737.39	146.357	3.58987	2.26999		CO3--	TL	PA	2	M5B	154.376	151.207	159.168	136.591	153.326	142.01	147.434	142.173	144.854	140.061	156.11	153.035	152.945	158.763	162.691	151.719	151.738	151.551	144.183	136.896	135.093	135.851	135.294	129.509	128.906	123.785
2.375	M6A	TL	PL	1	+	+	bottom	13	30	7.71	7.88994	2.20499	601.871	1975.03	93.5461	2.29755	1.45249		CO3--	TL	PL	1	M6A	159.575	69.363	79.813	67.5417	92.7768	79.8298	70.5392	71.5884	70.3945	63.6746	69.6716	67.878	67.8255	66.5358	69.8182	75.7905	71.7452	71.1095	69.1071	65.4148	73.741	76.7108	85.8414	78.6913	70.3547	67.9512
2.375	M6B	TL	PL	2	+	+	bottom	13	30	7.73	7.79483	2.0655	715.728	1886.72	71.7872	1.76314	1.11464		CO3--	TL	PL	2	M6B	150.641	67.7387	69.6073	72.9174	78.6385	73.1859	65.664	61.2128	65.1113	64.8238	69.9277	68.8942	68.9202	69.2993	73.023	73.9022	69.4171	68.8814	70.7574	66.8756	71.6842	70.7116	74.0353	71.6525	72.6288	70.9489
2.375	M7A	TH	PL	1	+	+	bottom	15.4	30.3	7.798	7.80113	2.23081	767.026	2020.25	85.9458	2.11205	1.3431		CO3--	TH	PL	1	M7A	160.423	68.6092	78.9034	86.2557	85.519	74.7942	65.8702	65.8379	74.7449	69.4354	75.8604	74.3101	74.3544	74.7747	77.4008	75.5114	78.4199	78.1491	77.7509	74.3924	82.4169	77.9167	82.167	78.4279	80.1263	73.7257
2.375	M7B	TH	PL	2	+	+	bottom	15.5	30.2	7.751	7.77007	2.12253	789.136	1933.01	76.6715	1.88552	1.19894		CO3--	TH	PL	2	M7B	152.524	53.706	70.6891	76.6121	78.3438	69.3402	65.4042	64.6844	71.5288	70.0265	76.5125	80.2254	79.7068	74.0223	77.312	70.5272	72.268	71.8929	72.4504	68.9504	75.6422	73.5402	78.5123	72.4177	75.6453	70.7247
3.04167	M1A	TL	PA	1	-	-	top	11.2	29.5	8.116	8.16547	2.45613	327.533	2049.4	169.016	4.15708	2.61497
3.04167	M1B	TL	PA	2	-	-	top	11.1	29.6	8.111	8.16168	2.32153	311.932	1936.96	158.114	3.88653	2.44513
3.04167	M2A	TL	PA	1	+	-	top	11.1	29.5	8.114	8.1579	2.29262	311.333	1915.74	154.668	3.80392	2.39238
3.04167	M2B	TL	PA	2	+	-	top	11	29.5	8.123	8.19466	2.37896	292.927	1963.12	171.835	4.22584	2.65726			Temperature	pH	Replicate	day -- >	0	1	1.45833	2	2.375	3	3.375	4	4.41667	5	5.375	6	6.41667	7	7.41667	8	8.41667	9	9.375	10	10.4167	11	11.375	12	12.375	13
3.04167	M3A	TL	PL	1	+	-	top	11.2	29.6	7.789	7.8059	2.3174	778.751	2129.91	76.9282	1.89107	1.18994		Omega Ca	TL	PA	1	M1A	3.72049	3.63299	3.85413	4.04341	4.06972	3.86281	3.90939	3.70401	3.75864	3.63224	3.84697	3.75488	3.75872	3.66167	3.69186	3.59292	3.51827	3.51009	3.52847	3.32895	3.4879	3.53178	3.54618	3.44214	3.4714	3.42409
3.04167	M3B	TL	PL	2	+	-	top	11.2	29.5	7.755	7.78439	2.37488	842.656	2192.5	75.1896	1.84934	1.16331		Omega Ca	TL	PA	2	M1B	4.07974	3.81172	4.05728	4.04401	4.06714	3.86662	3.88958	3.82072	3.85014	3.71169	3.94749	3.82947	3.84318	3.72508	3.76883	3.69205	3.64295	3.63738	3.65927	3.45576	3.62962	3.72957	3.75755	3.69051	3.6874	3.65419
3.04167	M4A	TH	PL	1	+	-	top	13.7	29.5	7.809	7.75048	2.22609	867.604	2051.05	71.5335	1.76316	1.11443		Omega Ca	TL	PA	1	M2A	3.66961	3.78671	4.06467	3.8616	3.8535	3.65312	3.62385	3.58481	3.58569	3.45495	3.78387	3.6801	3.68308	3.59028	3.70412	3.53738	3.48219	3.47235	3.33859	3.15729	3.20639	3.13513	3.10629	2.9989	2.97592	2.88006
3.04167	M4B	TH	PL	2	+	-	top	13.7	29.7	7.731	7.74391	2.26359	895.874	2087.68	72.0442	1.77367	1.1218		Omega Ca	TL	PA	2	M2B	3.85786	3.74428	4.01953	4.16241	4.08944	4.04242	3.71062	3.63396	3.53112	3.62522	3.81289	3.98148	3.98769	4.08271	4.11424	3.69017	3.67496	3.67408	3.60543	3.41473	3.44534	3.30411	3.27308	3.15393	3.12138	3.01504
3.04167	M5A	TL	PA	1	+	+	top	11.4	29.5	8.094	8.13633	2.19258	315.12	1841.09	143.07	3.51942	2.21466		Omega Ca	TL	PL	1	M3A	3.77958	1.87901	1.61673	1.77065	2.04594	1.81702	1.5559	1.47185	1.52674	1.64735	1.67113	1.58333	1.59274	1.4899	1.47404	1.59736	1.6305	1.61494	1.66696	1.57707	1.67618	1.67671	1.79724	1.77989	1.74691	1.66675
3.04167	M5B	TL	PA	2	+	+	top	11.1	29.5	8.097	8.1313	2.30915	336.73	1948.93	148.001	3.63994	2.28925		Omega Ca	TL	PL	2	M3B	3.94993	1.87582	1.781	1.7488	1.97245	1.78575	1.72066	1.7029	1.84208	1.64228	1.79801	1.69654	1.70228	1.69165	1.75014	1.63077	1.69968	1.677	1.75261	1.66261	1.80771	1.735	1.84262	1.77337	1.83599	1.70746
3.04167	M6A	TL	PL	1	+	+	top	11.2	29.3	7.848	7.8495	2.17997	657.571	1986.11	78.7651	1.93941	1.21916		Omega Ca	TH	PL	1	M4A	3.68196	1.50219	1.84736	2.15597	2.14486	1.70146	1.56336	1.56656	1.69965	1.68589	2.14454	2.06425	2.05939	1.58923	1.801	1.49883	1.68116	1.67593	1.67692	1.59723	1.8483	1.74438	1.79287	1.76287	1.81366	1.69616
3.04167	M6B	TL	PL	2	+	+	top	11.3	29.4	7.752	7.79186	2.46823	861.045	2276.67	79.5516	1.95784	1.23138		Omega Ca	TH	PL	2	M4B	3.92253	1.75178	1.88926	1.69755	1.89669	1.74857	1.50899	1.48589	1.81421	1.56543	1.69162	1.66999	1.66633	1.73305	1.88761	1.71487	1.83268	1.82932	1.70458	1.62633	1.85487	1.75067	1.98127	1.90011	1.96312	1.82648
3.04167	M7A	TH	PL	1	+	+	top	13.6	29.5	7.779	7.76743	2.23861	836.201	2056.94	74.314	1.83151	1.1574		Omega Ca	TL	PA	1	M5A	3.97923	3.6195	3.92245	3.77602	3.76491	3.57427	3.52585	3.55927	3.57101	3.64385	4.00985	3.84936	3.84395	3.61574	3.71302	3.61907	3.64058	3.61544	3.4848	3.2894	3.31858	3.28359	3.27959	3.16654	3.16373	3.03062
3.04167	M7B	TH	PL	2	+	+	top	13.7	29.6	7.751	7.74544	2.21354	872.988	2040.73	70.5121	1.73697	1.09824		Omega Ca	TL	PA	2	M5B	3.78683	3.70685	3.91067	3.34827	3.76421	3.48975	3.62585	3.49745	3.56767	3.44358	3.84052	3.76558	3.7666	3.91618	4.01087	3.74209	3.74846	3.73702	3.55688	3.37336	3.32972	3.34277	3.33366	3.18557	3.17278	3.04166
3.04167	M1A	TL	PA	1	-	-	bottom	11.2	29.8	8.118	8.16796	2.10066	276.19	1740.06	145.327	3.56854	2.24692		Omega Ca	TL	PL	1	M6A	3.91671	1.70192	1.95968	1.65769	2.27996	1.96399	1.73558	1.76246	1.73441	1.56563	1.71612	1.67045	1.67108	1.64135	1.72251	1.86912	1.77124	1.75361	1.70559	1.61161	1.81735	1.8873	2.1148	1.93577	1.73277	1.67062
3.04167	M1B	TL	PA	2	-	-	bottom	11.1	29.8	8.112	8.16216	2.29065	306.748	1908.31	156.665	3.84671	2.42163		Omega Ca	TL	PL	2	M6B	3.69745	1.66128	1.71063	1.78959	1.93202	1.80073	1.61608	1.50596	1.60341	1.59395	1.71952	1.69596	1.6981	1.71095	1.80096	1.82303	1.7127	1.69737	1.74583	1.64849	1.76669	1.73976	1.82349	1.76315	1.78832	1.74452
3.04167	M2A	TL	PA	1	+	-	bottom	11.1	29.9	8.115	8.16949	2.0611	269.438	1705.39	142.718	3.50231	2.20552		Omega Ca	TH	PL	1	M7A	3.93753	1.6838	1.94047	2.12044	2.10413	1.84064	1.62324	1.62214	1.84425	1.70937	1.86906	1.83382	1.83597	1.8466	1.91139	1.86469	1.94006	1.92929	1.9229	1.83691	2.0354	1.91991	2.02633	1.93141	1.97485	1.81547
3.04167	M2B	TL	PA	2	+	-	bottom	11	29.9	8.124	8.19739	2.15738	261.911	1769.01	157.263	3.85901	2.4297		Omega Ca	TH	PL	2	M7B	3.74252	1.3174	1.73602	1.87966	1.92664	1.70712	1.61093	1.59511	1.76568	1.7235	1.88353	1.97872	1.97063	1.82819	1.9122	1.7408	1.78649	1.77393	1.79041	1.70275	1.86904	1.81283	1.93646	1.78298	1.86518	1.74067
3.04167	M3A	TL	PL	1	+	-	bottom	11.2	30	7.79	7.80863	2.11379	702.799	1937.21	71.0601	1.74297	1.09814
3.04167	M3B	TL	PL	2	+	-	bottom	11.2	29.6	7.756	7.78463	2.2093	782.172	2037.02	70.0567	1.72215	1.08365
3.04167	M4A	TH	PL	1	+	-	bottom	13.7	29.9	7.81	7.75139	2.05669	796.87	1890.69	66.6832	1.63976	1.03777
3.04167	M4B	TH	PL	2	+	-	bottom	13.7	30	7.731	7.74459	2.18772	862.4	2015.15	70.1281	1.72346	1.09108			Temperature	pH	Replicate	day -- >	0	1	1.45833	2	2.375	3	3.375	4	4.41667	5	5.375	6	6.41667	7	7.41667	8	8.41667	9	9.375	10	10.4167	11	11.375	12	12.375	13
3.04167	M5A	TL	PA	1	+	+	bottom	11.4	29.6	8.096	8.14543	2.21791	310.955	1855.9	147.612	3.62913	2.28444		Omega Ar	TL	PA	1	M1A	2.33889	2.28941	2.43577	2.54722	2.57444	2.43094	2.45945	2.32777	2.37137	2.28518	2.42295	2.36139	2.36468	2.30151	2.32404	2.2587	2.21534	2.20752	2.22156	2.09246	2.20458	2.22364	2.23879	2.16726	2.19128	2.15559
3.04167	M5B	TL	PA	2	+	+	bottom	11	29.8	8.098	8.13684	2.10066	300.183	1763.01	136.02	3.33956	2.10199		Omega Ar	TL	PA	2	M1B	2.56595	2.40157	2.56645	2.54795	2.572	2.43338	2.44581	2.40083	2.42809	2.33323	2.48573	2.40828	2.419	2.33957	2.3739	2.31944	2.29421	2.28831	2.30434	2.17329	2.29373	2.34777	2.37178	2.32404	2.32682	2.30027
3.04167	M6A	TL	PL	1	+	+	bottom	11.2	29.6	7.849	7.85376	2.20499	656.929	2006.03	80.8945	1.98857	1.2513		Omega Ar	TL	PA	1	M2A	2.308	2.38615	2.5683	2.43377	2.43646	2.29895	2.27903	2.25214	2.26001	2.17326	2.38322	2.31578	2.31864	2.25616	2.33339	2.22318	2.19374	2.18449	2.10129	1.98485	2.02652	1.97401	1.95993	1.88807	1.87848	1.81294
3.04167	M6B	TL	PL	2	+	+	bottom	11.3	29.5	7.753	7.79387	2.0655	714.665	1899.12	66.8202	1.64361	1.03408		Omega Ar	TL	PA	2	M2B	2.42699	2.35984	2.54031	2.62374	2.58665	2.54348	2.33289	2.28304	2.22617	2.28112	2.40157	2.50462	2.50993	2.56516	2.59134	2.31984	2.314	2.3114	2.26924	2.14743	2.17758	2.08047	2.0645	1.98549	1.96978	1.89732
3.04167	M7A	TH	PL	1	+	+	bottom	13.6	30	7.78	7.77034	2.23081	824.736	2046.24	75.2745	1.84977	1.17081		Omega Ar	TL	PL	1	M3A	2.37716	1.18377	1.0212	1.11557	1.29336	1.14404	0.978681	0.924692	0.962582	1.03597	1.05154	0.995621	1.00269	0.936487	0.928471	1.00412	1.02718	1.01526	1.04912	0.991411	1.05895	1.05528	1.13328	1.12063	1.10248	1.04832
3.04167	M7B	TH	PL	2	+	+	bottom	13.7	29.8	7.752	7.74765	2.12253	830.983	1953.96	68.1683	1.67727	1.06117		Omega Ar	TL	PL	2	M3B	2.4843	1.18185	1.12601	1.10182	1.24713	1.12348	1.08232	1.06932	1.16119	1.03249	1.13215	1.06733	1.07174	1.06273	1.10249	1.02483	1.07151	1.05428	1.10296	1.04573	1.14191	1.09179	1.16239	1.11652	1.15859	1.07429
3.375	M1A	TL	PA	1	-	-	top	11.1	29.5	8.108	8.17385	2.45613	320.21	2044.11	171.209	4.21072	2.64823		Omega Ar	TH	PL	1	M4A	2.3171	0.948727	1.1724	1.3647	1.36339	1.0761	0.988037	0.989287	1.07818	1.06682	1.35796	1.30635	1.30299	1.00408	1.14089	0.9477	1.06497	1.06051	1.0619	1.01029	1.17471	1.10439	1.13798	1.1171	1.15198	1.07343
3.375	M1B	TL	PA	2	-	-	top	11	29.4	8.103	8.16781	2.32153	307.325	1935.41	158.89	3.90961	2.45761		Omega Ar	TH	PL	2	M4B	2.46755	1.10673	1.19857	1.07454	1.20566	1.10644	0.953232	0.937927	1.15065	0.989636	1.0713	1.05736	1.05484	1.09538	1.19538	1.08432	1.16076	1.15761	1.07963	1.0294	1.17872	1.1082	1.25776	1.20329	1.24624	1.15567
3.375	M2A	TL	PA	1	+	-	top	11	29.4	8.109	8.16072	2.29262	309.211	1915.74	154.726	3.80717	2.39321		Omega Ar	TL	PA	1	M5A	2.50273	2.28199	2.47987	2.37977	2.38072	2.24955	2.21898	2.2365	2.25266	2.29133	2.52621	2.42403	2.42084	2.27211	2.33913	2.27518	2.29404	2.273	2.19449	2.06831	2.0979	2.06755	2.0692	1.99473	1.9969	1.90715
3.375	M2B	TL	PA	2	+	-	top	11	29.4	8.136	8.15185	2.37896	328.92	1996.65	158.002	3.88776	2.44387		Omega Ar	TL	PA	2	M5B	2.38171	2.33616	2.47001	2.10982	2.37907	2.19562	2.27994	2.19691	2.24974	2.16566	2.41875	2.36917	2.37077	2.46021	2.52654	2.35043	2.3607	2.34978	2.23861	2.12103	2.10299	2.10315	2.10243	2.00581	2.00246	1.91526
3.375	M3A	TL	PL	1	+	-	top	11.1	29.4	7.75	7.73743	2.3174	923.226	2156.69	65.9769	1.62353	1.02074		Omega Ar	TL	PL	1	M6A	2.46307	1.07231	1.23907	1.04428	1.44092	1.23523	1.09127	1.10679	1.0936	0.9848	1.08043	1.05138	1.05203	1.03132	1.0851	1.17464	1.11648	1.10285	1.07368	1.01367	1.14846	1.18805	1.33433	1.21921	1.09348	1.05161
3.375	M3B	TL	PL	2	+	-	top	11.1	29.4	7.727	7.76758	2.37488	878.596	2199.95	72.1371	1.77511	1.11605		Omega Ar	TL	PL	2	M6B	2.32518	1.04721	1.08108	1.1273	1.2212	1.13273	1.01619	0.946107	1.01143	1.00271	1.08366	1.06724	1.06902	1.07448	1.13463	1.14549	1.07985	1.06797	1.09908	1.03653	1.1163	1.09515	1.1507	1.1103	1.1287	1.09829
3.375	M4A	TH	PL	1	+	-	top	13.5	29.4	7.715	7.7156	2.22609	945.63	2065.06	65.8144	1.62281	1.02497		Omega Ar	TH	PL	1	M7A	2.47616	1.0634	1.2312	1.34219	1.33724	1.1641	1.02558	1.02447	1.16971	1.08102	1.1839	1.16014	1.16191	1.16726	1.21158	1.1786	1.22939	1.22058	1.21701	1.16171	1.29307	1.21465	1.28591	1.22327	1.25363	1.14884
3.375	M4B	TH	PL	2	+	-	top	13.5	29.3	7.709	7.68021	2.26359	1049.96	2112.62	61.9197	1.52766	0.964557		Omega Ar	TH	PL	2	M7B	2.35369	0.832417	1.10255	1.1913	1.22509	1.0797	1.01822	1.0069	1.11992	1.09024	1.19378	1.25219	1.24641	1.15541	1.21085	1.10088	1.13289	1.12279	1.13397	1.07709	1.18759	1.14695	1.22913	1.12956	1.18408	1.10196
3.375	M5A	TL	PA	1	+	+	top	11.2	29.5	8.085	8.13534	2.19258	315.868	1843.94	141.878	3.48959	2.19509
3.375	M5B	TL	PA	2	+	+	top	11	29.4	8.074	8.1554	2.30915	315.979	1933.83	154.285	3.79631	2.38639
3.375	M6A	TL	PL	1	+	+	top	11.1	29.2	7.793	7.74405	2.17997	854.746	2025.81	62.636	1.543	0.969467
3.375	M6B	TL	PL	2	+	+	top	11.2	29.2	7.736	7.74291	2.46823	972.464	2297.1	71.1095	1.75186	1.1009
3.375	M7A	TH	PL	1	+	+	top	13.5	29.4	7.733	7.71209	2.23861	959.312	2078.05	65.6941	1.61984	1.0231
3.375	M7B	TH	PL	2	+	+	top	13.6	29.4	7.711	7.71975	2.21354	931.043	2051.3	66.2531	1.63379	1.03212
3.375	M1A	TL	PA	1	-	-	bottom	11.1	29.7	8.111	8.17611	2.10066	270.396	1736.4	146.866	3.60807	2.27067
3.375	M1B	TL	PA	2	-	-	bottom	11	29.6	8.104	8.16829	2.29065	302.213	1906.77	157.433	3.86955	2.43401
3.375	M2A	TL	PA	1	+	-	bottom	11	29.7	8.112	8.16321	2.0611	274.484	1712.33	140.056	3.44054	2.16486
3.375	M2B	TL	PA	2	+	-	bottom	11	29.5	8.137	8.15386	2.15738	295.557	1803.15	143.682	3.53349	2.2219
3.375	M3A	TL	PL	1	+	-	bottom	11.1	29.7	7.751	7.73815	2.11379	838.147	1963.42	60.5798	1.48827	0.936619
3.375	M3B	TL	PL	2	+	-	bottom	11.1	29.7	7.728	7.77006	2.2093	810.089	2042.41	67.8223	1.6662	1.04859
3.375	M4A	TH	PL	1	+	-	bottom	13.5	29.8	7.716	7.71476	2.05669	872.469	1904.53	61.134	1.5039	0.951101
3.375	M4B	TH	PL	2	+	-	bottom	13.5	29.6	7.708	7.68265	2.18772	1006.53	2039.03	60.5114	1.49032	0.941908
3.375	M5A	TL	PA	1	+	+	bottom	11.2	29.8	8.09	8.13783	2.21791	316.729	1861.71	145.065	3.5621	2.24287
3.375	M5B	TL	PA	2	+	+	bottom	11	29.6	8.077	8.15587	2.10066	285.747	1752.07	140.583	3.45539	2.1735
3.375	M6A	TL	PL	1	+	+	bottom	11.1	29.6	7.796	7.84075	2.20499	678.429	2012.03	78.4424	1.92816	1.21306
3.375	M6B	TL	PL	2	+	+	bottom	11.2	29.6	7.738	7.74564	2.0655	804.584	1915.45	60.2185	1.48031	0.931474
3.375	M7A	TH	PL	1	+	+	bottom	13.5	29.6	7.734	7.7143	2.23081	949.601	2069.13	66.0463	1.62664	1.02806
3.375	M7B	TH	PL	2	+	+	bottom	13.5	29.8	7.713	7.72531	2.12253	877.608	1962.85	64.5554	1.58807	1.00433
4	M1A	TL	PA	1	-	-	top	10.7	29.2	8.116	8.17385	2.28434	297.793	1904.37	156.003	3.84195	2.41218
4	M1B	TL	PA	2	-	-	top	10.7	29.2	8.108	8.16781	2.28848	303.224	1912.31	154.489	3.80466	2.38877
4	M2A	TL	PA	1	+	-	top	10.7	29.2	8.102	8.16072	2.29676	310.19	1924.54	152.957	3.76695	2.36509
4	M2B	TL	PA	2	+	-	top	10.7	29.2	8.094	8.15185	2.33388	322.91	1962.96	152.857	3.76449	2.36355
4	M3A	TL	PL	1	+	-	top	10.6	29.2	7.678	7.73743	2.16313	859.941	2014.67	60.1866	1.48215	0.930405
4	M3B	TL	PL	2	+	-	top	10.6	29.2	7.71	7.76758	2.4278	897.403	2253.54	72.1613	1.77703	1.11552
4	M4A	TH	PL	1	+	-	top	13.2	29.3	7.679	7.7156	2.28434	970.002	2121.91	66.7108	1.64538	1.03826
4	M4B	TH	PL	2	+	-	top	13.2	29.3	7.645	7.68021	2.24695	1040.72	2098.43	60.8095	1.49983	0.946415
4	M5A	TL	PA	1	+	+	top	10.7	29.2	8.079	8.13534	2.3174	334.965	1960.31	146.958	3.61919	2.27232
4	M5B	TL	PA	2	+	+	top	10.6	29.2	8.096	8.1554	2.21773	303.446	1861.14	145.559	3.5845	2.25014
4	M6A	TL	PL	1	+	+	top	10.7	29.1	7.775	7.74405	2.33799	916.323	2177.27	66.1439	1.62983	1.02295
4	M6B	TL	PL	2	+	+	top	10.7	29.1	7.687	7.74291	2.23861	879.356	2083.96	63.1437	1.55591	0.976551
4	M7A	TH	PL	1	+	+	top	13.3	29.3	7.677	7.71209	2.26775	971.679	2106.96	65.9559	1.62692	1.02682
4	M7B	TH	PL	2	+	+	top	13.3	29.2	7.685	7.71975	2.22609	936.286	2065.55	65.6615	1.62059	1.02248
4	M1A	TL	PA	1	-	-	bottom	10.7	29.8	8.119	8.17611	2.10066	270.062	1740	145.272	3.56608	2.24336
4	M1B	TL	PA	2	-	-	bottom	10.7	29.7	8.109	8.16829	2.29065	301.856	1909.44	156.215	3.83678	2.41289
4	M2A	TL	PA	1	+	-	bottom	10.7	29.6	8.103	8.16321	2.0611	274.628	1716.34	138.464	3.40266	2.13919
4	M2B	TL	PA	2	+	-	bottom	10.7	29.6	8.094	8.15386	2.15738	295.197	1805.61	142.564	3.50342	2.20253
4	M3A	TL	PL	1	+	-	bottom	10.6	29.7	7.679	7.73815	2.11379	836.168	1965.98	59.5105	1.46155	0.918979
4	M3B	TL	PL	2	+	-	bottom	10.6	29.4	7.712	7.77006	2.2093	809.668	2046.49	66.2123	1.62878	1.02313
4	M4A	TH	PL	1	+	-	bottom	13.2	29.8	7.678	7.71476	2.05669	871.344	1906.06	60.4934	1.48774	0.940314
4	M4B	TH	PL	2	+	-	bottom	13.2	29.5	7.647	7.68265	2.18772	1005.74	2040.92	59.7481	1.47195	0.929439
4	M5A	TL	PA	1	+	+	bottom	10.7	29.7	8.079	8.13783	2.21791	316.765	1868.03	142.476	3.49934	2.20068
4	M5B	TL	PA	2	+	+	bottom	10.6	29.6	8.097	8.15587	2.10066	285.607	1756.36	138.788	3.4104	2.14368
4	M6A	TL	PL	1	+	+	bottom	10.7	29.4	7.783	7.84075	2.20499	678.158	2015.58	77.0329	1.89508	1.19062
4	M6B	TL	PL	2	+	+	bottom	10.7	29.7	7.668	7.74564	2.0655	802.245	1917.6	59.2818	1.45602	0.915664
4	M7A	TH	PL	1	+	+	bottom	13.3	29.7	7.678	7.7143	2.23081	948.225	2069.81	65.72	1.61736	1.02212
4	M7B	TH	PL	2	+	+	bottom	13.3	29.5	7.689	7.72531	2.12253	878.414	1965.14	63.7074	1.56964	0.991321
4.41667	M1A	TL	PA	1	-	-	top	12.7	29.5	8.112	8.14801	2.28434	319.04	1897.03	159.111	3.91807	2.47157
4.41667	M1B	TL	PA	2	-	-	top	12.7	29.4	8.102	8.1372	2.28848	329.338	1909.38	155.854	3.84004	2.42156
4.41667	M2A	TL	PA	1	+	-	top	12.7	29.2	8.089	8.12792	2.29676	339.454	1924.93	153.102	3.77652	2.37992
4.41667	M2B	TL	PA	2	+	-	top	12.6	29.4	8.094	8.10496	2.33388	366.233	1972.77	148.941	3.6694	2.3135
4.41667	M3A	TL	PL	1	+	-	top	12.6	29.3	7.676	7.72198	2.16313	901.127	2008.91	62.6519	1.5444	0.9734
4.41667	M3B	TL	PL	2	+	-	top	12.6	29.2	7.721	7.76938	2.4278	901.458	2240.49	77.7528	1.91773	1.2083
4.41667	M4A	TH	PL	1	+	-	top	15.3	29.3	7.705	7.7162	2.28434	977.123	2109.73	71.8901	1.77724	1.12635
4.41667	M4B	TH	PL	2	+	-	top	15.2	29.3	7.664	7.7383	2.24695	909.259	2067.07	73.8352	1.8251	1.15644
4.41667	M5A	TL	PA	1	+	+	top	12.8	29.2	8.069	8.10021	2.3174	368.893	1961.19	146.902	3.62392	2.2842
4.41667	M5B	TL	PA	2	+	+	top	12.6	29.5	8.093	8.12988	2.21773	324.856	1853.97	148.579	3.65841	2.30733
4.41667	M6A	TL	PL	1	+	+	top	12.7	29.2	7.843	7.7506	2.33799	909.376	2163	72.1612	1.77998	1.12172
4.41667	M6B	TL	PL	2	+	+	top	12.7	29.3	7.699	7.73849	2.23861	896.145	2073.72	67.4335	1.66242	1.04799
4.41667	M7A	TH	PL	1	+	+	top	15.2	29.4	7.721	7.74026	2.26775	912.755	2085.27	74.9928	1.8526	1.17425
4.41667	M7B	TH	PL	2	+	+	top	15.3	29.3	7.712	7.73367	2.22609	911.46	2048.75	72.6779	1.79672	1.1387
4.41667	M1A	TL	PA	1	-	-	bottom	12.7	29.6	8.112	8.14824	2.10066	292.15	1738.73	146.245	3.59921	2.27117
4.41667	M1B	TL	PA	2	-	-	bottom	12.6	29.5	8.102	8.14047	2.29065	326.473	1909.16	156.776	3.86023	2.43462
4.41667	M2A	TL	PA	1	+	-	bottom	12.7	29.3	8.089	8.12991	2.0611	301.722	1719.51	137.707	3.39485	2.14011
4.41667	M2B	TL	PA	2	+	-	bottom	12.7	29.3	8.094	8.10523	2.15738	337.846	1818.99	137.625	3.39283	2.13884
4.41667	M3A	TL	PL	1	+	-	bottom	12.6	29.5	7.676	7.72068	2.11379	882.089	1962.11	61.2884	1.50908	0.951764
4.41667	M3B	TL	PL	2	+	-	bottom	12.6	29.5	7.721	7.7736	2.2093	809.227	2033.27	71.7404	1.76644	1.11408
4.41667	M4A	TH	PL	1	+	-	bottom	15.3	29.9	7.705	7.71927	2.05669	868.564	1893.08	65.8525	1.62206	1.03001
4.41667	M4B	TH	PL	2	+	-	bottom	15.2	29.9	7.664	7.74137	2.18772	874.97	2007.95	73.2196	1.80332	1.14486
4.41667	M5A	TL	PA	1	+	+	bottom	12.8	29.7	8.069	8.10489	2.21791	346.828	1867.47	143.019	3.51809	2.22113
4.41667	M5B	TL	PA	2	+	+	bottom	12.6	29.4	8.093	8.13318	2.10066	304.731	1751.68	141.129	3.47693	2.19215
4.41667	M6A	TL	PL	1	+	+	bottom	12.6	29.6	7.843	7.75266	2.20499	850.187	2036.45	68.6277	1.68884	1.06548
4.41667	M6B	TL	PL	2	+	+	bottom	12.7	29.7	7.699	7.73942	2.0655	822.055	1909.28	62.7891	1.54441	0.974864
4.41667	M7A	TH	PL	1	+	+	bottom	15.2	29.8	7.721	7.74115	2.23081	893.509	2048.66	74.4971	1.8359	1.16517
4.41667	M7B	TH	PL	2	+	+	bottom	15.3	29.8	7.712	7.73652	2.12253	859.656	1948.84	70.3797	1.73463	1.10114
5.04167	M1A	TL	PA	1	-	-	top	11.2	29.5	8.104	8.15484	2.28434	312.764	1909.65	153.681	3.77989	2.3777
5.04167	M1B	TL	PA	2	-	-	top	11.1	29.3	8.034	8.14678	2.28848	320.668	1921.84	150.547	3.7066	2.32964
5.04167	M2A	TL	PA	1	+	-	top	11.2	29.4	8.085	8.13333	2.29676	333.387	1936.47	147.969	3.64141	2.28984
5.04167	M2B	TL	PA	2	+	-	top	11.2	29.5	8.061	8.13889	2.33388	333.677	1963.86	152.344	3.74701	2.35702
5.04167	M3A	TL	PL	1	+	-	top	11	29.4	7.677	7.78291	2.16313	769.091	1996.44	67.5584	1.66233	1.04495
5.04167	M3B	TL	PL	2	+	-	top	10.9	29.4	7.726	7.74503	2.4278	948.927	2259.15	69.7954	1.71726	1.07928
5.04167	M4A	TH	PL	1	+	-	top	13.8	29.7	7.697	7.7375	2.28434	919.057	2108.89	71.982	1.77231	1.12117
5.04167	M4B	TH	PL	2	+	-	top	13.8	29.2	7.719	7.69422	2.24695	1008.8	2091.13	63.8753	1.57731	0.996177
5.04167	M5A	TL	PA	1	+	+	top	11.1	29.4	8.059	8.1417	2.3174	329.003	1949.61	151.293	3.72293	2.34068
5.04167	M5B	TL	PA	2	+	+	top	11	29.3	8.086	8.13919	2.21773	316.769	1866.95	143.166	3.52463	2.21487
5.04167	M6A	TL	PL	1	+	+	top	11.1	29.3	7.707	7.72833	2.33799	953.173	2179.62	65.1454	1.60394	1.0081
5.04167	M6B	TL	PL	2	+	+	top	11.2	29.4	7.695	7.76111	2.23861	841.243	2073.78	67.2519	1.65502	1.04073
5.04167	M7A	TH	PL	1	+	+	top	13.7	29.6	7.719	7.72962	2.26775	930.438	2097.26	69.8741	1.72125	1.0883
5.04167	M7B	TH	PL	2	+	+	top	13.7	29.7	7.716	7.74918	2.22609	869.367	2050.64	71.6303	1.76348	1.11536
5.04167	M1A	TL	PA	1	-	-	bottom	11.2	29.6	8.106	8.15685	2.10066	285.063	1749.26	141.752	3.48458	2.19265
5.04167	M1B	TL	PA	2	-	-	bottom	11.1	29.4	8.096	8.14702	2.29065	320.511	1922.69	151.043	3.71678	2.33682
5.04167	M2A	TL	PA	1	+	-	bottom	11.2	29.6	8.087	8.13381	2.0611	297.318	1730.18	132.961	3.26849	2.05668
5.04167	M2B	TL	PA	2	+	-	bottom	11.2	29.7	8.063	8.14468	2.15738	302.481	1805.54	142.597	3.50344	2.20523
5.04167	M3A	TL	PL	1	+	-	bottom	11.1	29.6	7.677	7.78224	2.11379	751.981	1949.06	66.4092	1.63238	1.02698
5.04167	M3B	TL	PL	2	+	-	bottom	10.9	29.6	7.728	7.74551	2.2093	860.474	2052.4	63.7704	1.56731	0.985688
5.04167	M4A	TH	PL	1	+	-	bottom	13.8	29.9	7.698	7.73796	2.05669	824.261	1894.8	65.0377	1.59946	1.01246
5.04167	M4B	TH	PL	2	+	-	bottom	13.8	29.8	7.719	7.69558	2.18772	975.171	2032.51	63.1341	1.55355	0.983096
5.04167	M5A	TL	PA	1	+	+	bottom	11.1	29.5	8.062	8.14194	2.21791	314.008	1862.49	144.944	3.56476	2.24197
5.04167	M5B	TL	PA	2	+	+	bottom	11	29.8	8.089	8.14039	2.10066	297.35	1760.69	136.955	3.36253	2.11644
5.04167	M6A	TL	PL	1	+	+	bottom	11.1	29.8	7.707	7.72952	2.20499	893.096	2051.77	62.2038	1.52733	0.961504
5.04167	M6B	TL	PL	2	+	+	bottom	11.1	29.7	7.695	7.76297	2.0655	770.016	1909.93	62.3957	1.53288	0.964694
5.04167	M7A	TH	PL	1	+	+	bottom	13.6	29.8	7.71	7.73121	2.23081	910.029	2061.78	68.9967	1.69749	1.07374
5.04167	M7B	TH	PL	2	+	+	bottom	13.7	29.8	7.717	7.74941	2.12253	827.362	1953.34	68.4226	1.68353	1.06513
5.375	M1A	TL	PA	1	-	-	top	12.7	29.2	8.097	8.16149	2.28434	308.446	1889.67	162.378	4.00533	2.52411
5.375	M1B	TL	PA	2	-	-	top	12.6	29.2	8.089	8.15411	2.28848	315.214	1899.91	159.896	3.94376	2.48483
5.375	M2A	TL	PA	1	+	-	top	12.7	29.2	8.077	8.1562	2.29676	314.633	1904.24	161.648	3.98734	2.51277
5.375	M2B	TL	PA	2	+	-	top	12.7	29.4	8.082	8.14432	2.33388	329.702	1943.11	161.231	3.97252	2.5051
5.375	M3A	TL	PL	1	+	-	top	12.5	29.2	7.723	7.76913	2.16313	802.027	1993.65	68.8855	1.69887	1.07019
5.375	M3B	TL	PL	2	+	-	top	12.5	29.4	7.685	7.76254	2.4278	915.383	2242.89	76.6786	1.88893	1.19071
5.375	M4A	TH	PL	1	+	-	top	15.3	29.3	7.704	7.8312	2.28434	732.837	2062	91.5659	2.26366	1.43463
5.375	M4B	TH	PL	2	+	-	top	15.3	29.4	7.667	7.70737	2.24695	981.581	2077.51	69.5234	1.71769	1.08897
5.375	M5A	TL	PA	1	+	+	top	12.7	29.6	8.084	8.16594	2.3174	308.239	1910.82	167.407	4.12001	2.5998
5.375	M5B	TL	PA	2	+	+	top	12.5	29.3	8.08	8.17165	2.21773	290.772	1826.84	159.841	3.9398	2.48269
5.375	M6A	TL	PL	1	+	+	top	12.7	29.2	7.671	7.74891	2.33799	913.187	2163.63	71.9018	1.77358	1.11769
5.375	M6B	TL	PL	2	+	+	top	12.7	29.6	7.703	7.77276	2.23861	821.687	2059.92	72.9819	1.79614	1.1334
5.375	M7A	TH	PL	1	+	+	top	15.2	29.7	7.694	7.7495	2.26775	890.365	2080.27	76.941	1.89728	1.20374
5.375	M7B	TH	PL	2	+	+	top	15.2	29.9	7.715	7.76742	2.22609	834.483	2033.43	78.7323	1.93909	1.23106
5.375	M1A	TL	PA	1	-	-	bottom	11.2	29.7	8.099	8.18602	2.10066	263.259	1728.36	150.134	3.68861	2.32178
5.375	M1B	TL	PA	2	-	-	bottom	11.1	29.7	8.088	8.17683	2.29065	295.124	1898.37	160.833	3.95121	2.48663
5.375	M2A	TL	PA	1	+	-	bottom	11.2	29.7	8.077	8.18071	2.0611	261.87	1698.32	145.73	3.5804	2.25367
5.375	M2B	TL	PA	2	+	-	bottom	11.2	29.5	8.087	8.16782	2.15738	284.743	1791.32	148.532	3.65326	2.29804
5.375	M3A	TL	PL	1	+	-	bottom	11.1	29.3	7.723	7.78757	2.11379	743.439	1948.47	66.7473	1.64338	1.03288
5.375	M3B	TL	PL	2	+	-	bottom	10.9	29.6	7.685	7.78558	2.2093	779.302	2038.43	69.4574	1.70708	1.07359
5.375	M4A	TH	PL	1	+	-	bottom	13.8	29.7	7.704	7.85185	2.05669	620.338	1852.18	82.262	2.02542	1.28129
5.375	M4B	TH	PL	2	+	-	bottom	13.8	29.7	7.667	7.7289	2.18772	898.604	2021.5	67.6458	1.66555	1.05363
5.375	M5A	TL	PA	1	+	+	bottom	11.1	29.5	8.084	8.18877	2.21791	276.877	1829.22	158.562	3.89969	2.45261
5.375	M5B	TL	PA	2	+	+	bottom	11	29.8	8.081	8.19625	2.10066	255.794	1722.54	152.38	3.74124	2.35481
5.375	M6A	TL	PL	1	+	+	bottom	11.1	29.5	7.672	7.77031	2.20499	808.942	2039.13	67.4414	1.65866	1.04317
5.375	M6B	TL	PL	2	+	+	bottom	11.1	29.7	7.703	7.79561	2.0655	710.094	1898.78	66.8735	1.64289	1.03392
5.375	M7A	TH	PL	1	+	+	bottom	13.6	29.7	7.694	7.77013	2.23081	826.667	2047.71	74.7799	1.84084	1.16405
5.375	M7B	TH	PL	2	+	+	bottom	13.7	29.8	7.715	7.78839	2.12253	750.719	1938.84	74.2927	1.82796	1.15651
6	M1A	TL	PA	1	-	-	top	11.7	29.1	8.11	8.17562	2.20936	286.885	1827.99	155.855	3.84326	2.41656
6	M1B	TL	PA	2	-	-	top	11.6	29.1	8.101	8.16821	2.17997	288.631	1809.31	151.075	3.72508	2.34182
6	M2A	TL	PA	1	+	-	top	11.6	29.1	8.106	8.17175	2.19258	287.598	1817.59	153.009	3.77276	2.3718
6	M2B	TL	PA	2	+	-	top	11.6	29.2	8.092	8.15959	2.54831	346.611	2130.92	174.835	4.30855	2.70955
6	M3A	TL	PL	1	+	-	top	11.5	29.1	7.713	7.78188	1.9535	698.039	1799.03	61.4801	1.51581	0.952757
6	M3B	TL	PL	2	+	-	top	11.5	29.4	7.706	7.77551	2.18838	794.389	2019.87	68.4906	1.68587	1.06071
6	M4A	TH	PL	1	+	-	top	14.3	29.5	7.805	7.84479	2.13355	657.524	1923.44	85.2617	2.10285	1.33077
6	M4B	TH	PL	2	+	-	top	14.3	29.6	7.684	7.72053	2.19258	921.943	2026.64	67.6352	1.66713	1.05538
6	M5A	TL	PA	1	+	+	top	11.7	29.4	8.113	8.17986	2.14624	274.523	1768.46	153.31	3.77423	2.37554
6	M5B	TL	PA	2	+	+	top	11.4	29.4	8.119	8.18773	2.15047	269.223	1769.88	154.462	3.80174	2.39154
6	M6A	TL	PL	1	+	+	top	11.6	29.4	7.695	7.76359	2.22191	831.285	2054.97	68.0533	1.67523	1.05421
6	M6B	TL	PL	2	+	+	top	11.6	29.3	7.717	7.78636	2.21354	783.114	2039.33	71.0083	1.74894	1.10023
6	M7A	TH	PL	1	+	+	top	14.3	29.3	7.721	7.76018	2.21354	845.122	2033	73.83	1.82305	1.15295
6	M7B	TH	PL	2	+	+	top	14.3	29.4	7.739	7.77794	2.4803	906.916	2273.59	86.2087	2.12746	1.34591
6	M1A	TL	PA	1	-	-	bottom	11.7	29.2	8.112	8.17762	2.10066	270.601	1732.89	148.77	3.66651	2.30621
6	M1B	TL	PA	2	-	-	bottom	11.6	29.3	8.102	8.16868	2.29065	302.855	1902.02	159.718	3.93386	2.47474
6	M2A	TL	PA	1	+	-	bottom	11.6	29.7	8.107	8.17493	2.0611	266.074	1697.87	145.976	3.58744	2.25976
6	M2B	TL	PA	2	+	-	bottom	11.6	29.4	8.094	8.16183	2.15738	289.733	1791.85	148.454	3.65441	2.2997
6	M3A	TL	PL	1	+	-	bottom	11.4	29.4	7.712	7.78389	2.11379	750.79	1947.64	67.0727	1.65085	1.03849
6	M3B	TL	PL	2	+	-	bottom	11.4	29.4	7.707	7.77858	2.2093	795.656	2038.93	69.3626	1.70721	1.07394
6	M4A	TH	PL	1	+	-	bottom	14.3	29.5	7.805	7.84479	2.05669	633.387	1852.84	82.132	2.02566	1.28192
6	M4B	TH	PL	2	+	-	bottom	14.3	29.7	7.683	7.72251	2.18772	914.827	2020.96	67.9075	1.67285	1.05934
6	M5A	TL	PA	1	+	+	bottom	11.7	29.7	8.115	8.18057	2.21791	282.721	1826.34	159.68	3.9245	2.47253
6	M5B	TL	PA	2	+	+	bottom	11.4	29.5	8.12	8.18974	2.10066	261.114	1725.19	151.607	3.72941	2.34681
6	M6A	TL	PL	1	+	+	bottom	11.6	29.5	7.694	7.76382	2.20499	823.894	2038.59	67.7027	1.66568	1.04854
6	M6B	TL	PL	2	+	+	bottom	11.6	29.5	7.72	7.7886	2.0655	725.024	1899.29	66.78	1.64298	1.03425
6	M7A	TH	PL	1	+	+	bottom	14.3	29.5	7.721	7.76063	2.23081	849.816	2048.01	74.7903	1.84458	1.16733
6	M7B	TH	PL	2	+	+	bottom	14.3	29.6	7.741	7.78014	2.12253	769.046	1939.28	74.242	1.82998	1.15847
6.41667	M1A	TL	PA	1	-	-	top	11.9	29.1	8.114	8.17274	2.20936	289.169	1827.74	155.989	3.8472	2.41995
6.41667	M1B	TL	PA	2	-	-	top	11.8	29.3	8.11	8.1658	2.17997	290.056	1807.01	151.892	3.7417	2.35473
6.41667	M2A	TL	PA	1	+	-	top	11.9	29.3	8.115	8.1679	2.19258	290.165	1815.14	153.901	3.79149	2.38651
6.41667	M2B	TL	PA	2	+	-	top	11.9	29.2	8.103	8.15529	2.54831	350.746	2130.48	175.067	4.31532	2.71532
6.41667	M3A	TL	PL	1	+	-	top	11.8	29.3	7.739	7.77845	1.9535	704.066	1797.78	61.938	1.52577	0.960199
6.41667	M3B	TL	PL	2	+	-	top	11.9	29.3	7.704	7.77008	2.18838	807.056	2019.95	68.5242	1.68815	1.06259
6.41667	M4A	TH	PL	1	+	-	top	14.6	29.1	7.718	7.83995	2.13355	668.051	1925.56	84.5982	2.09214	1.32306
6.41667	M4B	TH	PL	2	+	-	top	14.6	29.3	7.694	7.71604	2.19258	935.08	2027.81	67.2794	1.66187	1.05167
6.41667	M5A	TL	PA	1	+	+	top	12.1	29.3	8.118	8.17387	2.14624	279.336	1769.02	153.226	3.77547	2.37732
6.41667	M5B	TL	PA	2	+	+	top	11.8	29.2	8.127	8.18149	2.15047	274.375	1771.49	154.03	3.79646	2.38839
6.41667	M6A	TL	PL	1	+	+	top	12	29.2	7.751	7.75794	2.22191	845.489	2055.55	67.9136	1.67418	1.05364
6.41667	M6B	TL	PL	2	+	+	top	12	29.1	7.751	7.78068	2.21354	796.569	2039.94	70.8593	1.74777	1.09958
6.41667	M7A	TH	PL	1	+	+	top	14.6	29.3	7.724	7.75632	2.21354	854.281	2032.66	73.9954	1.82776	1.15664
6.41667	M7B	TH	PL	2	+	+	top	14.6	29.1	7.742	7.77339	2.4803	920.02	2275.03	85.7495	2.12061	1.34107
6.41667	M1A	TL	PA	1	-	-	bottom	11.9	29.2	8.116	8.17474	2.10066	272.757	1732.65	148.897	3.67025	2.30942
6.41667	M1B	TL	PA	2	-	-	bottom	11.8	29.4	8.11	8.16604	2.29065	304.81	1900.69	160.22	3.94465	2.48327
6.41667	M2A	TL	PA	1	+	-	bottom	11.9	29.4	8.115	8.16991	2.0611	270.487	1700.52	145.181	3.57468	2.25078
6.41667	M2B	TL	PA	2	+	-	bottom	11.9	29.4	8.104	8.15753	2.15738	293.192	1791.48	148.649	3.66007	2.30455
6.41667	M3A	TL	PL	1	+	-	bottom	11.8	29.5	7.739	7.77892	2.11379	760.981	1946.71	67.45	1.65971	1.04518
6.41667	M3B	TL	PL	2	+	-	bottom	11.8	29.5	7.704	7.77361	2.2093	806.448	2037.97	69.7545	1.71642	1.08089
6.41667	M4A	TH	PL	1	+	-	bottom	14.6	29.4	7.719	7.84062	2.05669	641.164	1853.1	82.0957	2.02664	1.28293
6.41667	M4B	TH	PL	2	+	-	bottom	14.6	29.5	7.695	7.71823	2.18772	926.801	2021.64	67.721	1.67078	1.05801
6.41667	M5A	TL	PA	1	+	+	bottom	12.1	29.4	8.12	8.1741	2.21791	288.547	1829.04	158.873	3.91243	2.46437
6.41667	M5B	TL	PA	2	+	+	bottom	11.8	29.5	8.128	8.18396	2.10066	265.307	1724.72	151.86	3.73674	2.35315
6.41667	M6A	TL	PL	1	+	+	bottom	12	29.4	7.751	7.75841	2.20499	836.991	2038.67	67.7375	1.66798	1.05043
6.41667	M6B	TL	PL	2	+	+	bottom	12	29.5	7.752	7.78339	2.0655	735.739	1898.88	66.9811	1.64843	1.03846
6.41667	M7A	TH	PL	1	+	+	bottom	14.5	29.4	7.724	7.75783	2.23081	856.954	2048.32	74.7133	1.84419	1.16718
6.41667	M7B	TH	PL	2	+	+	bottom	14.6	29.2	7.743	7.77537	2.12253	781.12	1941.13	73.664	1.82065	1.15176
7.08333	M1A	TL	PA	1	-	-	top	11.4	29.2	8.122	8.16778	2.20936	292.677	1836.23	152.355	3.75399	2.35993
7.08333	M1B	TL	PA	2	-	-	top	11.4	28.8	8.109	8.15798	2.17997	297.379	1821.24	146.391	3.61495	2.26942
7.08333	M2A	TL	PA	1	+	-	top	11.4	28.8	8.111	8.16507	2.19258	293.52	1827.17	149.284	3.68638	2.31426
7.08333	M2B	TL	PA	2	+	-	top	11.4	28.9	8.124	8.1777	2.54831	330.945	2121.79	178.882	4.41485	2.77254
7.08333	M3A	TL	PL	1	+	-	top	11.4	28.9	7.74	7.75615	1.9535	744.603	1808.5	57.7602	1.42554	0.895242
7.08333	M3B	TL	PL	2	+	-	top	11.4	28.8	7.698	7.77894	2.18838	790.179	2021.8	67.896	1.6766	1.05255
7.08333	M4A	TH	PL	1	+	-	top	14.2	29	7.684	7.72572	2.13355	888.155	1972.54	65.474	1.61939	1.0229
7.08333	M4B	TH	PL	2	+	-	top	14.1	29	7.703	7.74454	2.19258	871.103	2021.75	69.8158	1.72658	1.09038
7.08333	M5A	TL	PA	1	+	+	top	11.6	28.9	8.103	8.15181	2.14624	297.328	1793.34	143.534	3.54304	2.22586
7.08333	M5B	TL	PA	2	+	+	top	11.4	28.9	8.16	8.21135	2.15047	253.631	1757.13	160.073	3.95066	2.48103
7.08333	M6A	TL	PL	1	+	+	top	11.5	28.9	7.805	7.76017	2.22191	840.477	2058.85	66.6214	1.64437	1.03286
7.08333	M6B	TL	PL	2	+	+	top	11.5	28.8	7.728	7.79712	2.21354	764.481	2038.17	71.6446	1.76932	1.11096
7.08333	M7A	TH	PL	1	+	+	top	14.2	28.9	7.724	7.76935	2.21354	827.789	2031.93	74.4035	1.84133	1.16268
7.08333	M7B	TH	PL	2	+	+	top	14.1	28.9	7.713	7.74608	2.4803	983.924	2290.74	79.2043	1.95991	1.23731
7.08333	M1A	TL	PA	1	-	-	bottom	11.4	29.1	8.123	8.16931	2.10066	276.911	1742.79	144.781	3.56934	2.24309
7.08333	M1B	TL	PA	2	-	-	bottom	11.3	29.1	8.111	8.16189	2.29065	308.858	1912.31	155.578	3.83521	2.40973
7.08333	M2A	TL	PA	1	+	-	bottom	11.4	29.4	8.112	8.16648	2.0611	272.889	1708.29	141.966	3.49419	2.19806
7.08333	M2B	TL	PA	2	+	-	bottom	11.4	29.2	8.125	8.18018	2.15738	276.182	1782.92	152.216	3.75057	2.35778
7.08333	M3A	TL	PL	1	+	-	bottom	11.4	29.4	7.74	7.75555	2.11379	805.411	1957.35	63.1488	1.55427	0.977732
7.08333	M3B	TL	PL	2	+	-	bottom	11.4	29.2	7.699	7.77988	2.2093	794.053	2039.33	69.2656	1.70669	1.0729
7.08333	M4A	TH	PL	1	+	-	bottom	14.1	29.2	7.684	7.72569	2.05669	854.371	1900.19	63.1162	1.55907	0.985262
7.08333	M4B	TH	PL	2	+	-	bottom	14.1	29.5	7.703	7.74566	2.18772	864.081	2014.62	70.545	1.73951	1.10038
7.08333	M5A	TL	PA	1	+	+	bottom	11.5	29.1	8.104	8.15548	2.21791	304.006	1851.99	149.601	3.68844	2.31836
7.08333	M5B	TL	PA	2	+	+	bottom	11.4	29.1	8.161	8.21359	2.10066	245.592	1711.58	157.452	3.88171	2.43939
7.08333	M6A	TL	PL	1	+	+	bottom	11.5	29.1	7.805	7.76063	2.20499	832.025	2041.96	66.4502	1.63834	1.02978
7.08333	M6B	TL	PL	2	+	+	bottom	11.5	28.9	7.728	7.79735	2.0655	711.743	1899.35	66.9539	1.65257	1.03801
7.08333	M7A	TH	PL	1	+	+	bottom	14.1	29.6	7.724	7.76519	2.23081	839.05	2047.01	75.146	1.85187	1.17184
7.08333	M7B	TH	PL	2	+	+	bottom	14.1	29.6	7.714	7.74765	2.12253	833.33	1952.55	68.8404	1.69648	1.07351
7.41667	M1A	TL	PA	1	-	-	top	12.5	28.8	8.101	8.15462	2.20936	304.593	1836.43	152.748	3.77557	2.37515
7.41667	M1B	TL	PA	2	-	-	top	12.5	29.3	8.093	8.14518	2.17997	306.805	1813.61	149.302	3.68004	2.31899
7.41667	M2A	TL	PA	1	+	-	top	12.5	29.2	8.1	8.1626	2.19258	294.746	1812.89	154.994	3.8225	2.40796
7.41667	M2B	TL	PA	2	+	-	top	12.5	29.2	8.114	8.1626	2.54831	344.137	2116.68	180.966	4.46303	2.81146
7.41667	M3A	TL	PL	1	+	-	top	12.5	29.2	7.69	7.73208	1.9535	792.722	1809.37	57.4056	1.41575	0.891844
7.41667	M3B	TL	PL	2	+	-	top	12.5	29.2	7.711	7.77442	2.18838	800.931	2015.34	70.4889	1.73841	1.0951
7.41667	M4A	TH	PL	1	+	-	top	15.1	29	7.687	7.76673	2.13355	804.892	1952.57	73.6829	1.8244	1.15457
7.41667	M4B	TH	PL	2	+	-	top	15.1	29.1	7.706	7.76869	2.19258	822.938	2006.22	76.2234	1.88617	1.19407
7.41667	M5A	TL	PA	1	+	+	top	12.7	28.8	8.088	8.14647	2.14624	302.22	1785.73	146.883	3.63132	2.28529
7.41667	M5B	TL	PA	2	+	+	top	12.4	29.1	8.148	8.20616	2.15047	256.868	1747.17	164.133	4.04981	2.54981
7.41667	M6A	TL	PL	1	+	+	top	12.6	28.9	7.687	7.76362	2.22191	837.378	2051.38	69.7732	1.72383	1.08502
7.41667	M6B	TL	PL	2	+	+	top	12.6	29.3	7.731	7.79982	2.21354	760.487	2028.14	75.6661	1.86521	1.1756
7.41667	M7A	TH	PL	1	+	+	top	15.2	29.5	7.73	7.76479	2.21354	837.27	2024.73	77.2201	1.90647	1.20879
7.41667	M7B	TH	PL	2	+	+	top	15.1	28.9	7.707	7.75077	2.4803	976.41	2282.28	82.8311	2.05214	1.29825
7.41667	M1A	TL	PA	1	-	-	bottom	12.5	29.2	8.106	8.15554	2.10066	287.409	1739.27	146.302	3.60814	2.27293
7.41667	M1B	TL	PA	2	-	-	bottom	12.4	29.1	8.095	8.14615	2.29065	322.564	1910.86	156.344	3.85762	2.4288
7.41667	M2A	TL	PA	1	+	-	bottom	12.5	29.2	8.101	8.1626	2.0611	276.491	1700.61	145.394	3.58574	2.25882
7.41667	M2B	TL	PA	2	+	-	bottom	12.5	29.1	8.115	8.16413	2.15738	288.914	1782.6	152.595	3.76545	2.37122
7.41667	M3A	TL	PL	1	+	-	bottom	12.4	29.2	7.687	7.73336	2.11379	855.66	1960.2	62.1382	1.53233	0.965097
7.41667	M3B	TL	PL	2	+	-	bottom	12.5	29.2	7.712	7.77619	2.2093	805.164	2034.24	71.4395	1.76186	1.10987
7.41667	M4A	TH	PL	1	+	-	bottom	15.1	29.6	7.687	7.76805	2.05669	769.931	1877.91	72.0526	1.7776	1.12721
7.41667	M4B	TH	PL	2	+	-	bottom	15.1	29.3	7.706	7.76913	2.18772	819.144	2000.59	76.4313	1.88904	1.19669
7.41667	M5A	TL	PA	1	+	+	bottom	12.7	29.4	8.092	8.14785	2.21791	309.871	1841.12	154.014	3.79471	2.39297
7.41667	M5B	TL	PA	2	+	+	bottom	12.4	29.4	8.15	8.20685	2.10066	249.536	1702.01	161.248	3.97192	2.50327
7.41667	M6A	TL	PL	1	+	+	bottom	12.6	29.4	7.694	7.76301	2.20499	829.65	2033.58	69.8631	1.72119	1.08518
7.41667	M6B	TL	PL	2	+	+	bottom	12.5	29.1	7.732	7.80242	2.0655	704.833	1890.9	70.38	1.7367	1.09366
7.41667	M7A	TH	PL	1	+	+	bottom	15.1	29.4	7.726	7.76586	2.23081	841.875	2041.46	77.5816	1.91632	1.21438
7.41667	M7B	TH	PL	2	+	+	bottom	15.1	29.5	7.708	7.75209	2.12253	827.849	1945.57	71.7928	1.77226	1.12346
8	M1A	TL	PA	1	-	-	top	11.5	29	8.1	8.16941	2.1081	278.121	1748.84	145.539	3.59027	2.25589
8	M1B	TL	PA	2	-	-	top	11.4	28.9	8.092	8.15645	2.15891	295.377	1803.31	144.77	3.57295	2.24383
8	M2A	TL	PA	1	+	-	top	11.5	28.9	8.109	8.16564	2.1166	282.378	1759.54	144.83	3.57473	2.24536
8	M2B	TL	PA	2	+	-	top	11.5	29.1	8.11	8.16788	2.17577	288.286	1807.07	150.198	3.70317	2.32762
8	M3A	TL	PL	1	+	-	top	11.4	28.9	7.675	7.75083	2.28848	885.78	2125.23	67.0506	1.65483	1.03924
8	M3B	TL	PL	2	+	-	top	11.4	28.9	7.719	7.76146	2.18418	823	2023.52	65.4231	1.61466	1.01401
8	M4A	TH	PL	1	+	-	top	14.2	29.2	7.739	7.70161	2.08256	918.756	1931.85	60.9366	1.5054	0.951538
8	M4B	TH	PL	2	+	-	top	14.2	29.2	7.741	7.75248	2.05265	798.121	1886.72	66.9078	1.65292	1.04478
8	M5A	TL	PA	1	+	+	top	11.6	28.9	8.094	8.1465	2.19258	308.301	1836.94	145.236	3.58506	2.25226
8	M5B	TL	PA	2	+	+	top	11.4	28.9	8.151	8.2025	2.0355	245.442	1666.07	148.714	3.67031	2.30497
8	M6A	TL	PL	1	+	+	top	11.5	28.9	7.707	7.82922	2.14624	683.493	1962.85	74.461	1.83787	1.1544
8	M6B	TL	PL	2	+	+	top	11.5	29.1	7.745	7.82084	2.25528	733.061	2066.58	77.2506	1.90463	1.19715
8	M7A	TH	PL	1	+	+	top	14.1	29.1	7.737	7.77284	2.20936	817.695	2026.37	74.8561	1.85015	1.16882
8	M7B	TH	PL	2	+	+	top	14.2	29.4	7.724	7.7617	2.0996	797.145	1926.36	70.0961	1.72964	1.09401
8	M1A	TL	PA	1	-	-	bottom	11.5	29.3	8.102	8.17012	2.10066	275.856	1739.46	145.994	3.59557	2.26151
8	M1B	TL	PA	2	-	-	bottom	11.4	29.1	8.092	8.15691	2.29065	313.044	1914.74	154.59	3.81115	2.39505
8	M2A	TL	PA	1	+	-	bottom	11.4	29.3	8.109	8.16801	2.0611	271.999	1708.09	142.125	3.50002	2.20101
8	M2B	TL	PA	2	+	-	bottom	11.5	29.2	8.112	8.16811	2.15738	285.343	1790.29	149.226	3.67717	2.31206
8	M3A	TL	PL	1	+	-	bottom	11.4	29.5	7.676	7.75048	2.11379	815.101	1958.63	62.5993	1.53989	0.969008
8	M3B	TL	PL	2	+	-	bottom	11.4	29.3	7.72	7.7624	2.2093	828.677	2045.11	66.8753	1.64689	1.03566
8	M4A	TH	PL	1	+	-	bottom	14.2	29.4	7.738	7.70206	2.05669	905.097	1906.6	60.4758	1.49226	0.943861
8	M4B	TH	PL	2	+	-	bottom	14.2	29.4	7.741	7.75468	2.18772	845.78	2011.13	72.0082	1.77683	1.12385
8	M5A	TL	PA	1	+	+	bottom	11.6	29.3	8.096	8.14744	2.21791	310.138	1854.79	148.318	3.65309	2.29811
8	M5B	TL	PA	2	+	+	bottom	11.2	29.1	8.153	8.20764	2.10066	249.583	1718.22	154.724	3.81387	2.39589
8	M6A	TL	PL	1	+	+	bottom	11.5	29.2	7.707	7.82992	2.20499	699.944	2015.74	77.12	1.90037	1.19488
8	M6B	TL	PL	2	+	+	bottom	11.5	28.9	7.746	7.82214	2.0655	669.099	1890.43	70.5538	1.74143	1.09382
8	M7A	TH	PL	1	+	+	bottom	14.1	29.4	7.737	7.77351	2.23081	822.833	2044.69	76.1666	1.87923	1.18838
8	M7B	TH	PL	2	+	+	bottom	14.2	29.3	7.724	7.76323	2.12253	803.421	1947.61	70.9584	1.75195	1.10775
8.41667	M1A	TL	PA	1	-	-	top	12.8	28.8	8.105	8.13624	2.1081	304.978	1758.8	141.835	3.50687	2.20739
8.41667	M1B	TL	PA	2	-	-	top	12.7	28.9	8.092	8.12731	2.15891	319.821	1808.87	142.688	3.52562	2.21954
8.41667	M2A	TL	PA	1	+	-	top	12.8	28.9	8.102	8.13118	2.1166	310.161	1768.69	141.302	3.49172	2.19862
8.41667	M2B	TL	PA	2	+	-	top	12.8	28.8	8.104	8.14329	2.17577	309.175	1812.19	148.532	3.67245	2.31162
8.41667	M3A	TL	PL	1	+	-	top	12.8	28.9	7.684	7.73636	2.28848	923.814	2122.43	68.3155	1.68814	1.06297
8.41667	M3B	TL	PL	2	+	-	top	12.8	29.3	7.693	7.75667	2.18418	835.945	2015.67	68.6074	1.69151	1.06654
8.41667	M4A	TH	PL	1	+	-	top	15.4	29	7.663	7.73666	2.08256	847.428	1914.39	68.1745	1.68866	1.06935
8.41667	M4B	TH	PL	2	+	-	top	15.4	29	7.715	7.76636	2.05265	775.441	1875.73	71.5245	1.77164	1.1219
8.41667	M5A	TL	PA	1	+	+	top	13	28.8	8.084	8.12635	2.19258	326.181	1836.15	145.843	3.60668	2.27111
8.41667	M5B	TL	PA	2	+	+	top	12.8	28.8	8.139	8.1803	2.0355	261.122	1666.7	148.761	3.6781	2.31517
8.41667	M6A	TL	PL	1	+	+	top	13	29.2	7.763	7.77852	2.14624	778.934	1971.56	70.9439	1.75045	1.10376
8.41667	M6B	TL	PL	2	+	+	top	13	29.2	7.755	7.76443	2.25528	848.314	2078.62	72.4085	1.78658	1.12654
8.41667	M7A	TH	PL	1	+	+	top	15.4	29	7.735	7.76985	2.20936	828.37	2019.94	77.6456	1.92325	1.21792
8.41667	M7B	TH	PL	2	+	+	top	15.5	29.4	7.724	7.75372	2.0996	817.148	1921.71	72.092	1.7816	1.12998
8.41667	M1A	TL	PA	1	-	-	bottom	12.8	29	8.106	8.14022	2.10066	300.112	1748.08	142.919	3.52968	2.22329
8.41667	M1B	TL	PA	2	-	-	bottom	12.7	29.1	8.093	8.12776	2.29065	338.952	1920.63	152.357	3.76028	2.36888
8.41667	M2A	TL	PA	1	+	-	bottom	12.8	29.2	8.102	8.14067	2.0611	293.402	1712.15	140.77	3.47267	2.18886
8.41667	M2B	TL	PA	2	+	-	bottom	12.8	29	8.104	8.14727	2.15738	302.688	1791.94	148.903	3.67746	2.31637
8.41667	M3A	TL	PL	1	+	-	bottom	12.8	29.2	7.681	7.73881	2.11379	845.697	1956.28	63.7582	1.57285	0.991385
8.41667	M3B	TL	PL	2	+	-	bottom	12.8	29.2	7.694	7.75644	2.2093	846.694	2039.71	69.2307	1.70785	1.07648
8.41667	M4A	TH	PL	1	+	-	bottom	15.4	29.2	7.664	7.7371	2.05669	834.779	1889.23	67.651	1.67367	1.06058
8.41667	M4B	TH	PL	2	+	-	bottom	15.4	29.1	7.716	7.76658	2.18772	826.344	2000.67	76.4995	1.89372	1.19962
8.41667	M5A	TL	PA	1	+	+	bottom	13	29.2	8.085	8.12726	2.21791	328.141	1854.01	148.923	3.67447	2.31696
8.41667	M5B	TL	PA	2	+	+	bottom	12.8	29.1	8.14	8.18098	2.10066	268.55	1718.87	154.714	3.81882	2.40623
8.41667	M6A	TL	PL	1	+	+	bottom	13	29	7.763	7.77806	2.20499	802.489	2027.44	72.5466	1.79203	1.12921
8.41667	M6B	TL	PL	2	+	+	bottom	12.9	29.2	7.756	7.76748	2.0655	769.722	1900.7	66.4256	1.63881	1.03316
8.41667	M7A	TH	PL	1	+	+	bottom	15.4	29.4	7.734	7.77072	2.23081	832.594	2037.59	79.1941	1.95687	1.24087
8.41667	M7B	TH	PL	2	+	+	bottom	15.5	29.3	7.726	7.75176	2.12253	830.802	1944.23	72.4439	1.79138	1.1358
9	M1A	TL	PA	1	-	-	top	11.9	29	8.088	8.14952	2.1081	293.517	1757.95	141.897	3.50158	2.2018
9	M1B	TL	PA	2	-	-	top	11.8	29.2	8.076	8.14081	2.15891	307.37	1807.06	143.073	3.52641	2.2185
9	M2A	TL	PA	1	+	-	top	11.8	29.1	8.081	8.14588	2.1166	297.345	1767.97	141.298	3.48459	2.19145
9	M2B	TL	PA	2	+	-	top	11.8	29.1	8.094	8.15826	2.17577	295.927	1810.42	148.876	3.67145	2.30897
9	M3A	TL	PL	1	+	-	top	11.7	29	7.684	7.75074	2.28848	886.683	2123.15	67.8972	1.67521	1.05298
9	M3B	TL	PL	2	+	-	top	11.7	28.9	7.703	7.76997	2.18418	806.946	2018.9	67.3318	1.66217	1.04443
9	M4A	TH	PL	1	+	-	top	14.5	29.1	7.711	7.7484	2.08256	819.665	1914.84	67.8816	1.67853	1.06128
9	M4B	TH	PL	2	+	-	top	14.5	29.1	7.742	7.77819	2.05265	749.874	1876.16	71.2322	1.76139	1.11366
9	M5A	TL	PA	1	+	+	top	11.9	28.9	8.079	8.14222	2.19258	311.967	1836.56	145.437	3.59091	2.25719
9	M5B	TL	PA	2	+	+	top	11.7	28.9	8.131	8.19638	2.0355	249.595	1666.95	148.404	3.66355	2.302
9	M6A	TL	PL	1	+	+	top	11.8	28.9	7.728	7.79343	2.14624	748.207	1974.44	69.7707	1.72253	1.08255
9	M6B	TL	PL	2	+	+	top	11.8	29	7.715	7.77952	2.25528	813.957	2081.04	71.3815	1.76132	1.10732
9	M7A	TH	PL	1	+	+	top	14.4	29	7.746	7.78277	2.20936	799.105	2021.1	77.0814	1.90693	1.20502
9	M7B	TH	PL	2	+	+	top	14.4	29.3	7.729	7.76766	2.0996	786.471	1923.44	71.3322	1.76157	1.1143
9	M1A	TL	PA	1	-	-	bottom	11.9	29.1	8.09	8.15329	2.10066	289.251	1748.19	142.666	3.51859	2.21325
9	M1B	TL	PA	2	-	-	bottom	11.8	29.2	8.077	8.14081	2.29065	326.715	1920.8	152.078	3.74835	2.35812
9	M2A	TL	PA	1	+	-	bottom	11.8	29.3	8.09	8.15519	2.0611	281.662	1712.36	140.462	3.46012	2.17752
9	M2B	TL	PA	2	+	-	bottom	11.8	29.3	8.098	8.16227	2.15738	289.7	1790.14	149.254	3.67672	2.31383
9	M3A	TL	PL	1	+	-	bottom	11.7	29.1	7.686	7.75274	2.11379	813.584	1957.9	63.0461	1.55466	0.977542
9	M3B	TL	PL	2	+	-	bottom	11.7	29.2	7.703	7.77067	2.2093	813.465	2040.91	68.646	1.69182	1.06414
9	M4A	TH	PL	1	+	-	bottom	14.5	29.6	7.712	7.74952	2.05669	804.582	1888.15	67.8722	1.67333	1.05974
9	M4B	TH	PL	2	+	-	bottom	14.5	29.6	7.742	7.7793	2.18772	795.314	1998.9	76.9543	1.89724	1.20155
9	M5A	TL	PA	1	+	+	bottom	11.9	29	8.08	8.14245	2.21791	315.218	1857.43	147.505	3.63997	2.28881
9	M5B	TL	PA	2	+	+	bottom	11.7	29.3	8.131	8.19732	2.10066	256.293	1718.08	154.697	3.81048	2.39757
9	M6A	TL	PL	1	+	+	bottom	11.8	29.3	7.729	7.79437	2.20499	765.327	2027.16	72.4483	1.78468	1.12314
9	M6B	TL	PL	2	+	+	bottom	11.8	29.5	7.715	7.78245	2.0655	736.821	1900.32	66.3813	1.63341	1.02862
9	M7A	TH	PL	1	+	+	bottom	14.4	29.7	7.745	7.78433	2.23081	800.304	2037.04	79.2168	1.95165	1.23615
9	M7B	TH	PL	2	+	+	bottom	14.5	29.6	7.728	7.76529	2.12253	798.729	1943.73	72.4535	1.78628	1.13127
9.375	M1A	TL	PA	1	-	-	top	12.4	29	8.082	8.14415	2.1081	297.932	1756.16	142.701	3.52297	2.21735
9.375	M1B	TL	PA	2	-	-	top	12.4	29	8.069	8.1318	2.15891	315.627	1808.28	142.815	3.52578	2.21911
9.375	M2A	TL	PA	1	+	-	top	12.4	28.9	8.062	8.11921	2.1166	320.096	1780.79	136.315	3.3672	2.11858
9.375	M2B	TL	PA	2	+	-	top	12.4	28.9	8.079	8.14039	2.17577	311.194	1817.79	146.102	3.60895	2.27068
9.375	M3A	TL	PL	1	+	-	top	12.2	29	7.691	7.75666	2.28848	875.761	2118.17	69.9888	1.72756	1.0869
9.375	M3B	TL	PL	2	+	-	top	12.3	29	7.7	7.78009	2.18418	788.503	2011.39	70.412	1.73815	1.09378
9.375	M4A	TH	PL	1	+	-	top	15	29.1	7.706	7.74025	2.08256	838.095	1914.93	67.8869	1.67967	1.06312
9.375	M4B	TH	PL	2	+	-	top	15	29.1	7.691	7.73675	2.05265	833.089	1888.22	66.403	1.64296	1.03988
9.375	M5A	TL	PA	1	+	+	top	12.5	29	8.06	8.11097	2.19258	339.07	1850.3	139.821	3.45218	2.17321
9.375	M5B	TL	PA	2	+	+	top	12.2	29	8.111	8.16113	2.0355	274.442	1684.62	141.268	3.48696	2.19384
9.375	M6A	TL	PL	1	+	+	top	12.4	28.9	7.753	7.76974	2.14624	795.607	1979.5	67.7659	1.67392	1.0532
9.375	M6B	TL	PL	2	+	+	top	12.4	29	7.718	7.78585	2.25528	803.311	2075.05	73.8911	1.8242	1.14815
9.375	M7A	TH	PL	1	+	+	top	14.9	29	7.727	7.77455	2.20936	817.199	2021.21	77.0787	1.908	1.20696
9.375	M7B	TH	PL	2	+	+	top	15	29.1	7.72	7.76124	2.0996	801.998	1923.19	71.5558	1.77045	1.12057
9.375	M1A	TL	PA	1	-	-	bottom	12.4	29.2	8.083	8.14638	2.10066	294.563	1746.61	143.308	3.53398	2.22578
9.375	M1B	TL	PA	2	-	-	bottom	12.4	29.3	8.07	8.13602	2.29065	330.879	1916.45	153.888	3.79276	2.38957
9.375	M2A	TL	PA	1	+	-	bottom	12.4	29.1	8.063	8.1232	2.0611	307.62	1728.55	134.15	3.30999	2.08401
9.375	M2B	TL	PA	2	+	-	bottom	12.4	29.1	8.079	8.14262	2.15738	306.119	1798.76	145.981	3.60191	2.2678
9.375	M3A	TL	PL	1	+	-	bottom	12.2	29.2	7.691	7.75889	2.11379	802.588	1952.72	65.1513	1.60636	1.01133
9.375	M3B	TL	PL	2	+	-	bottom	12.2	29.1	7.699	7.78339	2.2093	790.378	2033.8	71.6298	1.76707	1.11214
9.375	M4A	TH	PL	1	+	-	bottom	15	29.4	7.706	7.74266	2.05669	821.034	1888.64	67.7859	1.67416	1.06069
9.375	M4B	TH	PL	2	+	-	bottom	15	29.5	7.691	7.73763	2.18772	884.636	2012.33	71.5557	1.7662	1.11938
9.375	M5A	TL	PA	1	+	+	bottom	12.5	29.2	8.061	8.11319	2.21791	340.511	1869.18	142.623	3.51741	2.21577
9.375	M5B	TL	PA	2	+	+	bottom	12.2	29.2	8.112	8.16336	2.10066	281.336	1737.19	147.098	3.62681	2.28338
9.375	M6A	TL	PL	1	+	+	bottom	12.4	29.2	7.752	7.77219	2.20499	811.245	2032.27	70.4483	1.73726	1.09417
9.375	M6B	TL	PL	2	+	+	bottom	12.3	29.2	7.718	7.78585	2.0655	733.515	1897.6	67.6236	1.66746	1.05
9.375	M7A	TH	PL	1	+	+	bottom	14.9	29.3	7.723	7.77521	2.23081	822.332	2039.45	78.4231	1.93781	1.22706
9.375	M7B	TH	PL	2	+	+	bottom	15	29.5	7.721	7.76387	2.12253	803.561	1941.73	73.3451	1.81037	1.14737
10	M1A	TL	PA	1	-	-	top	11.7	28.9	8.087	8.12636	2.1081	312.464	1776.07	134.573	3.3221	2.08745
10	M1B	TL	PA	2	-	-	top	11.6	29	8.078	8.11547	2.15891	329.307	1827.52	134.838	3.32654	2.09057
10	M2A	TL	PA	1	+	-	top	11.6	28.9	8.066	8.10294	2.1166	333.838	1799.26	128.682	3.17642	1.99554
10	M2B	TL	PA	2	+	-	top	11.6	29	8.087	8.12426	2.17577	324.291	1836.47	138.268	3.41116	2.14375
10	M3A	TL	PL	1	+	-	top	11.5	29	7.698	7.7419	2.28848	905.384	2127.35	66.1545	1.63195	1.02541
10	M3B	TL	PL	2	+	-	top	11.5	29.2	7.723	7.76675	2.18418	811.194	2019.88	66.8173	1.64649	1.03525
10	M4A	TH	PL	1	+	-	top	14.3	29.1	7.712	7.72835	2.08256	860.825	1922.9	64.6027	1.59709	1.00936
10	M4B	TH	PL	2	+	-	top	14.3	29.4	7.707	7.72486	2.05265	854.079	1894.82	63.5815	1.56907	0.992647
10	M5A	TL	PA	1	+	+	top	11.7	29.1	8.058	8.09518	2.19258	352.833	1868.11	132.347	3.26357	2.05207
10	M5B	TL	PA	2	+	+	top	11.5	29.2	8.107	8.14491	2.0355	285.986	1700.99	134.407	3.31202	2.08247
10	M6A	TL	PL	1	+	+	top	11.6	29.2	7.713	7.75515	2.14624	820.475	1987.71	64.2649	1.58372	0.995963
10	M6B	TL	PL	2	+	+	top	11.6	29.2	7.732	7.77097	2.25528	829.637	2084.46	69.8932	1.72242	1.08319
10	M7A	TH	PL	1	+	+	top	14.3	29.1	7.745	7.76125	2.20936	842.302	2029.6	73.5538	1.81838	1.14921
10	M7B	TH	PL	2	+	+	top	14.4	29.3	7.733	7.74799	2.0996	825.983	1930.6	68.4271	1.68983	1.06892
10	M1A	TL	PA	1	-	-	bottom	11.7	29.1	8.091	8.12902	2.10066	308.6	1766.32	135.276	3.33579	2.09748
10	M1B	TL	PA	2	-	-	bottom	11.6	29.4	8.081	8.1199	2.29065	344.777	1936	145.634	3.58499	2.25601
10	M2A	TL	PA	1	+	-	bottom	11.6	29.3	8.069	8.10805	2.0611	319.404	1744.6	127.412	3.13816	1.97417
10	M2B	TL	PA	2	+	-	bottom	11.6	29.4	8.089	8.12716	2.15738	317.938	1815.39	138.863	3.4183	2.15112
10	M3A	TL	PL	1	+	-	bottom	11.5	29.3	7.699	7.74481	2.11379	827.951	1960.77	61.8069	1.52219	0.957411
10	M3B	TL	PL	2	+	-	bottom	11.5	29.4	7.724	7.76897	2.2093	815.191	2041.8	68.2002	1.67872	1.05621
10	M4A	TH	PL	1	+	-	bottom	14.3	29.6	7.712	7.73097	2.05669	841.906	1895.72	64.8051	1.59737	1.01121
10	M4B	TH	PL	2	+	-	bottom	14.3	29.7	7.709	7.72552	2.18772	908.025	2019.89	68.3438	1.6836	1.06614
10	M5A	TL	PA	1	+	+	bottom	11.7	29.1	8.061	8.09717	2.21791	355.156	1889.02	134.442	3.31522	2.08455
10	M5B	TL	PA	2	+	+	bottom	11.5	29.2	8.106	8.1469	2.10066	293.876	1755.94	139.385	3.43469	2.1596
10	M6A	TL	PL	1	+	+	bottom	11.6	29.3	7.715	7.75782	2.20499	837.208	2041.54	66.5647	1.63949	1.03138
10	M6B	TL	PL	2	+	+	bottom	11.6	29.1	7.728	7.77142	2.0655	758.471	1906.88	63.8581	1.57456	0.989869
10	M7A	TH	PL	1	+	+	bottom	14.3	29.5	7.746	7.76341	2.23081	843.951	2046.93	75.231	1.85545	1.17421
10	M7B	TH	PL	2	+	+	bottom	14.4	29.3	7.733	7.74995	2.12253	831.082	1951.31	69.4737	1.71568	1.08526
10.4167	M1A	TL	PA	1	-	-	top	13.7	29.3	8.088	8.11229	2.1081	324.092	1761.12	140.655	3.4709	2.19239
10.4167	M1B	TL	PA	2	-	-	top	13.6	29.3	8.075	8.10656	2.15891	337.246	1809.88	142.119	3.50668	2.21454
10.4167	M2A	TL	PA	1	+	-	top	13.6	29.2	8.05	8.0747	2.1166	360	1794.61	130.654	3.22565	2.03639
10.4167	M2B	TL	PA	2	+	-	top	13.6	29.3	8.067	8.0925	2.17577	352.959	1833.86	139.415	3.43994	2.1724
10.4167	M3A	TL	PL	1	+	-	top	13.4	29.3	7.695	7.7363	2.28848	924.141	2117.3	70.346	1.73538	1.09549
10.4167	M3B	TL	PL	2	+	-	top	13.4	29.4	7.715	7.77347	2.18418	803.258	2005.55	72.7515	1.79368	1.13267
10.4167	M4A	TH	PL	1	+	-	top	16	29.5	7.701	7.76728	2.08256	784.255	1897.26	74.9884	1.85322	1.17708
10.4167	M4B	TH	PL	2	+	-	top	16	29.5	7.693	7.75857	2.05265	789.86	1872.86	72.5532	1.79304	1.13886
10.4167	M5A	TL	PA	1	+	+	top	13.7	29.5	8.038	8.06354	2.19258	383.626	1864.77	133.728	3.29612	2.08337
10.4167	M5B	TL	PA	2	+	+	top	13.4	29.4	8.081	8.10413	2.0355	319.109	1706.02	132.514	3.26712	2.06311
10.4167	M6A	TL	PL	1	+	+	top	13.6	29.3	7.707	7.77789	2.14624	781.547	1967.79	72.4943	1.78874	1.12962
10.4167	M6B	TL	PL	2	+	+	top	13.6	29.3	7.72	7.76734	2.25528	843.749	2073.44	74.5538	1.83955	1.16172
10.4167	M7A	TH	PL	1	+	+	top	16	29.4	7.731	7.78101	2.20936	805.157	2009.58	81.7939	2.02266	1.28428
10.4167	M7B	TH	PL	2	+	+	top	16.1	29.5	7.728	7.76261	2.0996	800.368	1914.26	75.1311	1.85699	1.17974
10.4167	M1A	TL	PA	1	-	-	bottom	13.7	29.7	8.09	8.11671	2.10066	318.015	1748.5	142.365	3.50491	2.21677
10.4167	M1B	TL	PA	2	-	-	bottom	13.6	29.7	8.079	8.10748	2.29065	356.405	1919.69	152.439	3.75256	2.37292
10.4167	M2A	TL	PA	1	+	-	bottom	13.6	29.9	8.052	8.07805	2.0611	345.192	1738.83	129.621	3.18713	2.01665
10.4167	M2B	TL	PA	2	+	-	bottom	13.6	29.8	8.07	8.0954	2.15738	345.762	1811.99	140.26	3.45074	2.18276
10.4167	M3A	TL	PL	1	+	-	bottom	13.4	29.8	7.695	7.73745	2.11379	847.694	1951.04	65.7367	1.61698	1.02241
10.4167	M3B	TL	PL	2	+	-	bottom	13.4	29.6	7.716	7.77392	2.2093	810.721	2027.89	73.9751	1.82174	1.15114
10.4167	M4A	TH	PL	1	+	-	bottom	16	29.9	7.701	7.76815	2.05669	770.68	1871.09	74.7744	1.84337	1.17233
10.4167	M4B	TH	PL	2	+	-	bottom	16	29.8	7.694	7.75748	2.18772	843.434	1997.22	77.7012	1.91671	1.21859
10.4167	M5A	TL	PA	1	+	+	bottom	13.7	29.6	8.04	8.06377	2.21791	387.641	1886	135.629	3.34103	2.11244
10.4167	M5B	TL	PA	2	+	+	bottom	13.4	29.5	8.082	8.10612	2.10066	327.635	1760.32	137.671	3.39232	2.14287
10.4167	M6A	TL	PL	1	+	+	bottom	13.6	29.7	7.707	7.77704	2.20499	802.995	2020.98	74.9878	1.84596	1.16729
10.4167	M6B	TL	PL	2	+	+	bottom	13.5	29.7	7.719	7.76944	2.0655	765.48	1894.48	68.8145	1.69383	1.07088
10.4167	M7A	TH	PL	1	+	+	bottom	15.9	29.8	7.732	7.78133	2.23081	810.105	2027.95	83.04	2.04815	1.30186
10.4167	M7B	TH	PL	2	+	+	bottom	16.1	29.6	7.729	7.76283	2.12253	808.303	1934.96	76.1532	1.88109	1.19544
11	M1A	TL	PA	1	-	-	top	11.7	29.3	8.038	8.14569	2.17156	304.912	1814.92	145.1	3.57411	2.24884
11	M1B	TL	PA	2	-	-	top	11.6	29.3	8.03	8.13994	2.27605	324.969	1910.23	150.137	3.69788	2.32629
11	M2A	TL	PA	1	+	-	top	11.7	29.2	8	8.09415	2.13562	344.074	1818.1	128.792	3.17416	1.99652
11	M2B	TL	PA	2	+	-	top	11.7	29.3	8.017	8.11031	2.1269	327.998	1799.56	132.615	3.26655	2.05532
11	M3A	TL	PL	1	+	-	top	11.4	29.3	7.654	7.79897	2.03902	697.605	1872.89	66.6244	1.64071	1.03177
11	M3B	TL	PL	2	+	-	top	11.4	29.4	7.69	7.79567	2.11379	729.136	1943.45	68.7677	1.69256	1.06473
11	M4A	TH	PL	1	+	-	top	14.2	29.5	7.711	7.76768	2.10385	786.468	1927.67	71.2784	1.75778	1.11217
11	M4B	TH	PL	2	+	-	top	14.2	29.5	7.7	7.73611	2.26775	918.044	2092.4	71.9445	1.77421	1.12256
11	M5A	TL	PA	1	+	+	top	11.7	29.5	7.987	8.08601	2.23861	368.114	1911.23	133.791	3.29188	2.07263
11	M5B	TL	PA	2	+	+	top	11.4	29.4	8.027	8.12334	2.17577	323.913	1835.99	138.153	3.40033	2.13902
11	M6A	TL	PL	1	+	+	top	11.6	29.3	7.696	7.82134	2.22222	720.633	2034.03	76.7651	1.89073	1.18943
11	M6B	TL	PL	2	+	+	top	11.6	29.3	7.687	7.79833	2.21361	760.172	2034.92	72.8353	1.79394	1.12854
11	M7A	TH	PL	1	+	+	top	14	29.4	7.722	7.78914	2.17906	772.399	1991.06	76.5966	1.88964	1.19472
11	M7B	TH	PL	2	+	+	top	14.1	29.5	7.706	7.7794	2.11379	767.164	1933.11	73.1579	1.80394	1.14114
11	M1A	TL	PA	1	-	-	bottom	11.7	29.7	8.041	8.14841	2.10066	291.512	1748.71	141.979	3.48946	2.19844
11	M1B	TL	PA	2	-	-	bottom	11.6	29.7	8.031	8.14266	2.29065	323.672	1917.47	153.049	3.76126	2.36925
11	M2A	TL	PA	1	+	-	bottom	11.6	29.9	7.999	8.09711	2.0611	327.219	1746.81	126.123	3.0961	1.95149
11	M2B	TL	PA	2	+	-	bottom	11.6	29.8	8.018	8.1128	2.15738	329.247	1821.62	136.051	3.34168	2.10562
11	M3A	TL	PL	1	+	-	bottom	11.4	29.8	7.652	7.79839	2.11379	722.455	1940.7	69.7397	1.7127	1.07879
11	M3B	TL	PL	2	+	-	bottom	11.4	29.6	7.691	7.79614	2.2093	760.78	2031.57	72.2953	1.77743	1.11884
11	M4A	TH	PL	1	+	-	bottom	14.2	29.9	7.71	7.76858	2.05669	764.921	1881.66	70.3577	1.73097	1.09661
11	M4B	TH	PL	2	+	-	bottom	14.2	29.8	7.699	7.73854	2.18772	878.279	2015.33	70.1597	1.72713	1.09383
11	M5A	TL	PA	1	+	+	bottom	11.6	29.6	7.988	8.08932	2.21791	361.091	1891.21	133.201	3.27531	2.06248
11	M5B	TL	PA	2	+	+	bottom	11.4	29.5	8.028	8.12358	2.10066	311.94	1769.78	133.549	3.2852	2.06728
11	M6A	TL	PL	1	+	+	bottom	11.6	29.7	7.695	7.82052	2.20499	714.66	2016.44	76.6565	1.88387	1.18667
11	M6B	TL	PL	2	+	+	bottom	11.6	29.7	7.686	7.79928	2.0655	705.142	1894.62	68.5878	1.68558	1.06176
11	M7A	TH	PL	1	+	+	bottom	14	29.8	7.721	7.79005	2.23081	787.284	2036.81	79.2367	1.95018	1.23459
11	M7B	TH	PL	2	+	+	bottom	14.1	29.6	7.706	7.78138	2.12253	766.106	1940.02	73.9225	1.82172	1.15276
11.375	M1A	TL	PA	1	-	-	top	13	29.5	8.052	8.12545	2.17156	321.813	1812.82	146.003	3.59627	2.26991
11.375	M1B	TL	PA	2	-	-	top	12.9	29.5	8.045	8.12148	2.27605	341.363	1906.8	151.599	3.73377	2.35623
11.375	M2A	TL	PA	1	+	-	top	12.9	29.4	8	8.07016	2.13562	366.749	1819.54	128.244	3.16035	1.99372
11.375	M2B	TL	PA	2	+	-	top	12.9	29.3	8.016	8.08578	2.1269	350.688	1802.9	131.427	3.24064	2.04369
11.375	M3A	TL	PL	1	+	-	top	12.8	29.3	7.695	7.81213	2.03902	678.909	1860	71.9321	1.77349	1.11822
11.375	M3B	TL	PL	2	+	-	top	12.8	29.4	7.693	7.80002	2.11379	725.435	1933.58	72.8877	1.79603	1.13281
11.375	M4A	TH	PL	1	+	-	top	15.4	29.5	7.692	7.76044	2.10385	804.406	1923.27	73.1659	1.80681	1.1461
11.375	M4B	TH	PL	2	+	-	top	15.4	29.6	7.661	7.77463	2.26775	837.311	2069.27	81.519	2.01187	1.27658
11.375	M5A	TL	PA	1	+	+	top	13.1	29.2	7.991	8.06182	2.23861	394.255	1914.63	132.783	3.27656	2.06647
11.375	M5B	TL	PA	2	+	+	top	12.8	29.3	8.024	8.09766	2.17577	347.791	1838.89	137.246	3.3838	2.13356
11.375	M6A	TL	PL	1	+	+	top	12.9	29.2	7.721	7.85298	2.22222	669.438	2012.73	85.6453	2.11298	1.33209
11.375	M6B	TL	PL	2	+	+	top	12.9	29.3	7.697	7.79859	2.21361	763.762	2026.81	76.2657	1.88051	1.18593
11.375	M7A	TH	PL	1	+	+	top	15.3	29.5	7.712	7.79132	2.17906	771.294	1981.37	80.6297	1.99089	1.26259
11.375	M7B	TH	PL	2	+	+	top	15.4	29.5	7.703	7.78838	2.11379	753.602	1921.56	77.9595	1.92519	1.22119
11.375	M1A	TL	PA	1	-	-	bottom	12.9	29.7	8.053	8.12899	2.10066	307.479	1748.83	142.112	3.4961	2.20767
11.375	M1B	TL	PA	2	-	-	bottom	12.8	29.7	8.047	8.12502	2.29065	339.775	1916.29	153.72	3.78134	2.38733
11.375	M2A	TL	PA	1	+	-	bottom	12.9	29.5	8	8.07039	2.0611	353.084	1753.35	123.927	3.05222	1.92614
11.375	M2B	TL	PA	2	+	-	bottom	12.9	29.4	8.017	8.08777	2.15738	353.699	1827.45	134.135	3.30552	2.0853
11.375	M3A	TL	PL	1	+	-	bottom	12.7	29.4	7.694	7.80827	2.11379	710.337	1931.04	73.908	1.821	1.14834
11.375	M3B	TL	PL	2	+	-	bottom	12.8	29.5	7.692	7.80201	2.2093	754.519	2021.13	76.7135	1.88922	1.19198
11.375	M4A	TH	PL	1	+	-	bottom	15.4	29.9	7.692	7.76132	2.05669	782.372	1877.31	72.2127	1.77893	1.12986
11.375	M4B	TH	PL	2	+	-	bottom	15.4	29.9	7.663	7.77529	2.18772	804.433	1993.37	79.1839	1.95066	1.23894
11.375	M5A	TL	PA	1	+	+	bottom	13	29.5	7.992	8.06733	2.21791	383.902	1891.68	133.27	3.28262	2.07194
11.375	M5B	TL	PA	2	+	+	bottom	12.7	29.5	8.025	8.10119	2.10066	331.7	1770.75	133.343	3.28353	2.0713
11.375	M6A	TL	PL	1	+	+	bottom	12.9	29.7	7.72	7.85413	2.20499	660.084	1993.73	86.0376	2.11661	1.33657
11.375	M6B	TL	PL	2	+	+	bottom	12.9	29.7	7.697	7.79951	2.0655	708.443	1886.92	71.8048	1.76647	1.11547
11.375	M7A	TH	PL	1	+	+	bottom	15.3	29.9	7.711	7.79396	2.23081	782.72	2026.1	83.7043	2.06178	1.30923
11.375	M7B	TH	PL	2	+	+	bottom	15.4	29.9	7.704	7.78927	2.12253	753.166	1927.35	79.0651	1.94774	1.23708
12	M1A	TL	PA	1	-	-	top	11.8	29.3	8.043	8.13022	2.17156	317.837	1824.31	141.283	3.48034	2.19025
12	M1B	TL	PA	2	-	-	top	11.8	29.4	8.04	8.13222	2.27605	331.548	1912.54	149.142	3.67191	2.31157
12	M2A	TL	PA	1	+	-	top	11.9	29.4	7.987	8.07078	2.13562	365.499	1828.95	124.282	3.06008	1.92677
12	M2B	TL	PA	2	+	-	top	11.8	29.3	8.003	8.086	2.1269	349.865	1813.74	126.867	3.12522	1.96676
12	M3A	TL	PL	1	+	-	top	11.6	29.5	7.723	7.82889	2.03902	647.108	1859.98	71.7556	1.76539	1.11131
12	M3B	TL	PL	2	+	-	top	11.6	29.5	7.711	7.80057	2.11379	720.451	1940.06	70.1203	1.72516	1.08599
12	M4A	TH	PL	1	+	-	top	14.4	29.7	7.697	7.76926	2.10385	782.999	1925	72.306	1.78139	1.12831
12	M4B	TH	PL	2	+	-	top	14.4	29.5	7.711	7.77231	2.26775	839.619	2077.17	78.2172	1.92931	1.22121
12	M5A	TL	PA	1	+	+	top	11.8	29.5	7.982	8.06524	2.23861	388.866	1923.33	128.843	3.17038	1.9965
12	M5B	TL	PA	2	+	+	top	11.7	29.4	8.014	8.09285	2.17577	351.372	1852.55	131.442	3.23587	2.03669
12	M6A	TL	PL	1	+	+	top	11.8	29.3	7.767	7.82953	2.22222	706.606	2029.47	78.6481	1.93741	1.21925
12	M6B	TL	PL	2	+	+	top	11.8	29.4	7.711	7.80147	2.21361	754.44	2032.05	73.9892	1.82163	1.14677
12	M7A	TH	PL	1	+	+	top	14.3	29.6	7.728	7.786	2.17906	778.38	1989.47	77.1979	1.90284	1.20459
12	M7B	TH	PL	2	+	+	top	14.4	29.7	7.726	7.76575	2.11379	793.675	1935.56	72.1182	1.77676	1.12538
12	M1A	TL	PA	1	-	-	bottom	11.8	29.6	8.043	8.13446	2.10066	302.912	1757.74	138.412	3.40394	2.14427
12	M1B	TL	PA	2	-	-	bottom	11.8	29.6	8.04	8.13269	2.29065	332.768	1923.14	150.821	3.70911	2.33651
12	M2A	TL	PA	1	+	-	bottom	11.8	29.4	7.988	8.07032	2.0611	352.757	1764.55	119.321	2.93771	1.84937
12	M2B	TL	PA	2	+	-	bottom	11.8	29.5	8.005	8.08647	2.15738	354.018	1838.68	129.341	3.18264	2.00422
12	M3A	TL	PL	1	+	-	bottom	11.6	29.6	7.719	7.81851	2.11379	688.491	1932.91	72.9747	1.79439	1.12994
12	M3B	TL	PL	2	+	-	bottom	11.6	29.6	7.714	7.80435	2.2093	746.018	2027.23	74.0805	1.82158	1.14706
12	M4A	TH	PL	1	+	-	bottom	14.4	30	7.696	7.76818	2.05669	765.791	1880.19	70.9294	1.74435	1.1059
12	M4B	TH	PL	2	+	-	bottom	14.4	29.8	7.712	7.77299	2.18772	806.672	2001.08	75.9843	1.8709	1.18538
12	M5A	TL	PA	1	+	+	bottom	11.8	29.7	7.984	8.06748	2.21791	382.321	1902.19	128.675	3.16271	1.99295
12	M5B	TL	PA	2	+	+	bottom	11.6	29.7	8.016	8.09487	2.10066	336.223	1784.27	127.577	3.13528	1.97494
12	M6A	TL	PL	1	+	+	bottom	11.8	29.8	7.765	7.82894	2.20499	699.888	2011.29	78.7344	1.93414	1.21917
12	M6B	TL	PL	2	+	+	bottom	11.8	29.6	7.711	7.80194	2.0655	701.495	1892.94	69.3159	1.70467	1.07384
12	M7A	TH	PL	1	+	+	bottom	14.3	29.9	7.728	7.78668	2.23081	794.334	2035.76	79.6578	1.95998	1.24195
12	M7B	TH	PL	2	+	+	bottom	14.3	29.9	7.726	7.76739	2.12253	792.476	1942.77	72.7172	1.7892	1.13374
12.375	M1A	TL	PA	1	-	-	top	13.1	29.3	8.038	8.11311	2.17156	333.217	1821.78	142.505	3.51446	2.21725
12.375	M1B	TL	PA	2	-	-	top	12.9	29.4	8.038	8.11244	2.27605	349.998	1914.01	148.699	3.66443	2.31171
12.375	M2A	TL	PA	1	+	-	top	13	29.6	7.977	8.04642	2.13562	389.878	1831.55	123.25	3.03408	1.91568
12.375	M2B	TL	PA	2	+	-	top	12.9	29.4	7.992	8.06135	2.1269	373.801	1817.29	125.513	3.09306	1.95126
12.375	M3A	TL	PL	1	+	-	top	12.9	29.4	7.73	7.79529	2.03902	707.938	1865.2	69.8133	1.72043	1.08534
12.375	M3B	TL	PL	2	+	-	top	12.8	29.4	7.7	7.79826	2.11379	728.637	1934.24	72.6176	1.78937	1.12861
12.375	M4A	TH	PL	1	+	-	top	15.3	29.9	7.695	7.766	2.10385	791.016	1919.91	74.3726	1.83193	1.16327
12.375	M4B	TH	PL	2	+	-	top	15.4	29.6	7.699	7.76939	2.26775	848.365	2071.44	80.6259	1.98982	1.2626
12.375	M5A	TL	PA	1	+	+	top	13	29.5	7.97	8.04619	2.23861	409.766	1923.22	129.055	3.17881	2.00642
12.375	M5B	TL	PA	2	+	+	top	12.8	29.5	7.997	8.07168	2.17577	371.977	1854.01	130.937	3.22457	2.0345
12.375	M6A	TL	PL	1	+	+	top	12.9	29.3	7.731	7.75806	2.22222	848.136	2050.2	70.2729	1.73274	1.09274
12.375	M6B	TL	PL	2	+	+	top	12.9	29.4	7.703	7.78824	2.21361	783.237	2030.37	74.7723	1.84263	1.16243
12.375	M7A	TH	PL	1	+	+	top	15.3	29.8	7.711	7.78325	2.17906	785.583	1983.23	79.7578	1.96577	1.24787
12.375	M7B	TH	PL	2	+	+	top	15.4	29.6	7.692	7.76939	2.11379	789.865	1928.6	75.0662	1.85261	1.17553
12.375	M1A	TL	PA	1	-	-	bottom	13	29.7	8.042	8.11711	2.10066	317.475	1755.7	139.345	3.42833	2.16531
12.375	M1B	TL	PA	2	-	-	bottom	13	29.5	8.04	8.11312	2.29065	351.421	1924.2	150.636	3.71037	2.34193
12.375	M2A	TL	PA	1	+	-	bottom	12.9	29.5	7.976	8.04748	2.0611	375.077	1766.88	118.468	2.91776	1.84128
12.375	M2B	TL	PA	2	+	-	bottom	12.9	29.6	7.991	8.06181	2.15738	378.25	1842.3	127.958	3.1497	1.98829
12.375	M3A	TL	PL	1	+	-	bottom	12.8	29.7	7.717	7.7919	2.11379	738.92	1935.28	72.0924	1.77339	1.11962
12.375	M3B	TL	PL	2	+	-	bottom	12.8	29.7	7.703	7.79895	2.2093	759.374	2021.4	76.5329	1.88262	1.18858
12.375	M4A	TH	PL	1	+	-	bottom	15.4	30	7.694	7.76504	2.05669	774.642	1875.46	72.9257	1.7954	1.14068
12.375	M4B	TH	PL	2	+	-	bottom	15.4	29.9	7.697	7.7718	2.18772	811.507	1994.78	78.6055	1.93641	1.22989
12.375	M5A	TL	PA	1	+	+	bottom	13	29.5	7.972	8.04619	2.21791	405.878	1904.96	127.831	3.14865	1.98738
12.375	M5B	TL	PA	2	+	+	bottom	12.8	29.7	7.998	8.07215	2.10066	357.761	1786.43	126.876	3.12099	1.97042
12.375	M6A	TL	PL	1	+	+	bottom	12.9	29.7	7.73	7.75898	2.20499	837.527	2031.99	70.4365	1.73281	1.09421
12.375	M6B	TL	PL	2	+	+	bottom	12.9	29.7	7.703	7.7907	2.0655	724.217	1890.2	70.4852	1.734	1.09497
12.375	M7A	TH	PL	1	+	+	bottom	15.3	29.8	7.711	7.77626	2.23081	818.777	2034.03	80.4948	1.98394	1.2594
12.375	M7B	TH	PL	2	+	+	bottom	15.4	29.9	7.692	7.7718	2.12253	786.925	1934.36	76.2244	1.87776	1.19263
13	M1A	TL	PA	1	-	-	top	11.6	29.3	8.032	8.12932	2.17156	318.515	1827.05	140.131	3.45144	2.17125
13	M1B	TL	PA	2	-	-	top	11.5	29.5	8.03	8.13111	2.27605	332.12	1915.85	147.664	3.63267	2.28635
13	M2A	TL	PA	1	+	-	top	11.5	29.4	7.964	8.05474	2.13562	380.911	1842.25	118.821	2.92473	1.84018
13	M2B	TL	PA	2	+	-	top	11.5	29.3	7.978	8.0669	2.1269	367.698	1828.13	120.98	2.97951	1.87402
13	M3A	TL	PL	1	+	-	top	11.4	29.3	7.709	7.7972	2.03902	700.688	1873.51	66.3752	1.63458	1.02791
13	M3B	TL	PL	2	+	-	top	11.4	29.3	7.71	7.78834	2.11379	742.982	1946.5	67.569	1.66397	1.0464
13	M4A	TH	PL	1	+	-	top	14	29.6	7.701	7.758	2.10385	804.558	1931.95	69.4947	1.71242	1.08338
13	M4B	TH	PL	2	+	-	top	13.9	29.6	7.706	7.76094	2.26775	861.555	2084.32	75.2012	1.85285	1.17198
13	M5A	TL	PA	1	+	+	top	11.6	29.3	7.963	8.0479	2.23861	407.386	1937.36	123.189	3.03416	1.90875
13	M5B	TL	PA	2	+	+	top	11.4	29.7	7.988	8.07269	2.17577	369.472	1865.81	125.804	3.09127	1.9465
13	M6A	TL	PL	1	+	+	top	11.4	29.4	7.67	7.76556	2.22222	826.617	2055.69	67.867	1.6704	1.05078
13	M6B	TL	PL	2	+	+	top	11.5	29.3	7.701	7.79954	2.21361	757.574	2035.07	72.765	1.79207	1.12716
13	M7A	TH	PL	1	+	+	top	13.9	29.5	7.719	7.76247	2.17906	824.724	2001.48	72.3027	1.78248	1.1271
13	M7B	TH	PL	2	+	+	top	14	29.7	7.706	7.75822	2.11379	807.468	1940.7	70.0046	1.72397	1.09104
13	M1A	TL	PA	1	-	-	bottom	11.5	29.8	8.035	8.13714	2.10066	300.138	1757.54	138.303	3.39675	2.13993
13	M1B	TL	PA	2	-	-	bottom	11.5	29.6	8.032	8.13312	2.29065	332.256	1926.25	149.496	3.67571	2.31419
13	M2A	TL	PA	1	+	-	bottom	11.5	29.7	7.964	8.05545	2.0611	365.731	1773.77	115.383	2.83539	1.7857
13	M2B	TL	PA	2	+	-	bottom	11.5	29.6	7.979	8.06938	2.15738	369.826	1851.38	124.071	3.05057	1.92061
13	M3A	TL	PL	1	+	-	bottom	11.4	29.4	7.702	7.79744	2.11379	725.929	1942.81	69.0261	1.69892	1.06873
13	M3B	TL	PL	2	+	-	bottom	11.4	29.6	7.71	7.78906	2.2093	774.299	2034.21	71.2181	1.75094	1.10217
13	M4A	TH	PL	1	+	-	bottom	14	29.8	7.7	7.75845	2.05669	784.384	1886.93	68.2554	1.67991	1.06349
13	M4B	TH	PL	2	+	-	bottom	13.9	29.8	7.707	7.76315	2.18772	825.135	2007.94	73.1467	1.80011	1.13935
13	M5A	TL	PA	1	+	+	bottom	11.6	29.5	7.963	8.05014	2.21791	400.557	1916.21	123.038	3.02709	1.90555
13	M5B	TL	PA	2	+	+	bottom	11.4	29.7	7.988	8.07446	2.10066	354.708	1798.58	121.766	2.99205	1.88402
13	M6A	TL	PL	1	+	+	bottom	11.4	29.8	7.67	7.76651	2.20499	816.263	2037.49	68.0354	1.67085	1.05243
13	M6B	TL	PL	2	+	+	bottom	11.5	29.9	7.702	7.80273	2.0655	697.954	1893.07	69.1328	1.69697	1.06941
13	M7A	TH	PL	1	+	+	bottom	14	29.9	7.712	7.76395	2.23081	839.798	2046.72	75.1486	1.84847	1.17057
13	M7B	TH	PL	2	+	+	bottom	14	29.9	7.707	7.76395	2.12253	798.408	1945.85	71.4449	1.75737	1.11288
13.375	M1A	TL	PA	1	-	-	top	11.9	29.3	8.034	8.12536	2.17156	322.025	1826.48	140.412	3.45916	2.17733
13.375	M1B	TL	PA	2	-	-	top	11.9	29.4	8.034	8.1256	2.27605	337.504	1916.04	147.715	3.63705	2.29005
13.375	M2A	TL	PA	1	+	-	top	11.9	29.3	7.958	8.04933	2.13562	386.975	1842.37	118.888	2.9289	1.84356
13.375	M2B	TL	PA	2	+	-	top	11.9	29.3	7.969	8.06171	2.1269	373.046	1827.4	121.331	2.98909	1.88144
13.375	M3A	TL	PL	1	+	-	top	11.8	29.3	7.696	7.79239	2.03902	710.338	1872.96	66.6329	1.64143	1.03298
13.375	M3B	TL	PL	2	+	-	top	11.8	29.4	7.686	7.78378	2.11379	752.299	1945.42	68.0079	1.67437	1.05406
13.375	M4A	TH	PL	1	+	-	top	14.4	29.5	7.68	7.75303	2.10385	816.344	1931.89	69.5876	1.71646	1.08647
13.375	M4B	TH	PL	2	+	-	top	14.3	30	7.683	7.7571	2.26775	869.095	2081.49	76.2573	1.87519	1.1886
13.375	M5A	TL	PA	1	+	+	top	12	29.3	7.951	8.04274	2.23861	413.286	1936.6	123.555	3.04412	1.91644
13.375	M5B	TL	PA	2	+	+	top	11.8	29.3	7.975	8.06654	2.17577	376.961	1868.59	124.977	3.07868	1.93747
13.375	M6A	TL	PL	1	+	+	top	11.9	29.3	7.663	7.75936	2.22222	841.765	2055.48	68.03	1.67598	1.05492
13.375	M6B	TL	PL	2	+	+	top	11.9	29.3	7.699	7.79472	2.21361	768.008	2034.46	73.0466	1.79957	1.13271
13.375	M7A	TH	PL	1	+	+	top	14.4	29.5	7.684	7.75654	2.17906	838.636	2000.73	72.6514	1.79203	1.13431
13.375	M7B	TH	PL	2	+	+	top	14.4	29.5	7.681	7.75303	2.11379	820.26	1941.16	69.9215	1.72469	1.09169
13.375	M1A	TL	PA	1	-	-	bottom	11.9	29.7	8.04	8.13161	2.10066	305.017	1757.76	138.347	3.40071	2.14333
13.375	M1B	TL	PA	2	-	-	bottom	11.9	29.6	8.037	8.12783	2.29065	337.156	1925.43	149.89	3.68651	2.32271
13.375	M2A	TL	PA	1	+	-	bottom	11.9	29.6	7.958	8.05004	2.0611	371.558	1773.89	115.445	2.83934	1.78894
13.375	M2B	TL	PA	2	+	-	bottom	11.9	29.4	7.971	8.06371	2.15738	376.26	1852.38	123.841	3.04923	1.91993
13.375	M3A	TL	PL	1	+	-	bottom	11.8	29.7	7.695	7.79333	2.11379	733.293	1940.66	69.8283	1.71632	1.08152
13.375	M3B	TL	PL	2	+	-	bottom	11.8	29.6	7.686	7.78425	2.2093	784.953	2033.62	71.4952	1.75827	1.1076
13.375	M4A	TH	PL	1	+	-	bottom	14.3	29.9	7.681	7.75512	2.05669	791.364	1885.99	68.6247	1.68851	1.06993
13.375	M4B	TH	PL	2	+	-	bottom	14.3	30	7.684	7.75885	2.18772	834.306	2006.25	73.7983	1.81472	1.15027
13.375	M5A	TL	PA	1	+	+	bottom	12	29.6	7.951	8.04521	2.21791	405.803	1914.59	123.694	3.04245	1.91728
13.375	M5B	TL	PA	2	+	+	bottom	11.8	29.6	7.975	8.06902	2.10066	360.388	1798.72	121.826	2.99604	1.88732
13.375	M6A	TL	PL	1	+	+	bottom	11.8	29.6	7.622	7.76126	2.20499	829.391	2037.94	67.9524	1.67114	1.05272
13.375	M6B	TL	PL	2	+	+	bottom	11.9	29.5	7.699	7.79696	2.0655	710.988	1894.61	68.6903	1.69036	1.06468
13.375	M7A	TH	PL	1	+	+	bottom	14.4	30	7.685	7.75942	2.23081	850.125	2045.56	75.626	1.85985	1.17912
13.375	M7B	TH	PL	2	+	+	bottom	14.4	29.9	7.682	7.75919	2.12253	809.172	1945.26	71.7177	1.76479	1.1185
14	M1A	TL	PA	1	-	-	top	11	29.3	8.034	8.13194	2.17156	316.028	1831.72	138.137	3.40082	2.13707
14	M1B	TL	PA	2	-	-	top	11.1	29.4	8.032	8.12553	2.11235	312.223	1782.57	133.275	3.27957	2.06193
14	M2A	TL	PA	1	+	-	top	11	29.3	7.95	8.04503	2.16734	396.504	1881.35	116.147	2.85944	1.79687
14	M2B	TL	PA	2	+	-	top	11	29.3	7.961	8.05389	2.01401	359.319	1740.09	109.642	2.6993	1.69623
14	M3A	TL	PL	1	+	-	top	11.1	29.3	7.687	7.78663	2.12932	750.725	1963.33	67.1117	1.65235	1.03852
14	M3B	TL	PL	2	+	-	top	11	29.3	7.695	7.79848	2.22609	762.268	2050.13	71.7416	1.76622	1.10989
14	M4A	TH	PL	1	+	-	top	13.8	29.6	7.665	7.77442	2.12253	778.636	1944.46	72.0949	1.77613	1.12323
14	M4B	TH	PL	2	+	-	top	13.7	29.5	7.682	7.74728	2.1704	852.335	2000.15	69.2457	1.70677	1.07879
14	M5A	TL	PA	1	+	+	top	11.1	29.4	7.941	8.03688	2.14868	401.228	1867.74	113.858	2.80177	1.76153
14	M5B	TL	PA	2	+	+	top	11	29.3	7.961	8.05922	2.15738	380.286	1864.32	118.918	2.92767	1.83975
14	M6A	TL	PL	1	+	+	top	11.1	29.3	7.663	7.77777	2.14868	774.498	1984.57	66.4671	1.63648	1.02855
14	M6B	TL	PL	2	+	+	top	11	29.4	7.697	7.78807	2.09627	735.49	1932.03	66.1603	1.62793	1.02333
14	M7A	TH	PL	1	+	+	top	13.8	29.5	7.689	7.76541	2.03902	764.969	1870.39	67.7705	1.67057	1.05613
14	M7B	TH	PL	2	+	+	top	13.8	29.5	7.68	7.74609	2.14433	844.767	1975.62	68.4688	1.68779	1.06701
14	M1A	TL	PA	1	-	-	bottom	11	29.6	8.035	8.13265	2.10066	304.06	1767.3	134.422	3.30396	2.07825
14	M1B	TL	PA	2	-	-	bottom	11	29.6	8.033	8.13088	2.29065	334.006	1933.44	146.46	3.59983	2.26435
14	M2A	TL	PA	1	+	-	bottom	11	29.5	7.952	8.0455	2.0611	375.533	1785.18	110.839	2.7258	1.71401
14	M2B	TL	PA	2	+	-	bottom	11	29.6	7.963	8.05638	2.15738	382.235	1863.85	118.933	2.92325	1.83877
14	M3A	TL	PL	1	+	-	bottom	11	29.5	7.685	7.78654	2.11379	744.114	1948.54	66.6432	1.63892	1.03057
14	M3B	TL	PL	2	+	-	bottom	11	29.7	7.694	7.79943	2.2093	752.819	2032.29	71.9324	1.76706	1.11187
14	M4A	TH	PL	1	+	-	bottom	13.8	29.7	7.666	7.77465	2.05669	753.195	1882.64	69.9981	1.72347	1.09027
14	M4B	TH	PL	2	+	-	bottom	13.7	29.8	7.685	7.74796	2.18772	856.235	2014.79	70.3406	1.73072	1.09498
14	M5A	TL	PA	1	+	+	bottom	11.1	29.8	7.943	8.03961	2.21791	410.325	1925.05	119.183	2.92637	1.84225
14	M5B	TL	PA	2	+	+	bottom	11	29.6	7.96	8.05993	2.10066	368.481	1811.52	116.542	2.86448	1.8018
14	M6A	TL	PL	1	+	+	bottom	11.1	29.6	7.663	7.76784	2.20499	813.423	2039.57	67.2279	1.6525	1.03964
14	M6B	TL	PL	2	+	+	bottom	11	29.7	7.695	7.78879	2.0655	721.931	1901.73	65.6818	1.61351	1.01525
14	M7A	TH	PL	1	+	+	bottom	13.8	29.9	7.69	7.76457	2.23081	837.838	2047.71	74.7275	1.83775	1.16331
14	M7B	TH	PL	2	+	+	bottom	13.8	29.8	7.681	7.74853	2.12253	829.493	1953.08	68.5344	1.68644	1.06719
14.375	M1A	TL	PA	1	-	-	top	12.7	29.3	8.03	8.10426	2.17156	341.015	1831.95	138.295	3.40935	2.14925
14.375	M1B	TL	PA	2	-	-	top	12.6	29.3	8.026	8.10733	2.11235	328.694	1779.56	134.782	3.32245	2.09406
14.375	M2A	TL	PA	1	+	-	top	12.6	29.4	7.941	8.02114	2.16734	423.23	1879.63	117	2.88248	1.81736
14.375	M2B	TL	PA	2	+	-	top	12.7	29.3	7.952	8.02668	2.01401	387.263	1740.07	109.87	2.7086	1.7075
14.375	M3A	TL	PL	1	+	-	top	12.6	29.4	7.681	7.75833	2.12932	810.11	1964.42	66.7642	1.64484	1.03705
14.375	M3B	TL	PL	2	+	-	top	12.7	29.5	7.691	7.79087	2.22609	781.464	2041.75	75.2479	1.85296	1.16887
14.375	M4A	TH	PL	1	+	-	top	15.3	29.6	7.694	7.75835	2.12253	815.107	1941.57	73.3983	1.81123	1.14903
14.375	M4B	TH	PL	2	+	-	top	15.2	29.5	7.666	7.78378	2.1704	782.582	1977.09	78.7739	1.94483	1.23311
14.375	M5A	TL	PA	1	+	+	top	12.9	29.3	7.935	8.01178	2.14868	430.458	1866.3	114.734	2.82904	1.78412
14.375	M5B	TL	PA	2	+	+	top	12.7	29.4	7.956	8.0322	2.15738	409.326	1863.46	119.438	2.94281	1.85576
14.375	M6A	TL	PL	1	+	+	top	12.7	29.6	7.662	7.80521	2.14868	726.906	1963.7	74.9715	1.8451	1.1643
14.375	M6B	TL	PL	2	+	+	top	12.7	29.4	7.682	7.78183	2.09627	752.422	1924.6	69.3097	1.7077	1.07689
14.375	M7A	TH	PL	1	+	+	top	15.3	29.6	7.686	7.75835	2.03902	782.512	1863.93	70.4632	1.7388	1.10308
14.375	M7B	TH	PL	2	+	+	top	15.3	29.6	7.668	7.74786	2.14433	845.455	1965.83	72.5428	1.79012	1.13564
14.375	M1A	TL	PA	1	-	-	bottom	12.6	29.5	8.032	8.10779	2.10066	325.874	1767.55	134.628	3.31489	2.09067
14.375	M1B	TL	PA	2	-	-	bottom	12.6	29.7	8.029	8.11002	2.29065	353.586	1929.2	148.373	3.64917	2.30299
14.375	M2A	TL	PA	1	+	-	bottom	12.6	29.5	7.942	8.02137	2.0611	401.406	1784.35	111.382	2.74253	1.72969
14.375	M2B	TL	PA	2	+	-	bottom	12.6	29.8	7.953	8.03088	2.15738	409.4	1862.33	119.643	2.9409	1.8566
14.375	M3A	TL	PL	1	+	-	bottom	12.6	29.8	7.679	7.75926	2.11379	800.339	1947.87	66.9522	1.64573	1.03895
14.375	M3B	TL	PL	2	+	-	bottom	12.7	29.9	7.692	7.79004	2.2093	775.197	2024.58	75.1552	1.84646	1.16626
14.375	M4A	TH	PL	1	+	-	bottom	15.3	30	7.693	7.75923	2.05669	785.697	1878.24	71.7956	1.76737	1.12263
14.375	M4B	TH	PL	2	+	-	bottom	15.2	29.7	7.667	7.78772	2.18772	780.184	1990.54	80.3949	1.98245	1.25778
14.375	M5A	TL	PA	1	+	+	bottom	12.9	29.6	7.938	8.01247	2.21791	442.88	1925.45	119.373	2.93838	1.85489
14.375	M5B	TL	PA	2	+	+	bottom	12.6	29.9	7.956	8.03288	2.10066	395.97	1810.23	117.099	2.87673	1.81665
14.375	M6A	TL	PL	1	+	+	bottom	12.7	29.8	7.66	7.80568	2.20499	744.483	2014.88	77.36	1.90171	1.20079
14.375	M6B	TL	PL	2	+	+	bottom	12.7	29.6	7.681	7.78229	2.0655	739.437	1894.86	68.624	1.68889	1.06572
14.375	M7A	TH	PL	1	+	+	bottom	15.3	29.7	7.684	7.75682	2.23081	860.111	2042.38	77.1123	1.90173	1.20683
14.375	M7B	TH	PL	2	+	+	bottom	15.3	29.9	7.669	7.74853	2.12253	833.792	1943.94	72.3336	1.7817	1.13138
15	M1A	TL	PA	1	-	-	top	11.2	29.4	8.021	8.11712	2.17156	328.556	1838.5	135.336	3.33052	2.09434
15	M1B	TL	PA	2	-	-	top	11.2	29.6	8.023	8.12469	2.11235	312.459	1780.51	133.985	3.29366	2.07252
15	M2A	TL	PA	1	+	-	top	11.2	29.5	7.934	8.02519	2.16734	417.083	1889.34	112.805	2.77453	1.74529
15	M2B	TL	PA	2	+	-	top	11.3	29.4	7.941	8.02898	2.01401	383.428	1750.18	105.573	2.59826	1.63417
15	M3A	TL	PL	1	+	-	top	11.3	29.3	7.667	7.77537	2.12932	772.674	1966.14	65.9898	1.62497	1.02168
15	M3B	TL	PL	2	+	-	top	11.3	29.4	7.7	7.78624	2.22609	786.348	2052.43	70.794	1.74231	1.09582
15	M4A	TH	PL	1	+	-	top	14	29.6	7.693	7.71587	2.12253	901.293	1964.17	64.1226	1.58005	0.999631
15	M4B	TH	PL	2	+	-	top	13.9	29.7	7.719	7.71727	2.1704	917.799	2008.76	65.6912	1.61759	1.0235
15	M5A	TL	PA	1	+	+	top	11.4	29.4	7.928	8.01707	2.14868	422.739	1876.04	110.524	2.7203	1.71124
15	M5B	TL	PA	2	+	+	top	11.3	29.4	7.946	8.03784	2.15738	402.077	1873.13	115.318	2.83809	1.78501
15	M6A	TL	PL	1	+	+	top	11.3	29.4	7.715	7.86775	2.14868	618.787	1948.5	81.0837	1.99555	1.2551
15	M6B	TL	PL	2	+	+	top	11.3	29.4	7.692	7.78801	2.09627	736.571	1930.37	66.8559	1.64539	1.03486
15	M7A	TH	PL	1	+	+	top	13.9	29.7	7.692	7.73659	2.03902	821.175	1879.02	64.2426	1.58192	1.00093
15	M7B	TH	PL	2	+	+	top	13.8	29.7	7.682	7.73425	2.14433	868.915	1978.97	67.0441	1.65074	1.04426
15	M1A	TL	PA	1	-	-	bottom	11.2	29.7	8.022	8.12315	2.10066	311.691	1770.54	133.071	3.26939	2.05791
15	M1B	TL	PA	2	-	-	bottom	11.2	29.8	8.023	8.12871	2.29065	335.495	1931.03	147.34	3.61797	2.27804
15	M2A	TL	PA	1	+	-	bottom	11.2	29.7	7.935	8.02921	2.0611	391.422	1790.96	108.423	2.66382	1.67673
15	M2B	TL	PA	2	+	-	bottom	11.3	29.6	7.943	8.03477	2.15738	404.696	1873.49	115.055	2.82852	1.78015
15	M3A	TL	PL	1	+	-	bottom	11.2	29.7	7.666	7.78638	2.11379	744.161	1946.61	67.3728	1.65527	1.0419
15	M3B	TL	PL	2	+	-	bottom	11.3	29.6	7.699	7.78849	2.2093	775.057	2035.02	70.8821	1.74256	1.0967
15	M4A	TH	PL	1	+	-	bottom	14	29.9	7.694	7.71656	2.05669	869.915	1900.95	62.581	1.53934	0.974807
15	M4B	TH	PL	2	+	-	bottom	13.9	29.9	7.722	7.71948	2.18772	919.099	2023.42	66.8112	1.64323	1.04039
15	M5A	TL	PA	1	+	+	bottom	11.4	29.7	7.929	8.01955	2.21791	432.935	1934.52	115.415	2.83599	1.78575
15	M5B	TL	PA	2	+	+	bottom	11.3	29.4	7.945	8.03784	2.10066	391.236	1822.62	112.209	2.76157	1.73688
15	M6A	TL	PL	1	+	+	bottom	11.3	29.7	7.716	7.87023	2.20499	630.12	1997.86	84.1929	2.06865	1.30234
15	M6B	TL	PL	2	+	+	bottom	11.3	29.7	7.692	7.79404	2.0655	713.494	1898.21	67.1218	1.64921	1.03828
15	M7A	TH	PL	1	+	+	bottom	13.9	29.8	7.692	7.73857	2.23081	894.681	2057.37	70.8231	1.74293	1.10316
15	M7B	TH	PL	2	+	+	bottom	13.8	30	7.682	7.7367	2.12253	853.232	1956.44	67.1107	1.64946	1.04445
15.375	M1A	TL	PA	1	-	-	top	13	29.4	8.017	8.10585	2.17156	339.422	1826.91	140.324	3.45835	2.18214
15.375	M1B	TL	PA	2	-	-	top	12.9	29.5	8.025	8.11267	2.11235	323.619	1771.38	138.005	3.39896	2.14495
15.375	M2A	TL	PA	1	+	-	top	12.9	29.4	7.924	8.01553	2.16734	429.739	1880.09	116.851	2.8796	1.8166
15.375	M2B	TL	PA	2	+	-	top	13	29.3	7.928	8.01755	2.01401	396.862	1742.42	108.963	2.687	1.69487
15.375	M3A	TL	PL	1	+	-	top	12.9	29.4	7.672	7.74243	2.12932	843.748	1968.27	65.2287	1.60745	1.01406
15.375	M3B	TL	PL	2	+	-	top	13	29.4	7.682	7.78528	2.22609	793.873	2042.53	74.9928	1.84823	1.16619
15.375	M4A	TH	PL	1	+	-	top	15.6	29.6	7.636	7.76701	2.12253	798.482	1936.41	75.5226	1.86433	1.18348
15.375	M4B	TH	PL	2	+	-	top	15.5	29.7	7.636	7.74223	2.1704	868.11	1990.6	73.2208	1.80619	1.14669
15.375	M5A	TL	PA	1	+	+	top	13.3	29.4	7.917	7.99459	2.14868	450.212	1871.66	112.544	2.77449	1.75168
15.375	M5B	TL	PA	2	+	+	top	12.9	29.4	7.937	8.02434	2.15738	417.99	1866.16	118.363	2.91684	1.8401
15.375	M6A	TL	PL	1	+	+	top	13.1	29.4	7.765	7.87917	2.14868	605.073	1931.08	88.3444	2.1775	1.37422
15.375	M6B	TL	PL	2	+	+	top	13.1	29.5	7.683	7.77904	2.09627	758.432	1922.86	70.0138	1.7247	1.08882
15.375	M7A	TH	PL	1	+	+	top	15.5	29.6	7.657	7.75598	2.03902	787.727	1863.64	70.5963	1.74251	1.10591
15.375	M7B	TH	PL	2	+	+	top	15.5	29.7	7.654	7.73874	2.14433	865.019	1967.62	71.7962	1.77104	1.12438
15.375	M1A	TL	PA	1	-	-	bottom	13	29.7	8.022	8.1083	2.10066	325.048	1761.49	136.999	3.3706	2.12884
15.375	M1B	TL	PA	2	-	-	bottom	12.9	29.8	8.029	8.11513	2.29065	348.64	1921.36	151.573	3.7267	2.35404
15.375	M2A	TL	PA	1	+	-	bottom	12.9	29.8	7.927	8.02175	2.0611	400.348	1779.46	113.218	2.78368	1.75836
15.375	M2B	TL	PA	2	+	-	bottom	13	29.7	7.935	8.01671	2.15738	425.53	1867.56	117.631	2.89409	1.82788
15.375	M3A	TL	PL	1	+	-	bottom	12.9	29.7	7.68	7.74136	2.11379	838.227	1952.84	65.0013	1.5991	1.00978
15.375	M3B	TL	PL	2	+	-	bottom	13	29.7	7.684	7.78598	2.2093	784.991	2025.23	74.9872	1.84492	1.16524
15.375	M4A	TH	PL	1	+	-	bottom	15.6	30	7.637	7.7679	2.05669	769.643	1873.16	73.8687	1.81904	1.1562
15.375	M4B	TH	PL	2	+	-	bottom	15.5	30.1	7.639	7.74312	2.18772	871.082	2004.57	74.5561	1.83462	1.16622
15.375	M5A	TL	PA	1	+	+	bottom	13.3	29.7	7.92	7.99528	2.21791	463.216	1931.01	117.093	2.88165	1.82111
15.375	M5B	TL	PA	2	+	+	bottom	12.9	29.7	7.938	8.02504	2.10066	405.05	1813.37	115.988	2.85343	1.80185
15.375	M6A	TL	PL	1	+	+	bottom	13.1	29.8	7.768	7.88009	2.20499	618.144	1980.03	91.6071	2.25272	1.42354
15.375	M6B	TL	PL	2	+	+	bottom	13.1	29.8	7.688	7.77973	2.0655	744.459	1892.61	69.4958	1.70898	1.07994
15.375	M7A	TH	PL	1	+	+	bottom	15.5	30	7.66	7.75686	2.23081	859.054	2039.68	78.125	1.92362	1.22241
15.375	M7B	TH	PL	2	+	+	bottom	15.5	30	7.656	7.7394	2.12253	853.102	1945.73	71.5895	1.7627	1.12015
16	M1A	TL	PA	1	-	-	top	12.1	28.7	8.023	8.11604	2.17156	331.872	1835.32	137.253	3.3932	2.13223
16	M1B	TL	PA	2	-	-	top	12	28.7	8.03	8.12265	2.11235	316.885	1780.61	134.691	3.32957	2.09186
16	M2A	TL	PA	1	+	-	top	12	28.7	7.931	8.02367	2.16734	422.1	1888.44	113.735	2.81152	1.76638
16	M2B	TL	PA	2	+	-	top	12	28.7	7.934	8.02367	2.01401	391.512	1751.59	105.493	2.60778	1.63838
16	M3A	TL	PL	1	+	-	top	11.9	28.8	7.653	7.79002	2.12932	749.323	1959.72	68.8137	1.69998	1.06822
16	M3B	TL	PL	2	+	-	top	11.9	28.7	7.699	7.8004	2.22609	764.409	2046.7	73.4374	1.81521	1.14022
16	M4A	TH	PL	1	+	-	top	14.5	29	7.706	7.76826	2.12253	795.818	1945.32	72.0244	1.78203	1.12633
16	M4B	TH	PL	2	+	-	top	14.4	29	7.679	7.75192	2.1704	847.529	1996.59	70.9255	1.75463	1.10878
16	M5A	TL	PA	1	+	+	top	12.2	28.7	7.915	8.00698	2.14868	437.11	1879.17	109.743	2.71334	1.70534
16	M5B	TL	PA	2	+	+	top	11.8	28.7	7.94	8.04569	2.15738	396.515	1868.92	117.513	2.90441	1.82406
16	M6A	TL	PL	1	+	+	top	12	28.7	7.795	7.92116	2.14868	544.492	1923.81	91.5036	2.26197	1.42112
16	M6B	TL	PL	2	+	+	top	12	28.7	7.693	7.7992	2.09627	721.629	1925.43	69.1584	1.7096	1.07408
16	M7A	TH	PL	1	+	+	top	14.4	29	7.693	7.76243	2.03902	774.892	1870.22	68.0647	1.68386	1.06406
16	M7B	TH	PL	2	+	+	top	14.4	29	7.676	7.75893	2.14433	822.718	1969.68	71.1084	1.75916	1.11164
16	M1A	TL	PA	1	-	-	bottom	12.1	29.1	8.026	8.11873	2.10066	317.362	1768.8	134.324	3.31343	2.08498
16	M1B	TL	PA	2	-	-	bottom	12	29.2	8.031	8.12381	2.29065	341.963	1930.5	148.104	3.65101	2.29774
16	M2A	TL	PA	1	+	-	bottom	12	29	7.932	8.02436	2.0611	399.262	1791.27	108.799	2.68505	1.68868
16	M2B	TL	PA	2	+	-	bottom	12	29.1	7.934	8.0246	2.15738	417.828	1876.31	114.287	2.81891	1.77347
16	M3A	TL	PL	1	+	-	bottom	11.8	28.9	7.652	7.78615	2.11379	750.183	1946.73	67.647	1.6701	1.0496
16	M3B	TL	PL	2	+	-	bottom	11.9	29.1	7.699	7.8031	2.2093	751.602	2028.18	73.8995	1.8226	1.14644
16	M4A	TH	PL	1	+	-	bottom	14.5	29.4	7.709	7.76915	2.05669	767.088	1881.92	70.4557	1.73909	1.10067
16	M4B	TH	PL	2	+	-	bottom	14.5	29.5	7.681	7.75185	2.18772	852.238	2009.97	72.4753	1.78788	1.13192
16	M5A	TL	PA	1	+	+	bottom	12.2	29	7.916	8.00767	2.21791	449.71	1938.74	114.183	2.81841	1.77322
16	M5B	TL	PA	2	+	+	bottom	11.8	29.1	7.941	8.04308	2.10066	387.256	1817.25	114.625	2.8268	1.77777
16	M6A	TL	PL	1	+	+	bottom	12	28.9	7.794	7.92162	2.20499	557.614	1973.86	94.4151	2.33136	1.46573
16	M6B	TL	PL	2	+	+	bottom	12	28.9	7.694	7.79789	2.0655	712.285	1896.32	68.2199	1.68453	1.05907
16	M7A	TH	PL	1	+	+	bottom	14.4	29.4	7.692	7.76332	2.23081	844.979	2046.81	75.3244	1.85906	1.17635
16	M7B	TH	PL	2	+	+	bottom	14.4	29.5	7.676	7.76004	2.12253	809.441	1946.73	71.2633	1.75779	1.11264
16.4167	M1A	TL	PA	1	-	-	top	12	28.5	8.025	8.11689	2.17156	331.628	1837.4	136.528	3.3787	2.12122
16.4167	M1B	TL	PA	2	-	-	top	12	28.6	8.033	8.12242	2.11235	317.348	1781.54	134.383	3.32377	2.08748
16.4167	M2A	TL	PA	1	+	-	top	12	28.6	7.933	8.02344	2.16734	422.676	1889.24	113.463	2.80635	1.76251
16.4167	M2B	TL	PA	2	+	-	top	12	28.5	7.933	8.02321	2.01401	392.589	1753.12	104.991	2.59825	1.63124
16.4167	M3A	TL	PL	1	+	-	top	11.9	28.7	7.694	7.78979	2.12932	750.223	1960.24	68.638	1.69658	1.0657
16.4167	M3B	TL	PL	2	+	-	top	12	28.7	7.705	7.7992	2.22609	767.022	2046.55	73.5087	1.81714	1.14164
16.4167	M4A	TH	PL	1	+	-	top	14.6	28.8	7.697	7.76663	2.12253	800.377	1946.23	71.7339	1.77715	1.1227
16.4167	M4B	TH	PL	2	+	-	top	14.6	28.9	7.699	7.74933	2.1704	854.196	1996.82	70.8854	1.75509	1.10915
16.4167	M5A	TL	PA	1	+	+	top	12.2	28.5	7.917	8.00652	2.14868	438.293	1880.73	109.218	2.70335	1.69786
16.4167	M5B	TL	PA	2	+	+	top	11.9	28.6	7.953	8.04417	2.15738	398.491	1869.57	117.322	2.90154	1.82196
16.4167	M6A	TL	PL	1	+	+	top	12.1	28.5	7.828	7.91945	2.14868	547.803	1924.98	91.1311	2.25546	1.41629
16.4167	M6B	TL	PL	2	+	+	top	12.1	28.6	7.706	7.79777	2.09627	724.968	1925.81	69.0495	1.708	1.07291
16.4167	M7A	TH	PL	1	+	+	top	14.5	28.8	7.691	7.76081	2.03902	779.33	1871.09	67.7902	1.67925	1.06063
16.4167	M7B	TH	PL	2	+	+	top	14.6	28.8	7.687	7.75612	2.14433	830.18	1970.44	70.8898	1.75624	1.10949
16.4167	M1A	TL	PA	1	-	-	bottom	12	28.9	8.028	8.11958	2.10066	317.131	1770.85	133.619	3.2994	2.07435
16.4167	M1B	TL	PA	2	-	-	bottom	12	29	8.033	8.12335	2.29065	342.954	1932.5	147.423	3.63825	2.28816
16.4167	M2A	TL	PA	1	+	-	bottom	12	28.9	7.933	8.02413	2.0611	399.809	1792.05	108.54	2.68014	1.68502
16.4167	M2B	TL	PA	2	+	-	bottom	12	28.9	7.933	8.02413	2.15738	418.968	1877.93	113.742	2.80858	1.76576
16.4167	M3A	TL	PL	1	+	-	bottom	11.9	29	7.689	7.78518	2.11379	751.842	1946.07	67.887	1.67524	1.05339
16.4167	M3B	TL	PL	2	+	-	bottom	12	29	7.706	7.80166	2.2093	755.082	2028.58	73.7821	1.82087	1.14518
16.4167	M4A	TH	PL	1	+	-	bottom	14.6	29.2	7.698	7.76751	2.05669	771.484	1882.83	70.1711	1.73432	1.09715
16.4167	M4B	TH	PL	2	+	-	bottom	14.6	29.2	7.679	7.75	2.18772	858.09	2011.41	72.0002	1.77953	1.12575
16.4167	M5A	TL	PA	1	+	+	bottom	12.2	28.9	7.917	8.00744	2.21791	450.316	1939.55	113.909	2.81321	1.76935
16.4167	M5B	TL	PA	2	+	+	bottom	11.9	28.8	7.95	8.0411	2.10066	390.263	1819.52	113.897	2.81372	1.76805
16.4167	M6A	TL	PL	1	+	+	bottom	12.1	28.9	7.829	7.92037	2.20499	559.568	1973.69	94.496	2.33356	1.4674
16.4167	M6B	TL	PL	2	+	+	bottom	12.1	28.9	7.762	7.79669	2.0655	714.718	1896.18	68.2859	1.68631	1.06039
16.4167	M7A	TH	PL	1	+	+	bottom	14.5	29.1	7.691	7.76147	2.23081	850.804	2048.3	74.8307	1.85037	1.16992
16.4167	M7B	TH	PL	2	+	+	bottom	14.6	29.2	7.687	7.757	2.12253	817.745	1948.01	70.8649	1.75147	1.108
17	M1A	TL	PA	1	-	-	top	12.3	28.1	8.042	8.10498	2.03459	321.304	1725.46	125.029	3.10188	1.9457
17	M1B	TL	PA	2	-	-	top	12.3	28.3	8.051	8.11426	1.92753	295.972	1625.12	120.854	2.99498	1.88002
17	M2A	TL	PA	1	+	-	top	12.3	28.3	7.952	8.02422	1.95893	381.444	1702.22	102.883	2.54963	1.60047
17	M2B	TL	PA	2	+	-	top	12.3	28.2	7.949	8.01693	2.1269	423.284	1856.72	110.101	2.73001	1.71307
17	M3A	TL	PL	1	+	-	top	12.1	28.2	7.701	7.72794	1.93652	797.202	1800.21	54.4592	1.35007	0.846846
17	M3B	TL	PL	2	+	-	top	12.2	28.4	7.698	7.72369	2.10066	874.189	1955.05	59.0607	1.46268	0.918318
17	M4A	TH	PL	1	+	-	top	14.7	28.5	7.736	7.67024	2.06991	992.773	1929.85	56.7997	1.40984	0.889899
17	M4B	TH	PL	2	+	-	top	14.7	28.5	7.641	7.64923	1.99464	1006.84	1864.76	52.292	1.29795	0.819276
17	M5A	TL	PA	1	+	+	top	12.4	28.2	7.914	7.98388	1.95893	423.918	1722.03	94.9935	2.35565	1.47845
17	M5B	TL	PA	2	+	+	top	12.1	28.2	7.937	7.96647	2.06991	468.658	1832.91	96.0326	2.3807	1.49332
17	M6A	TL	PL	1	+	+	top	12.2	28.2	7.679	7.67731	1.97234	920.124	1847.82	49.9384	1.23812	0.77677
17	M6B	TL	PL	2	+	+	top	12.3	28.2	7.692	7.71147	1.95893	840.723	1825.2	53.5671	1.32822	0.833456
17	M7A	TH	PL	1	+	+	top	14.7	28.4	7.694	7.67703	2.14868	1014.6	2002.5	59.7308	1.48347	0.936036
17	M7B	TH	PL	2	+	+	top	14.7	28.5	7.689	7.67549	2.11379	1001.08	1969.68	58.6773	1.45644	0.919317
17	M1A	TL	PA	1	-	-	bottom	12.3	28.4	8.043	8.10566	2.10066	330.611	1780.45	130.106	3.22248	2.02357
17	M1B	TL	PA	2	-	-	bottom	12.2	28.6	8.05	8.11626	2.29065	350.741	1938.49	145.265	3.59359	2.25779
17	M2A	TL	PA	1	+	-	bottom	12.2	28.7	7.95	8.03171	2.0611	392.784	1787.54	110.508	2.73226	1.71723
17	M2B	TL	PA	2	+	-	bottom	12.3	28.4	7.948	8.01915	2.15738	426.369	1881.4	112.651	2.79014	1.75208
17	M3A	TL	PL	1	+	-	bottom	12.1	28.7	7.701	7.73262	2.11379	858.63	1963.96	60.7475	1.50181	0.943716
17	M3B	TL	PL	2	+	-	bottom	12.1	28.6	7.695	7.73769	2.2093	887.334	2052.61	64.0886	1.58529	0.995822
17	M4A	TH	PL	1	+	-	bottom	14.7	28.8	7.732	7.67089	2.05669	982.984	1916.08	56.8648	1.40895	0.890285
17	M4B	TH	PL	2	+	-	bottom	14.7	28.6	7.64	7.6512	2.18772	1099.58	2046.63	57.7835	1.43341	0.9051
17	M5A	TL	PA	1	+	+	bottom	12.3	28.5	7.917	7.98406	2.21791	479.906	1954.1	108.17	2.67767	1.68205
17	M5B	TL	PA	2	+	+	bottom	12.1	28.5	7.934	7.96893	2.10066	471.745	1857.73	98.5588	2.43929	1.53173
17	M6A	TL	PL	1	+	+	bottom	12.2	28.4	7.677	7.676	2.20499	1032.12	2068.2	55.9817	1.38642	0.870442
17	M6B	TL	PL	2	+	+	bottom	12.2	28.3	7.689	7.7111	2.0655	886.943	1926.09	56.3939	1.3974	0.877019
17	M7A	TH	PL	1	+	+	bottom	14.7	28.6	7.692	7.67921	2.23081	1046.96	2078.52	62.5942	1.55275	0.980454
17	M7B	TH	PL	2	+	+	bottom	14.7	28.7	7.686	7.67768	2.12253	998.671	1976.49	59.4466	1.4738	0.93093
17.4167	M1A	TL	PA	1	-	-	top	11.9	28.1	8.039	8.0943	2.03459	330.295	1735.63	120.851	2.99702	1.87851
17.4167	M1B	TL	PA	2	-	-	top	11.9	28.3	8.048	8.09476	1.92753	311.508	1640	114.838	2.84478	1.78439
17.4167	M2A	TL	PA	1	+	-	top	11.9	28.1	7.957	8.00413	1.95893	402.087	1716.72	97.1223	2.40856	1.50967
17.4167	M2B	TL	PA	2	+	-	top	11.9	28.2	7.95	7.99905	2.1269	442.861	1869.62	104.783	2.59713	1.62846
17.4167	M3A	TL	PL	1	+	-	top	11.7	28.2	7.655	7.69195	1.93652	869.272	1812.06	49.693	1.23144	0.771855
17.4167	M3B	TL	PL	2	+	-	top	11.8	28.2	7.651	7.69256	2.10066	942.98	1967.03	54.225	1.34388	0.842484
17.4167	M4A	TH	PL	1	+	-	top	14.6	28.5	7.622	7.69591	2.06991	931.554	1922.43	59.8013	1.48415	0.93661
17.4167	M4B	TH	PL	2	+	-	top	14.6	28.4	7.601	7.68694	1.99464	917.864	1854.66	56.3849	1.40019	0.883305
17.4167	M5A	TL	PA	1	+	+	top	12	28.1	7.918	7.94983	1.95893	462.484	1741.27	87.2666	2.16436	1.35686
17.4167	M5B	TL	PA	2	+	+	top	11.7	28.1	7.897	7.87574	2.06991	589.797	1876.38	78.3851	1.94352	1.21773
17.4167	M6A	TL	PL	1	+	+	top	11.8	28.2	7.605	7.68902	1.97234	892.383	1846.38	50.4863	1.25122	0.784397
17.4167	M6B	TL	PL	2	+	+	top	11.9	28.1	7.641	7.70885	1.95893	845.083	1828.11	52.4016	1.29952	0.814531
17.4167	M7A	TH	PL	1	+	+	top	14.6	28.4	7.63	7.67643	2.14868	1015.65	2003.19	59.4444	1.47616	0.931233
17.4167	M7B	TH	PL	2	+	+	top	14.6	28.5	7.627	7.6784	2.11379	993.52	1969.27	58.8367	1.46021	0.921503
17.4167	M1A	TL	PA	1	-	-	bottom	11.9	28.5	8.04	8.09698	2.10066	337.796	1789.01	126.494	3.1301	1.96478
17.4167	M1B	TL	PA	2	-	-	bottom	11.9	28.8	8.05	8.10121	2.29065	364.234	1950.28	140.206	3.46367	2.17646
17.4167	M2A	TL	PA	1	+	-	bottom	11.9	28.5	7.964	7.99974	2.0611	427.112	1808.23	102.203	2.52902	1.58748
17.4167	M2B	TL	PA	2	+	-	bottom	11.9	28.6	7.952	8.01765	2.15738	426.951	1884.43	111.249	2.75134	1.72764
17.4167	M3A	TL	PL	1	+	-	bottom	11.7	28.5	7.66	7.70149	2.11379	926.302	1976.26	55.7817	1.38007	0.86595
17.4167	M3B	TL	PL	2	+	-	bottom	11.8	28.5	7.665	7.69502	2.2093	984.642	2068.15	57.7319	1.42844	0.896472
17.4167	M4A	TH	PL	1	+	-	bottom	14.6	28.9	7.623	7.69854	2.05669	917.293	1907.63	60.2447	1.49163	0.942657
17.4167	M4B	TH	PL	2	+	-	bottom	14.6	28.8	7.602	7.68781	2.18772	1003.34	2034.82	62.5516	1.54967	0.978992
17.4167	M5A	TL	PA	1	+	+	bottom	12	28.4	7.917	7.95051	2.21791	522.953	1974.51	99.7955	2.47103	1.55081
17.4167	M5B	TL	PA	2	+	+	bottom	11.7	28.5	7.898	7.87489	2.10066	598.374	1903.1	80.077	1.98115	1.24311
17.4167	M6A	TL	PL	1	+	+	bottom	11.8	28.4	7.602	7.68771	2.20499	1001.02	2066.63	56.5973	1.40114	0.879021
17.4167	M6B	TL	PL	2	+	+	bottom	11.9	28.4	7.639	7.7113	2.0655	884.715	1927.09	55.9352	1.38488	0.86898
17.4167	M7A	TH	PL	1	+	+	bottom	14.6	28.8	7.63	7.67555	2.23081	1054.7	2079.45	62.144	1.53957	0.972613
17.4167	M7B	TH	PL	2	+	+	bottom	14.6	28.9	7.63	7.67927	2.12253	993.138	1975.74	59.6879	1.47785	0.933945
19	M1A	TL	PA	1	-	-	top	11.3	28.2	8.023	8.10237	2.2351	355.445	1911.89	132.847	3.29088	2.06117
19	M1B	TL	PA	2	-	-	top	11.3	28.3	8.03	8.1026	1.99464	315.737	1699.92	118.453	2.93273	1.83752
19	M2A	TL	PA	1	+	-	top	11.4	28.2	7.928	8.01073	1.97234	397.218	1728.87	97.65	2.4192	1.51549
19	M2B	TL	PA	2	+	-	top	11.3	28.2	7.945	8.00669	2.02574	412.408	1779.66	99.2076	2.45757	1.53925
19	M3A	TL	PL	1	+	-	top	11.3	28.2	7.615	7.69661	2.20499	978.196	2067.1	56.428	1.39784	0.875505
19	M3B	TL	PL	2	+	-	top	11.3	28.2	7.619	7.69838	2.07431	915.577	1942.68	53.2485	1.31907	0.826173
19	M4A	TH	PL	1	+	-	top	14.3	28.6	7.647	7.69961	2.04344	909.394	1897.46	58.9938	1.46271	0.922831
19	M4B	TH	PL	2	+	-	top	14.3	28.5	7.638	7.69063	2.10504	958.757	1958.68	59.5147	1.47649	0.931191
19	M5A	TL	PA	1	+	+	top	11.3	28.2	7.881	7.95885	1.96788	452.72	1749.84	87.371	2.16436	1.3556
19	M5B	TL	PA	2	+	+	top	11.2	28.3	7.803	7.88235	2.0213	564.349	1831.11	76.5454	1.895	1.18711
19	M6A	TL	PL	1	+	+	top	11.3	28.2	7.613	7.69484	1.94549	865.501	1821.51	49.5214	1.22675	0.768345
19	M6B	TL	PL	2	+	+	top	11.3	28.2	7.634	7.7161	1.97681	834.929	1845.33	52.6865	1.30515	0.817453
19	M7A	TH	PL	1	+	+	top	14.3	28.4	7.626	7.67989	2.17473	1018.06	2028.18	59.9851	1.48902	0.93876
19	M7B	TH	PL	2	+	+	top	14.2	28.5	7.629	7.68302	2.19204	1017.33	2043.65	60.788	1.50789	0.950801
19	M1A	TL	PA	1	-	-	bottom	11.3	28.3	8.028	8.10437	2.10066	331.466	1791.89	125.372	3.10405	1.94486
19	M1B	TL	PA	2	-	-	bottom	11.3	28.3	8.03	8.10791	2.29065	358.928	1956.25	137.993	3.41653	2.14065
19	M2A	TL	PA	1	+	-	bottom	11.3	28.3	7.928	8.00692	2.0611	419.211	1810.73	101.226	2.50622	1.57029
19	M2B	TL	PA	2	+	-	bottom	11.3	28.3	7.945	8.02464	2.15738	419.599	1887.88	109.934	2.72181	1.70537
19	M3A	TL	PL	1	+	-	bottom	11.3	28.3	7.623	7.7057	2.11379	916.091	1977.63	55.2544	1.36803	0.857145
19	M3B	TL	PL	2	+	-	bottom	11.3	28.3	7.619	7.70039	2.2093	970.544	2069.69	57.1232	1.41429	0.886136
19	M4A	TH	PL	1	+	-	bottom	14.3	28.6	7.648	7.70137	2.05669	911.42	1909.39	59.6046	1.47785	0.932385
19	M4B	TH	PL	2	+	-	bottom	14.3	28.8	7.638	7.69129	2.18772	993.49	2035.24	62.3582	1.54432	0.975003
19	M5A	TL	PA	1	+	+	bottom	11.3	28.3	7.88	7.95908	2.21791	510.866	1976.46	98.966	2.45027	1.53523
19	M5B	TL	PA	2	+	+	bottom	11.3	28.4	7.8	7.87958	2.10066	590.855	1904.32	79.5853	1.96936	1.23436
19	M6A	TL	PL	1	+	+	bottom	11.3	28.4	7.612	7.69353	2.20499	984.436	2067.29	56.2925	1.39297	0.873093
19	M6B	TL	PL	2	+	+	bottom	11.3	28.4	7.637	7.71834	2.0655	867.072	1927.86	55.5814	1.37538	0.862065
19	M7A	TH	PL	1	+	+	bottom	14.3	28.5	7.626	7.67835	2.23081	1047.95	2081.24	61.4765	1.52516	0.961886
19	M7B	TH	PL	2	+	+	bottom	14.3	29	7.629	7.68296	2.12253	982.288	1975.69	59.6544	1.47563	0.932278
[truncated: 12 more columns]

## Sheet: Appendicularian Counts
Animal counts per L
						Date	2014-06-11	2014-06-12	2014-06-13	2014-06-14	2014-06-15	2014-06-16	2014-06-17	2014-06-18	2014-06-19	2014-06-20	2014-06-21	2014-06-22	2014-06-23	2014-06-24	2014-06-25	2014-06-26	2014-06-27	2014-06-28	2017-06-30		Mesocosm	date	Animals.per.L	temperature	pH	Code
Mesocosm	Temperature	pH	Replicate	Nutrients	Appendicularians	day	0	1	2	3	4	5	6	7	8	9	10	11	12	13	14	15	16	17	19		M5A	1	10.2	TL	PA	TL PA
M1A	TL	PA	1	-	-		0	0	0	0	0.05	0.1	0.05	0	0.15	0.3	1.5	2.7	3.45	4.2	4.475	4.75	9.775	14.8	NA		M5A	2	2	TL	PA	TL PA
M1B	TL	PA	2	-	-		0.1	0.1	0.05	0	0.05	0.1	0.1	0.1	0.5	0.9	1.6	2.3	2.75	3.2	2.925	2.65	12.525	22.4	NA		M5A	3	1.66667	TL	PA	TL PA
M2A	TL	PA	1	+	-		0.2	0	0	0	0	0	0.05	0.1	0.1	0.1	0.65	1.2	1.1	1	0.85	0.7	1.9	3.1	NA		M5A	4	3.2	TL	PA	TL PA
M2B	TL	PA	2	+	-		0.1	0	0	0	0	0	0	0	0.2	0.4	0.35	0.3	0.65	1	0.875	0.75	1.175	1.6	NA		M5A	5	2.5	TL	PA	TL PA
M3A	TL	PL	1	+	-		0	0	0.05	0.1	0.1	0.1	0.05	0	0.05	0.1	0.05	0	0.3	0.6	0.55	0.5	1.25	2	NA		M5A	6	3.3	TL	PA	TL PA
M3B	TL	PL	2	+	-		0.1	0.1	0.1	0.1	0.05	0	0	0	0.05	0.1	0.35	0.6	0.7	0.8	0.75	0.7	0.6	0.5	NA		M5A	7	2.33333	TL	PA	TL PA
M4A	TH	PL	1	+	-		0.1	0	0	0	0	0	0.4	0.8	1.55	2.3	2.65	3	8.6	14.2	14.2	NA	NA	1.3	NA		M5A	8	2.8	TL	PA	TL PA
M4B	TH	PL	2	+	-		0.3	0	0.05	0.1	0.05	0	0.2	0.4	0.35	0.3	0.75	1.2	1.35	1.5	1.5	NA	NA	3.3	NA		M5A	9	8	TL	PA	TL PA
M5A	TL	PA	1	+	+		10.2	2	1.66667	3.2	2.5	3.3	2.33333	2.8	8	2.5	10	4.7	3.66667	7.9	10	5.95	8	4.9	1.66667		M5A	10	2.5	TL	PA	TL PA
M5B	TL	PA	2	+	+		10.2	5	1.83333	3.2	2.16667	3.3	3.5	2.9	4	1.8	11	3.4	4.33333	5.5	6.5	5.65	5	5.1	7		M5A	11	10	TL	PA	TL PA
M6B	TL	PL	1	+	+		10.1	2.9	3.16667	3.6	2.66667	3.3	3.33333	2.9	21	5.8	10	10.5	5	7.6	11.3333	11	10	7.5	0.666667		M5A	12	4.7	TL	PA	TL PA
M6A	TL	PL	2	+	+		10	2.3	1.66667	2.1	2	2.2	0.5	1.1	1.5	1.7	5	5.7	4.66667	4.9	5	4.85	9	5.2	13.8333		M5A	13	3.66667	TL	PA	TL PA
M7A	TH	PL	1	+	+		10	4.3	2.16667	2.9	3.16667	2.7	4	7.1	21	29.1	25	28.1	58	57	56	31.8333	7.66667	1.5	1.33333		M5A	14	7.9	TL	PA	TL PA
M7B	TH	PL	2	+	+		10.3	2.4	1.66667	2.2	2.16667	3.1	3	8.2	16	18.7	34	29.1	60	54.5	49	38.25	27.5	18.4	28.1667		M5A	15	10	TL	PA	TL PA
																											M5A	16	5.95	TL	PA	TL PA
M.= Mesocosm																											M5A	17	8	TL	PA	TL PA
Density= Animal count per L																											M5A	18	4.9	TL	PA	TL PA
																											M5A	19	1.66667	TL	PA	TL PA
TL= Temperature low, ambient fjord temperature																											M5B	1	10.2	TL	PA	TL PA
TH= targeted temperature +3C relative to TL																											M5B	2	5	TL	PA	TL PA
PA= Ambient pH																											M5B	3	1.83333	TL	PA	TL PA
PL= low pH																											M5B	4	3.2	TL	PA	TL PA
																											M5B	5	2.16667	TL	PA	TL PA
																											M5B	6	3.3	TL	PA	TL PA
																											M5B	7	3.5	TL	PA	TL PA
																											M5B	8	2.9	TL	PA	TL PA
																											M5B	9	4	TL	PA	TL PA
																											M5B	10	1.8	TL	PA	TL PA
																											M5B	11	11	TL	PA	TL PA
																											M5B	12	3.4	TL	PA	TL PA
																											M5B	13	4.33333	TL	PA	TL PA
																											M5B	14	5.5	TL	PA	TL PA
																											M5B	15	6.5	TL	PA	TL PA
																											M5B	16	5.65	TL	PA	TL PA
																											M5B	17	5	TL	PA	TL PA
																											M5B	18	5.1	TL	PA	TL PA
																											M5B	19	7	TL	PA	TL PA
																											M6A	1	10.1	TL	PL	TL PL
																											M6A	2	2.9	TL	PL	TL PL
																											M6A	3	3.16667	TL	PL	TL PL
																											M6A	4	3.6	TL	PL	TL PL
																											M6A	5	2.66667	TL	PL	TL PL
																											M6A	6	3.3	TL	PL	TL PL
																											M6A	7	3.33333	TL	PL	TL PL
																											M6A	8	2.9	TL	PL	TL PL
																											M6A	9	21	TL	PL	TL PL
																											M6A	10	5.8	TL	PL	TL PL
																											M6A	11	10	TL	PL	TL PL
																											M6A	12	10.5	TL	PL	TL PL
																											M6A	13	5	TL	PL	TL PL
																											M6A	14	7.6	TL	PL	TL PL
																											M6A	15	11.3333	TL	PL	TL PL
																											M6A	16	11	TL	PL	TL PL
																											M6A	17	10	TL	PL	TL PL
																											M6A	18	7.5	TL	PL	TL PL
																											M6A	19	0.666667	TL	PL	TL PL
																											M6B	1	10	TL	PL	TL PL
																											M6B	2	2.3	TL	PL	TL PL
																											M6B	3	1.66667	TL	PL	TL PL
																											M6B	4	2.1	TL	PL	TL PL
																											M6B	5	2	TL	PL	TL PL
																											M6B	6	2.2	TL	PL	TL PL
																											M6B	7	0.5	TL	PL	TL PL
																											M6B	8	1.1	TL	PL	TL PL
																											M6B	9	1.5	TL	PL	TL PL
																											M6B	10	1.7	TL	PL	TL PL
																											M6B	11	5	TL	PL	TL PL
																											M6B	12	5.7	TL	PL	TL PL
																											M6B	13	4.66667	TL	PL	TL PL
																											M6B	14	4.9	TL	PL	TL PL
																											M6B	15	5	TL	PL	TL PL
																											M6B	16	4.85	TL	PL	TL PL
																											M6B	17	9	TL	PL	TL PL
																											M6B	18	5.2	TL	PL	TL PL
																											M6B	19	13.8333	TL	PL	TL PL
																											M7A	1	10	TH	PL	TH PL
																											M7A	2	4.3	TH	PL	TH PL
																											M7A	3	2.16667	TH	PL	TH PL
																											M7A	4	2.9	TH	PL	TH PL
																											M7A	5	3.16667	TH	PL	TH PL
																											M7A	6	2.7	TH	PL	TH PL
																											M7A	7	4	TH	PL	TH PL
																											M7A	8	7.1	TH	PL	TH PL
																											M7A	9	21	TH	PL	TH PL
																											M7A	10	29.1	TH	PL	TH PL
																											M7A	11	25	TH	PL	TH PL
																											M7A	12	28.1	TH	PL	TH PL
																											M7A	13	58	TH	PL	TH PL
																											M7A	14	57	TH	PL	TH PL
																											M7A	15	56	TH	PL	TH PL
																											M7A	16	31.8333	TH	PL	TH PL
																											M7A	17	7.66667	TH	PL	TH PL
																											M7A	18	1.5	TH	PL	TH PL
																											M7A	19	1.33333	TH	PL	TH PL
																											M7B	1	10.3	TH	PL	TH PL
																											M7B	2	2.4	TH	PL	TH PL
																											M7B	3	1.66667	TH	PL	TH PL
																											M7B	4	2.2	TH	PL	TH PL
																											M7B	5	2.16667	TH	PL	TH PL
																											M7B	6	3.1	TH	PL	TH PL
																											M7B	7	3	TH	PL	TH PL
																											M7B	8	8.2	TH	PL	TH PL
																											M7B	9	16	TH	PL	TH PL
																											M7B	10	18.7	TH	PL	TH PL
																											M7B	11	34	TH	PL	TH PL
																											M7B	12	29.1	TH	PL	TH PL
																											M7B	13	60	TH	PL	TH PL
																											M7B	14	54.5	TH	PL	TH PL
																											M7B	15	49	TH	PL	TH PL
																											M7B	16	38.25	TH	PL	TH PL
																											M7B	17	27.5	TH	PL	TH PL
																											M7B	18	18.4	TH	PL	TH PL
																											M7B	19	28.1667	TH	PL	TH PL

## Sheet: Appendicularian Size
id	M.code	Replicate.code	replicate	Day	temp	pH	Treatment.code	Body-length	Body-width	Gonad-length	Gonad-width	trunk-length			M.= Mesocosm
1	M5	5A	1	1	TL	PA	TL PA	169.104	84.7989	35.1031	22.9624	146.142			Measurments: values in µm
2	M5	5A	1	1	TL	PA	TL PA	177.494	85.1661	28.5285	14.9443	162.55			Trunk length = Body length - Gonad width
3	M5	5A	1	1	TL	PA	TL PA	138.637	78.3679	17.9255	10.1865	128.451			TL= Temperature low, ambient fjord temperature
4	M5	5A	1	1	TL	PA	TL PA	112.698	56.117	25.5976	10.6235	102.075			TH= targeted temperature +3C relative to TL
5	M5	5A	1	1	TL	PA	TL PA	167.49	83.9852	32.2127	15.6697	151.82			PA= Ambient pH
6	M5	5A	1	1	TL	PA	TL PA	142.235	70.9846	33.3018	17.4108	124.824			PL= low pH
7	M5	5A	1	1	TL	PA	TL PA	141.368	72.9562	31.5655	15.3464	126.021
8	M5	5A	1	1	TL	PA	TL PA	182.694	88.4526	35.0001	14.0679	168.626
9	M5	5B	2	1	TL	PA	TL PA	114.462	58.1916	21.2526	14.0037	100.458
10	M5	5B	2	1	TL	PA	TL PA	146.208	75.9013	25.4963	14.4229	131.785
11	M5	5B	2	1	TL	PA	TL PA	147.341	72.9306	24.5324	14.0037	133.338
12	M5	5B	2	1	TL	PA	TL PA	96.8141	54.2149	11.3144	6.829	89.9851
13	M5	5B	2	1	TL	PA	TL PA	125.106	62.0094	26.7862	13.0021	112.103
14	M5	5B	2	1	TL	PA	TL PA	135.918	72.6471	NA	NA	135.918
15	M5	5B	2	1	TL	PA	TL PA	112.234	69.5427	NA	NA	112.234
16	M5	5B	2	1	TL	PA	TL PA	136.317	71.858	NA	NA	136.317
17	M5	5B	2	1	TL	PA	TL PA	94.4415	53.7592	NA	NA	94.4415
18	M5	5B	2	1	TL	PA	TL PA	190.052	77.863	NA	NA	190.052
19	M5	5B	2	1	TL	PA	TL PA	98.8508	59.5443	NA	NA	98.8508
20	M6	6A	1	1	TL	PL	TL PL	152.71	72.9945	20.5894	12.8306	139.88
21	M6	6A	1	1	TL	PL	TL PL	156.215	80.5151	12.415	9.1875	147.028
22	M6	6B	2	1	TL	PL	TL PL	160.886	80.1377	25.1102	12.3113	148.575
23	M6	6B	2	1	TL	PL	TL PL	149.955	78.2652	19.2248	9.2885	140.666
24	M6	6B	2	1	TL	PL	TL PL	161.546	76.8537	28.7349	11.3144	150.231
25	M6	6B	2	1	TL	PL	TL PL	123.171	67.4611	20.8538	10.2663	112.904
26	M6	6B	2	1	TL	PL	TL PL	169.095	81.2775	31.8853	9.6577	159.437
27	M6	6B	2	1	TL	PL	TL PL	121.283	82.1904	14.4705	10.8515	110.431
28	M6	6B	2	1	TL	PL	TL PL	122.011	59.7788	24.6226	19.2974	102.714
29	M6	6B	2	1	TL	PL	TL PL	155.976	77.5574	15.928	9.6698	146.306
30	M7	7A	1	1	TH	PL	TH PL	139.678	76.2735	NA	NA	139.678
31	M7	7A	1	1	TH	PL	TH PL	128.946	71.3957	15.9864	11.0327	117.913
32	M7	7A	1	1	TH	PL	TH PL	144.351	64.8672	27.9116	15.7661	128.585
33	M7	7A	1	1	TH	PL	TH PL	142.729	79.2438	16.5173	10.4017	132.328
34	M7	7A	1	1	TH	PL	TH PL	157.138	78.7346	17.1951	12.7486	144.389
35	M7	7A	1	1	TH	PL	TH PL	161.357	79.3614	NA	NA	161.357
36	M7	7A	1	1	TH	PL	TH PL	123.085	67.4127	26.8383	14.037	109.048
37	M7	7A	1	1	TH	PL	TH PL	133.008	69.7135	19.4239	14.4866	118.522
38	M7	7A	1	1	TH	PL	TH PL	140.121	77.9727	18.3497	9.1875	130.934
39	M7	7A	1	1	TH	PL	TH PL	190.291	93.1575	29.5036	13.8278	176.463
40	M7	7A	1	1	TH	PL	TH PL	168.34	97.6367	27.059	16.9011	151.439
41	M7	7A	1	1	TH	PL	TH PL	152.318	77.3406	23.304	18.5833	133.735
42	M7	7A	1	1	TH	PL	TH PL	162.113	81.6082	25.1148	12.3113	149.802
43	M7	7B	2	1	TH	PL	TH PL	154.555	76.7854	23.6221	11.1169	143.438
44	M7	7B	2	1	TH	PL	TH PL	153.777	76.5481	33.8573	15.4524	138.325
45	M7	7B	2	1	TH	PL	TH PL	132.697	79.4055	NA	NA	132.697
46	M7	7B	2	1	TH	PL	TH PL	159.913	82.1266	28.2974	10.2663	149.646
47	M7	7B	2	1	TH	PL	TH PL	185.622	88.0461	33.8883	17.808	167.814
48	M5	5A	1	2	TL	PA	TL PA	175.921	100.039	NA	NA	175.921
49	M5	5A	1	2	TL	PA	TL PA	162.903	82.1777	34.9952	16.2325	146.67
50	M5	5A	1	2	TL	PA	TL PA	163.472	83.753	28.0948	23.309	140.163
51	M5	5A	1	2	TL	PA	TL PA	178.857	99.4763	33.2633	23.9407	154.917
52	M5	5A	1	2	TL	PA	TL PA	142.885	80.6424	25.883	14.037	128.848
53	M5	5A	1	2	TL	PA	TL PA	244.883	125.217	51.3005	20.7481	224.135
54	M5	5A	1	2	TL	PA	TL PA	180.054	88.873	NA	NA	180.054
55	M5	5A	1	2	TL	PA	TL PA	215.565	105.97	30.4519	33.4189	182.147
56	M5	5A	1	2	TL	PA	TL PA	235.176	118.088	37.8311	32.9819	202.194
57	M5	5B	2	2	TL	PA	TL PA	229.431	121.267	78.8659	35.1489	194.282
58	M5	5B	2	2	TL	PA	TL PA	180.974	90.1512	61.0233	21.9327	159.042
59	M5	5B	2	2	TL	PA	TL PA	165.562	94.4948	49.5472	18.5109	147.051
60	M5	5B	2	2	TL	PA	TL PA	206.239	100.296	55.7457	29.6849	176.554
61	M5	5B	2	2	TL	PA	TL PA	195.135	101.998	41.4754	25.0043	170.13
62	M5	5B	2	2	TL	PA	TL PA	252.699	129.042	54.4268	26.0868	226.613
63	M5	5B	2	2	TL	PA	TL PA	208.791	110.863	39.8775	15.7564	193.034
64	M5	5B	2	2	TL	PA	TL PA	265.685	130.198	62.8623	37.1453	228.539
65	M6	6A	1	2	TL	PL	TL PL	221.905	117.867	46.8987	27.405	194.5
66	M6	6A	1	2	TL	PL	TL PL	225.068	127.006	63.6778	38.5999	186.468
67	M6	6A	1	2	TL	PL	TL PL	192.131	104.298	58.2847	27.5986	164.532
68	M6	6A	1	2	TL	PL	TL PL	151.021	82.1845	34.0715	16.1253	134.896
69	M6	6A	1	2	TL	PL	TL PL	192.951	112.309	NA	NA	192.951
70	M6	6A	1	2	TL	PL	TL PL	149.926	83.6307	30.5767	17.8109	132.115
71	M6	6A	1	2	TL	PL	TL PL	174.22	91.9079	45.6883	20.2335	153.987
72	M6	6A	1	2	TL	PL	TL PL	193.016	89.2007	53.8208	27.3919	165.624
73	M6	6A	1	2	TL	PL	TL PL	193.965	108.254	52.3528	31.834	162.131
74	M6	6A	1	2	TL	PL	TL PL	196.611	103.171	33.9261	31.4582	165.153
75	M6	6A	1	2	TL	PL	TL PL	219.857	114.333	44.0758	15.2883	204.569
76	M6	6A	1	2	TL	PL	TL PL	202.23	110.739	NA	NA	202.23
77	M6	6A	1	2	TL	PL	TL PL	185.101	83.9617	42.694	23.8693	161.232
78	M6	6A	1	2	TL	PL	TL PL	216.819	110.664	78.7649	22.9624	193.857
79	M6	6A	1	2	TL	PL	TL PL	203.24	110.915	55.5302	23.3368	179.903
80	M6	6A	1	2	TL	PL	TL PL	185.783	101.601	53.2569	25.8284	159.954
81	M6	6A	1	2	TL	PL	TL PL	217.708	110.603	35.4349	29.0454	188.663
82	M6	6B	2	2	TL	PL	TL PL	256.708	124.459	54.2714	27.8041	228.904
83	M6	6B	2	2	TL	PL	TL PL	202.826	97.1169	44.4576	24.4788	178.347
84	M6	6B	2	2	TL	PL	TL PL	212.105	104.926	61.4033	17.3091	194.796
85	M6	6B	2	2	TL	PL	TL PL	216.175	121.477	66.8417	24.3368	191.838
86	M6	6B	2	2	TL	PL	TL PL	186.499	110.8	NA	NA	186.499
87	M6	6B	2	2	TL	PL	TL PL	244.844	132.25	83.5709	30.4519	214.392
88	M6	6B	2	2	TL	PL	TL PL	251.567	126.612	84.4256	19.8788	231.689
89	M6	6B	2	2	TL	PL	TL PL	247.606	142.734	54.3458	35.2636	212.342
90	M6	6B	2	2	TL	PL	TL PL	194.655	122.583	NA	NA	194.655
91	M7	7A	1	2	TH	PL	TH PL	201.325	105.795	NA	NA	201.325
92	M7	7A	1	2	TH	PL	TH PL	193.113	108.383	46.4161	27.2915	165.821
93	M7	7A	1	2	TH	PL	TH PL	213.798	115.666	53.9227	20.319	193.479
94	M7	7A	1	2	TH	PL	TH PL	241.691	132.013	75.0399	29.5826	212.109
95	M7	7A	1	2	TH	PL	TH PL	214.375	139.343	68.6268	29.2684	185.107
96	M7	7A	1	2	TH	PL	TH PL	235.727	113.72	71.3128	20.4324	215.294
97	M7	7A	1	2	TH	PL	TH PL	217.093	114.307	37.7215	28.488	188.605
98	M7	7A	1	2	TH	PL	TH PL	230.707	135.977	63.1111	32.8277	197.879
99	M7	7A	1	2	TH	PL	TH PL	263.515	138.804	63.5377	25.0332	238.482
100	M7	7A	1	2	TH	PL	TH PL	260.723	127.706	63.871	21.5875	239.135
101	M7	7A	1	2	TH	PL	TH PL	243.813	119.766	73.1333	28.074	215.739
102	M7	7B	2	2	TH	PL	TH PL	259.319	145.752	84.8855	32.9318	226.387
103	M7	7B	2	2	TH	PL	TH PL	218.026	121.255	71.2758	21.0017	197.024
104	M7	7B	2	2	TH	PL	TH PL	244.752	135.414	76.064	34.0233	210.729
105	M7	7B	2	2	TH	PL	TH PL	220.462	114.226	41.5867	26.9238	193.538
106	M7	7B	2	2	TH	PL	TH PL	230.845	132.281	78.5427	20.7481	210.097
107	M7	7B	2	2	TH	PL	TH PL	249.704	126.013	82.8568	27.413	222.291
108	M7	7B	2	2	TH	PL	TH PL	177.782	84.2942	29.365	21.853	155.929
109	M5	5A	1	4	TL	PA	TL PA	371.88	214.904	140.416	57.3649	314.515
110	M5	5A	1	4	TL	PA	TL PA	393.671	224.52	156.394	55.8802	337.791
111	M5	5A	1	4	TL	PA	TL PA	323.467	183.322	175.037	63.8337	259.634
112	M5	5A	1	4	TL	PA	TL PA	411.014	224.841	160.673	47.8797	363.134
113	M5	5A	1	4	TL	PA	TL PA	443.728	253.557	174.955	43.5281	400.2
114	M5	5A	1	4	TL	PA	TL PA	453.672	218.004	221.051	102.566	351.106
115	M5	5A	1	4	TL	PA	TL PA	501.148	253.507	217.773	113.657	387.491
116	M5	5A	1	4	TL	PA	TL PA	295.139	153.254	138.695	23.5657	271.573
117	M5	5A	1	4	TL	PA	TL PA	385.595	210.01	163.297	77.9993	307.595
118	M5	5A	1	4	TL	PA	TL PA	362.422	184.783	144.551	67.308	295.114
119	M5	5A	1	4	TL	PA	TL PA	360.14	207.483	123.63	48.7846	311.356
120	M5	5A	1	4	TL	PA	TL PA	342.373	161.508	109.395	57.2598	285.113
121	M5	5A	1	4	TL	PA	TL PA	321.532	157.763	154.869	34.8021	286.73
122	M5	5A	1	4	TL	PA	TL PA	391.227	186.098	154.208	86.3376	304.89
123	M5	5A	1	4	TL	PA	TL PA	432.747	222.207	180.974	43.0008	389.747
124	M5	5B	2	4	TL	PA	TL PA	517.64	258.841	190.321	97.3515	420.289
125	M5	5B	2	4	TL	PA	TL PA	366.518	206.774	105.498	54.0802	312.437
126	M5	5B	2	4	TL	PA	TL PA	288.986	128.388	119.263	41.3548	247.631
127	M5	5B	2	4	TL	PA	TL PA	325.433	162.466	108.249	30.9967	294.437
128	M5	5B	2	4	TL	PA	TL PA	334.403	199.788	118.211	37.2993	297.104
129	M5	5B	2	4	TL	PA	TL PA	300	173.858	101.885	48.6955	251.304
130	M5	5B	2	4	TL	PA	TL PA	446.784	222.901	201.96	85.1142	361.669
131	M5	5B	2	4	TL	PA	TL PA	318.77	161.493	100.192	46.4744	272.295
132	M5	5B	2	4	TL	PA	TL PA	387.313	203.779	179.931	83.5878	303.725
133	M5	5B	2	4	TL	PA	TL PA	339.287	184.053	147.5	58.291	280.996
134	M5	5B	2	4	TL	PA	TL PA	297.936	158.03	100.606	27.903	270.033
135	M5	5B	2	4	TL	PA	TL PA	436.471	221.644	198.04	60.2552	376.216
136	M5	5B	2	4	TL	PA	TL PA	335.507	187.934	106.219	54.2326	281.275
137	M6	6A	1	4	TL	PL	TL PL	496.804	255.504	229.485	98.7305	398.073
138	M6	6A	1	4	TL	PL	TL PL	383.401	196.093	139.673	58.2582	325.142
139	M6	6A	1	4	TL	PL	TL PL	272.752	129.363	123.732	70.2797	202.472
140	M6	6A	1	4	TL	PL	TL PL	587.763	282.387	266.86	128.985	458.777
141	M6	6A	1	4	TL	PL	TL PL	381.776	213.693	153.364	41.9545	339.822
142	M6	6A	1	4	TL	PL	TL PL	557.035	267.999	259.945	116.127	440.908
143	M6	6A	1	4	TL	PL	TL PL	309.842	182.336	120.054	46.8953	262.946
144	M6	6A	1	4	TL	PL	TL PL	263.517	155.511	129.634	40.5298	222.987
145	M6	6A	1	4	TL	PL	TL PL	450.447	214.759	172.845	77.8337	372.613
146	M6	6A	1	4	TL	PL	TL PL	434.603	226.54	189.632	68.9012	365.702
147	M6	6A	1	4	TL	PL	TL PL	375.175	187.822	167.932	45.4145	329.761
148	M6	6A	1	4	TL	PL	TL PL	370.491	185.284	146.766	39.0577	331.434
149	M6	6A	1	4	TL	PL	TL PL	420.078	223.328	144.275	59.8794	360.199
150	M6	6A	1	4	TL	PL	TL PL	410.899	200.177	156.262	51.0805	359.819
151	M6	6A	1	4	TL	PL	TL PL	576.45	314.701	226.657	72.4137	504.036
152	M6	6A	1	4	TL	PL	TL PL	516.701	304.27	195.384	75.1138	441.587
153	M6	6B	2	4	TL	PL	TL PL	671.975	336.096	285.095	99.3019	572.673
154	M6	6B	2	4	TL	PL	TL PL	606.691	313.351	177.004	84.4225	522.269
155	M6	6B	2	4	TL	PL	TL PL	787.007	423.487	332.151	119.637	667.37
156	M6	6B	2	4	TL	PL	TL PL	659.679	383.311	303.876	144.275	515.405
157	M6	6B	2	4	TL	PL	TL PL	684.748	353.303	325.696	161.274	523.474
158	M6	6B	2	4	TL	PL	TL PL	800.707	464.182	374.59	205.608	595.099
159	M6	6B	2	4	TL	PL	TL PL	419.866	223.447	155.1	51.8509	368.015
160	M6	6B	2	4	TL	PL	TL PL	444.976	233.083	201.604	77.7826	367.194
161	M6	6B	2	4	TL	PL	TL PL	319.911	170.822	144.116	50.4941	269.417
162	M6	6B	2	4	TL	PL	TL PL	397.082	220.921	188.584	62.7557	334.326
163	M6	6B	2	4	TL	PL	TL PL	323.663	175.802	138.382	48.5865	275.077
164	M7	7A	1	4	TH	PL	TH PL	428.796	224.181	202.324	68.207	360.589
165	M7	7A	1	4	TH	PL	TH PL	594.778	315.781	291.706	120.35	474.427
166	M7	7A	1	4	TH	PL	TH PL	533.187	276.637	259.756	93.9694	439.217
167	M7	7A	1	4	TH	PL	TH PL	537.613	281.406	273.952	133.308	404.305
168	M7	7A	1	4	TH	PL	TH PL	434.313	234.004	193.763	47.2128	387.1
169	M7	7A	1	4	TH	PL	TH PL	466.577	264.139	196.452	43.5281	423.049
170	M7	7A	1	4	TH	PL	TH PL	495.611	257.292	219.881	104.197	391.414
171	M7	7A	1	4	TH	PL	TH PL	392.086	243.422	195.334	52.7855	339.301
172	M7	7A	1	4	TH	PL	TH PL	382.983	224.319	141.163	63.1299	319.853
173	M7	7A	1	4	TH	PL	TH PL	427.009	251.208	194.387	62.7636	364.245
174	M7	7A	1	4	TH	PL	TH PL	431.548	233.494	210.157	74.8557	356.692
175	M7	7A	1	4	TH	PL	TH PL	487.326	265.474	178.397	68.3898	418.936
176	M7	7A	1	4	TH	PL	TH PL	549.701	310.494	254.921	107.822	441.879
177	M7	7A	1	4	TH	PL	TH PL	546.602	294.583	251.093	76.5563	470.046
178	M7	7A	1	4	TH	PL	TH PL	373.348	191.127	218.873	123.521	249.827
179	M7	7A	1	4	TH	PL	TH PL	444.759	237.504	198.879	53.3165	391.442
180	M7	7A	1	4	TH	PL	TH PL	572.201	258.781	227.947	100.918	471.282
181	M7	7A	1	4	TH	PL	TH PL	515.185	283.447	223.701	111.45	403.734
182	M7	7A	1	4	TH	PL	TH PL	416.379	255.591	173.95	74.1782	342.201
183	M7	7B	2	4	TH	PL	TH PL	304.026	170.953	98.7305	39.8305	264.195
184	M7	7B	2	4	TH	PL	TH PL	388.873	218.388	187.475	48.4882	340.385
185	M7	7B	2	4	TH	PL	TH PL	587.563	300.685	259.16	111.053	476.51
186	M7	7B	2	4	TH	PL	TH PL	456.577	255.606	194.328	65.1669	391.41
187	M7	7B	2	4	TH	PL	TH PL	465.901	253.682	182.602	57.1552	408.746
188	M7	7B	2	4	TH	PL	TH PL	525.623	277.112	252.497	89.7729	435.85
189	M7	7B	2	4	TH	PL	TH PL	530.619	266.997	230.779	111.76	418.859
190	M7	7B	2	4	TH	PL	TH PL	421.287	240.971	177.306	55.2403	366.047
191	M7	7B	2	4	TH	PL	TH PL	401.053	231.52	211.078	115.773	285.28
192	M7	7B	2	4	TH	PL	TH PL	328.607	198.67	112.523	47.1563	281.451
193	M7	7B	2	4	TH	PL	TH PL	521.885	269.182	236.888	77.9684	443.917
194	M7	7B	2	4	TH	PL	TH PL	501.856	285.591	218.034	85.4846	416.371
195	M7	7B	2	4	TH	PL	TH PL	505.074	263.955	230.119	100.471	404.602
196	M5	5A	1	6	TL	PA	TL PA	656.283	313.821	308.924	157.587	498.697
197	M5	5A	1	6	TL	PA	TL PA	743.949	354.158	367.892	225.921	518.028
198	M5	5A	1	6	TL	PA	TL PA	544.795	291.996	197.246	115.324	429.471
199	M5	5A	1	6	TL	PA	TL PA	585.143	258.157	241.285	121.649	463.495
200	M5	5A	1	6	TL	PA	TL PA	592.798	301.625	299.605	202.994	389.804
201	M5	5A	1	6	TL	PA	TL PA	631.107	328.471	299.605	143.566	487.541
202	M5	5A	1	6	TL	PA	TL PA	353.827	193.523	116.215	53.2433	300.584
203	M5	5A	1	6	TL	PA	TL PA	683.749	324.253	314.269	152.339	531.41
204	M5	5A	1	6	TL	PA	TL PA	542.326	292.532	207.499	85.2854	457.041
205	M5	5A	1	6	TL	PA	TL PA	564.381	309.605	239.518	128.148	436.233
206	M5	5A	1	6	TL	PA	TL PA	634.328	288.769	302.378	191.624	442.705
207	M5	5A	1	6	TL	PA	TL PA	581.188	312.868	277.106	101.73	479.457
208	M5	5A	1	6	TL	PA	TL PA	538.631	274.345	288.507	80.8296	457.801
209	M5	5B	2	6	TL	PA	TL PA	569.885	289.802	305.855	139.41	430.476
210	M5	5B	2	6	TL	PA	TL PA	459.673	231.834	198.156	82.4537	377.219
211	M5	5B	2	6	TL	PA	TL PA	807.567	372.606	428.128	238.179	569.387
212	M5	5B	2	6	TL	PA	TL PA	462.399	239.371	199.894	49.1276	413.271
213	M5	5B	2	6	TL	PA	TL PA	376.403	198.011	141.503	56.8518	319.551
214	M5	5B	2	6	TL	PA	TL PA	615.071	304.495	296.955	94.6087	520.463
215	M5	5B	2	6	TL	PA	TL PA	729.614	347.263	349.041	213.9	515.714
216	M5	5B	2	6	TL	PA	TL PA	445.275	241.589	207.928	38.0874	407.188
217	M5	5B	2	6	TL	PA	TL PA	381.81	194.346	166.448	73.7157	308.094
218	M5	5B	2	6	TL	PA	TL PA	772.356	360.052	336.309	163.384	608.972
219	M5	5B	2	6	TL	PA	TL PA	580.131	355.699	267.692	121.132	458.999
220	M5	5B	2	6	TL	PA	TL PA	818.285	384.332	410.388	209.92	608.364
221	M5	5B	2	6	TL	PA	TL PA	634.427	329.207	346.933	215.814	418.613
222	M5	5B	2	6	TL	PA	TL PA	364.059	191.945	145.483	56.1338	307.925
223	M5	5B	2	6	TL	PA	TL PA	295.708	182.872	96.1815	53.6979	242.011
224	M5	5B	2	6	TL	PA	TL PA	396.559	233.649	138.177	33.5231	363.036
225	M5	5B	2	6	TL	PA	TL PA	616.431	284.026	280.91	153.418	463.013
226	M5	5B	2	6	TL	PA	TL PA	709.602	345.06	326.211	186.299	523.302
227	M5	5B	2	6	TL	PA	TL PA	612.059	305.647	273.769	155.104	456.955
228	M6	6A	1	6	TL	PL	TL PL	766.456	391.565	429.203	256.439	510.017
229	M6	6A	1	6	TL	PL	TL PL	621.503	320.866	301.729	121.353	500.15
230	M6	6A	1	6	TL	PL	TL PL	624.29	347.789	297.692	66.2392	558.051
231	M6	6A	1	6	TL	PL	TL PL	559.004	268.966	250.149	103.735	455.268
232	M6	6A	1	6	TL	PL	TL PL	808.902	441.332	371.391	194.346	614.555
233	M6	6A	1	6	TL	PL	TL PL	713.936	370.517	353.814	115.731	598.205
234	M6	6A	1	6	TL	PL	TL PL	660.66	364.657	292.62	82.4537	578.207
235	M6	6A	1	6	TL	PL	TL PL	705.575	355.18	310.525	156.955	548.62
236	M6	6A	1	6	TL	PL	TL PL	574.369	292.889	184.09	59.5267	514.843
237	M6	6A	1	6	TL	PL	TL PL	756.293	391.542	428.16	256.896	499.397
238	M6	6A	1	6	TL	PL	TL PL	435.369	264.328	191.378	63.1299	372.24
239	M6	6A	1	6	TL	PL	TL PL	606.684	371.498	311.901	98.3743	508.309
240	M6	6A	1	6	TL	PL	TL PL	662.668	336.315	268.817	190.666	472.001
241	M6	6A	1	6	TL	PL	TL PL	705.374	334.512	362.981	142.584	562.79
242	M6	6A	1	6	TL	PL	TL PL	447.123	234.213	167.106	73.6914	373.432
243	M6	6A	1	6	TL	PL	TL PL	607.146	317.717	277.763	103.778	503.369
244	M6	6A	1	6	TL	PL	TL PL	539.053	234.737	261.429	133.045	406.008
245	M6	6A	1	6	TL	PL	TL PL	661.136	296.144	301.948	174.343	486.794
246	M6	6A	1	6	TL	PL	TL PL	343.537	179.567	163.921	63.0646	280.473
247	M6	6B	2	6	TL	PL	TL PL	686.45	334.286	315.526	144.857	541.592
248	M6	6B	2	6	TL	PL	TL PL	392.677	196.567	156.378	51.4439	341.233
249	M7	7A	1	6	TH	PL	TH PL	108.236	53.8242	NA	NA	108.236
250	M7	7A	1	6	TH	PL	TH PL	132.484	68.577	NA	NA	132.484
251	M7	7A	1	6	TH	PL	TH PL	131.36	63.7413	NA	NA	131.36
252	M7	7A	1	6	TH	PL	TH PL	105.407	59.5737	NA	NA	105.407
253	M7	7B	2	6	TH	PL	TH PL	593.861	297.475	269.783	66.493	527.368
254	M7	7B	2	6	TH	PL	TH PL	113.716	58.1475	NA	NA	113.716
255	M7	7B	2	6	TH	PL	TH PL	101.499	61.5148	NA	NA	101.499
256	M7	7B	2	6	TH	PL	TH PL	104.706	59.5737	NA	NA	104.706
257	M7	7B	2	6	TH	PL	TH PL	127.204	64.7143	NA	NA	127.204
258	M5	5A	1	8	TL	PA	TL PA	549.879	255.079	249.904	153.389	396.491
259	M5	5A	1	8	TL	PA	TL PA	896.277	451.244	375.348	174.147	722.13
260	M5	5A	1	8	TL	PA	TL PA	415.238	243.258	158.306	21.9581	393.28
261	M5	5B	2	8	TL	PA	TL PA	1070.29	492.043	489.349	320.561	749.728
262	M5	5B	2	8	TL	PA	TL PA	768.49	368.64	397.75	221.075	547.415
263	M6	6A	1	8	TL	PL	TL PL	106.962	60.7826	NA	NA	106.962
264	M6	6A	1	8	TL	PL	TL PL	101.153	53.9886	NA	NA	101.153
265	M6	6A	1	8	TL	PL	TL PL	134.85	75.8304	26.272	8.2516	126.598
266	M6	6A	1	8	TL	PL	TL PL	114.119	57.3907	16.0519	9.908	104.211
267	M6	6A	1	8	TL	PL	TL PL	115.28	56.6546	17.0727	10.5905	104.69
268	M6	6B	2	8	TL	PL	TL PL	1050.87	405.078	580.384	365.698	685.167
269	M6	6B	2	8	TL	PL	TL PL	110.374	56.8415	NA	NA	110.374
270	M6	6B	2	8	TL	PL	TL PL	112.03	55.0578	NA	NA	112.03
271	M7	7A	1	8	TH	PL	TH PL	198.725	91.4281	51.9189	15.4826	183.242
272	M7	7A	1	8	TH	PL	TH PL	195.395	103.703	61.6057	12.5922	182.803
273	M7	7A	1	8	TH	PL	TH PL	181.774	95.4118	55.8901	11.0115	170.763
274	M7	7A	1	8	TH	PL	TH PL	159.497	85.5136	44.0594	10.0482	149.448
275	M7	7A	1	8	TH	PL	TH PL	195.424	104.211	47.3625	28.4945	166.93
276	M7	7A	1	8	TH	PL	TH PL	152.187	35.2542	83.7349	10.7218	141.465
277	M7	7A	1	8	TH	PL	TH PL	159.633	72.5379	32.2994	22.1603	137.472
278	M7	7A	1	8	TH	PL	TH PL	246.905	133.27	59.7871	33.0653	213.84
279	M7	7A	1	8	TH	PL	TH PL	226.415	117.912	57.1443	32.964	193.451
280	M7	7A	1	8	TH	PL	TH PL	162.694	81.9944	51.309	21.3784	141.315
281	M7	7A	1	8	TH	PL	TH PL	111.668	63.5508	28.5558	13.8362	97.8313
282	M7	7A	1	8	TH	PL	TH PL	157.78	74.0695	36.2166	10.6673	147.113
283	M7	7A	1	8	TH	PL	TH PL	160.168	84.1613	48.4552	20.8985	139.27
284	M7	7A	1	8	TH	PL	TH PL	206.338	112.732	58.4375	16.2899	190.048
285	M7	7A	1	8	TH	PL	TH PL	190.124	109.799	44.8905	26.5764	163.548
286	M7	7A	1	8	TH	PL	TH PL	151.502	80.447	43.9879	20.287	131.215
287	M7	7A	1	8	TH	PL	TH PL	198.208	106.643	52.2324	31.8853	166.323
288	M7	7A	1	8	TH	PL	TH PL	197.276	103.41	56.314	26.9034	170.373
289	M7	7A	1	8	TH	PL	TH PL	149.009	82.0001	36.3548	18.2222	130.786
290	M7	7B	2	8	TH	PL	TH PL	181.223	96.9657	NA	NA	181.223
291	M7	7B	2	8	TH	PL	TH PL	216.052	114.162	71.2388	32.5798	183.472
292	M7	7B	2	8	TH	PL	TH PL	197.042	99.9055	62.4478	31.8853	165.157
293	M7	7B	2	8	TH	PL	TH PL	230.311	122.87	74.3084	26.3606	203.951
294	M7	7B	2	8	TH	PL	TH PL	222.307	96.0063	62.0582	16.6719	205.635
295	M7	7B	2	8	TH	PL	TH PL	207.676	106.905	82.25	24.6226	183.053
296	M7	7B	2	8	TH	PL	TH PL	139.888	64.2949	NA	NA	139.888
297	M7	7B	2	8	TH	PL	TH PL	183.345	101.112	46.6781	25.9145	157.431
298	M7	7B	2	8	TH	PL	TH PL	198.612	100.055	47.5688	30.326	168.286
299	M7	7B	2	8	TH	PL	TH PL	218.882	125.194	62.9165	29.1178	189.765
300	M7	7B	2	8	TH	PL	TH PL	181.242	104.125	41.1221	24.1444	157.098
301	M7	7B	2	8	TH	PL	TH PL	194.886	102.445	48.4912	33.0346	161.852
302	M7	7B	2	8	TH	PL	TH PL	219.625	124.589	71.4936	34.0222	185.603
303	M7	7B	2	8	TH	PL	TH PL	195.546	110.665	51.3318	32.0021	163.543
304	M7	7B	2	8	TH	PL	TH PL	182.207	100.821	48.7215	30.7384	151.469
305	M7	7B	2	8	TH	PL	TH PL	204.645	107.999	47.1651	30.7384	173.906
306	M5	5A	1	10	TL	PA	TL PA	163.456	76.2246	28.7024	19.2974	144.159
307	M5	5A	1	10	TL	PA	TL PA	138.179	64.8223	22.5463	17.4108	120.768
308	M5	5A	1	10	TL	PA	TL PA	210.188	117.89	43.9826	14.6864	195.501
309	M5	5A	1	10	TL	PA	TL PA	163.934	85.9718	30.0789	18.4827	145.451
310	M5	5A	1	10	TL	PA	TL PA	166.317	80.1086	26.0804	24.1492	142.167
311	M5	5A	1	10	TL	PA	TL PA	132.985	70.983	40.9801	10.7218	122.263
312	M5	5A	1	10	TL	PA	TL PA	108.525	59.7398	25.6113	9.6698	98.8557
313	M5	5A	1	10	TL	PA	TL PA	186.881	94.8234	25.9505	10.0482	176.832
314	M5	5B	2	10	TL	PA	TL PA	133.892	63.0646	26.418	17.0727	116.819
315	M5	5B	2	10	TL	PA	TL PA	165.064	92.3429	57.0729	18.783	146.281
316	M5	5B	2	10	TL	PA	TL PA	143.879	81.0462	43.8472	12.0722	131.807
317	M5	5B	2	10	TL	PA	TL PA	204.008	113.848	60.1831	33.7331	170.275
318	M5	5B	2	10	TL	PA	TL PA	168.002	89.3605	58.0632	17.4442	150.558
319	M6	6A	1	10	TL	PL	TL PL	173.707	93.7177	39.1884	25.743	147.964
320	M6	6A	1	10	TL	PL	TL PL	122.804	67.8248	26.1385	9.7777	113.026
321	M6	6A	1	10	TL	PL	TL PL	139.485	74.7402	33.8573	9.955	129.53
322	M6	6A	1	10	TL	PL	TL PL	175.256	95.3066	37.1448	17.4509	157.805
323	M6	6A	1	10	TL	PL	TL PL	171.999	88.9617	36.7789	23.6615	148.337
324	M6	6B	2	10	TL	PL	TL PL	199.245	84.7961	53.3477	24.6793	174.566
325	M6	6B	2	10	TL	PL	TL PL	168.407	94.6326	38.3433	20.166	148.241
326	M6	6B	2	10	TL	PL	TL PL	176.493	89.6276	47.6472	18.1002	158.393
327	M6	6B	2	10	TL	PL	TL PL	134.872	73.6939	45.8006	19.7099	115.162
328	M7	7A	1	10	TH	PL	TH PL	348.282	170.264	102.958	54.2326	294.049
329	M7	7A	1	10	TH	PL	TH PL	288.33	151.705	117.192	38.5113	249.818
330	M7	7A	1	10	TH	PL	TH PL	212.484	113.649	64.5584	25.0361	187.448
331	M7	7A	1	10	TH	PL	TH PL	270.371	149.863	98.8092	29.2711	241.1
332	M7	7A	1	10	TH	PL	TH PL	285.606	161.559	111.963	39.3708	246.235
333	M7	7A	1	10	TH	PL	TH PL	722.731	331.525	387.046	242.677	480.055
334	M7	7A	1	10	TH	PL	TH PL	521.726	292.943	211.429	43.2731	478.453
335	M7	7A	1	10	TH	PL	TH PL	276.726	157.55	113.44	46.1805	230.546
336	M7	7A	1	10	TH	PL	TH PL	318.285	170.793	131.649	40.4139	277.871
337	M7	7A	1	10	TH	PL	TH PL	785.89	418.12	389.525	219.326	566.564
338	M7	7A	1	10	TH	PL	TH PL	545.739	296.209	262.844	130.02	415.719
339	M7	7A	1	10	TH	PL	TH PL	372.319	216.774	133.649	42.0539	330.265
340	M7	7A	1	10	TH	PL	TH PL	549.377	281.774	241.925	126.162	423.216
341	M7	7A	1	10	TH	PL	TH PL	403.689	232.81	174.648	41.93	361.759
342	M7	7A	1	10	TH	PL	TH PL	286.338	150.015	122.022	32.2538	254.084
343	M7	7A	1	10	TH	PL	TH PL	206.053	119.823	51.8387	29.8348	176.218
344	M7	7A	1	10	TH	PL	TH PL	704.029	331.007	342.636	246.019	458.01
345	M7	7A	1	10	TH	PL	TH PL	332.473	176.186	125.251	59.2678	273.205
346	M7	7A	1	10	TH	PL	TH PL	290.207	147.5	122.819	45.9338	244.273
347	M7	7A	1	10	TH	PL	TH PL	416.239	210.459	176.219	75.4438	340.795
348	M7	7A	1	10	TH	PL	TH PL	427.55	231.558	154	71.9502	355.6
349	M7	7A	1	10	TH	PL	TH PL	364.642	191.685	168.817	44.235	320.407
350	M7	7A	1	10	TH	PL	TH PL	420.874	260.629	180.914	70.5898	350.284
351	M7	7A	1	10	TH	PL	TH PL	200.373	124.589	77.7736	33.5946	166.778
352	M7	7A	1	10	TH	PL	TH PL	188.934	101.347	58.5272	26.6684	162.265
353	M7	7A	1	10	TH	PL	TH PL	518.699	267.522	208.731	144.069	374.63
354	M7	7B	2	10	TH	PL	TH PL	329.634	178.784	131.054	54.2221	275.412
355	M7	7B	2	10	TH	PL	TH PL	669.303	326.842	312.007	229.175	440.128
356	M7	7B	2	10	TH	PL	TH PL	474.811	250.073	190.2	82.4304	392.381
357	M7	7B	2	10	TH	PL	TH PL	553.686	286.28	249.211	143.432	410.254
358	M7	7B	2	10	TH	PL	TH PL	308.327	152.673	134.699	54.9264	253.4
359	M7	7B	2	10	TH	PL	TH PL	552.487	289.882	262.292	135.892	416.595
360	M7	7B	2	10	TH	PL	TH PL	695.348	402.629	307.79	167.474	527.874
361	M7	7B	2	10	TH	PL	TH PL	1174.11	549.17	588.726	356.104	818.003
362	M7	7B	2	10	TH	PL	TH PL	685.036	391.537	297.291	161.302	523.733
363	M7	7B	2	10	TH	PL	TH PL	550.33	284.205	250.702	103.531	446.799
364	M7	7B	2	10	TH	PL	TH PL	515.745	245.591	214.584	109.507	406.238
365	M7	7B	2	10	TH	PL	TH PL	324.44	169.106	130.694	39.6926	284.748
366	M7	7B	2	10	TH	PL	TH PL	397.473	205.18	165.176	51.7241	345.749
367	M7	7B	2	10	TH	PL	TH PL	458.225	258.437	188.239	52.5225	405.703
368	M7	7B	2	10	TH	PL	TH PL	555.895	271.397	250.006	90.7427	465.152
369	M7	7B	2	10	TH	PL	TH PL	430.061	219.637	180.698	53.6425	376.419
370	M7	7B	2	10	TH	PL	TH PL	525.515	239.532	266.114	156.929	368.586
371	M7	7B	2	10	TH	PL	TH PL	257.457	134.583	73.2045	31.9805	225.477
372	M7	7B	2	10	TH	PL	TH PL	353.402	182.929	121.681	53.0475	300.354
373	M7	7B	2	10	TH	PL	TH PL	317.701	174.357	101.372	44.283	273.418
374	M7	7B	2	10	TH	PL	TH PL	286.247	153.206	85.8371	36.2407	250.007
375	M7	7B	2	10	TH	PL	TH PL	289.468	168.779	98.3875	43.5427	245.926
376	M7	7B	2	10	TH	PL	TH PL	320.845	163.512	117.561	43.4231	277.422
377	M7	7B	2	10	TH	PL	TH PL	319.313	169.456	107.193	46.8792	272.434
378	M7	7B	2	10	TH	PL	TH PL	296.775	174.268	103.865	53.6084	243.167
379	M7	7B	2	10	TH	PL	TH PL	393.5	206.482	165.134	82.2473	311.253
380	M7	7B	2	10	TH	PL	TH PL	416.078	192.614	188.933	101.612	314.466
381	M7	7B	2	10	TH	PL	TH PL	653.42	308.396	300.81	195.562	457.858
382	M7	7B	2	10	TH	PL	TH PL	301.874	176.024	103.023	49.7376	252.136
383	M7	7B	2	10	TH	PL	TH PL	420.477	243.495	185.405	49.218	371.259
384	M7	7B	2	10	TH	PL	TH PL	455.565	253.302	181.948	44.786	410.779
385	M7	7B	2	10	TH	PL	TH PL	397.339	202.929	167.488	70.2797	327.06
386	M5	5A	1	12	TL	PA	TL PA	199.021	105.842	49.4837	25.9145	173.106
387	M5	5A	1	12	TL	PA	TL PA	165.403	87.5362	35.6161	18.203	147.2
388	M5	5A	1	12	TL	PA	TL PA	316.706	174.902	116.875	54.4702	262.236
389	M5	5A	1	12	TL	PA	TL PA	198.802	105.523	48.6976	19.9918	178.811
390	M5	5A	1	12	TL	PA	TL PA	202.367	101.091	62.0376	25.6659	176.701
391	M5	5A	1	12	TL	PA	TL PA	331.678	161.328	94.1633	37.6157	294.063
392	M5	5A	1	12	TL	PA	TL PA	170.894	82.4284	48.2043	15.4599	155.434
393	M5	5A	1	12	TL	PA	TL PA	279.183	158.27	89.7212	40.0448	239.138
394	M5	5A	1	12	TL	PA	TL PA	210.83	114.064	62.9165	26.5764	184.254
395	M5	5A	1	12	TL	PA	TL PA	166.288	88.3897	38.1512	29.472	136.817
396	M5	5A	1	12	TL	PA	TL PA	320.965	167.091	130.219	37.1039	283.861
397	M5	5A	1	12	TL	PA	TL PA	255.411	142.071	91.9317	60.8516	194.56
398	M5	5A	1	12	TL	PA	TL PA	171.85	85.5967	39.1169	25.9145	145.936
399	M5	5A	1	12	TL	PA	TL PA	167.615	92.1926	42.1111	29.1858	138.429
400	M5	5A	1	12	TL	PA	TL PA	302.29	155.996	123.996	59.6988	242.591
401	M5	5A	1	12	TL	PA	TL PA	326.263	171.048	136.211	52.1846	274.078
402	M5	5A	1	12	TL	PA	TL PA	223.654	122.659	76.6965	34.3067	189.347
403	M5	5A	1	12	TL	PA	TL PA	205.663	101.721	60.9669	30.7492	174.914
404	M5	5A	1	12	TL	PA	TL PA	307.119	160.61	133.341	52.3127	254.806
405	M5	5A	1	12	TL	PA	TL PA	288.348	158.324	96.3088	48.1844	240.164
406	M5	5A	1	12	TL	PA	TL PA	208.798	121.943	89.6985	30.5001	178.298
407	M5	5A	1	12	TL	PA	TL PA	269.274	133.942	90.8155	39.4329	229.842
408	M5	5B	2	12	TL	PA	TL PA	291.394	151.654	109.879	50.4941	240.9
409	M5	5B	2	12	TL	PA	TL PA	322.777	171.92	109.112	45.2145	277.563
410	M5	5B	2	12	TL	PA	TL PA	228.584	120.598	72.0682	33.5607	195.023
411	M5	5B	2	12	TL	PA	TL PA	205.353	108.944	44.288	30.4577	174.895
412	M5	5B	2	12	TL	PA	TL PA	322.971	181.821	112.421	52.7909	270.181
413	M5	5B	2	12	TL	PA	TL PA	249.841	129.154	89.7978	32.391	217.45
414	M5	5B	2	12	TL	PA	TL PA	245.342	121.268	70.2797	36.6904	208.652
415	M5	5B	2	12	TL	PA	TL PA	266.613	142.39	117.84	43.057	223.556
416	M5	5B	2	12	TL	PA	TL PA	231.475	122.274	73.6085	36.2295	195.245
417	M5	5B	2	12	TL	PA	TL PA	208.438	107.24	65.1596	16.7625	191.676
418	M5	5B	2	12	TL	PA	TL PA	253.309	130.445	80.9368	37.7797	215.529
419	M5	5B	2	12	TL	PA	TL PA	169.235	91.1995	35.1714	16.404	152.831
420	M5	5B	2	12	TL	PA	TL PA	250.531	127.237	90.8293	37.8629	212.669
421	M5	5B	2	12	TL	PA	TL PA	227.696	118.932	67.811	30.249	197.447
422	M5	5B	2	12	TL	PA	TL PA	249.696	126.255	88.6466	41.2919	208.404
423	M5	5B	2	12	TL	PA	TL PA	202.83	108.872	64.7247	30.4868	172.343
424	M5	5B	2	12	TL	PA	TL PA	334.537	185.478	129.043	61.2761	273.261
425	M5	5B	2	12	TL	PA	TL PA	286.145	149.733	94.2713	37.6257	248.52
426	M5	5B	2	12	TL	PA	TL PA	283.698	158.795	102.937	41.8458	241.853
427	M5	5B	2	12	TL	PA	TL PA	255.888	132.882	89.4772	36.0363	219.852
428	M5	5B	2	12	TL	PA	TL PA	260.395	146.656	109.754	49.0386	211.357
429	M5	5B	2	12	TL	PA	TL PA	221.222	112.667	83.3046	41.8633	179.358
430	M5	5B	2	12	TL	PA	TL PA	283.97	143.456	111.25	46.1528	237.817
431	M5	5B	2	12	TL	PA	TL PA	224.736	123.062	61.9204	33.8067	190.93
432	M5	5B	2	12	TL	PA	TL PA	215.813	104.615	56.9784	32.8145	182.999
433	M6	6A	1	12	TL	PL	TL PL	270.634	141.532	98.9077	44.0889	226.545
434	M6	6A	1	12	TL	PL	TL PL	285.951	178.57	147.971	74.3942	211.557
435	M6	6A	1	12	TL	PL	TL PL	324.917	162.363	143.824	39.5724	285.345
436	M6	6A	1	12	TL	PL	TL PL	269.468	128.742	116.295	30.6777	238.79
437	M6	6A	1	12	TL	PL	TL PL	304.723	174.421	120.005	43.126	261.596
438	M6	6A	1	12	TL	PL	TL PL	252.918	157.229	107.184	47.3625	205.555
439	M6	6A	1	12	TL	PL	TL PL	251.344	147.714	110.8	31.9729	219.371
440	M6	6A	1	12	TL	PL	TL PL	219.563	114.737	68.8146	28.0242	191.539
441	M6	6B	2	12	TL	PL	TL PL	334.789	175.445	99.5501	62.6789	272.111
442	M6	6B	2	12	TL	PL	TL PL	209.046	108.842	59.8626	27.1965	181.849
443	M6	6B	2	12	TL	PL	TL PL	165.811	88.0183	33.6916	21.837	143.974
444	M6	6B	2	12	TL	PL	TL PL	162.701	81.8578	25.7022	17.0111	145.69
445	M6	6B	2	12	TL	PL	TL PL	165.371	79.307	24.4038	19.8513	145.52
446	M6	6B	2	12	TL	PL	TL PL	184.686	93.76	45.4018	22.5463	162.14
447	M6	6B	2	12	TL	PL	TL PL	232.993	121.304	57.9466	33.816	199.177
448	M6	6B	2	12	TL	PL	TL PL	153.668	80.5947	NA	NA	153.668
449	M6	6B	2	12	TL	PL	TL PL	179.272	90.5593	48.9602	14.0121	165.259
450	M6	6B	2	12	TL	PL	TL PL	176.576	93.526	42.241	19.5316	157.045
451	M6	6B	2	12	TL	PL	TL PL	364.329	206.46	116.695	55.5217	308.807
452	M6	6B	2	12	TL	PL	TL PL	209.189	116.094	56.314	23.6812	185.507
453	M6	6B	2	12	TL	PL	TL PL	205.566	107.514	51.1953	25.1844	180.381
454	M6	6B	2	12	TL	PL	TL PL	158.202	79.5463	37.0158	25.1102	133.092
455	M7	7A	1	12	TH	PL	TH PL	121.462	59.2912	17.2358	8.7054	112.756
456	M7	7A	1	12	TH	PL	TH PL	294.233	154.192	125.183	45.5556	248.677
457	M7	7A	1	12	TH	PL	TH PL	528.047	280.915	328.19	126.697	401.35
458	M7	7A	1	12	TH	PL	TH PL	453.234	211.919	277.548	174.1	279.134
459	M7	7A	1	12	TH	PL	TH PL	379.417	198.213	133.798	30.3106	349.106
460	M7	7A	1	12	TH	PL	TH PL	625.575	334.632	288.584	112.934	512.641
461	M7	7A	1	12	TH	PL	TH PL	210.502	115.193	53.8718	20.9629	189.539
462	M7	7A	1	12	TH	PL	TH PL	468.95	246.913	217.324	66.6859	402.264
463	M7	7A	1	12	TH	PL	TH PL	219.97	114.71	55.0888	20.762	199.208
464	M7	7A	1	12	TH	PL	TH PL	515.457	272.228	236.716	112.954	402.503
465	M7	7A	1	12	TH	PL	TH PL	603.798	306.043	272.13	131.216	472.582
466	M7	7A	1	12	TH	PL	TH PL	712.134	333.299	366.784	248.719	463.415
467	M7	7A	1	12	TH	PL	TH PL	415.242	223.221	154.846	43.1379	372.104
468	M7	7A	1	12	TH	PL	TH PL	971.148	471.387	510.444	362.569	608.579
469	M7	7A	1	12	TH	PL	TH PL	462.922	207.812	221.968	153.376	309.546
470	M7	7A	1	12	TH	PL	TH PL	597.731	277.59	290.894	202.833	394.898
471	M7	7A	1	12	TH	PL	TH PL	785.517	363.77	452.935	306.884	478.633
472	M7	7A	1	12	TH	PL	TH PL	257.284	131.406	87.0782	39.6952	217.589
473	M7	7A	1	12	TH	PL	TH PL	392.948	196.921	174.476	84.2062	308.742
474	M7	7A	1	12	TH	PL	TH PL	717.222	342.959	448.248	307.909	409.314
475	M7	7A	1	12	TH	PL	TH PL	590.034	305.434	282.387	148.487	441.547
476	M7	7A	1	12	TH	PL	TH PL	575.102	294.846	313.289	181.658	393.443
477	M7	7A	1	12	TH	PL	TH PL	451.272	222.161	183.862	58.8101	392.462
478	M7	7A	1	12	TH	PL	TH PL	438.767	203.154	256.09	172.067	266.7
479	M7	7A	1	12	TH	PL	TH PL	105.31	54.1697	NA	NA	105.31
480	M7	7A	1	12	TH	PL	TH PL	112.682	56.7841	NA	NA	112.682
481	M7	7B	2	12	TH	PL	TH PL	341.042	200.86	82.1909	46.6633	294.378
482	M7	7B	2	12	TH	PL	TH PL	842.297	398.945	403.978	289.517	552.781
483	M7	7B	2	12	TH	PL	TH PL	760.903	378.316	369.603	192.425	568.478
484	M7	7B	2	12	TH	PL	TH PL	467.431	259.911	90.6198	48.5368	418.894
485	M7	7B	2	12	TH	PL	TH PL	1109.56	565.733	530.659	309.702	799.863
486	M7	7B	2	12	TH	PL	TH PL	749.99	385.529	422.72	290.69	459.3
487	M7	7B	2	12	TH	PL	TH PL	699.121	327.159	370.242	255.606	443.515
488	M7	7B	2	12	TH	PL	TH PL	757.57	412.231	316.817	147.292	610.278
489	M7	7B	2	12	TH	PL	TH PL	531.328	258.633	211.115	84.6614	446.667
490	M7	7B	2	12	TH	PL	TH PL	543.542	291.106	235.388	141.815	401.727
491	M7	7B	2	12	TH	PL	TH PL	741.604	407.744	323.252	153.214	588.39
492	M7	7B	2	12	TH	PL	TH PL	482.651	263.087	184.193	95.2035	387.447
493	M7	7B	2	12	TH	PL	TH PL	474.877	235.84	193.953	82.3105	392.567
494	M7	7B	2	12	TH	PL	TH PL	441.209	220.957	181.491	67.8098	373.4
495	M7	7B	2	12	TH	PL	TH PL	660.445	348.629	306.565	129.116	531.328
496	M7	7B	2	12	TH	PL	TH PL	121.237	56.8292	22.6752	16.8458	104.391
497	M7	7B	2	12	TH	PL	TH PL	133.686	68.0445	NA	NA	133.686
498	M7	7B	2	12	TH	PL	TH PL	123.745	62.3095	21.2526	9.1875	114.557
499	M5	5A	1	14	TL	PA	TL PA	296.948	163.965	159.349	85.1619	211.786
500	M5	5A	1	14	TL	PA	TL PA	503.984	256.771	242.615	117.686	386.298
501	M5	5A	1	14	TL	PA	TL PA	630.279	307.053	245.638	131.581	498.698
502	M5	5A	1	14	TL	PA	TL PA	692.831	354.319	310.246	170.961	521.871
503	M5	5A	1	14	TL	PA	TL PA	501.592	254.853	205.572	91.3852	410.207
504	M5	5A	1	14	TL	PA	TL PA	263.418	140.121	118.007	53.1967	210.222
505	M5	5A	1	14	TL	PA	TL PA	307.901	145.679	114.211	64.2514	243.65
506	M5	5A	1	14	TL	PA	TL PA	309.026	165.734	134.576	45.2681	263.758
507	M5	5A	1	14	TL	PA	TL PA	349.865	187.162	127.848	32.3931	317.472
508	M5	5A	1	14	TL	PA	TL PA	481.121	239.466	214.889	79.2291	401.892
509	M5	5B	2	14	TL	PA	TL PA	327.012	165.306	131.817	58.1555	268.857
510	M5	5B	2	14	TL	PA	TL PA	407.619	212.476	169.559	53.2668	354.352
511	M5	5B	2	14	TL	PA	TL PA	370.986	191.431	136.397	39.2182	331.767
512	M5	5B	2	14	TL	PA	TL PA	358.097	193.469	156.164	74.3711	283.725
513	M5	5B	2	14	TL	PA	TL PA	333.244	182.274	140.785	54.118	279.126
514	M5	5B	2	14	TL	PA	TL PA	473.33	236.813	229.199	135.209	338.121
515	M5	5B	2	14	TL	PA	TL PA	761.253	376.176	342.924	168.841	592.412
516	M5	5B	2	14	TL	PA	TL PA	475.747	236.632	189.236	74.4638	401.284
517	M5	5B	2	14	TL	PA	TL PA	630.093	328.452	290.397	113.543	516.55
518	M5	5B	2	14	TL	PA	TL PA	487.668	241.334	238.837	126.82	360.849
519	M5	5B	2	14	TL	PA	TL PA	325.241	174.029	130.269	73.6914	251.549
520	M5	5B	2	14	TL	PA	TL PA	736.761	382.335	330.025	120.927	615.834
521	M5	5B	2	14	TL	PA	TL PA	467.063	234.365	179.16	75.0352	392.027
522	M6	6A	1	14	TL	PL	TL PL	537.533	264.295	267.785	164.566	372.967
523	M6	6A	1	14	TL	PL	TL PL	400.341	215.703	154.634	64.6889	335.652
524	M6	6A	1	14	TL	PL	TL PL	405.402	221.151	171.72	48.515	356.887
525	M6	6A	1	14	TL	PL	TL PL	500.297	282.78	213.821	71.3801	428.917
526	M6	6A	1	14	TL	PL	TL PL	705.347	325.867	459.572	333.976	371.372
527	M6	6A	1	14	TL	PL	TL PL	254.437	146.805	83.0454	36.5744	217.863
528	M6	6A	1	14	TL	PL	TL PL	559.301	286.29	277.377	174.505	384.797
529	M6	6A	1	14	TL	PL	TL PL	647.069	342.787	305.323	207.614	439.455
530	M6	6A	1	14	TL	PL	TL PL	493.152	254.437	204.367	93.3266	399.825
531	M6	6A	1	14	TL	PL	TL PL	536.093	261.762	264.474	148.436	387.657
532	M6	6A	1	14	TL	PL	TL PL	582.514	301.335	243.366	145.197	437.317
533	M6	6A	1	14	TL	PL	TL PL	743.501	359.035	474.166	317.401	426.101
534	M6	6A	1	14	TL	PL	TL PL	586.739	306.043	250.718	148.256	438.483
535	M6	6A	1	14	TL	PL	TL PL	513.347	304.319	233.186	140.027	373.32
536	M6	6A	1	14	TL	PL	TL PL	353.351	193.134	161.223	70.7527	282.599
537	M6	6A	1	14	TL	PL	TL PL	687.19	311.282	328.311	337.517	349.672
538	M6	6A	1	14	TL	PL	TL PL	418.323	210.797	230.609	181.976	236.347
539	M6	6A	1	14	TL	PL	TL PL	794.01	371.855	461.927	242.117	551.893
540	M6	6A	1	14	TL	PL	TL PL	714.055	331.68	390.166	223.367	490.688
541	M6	6A	1	14	TL	PL	TL PL	729.704	330.072	441.056	266.489	463.214
542	M6	6A	1	14	TL	PL	TL PL	589.065	348.404	255.498	111.87	477.195
543	M6	6A	1	14	TL	PL	TL PL	506.943	263.178	214.709	79.3852	427.558
544	M6	6A	1	14	TL	PL	TL PL	405.227	212.915	196.899	61.7328	343.495
545	M6	6A	1	14	TL	PL	TL PL	463.354	214.584	210.387	112.4	350.954
546	M6	6A	1	14	TL	PL	TL PL	568.898	298.878	240.194	132.231	436.666
547	M6	6A	1	14	TL	PL	TL PL	498.422	254.157	243.159	145.094	353.328
548	M6	6A	1	14	TL	PL	TL PL	313.464	165.836	147.992	55.8719	257.593
549	M6	6A	1	14	TL	PL	TL PL	236.548	131.174	86.6242	38.3278	198.22
550	M6	6A	1	14	TL	PL	TL PL	434.161	232.312	195.227	103.023	331.139
551	M6	6A	1	14	TL	PL	TL PL	546.18	302.593	272.559	140.726	405.454
552	M6	6A	1	14	TL	PL	TL PL	679.192	318.903	314.212	187.483	491.709
553	M6	6B	2	14	TL	PL	TL PL	368.595	183.197	142.552	49.3718	319.223
554	M6	6B	2	14	TL	PL	TL PL	774.451	314.276	505.764	349.622	424.829
555	M6	6B	2	14	TL	PL	TL PL	428.392	235.961	157.568	51.6666	376.725
556	M6	6B	2	14	TL	PL	TL PL	359.035	189.027	135.89	56.0808	302.954
557	M6	6B	2	14	TL	PL	TL PL	419.207	217.337	183.117	83.6893	335.518
558	M6	6B	2	14	TL	PL	TL PL	357.05	194.12	135.389	61.8105	295.24
559	M6	6B	2	14	TL	PL	TL PL	210.776	453.351	202.231	101.549	109.227
560	M6	6B	2	14	TL	PL	TL PL	421.266	189.453	206.665	131.129	290.137
561	M6	6B	2	14	TL	PL	TL PL	303.779	172.256	111.317	48.1479	255.631
562	M6	6B	2	14	TL	PL	TL PL	403.428	225.65	149.69	58.5422	344.886
563	M7	7A	1	14	TH	PL	TH PL	345.699	184.773	103.807	50.3997	295.3
564	M7	7A	1	14	TH	PL	TH PL	595.855	271.29	282.806	150.089	445.766
565	M7	7A	1	14	TH	PL	TH PL	448.654	238.636	174.798	44.728	403.926
566	M7	7A	1	14	TH	PL	TH PL	391.159	227.877	170.056	44.6456	346.513
567	M7	7A	1	14	TH	PL	TH PL	137.898	60.4981	NA	NA	137.898
568	M7	7A	1	14	TH	PL	TH PL	123.326	64.7863	28.4413	18.4385	104.887
569	M7	7A	1	14	TH	PL	TH PL	469.337	229.559	226.242	65.68	403.657
570	M7	7A	1	14	TH	PL	TH PL	137.284	67.6217	NA	NA	137.284
571	M7	7A	1	14	TH	PL	TH PL	126.673	60.0027	47.679	20.166	106.507
572	M7	7A	1	14	TH	PL	TH PL	124.825	59.7164	23.359	14.0121	110.813
573	M7	7A	1	14	TH	PL	TH PL	140.165	75.8996	37.4075	11.5893	128.576
574	M7	7A	1	14	TH	PL	TH PL	142.689	67.2205	34.4344	14.3573	128.331
575	M7	7A	1	14	TH	PL	TH PL	152.653	75.8575	36.8851	10.4365	142.216
576	M7	7A	1	14	TH	PL	TH PL	138.657	74.8415	35.2111	16.3399	122.317
577	M7	7A	1	14	TH	PL	TH PL	135.06	63.1034	39.3072	16.7347	118.326
578	M7	7A	1	14	TH	PL	TH PL	129.66	68.7163	26.5939	9.2885	120.371
579	M7	7A	1	14	TH	PL	TH PL	112.963	61.8116	30.799	9.524	103.439
580	M7	7A	1	14	TH	PL	TH PL	135.653	68.5804	27.8656	14.4705	121.183
581	M7	7A	1	14	TH	PL	TH PL	122.924	62.961	21.4437	17.808	105.115
582	M7	7A	1	14	TH	PL	TH PL	136.645	74.6996	29.3968	17.808	118.837
583	M7	7A	1	14	TH	PL	TH PL	122.248	61.8267	28.2066	17.1272	105.121
584	M7	7A	1	14	TH	PL	TH PL	122.941	60.3437	20.0093	14.5589	108.382
585	M7	7A	1	14	TH	PL	TH PL	125.924	68.0942	38.5586	16.6789	109.245
586	M7	7A	1	14	TH	PL	TH PL	127.556	63.5966	29.7868	10.6235	116.932
587	M7	7A	1	14	TH	PL	TH PL	124.974	60.8133	27.1106	11.8381	113.136
588	M7	7A	1	14	TH	PL	TH PL	116.772	60.999	NA	NA	116.772
589	M7	7A	1	14	TH	PL	TH PL	134.532	68.6127	22.2181	15.3388	119.193
590	M7	7A	1	14	TH	PL	TH PL	131.945	71.6646	40.9972	13.4257	118.519
591	M7	7A	1	14	TH	PL	TH PL	133.342	75.8996	45.6528	14.5268	118.815
592	M7	7A	1	14	TH	PL	TH PL	115.177	65.6729	29.6495	14.3329	100.844
593	M7	7A	1	14	TH	PL	TH PL	124.741	68.9872	29.865	12.5922	112.148
594	M7	7A	1	14	TH	PL	TH PL	116.656	63.2437	NA	NA	116.656
595	M7	7A	1	14	TH	PL	TH PL	130.719	66.3669	32.8506	12.0722	118.647
596	M7	7A	1	14	TH	PL	TH PL	108.34	57.8903	NA	NA	108.34
597	M7	7A	1	14	TH	PL	TH PL	100.278	54.1611	NA	NA	100.278
598	M7	7A	1	14	TH	PL	TH PL	97.93	52.1877	NA	NA	97.93
599	M7	7A	1	14	TH	PL	TH PL	109.491	64.2078	NA	NA	109.491
600	M7	7A	1	14	TH	PL	TH PL	110.162	55.1098	NA	NA	110.162
601	M7	7A	1	14	TH	PL	TH PL	97.7918	61.8173	NA	NA	97.7918
602	M7	7A	1	14	TH	PL	TH PL	105.31	56.5454	NA	NA	105.31
603	M7	7B	2	14	TH	PL	TH PL	585.514	244.061	268.881	148.214	437.3
604	M7	7B	2	14	TH	PL	TH PL	848.206	398.153	372.708	178.131	670.075
605	M7	7B	2	14	TH	PL	TH PL	521.699	265.298	211.599	35.6261	486.073
606	M7	7B	2	14	TH	PL	TH PL	841.329	415.586	369.3	181.658	659.671
607	M7	7B	2	14	TH	PL	TH PL	771.281	360.687	340.254	168.15	603.131
608	M7	7B	2	14	TH	PL	TH PL	826.962	422.147	360.43	153.202	673.76
609	M7	7B	2	14	TH	PL	TH PL	753.059	354.462	334.217	149.231	603.828
610	M7	7B	2	14	TH	PL	TH PL	326.915	181.046	114.22	33.4348	293.48
611	M7	7B	2	14	TH	PL	TH PL	432.097	218.79	174.84	77.584	354.513
612	M7	7B	2	14	TH	PL	TH PL	381.87	218.282	105.078	39.9855	341.884
613	M7	7B	2	14	TH	PL	TH PL	139.729	71.4804	38.4424	18.3846	121.344
614	M7	7B	2	14	TH	PL	TH PL	632.361	305.605	222.031	81.9836	550.377
615	M7	7B	2	14	TH	PL	TH PL	464.986	261.566	144.671	58.5916	406.395
616	M7	7B	2	14	TH	PL	TH PL	142.256	64.333	26.0804	11.1169	131.139
617	M7	7B	2	14	TH	PL	TH PL	151.669	71.5865	34.1727	14.5989	137.07
618	M7	7B	2	14	TH	PL	TH PL	127.418	60.8516	NA	NA	127.418
619	M7	7B	2	14	TH	PL	TH PL	64.3403	129.08	30.799	11.0115	53.3288
620	M7	7B	2	14	TH	PL	TH PL	151.606	76.6942	33.4694	16.6299	134.976
621	M7	7B	2	14	TH	PL	TH PL	122.882	62.2009	NA	NA	122.882
622	M7	7B	2	14	TH	PL	TH PL	132.882	67.3712	23.4238	15.5876	117.295
623	M7	7B	2	14	TH	PL	TH PL	329.64	181.864	113.634	66.5266	263.114
624	M7	7B	2	14	TH	PL	TH PL	134.882	75.961	30.4258	18.2222	116.659
625	M7	7B	2	14	TH	PL	TH PL	120.503	64.8223	31.3134	9.0211	111.482
626	M7	7B	2	14	TH	PL	TH PL	127.783	63.133	24.9284	10.2322	117.551
627	M7	7B	2	14	TH	PL	TH PL	138.239	67.5026	28.7997	12.9572	125.281
628	M7	7B	2	14	TH	PL	TH PL	142.799	72.1171	33.179	17.4108	125.388
629	M7	7B	2	14	TH	PL	TH PL	748.752	343.157	382.031	252.325	496.427
630	M7	7B	2	14	TH	PL	TH PL	144.68	77.9727	29.865	16.5314	128.149
631	M7	7B	2	14	TH	PL	TH PL	131.837	68.0256	NA	NA	131.837
632	M7	7B	2	14	TH	PL	TH PL	129.879	64.42	35.3301	15.163	114.716
633	M7	7B	2	14	TH	PL	TH PL	127.484	60.9129	20.629	10.0482	117.435
634	M7	7B	2	14	TH	PL	TH PL	138.751	70.3179	25.4972	13.7432	125.008
635	M7	7B	2	14	TH	PL	TH PL	132.253	67.9347	37.4075	15.5202	116.733
636	M7	7B	2	14	TH	PL	TH PL	648.072	295.635	269.979	87.907	560.165
637	M7	7B	2	14	TH	PL	TH PL	131.666	68.8383	29.7084	15.3995	116.266
638	M5	5A	1	16	TL	PA	TL PA	563.338	284.617	264.291	100.644	462.694
639	M5	5A	1	16	TL	PA	TL PA	436.593	224.106	162.158	53.4445	383.148
640	M5	5A	1	16	TL	PA	TL PA	297.56	152.466	120.238	43.0514	254.509
641	M5	5A	1	16	TL	PA	TL PA	277.797	133.158	88.1454	26.3606	251.436
642	M5	5A	1	16	TL	PA	TL PA	265.259	142.612	98.892	21.1811	244.078
643	M5	5A	1	16	TL	PA	TL PA	705.837	297.106	355.546	227.298	478.539
644	M5	5A	1	16	TL	PA	TL PA	542.92	291.409	233.033	99.209	443.711
645	M5	5A	1	16	TL	PA	TL PA	485.683	211.733	217.428	108.745	376.938
646	M5	5A	1	16	TL	PA	TL PA	308.738	162.667	118.682	32.4505	276.287
647	M5	5A	1	16	TL	PA	TL PA	104.915	53.6419	NA	NA	104.915
648	M5	5B	2	16	TL	PA	TL PA	512.722	269.286	211.472	90.7427	421.979
649	M5	5B	2	16	TL	PA	TL PA	404.5	182.221	196.96	87.1329	317.368
650	M5	5B	2	16	TL	PA	TL PA	798.471	397.63	340.245	212.076	586.395
651	M5	5B	2	16	TL	PA	TL PA	512.727	273.785	222.006	122.426	390.302
652	M5	5B	2	16	TL	PA	TL PA	810.576	355.975	360.819	241.49	569.086
653	M5	5B	2	16	TL	PA	TL PA	453.635	242.08	216.034	91.6554	361.98
654	M5	5B	2	16	TL	PA	TL PA	642.569	287.316	338.212	216.899	425.67
655	M5	5B	2	16	TL	PA	TL PA	609.565	300.663	293.286	149.394	460.171
656	M6	6A	1	16	TL	PL	TL PL	552.5	272.228	222.888	106.507	445.993
657	M6	6A	1	16	TL	PL	TL PL	447.114	208.97	211.725	97.0737	350.04
658	M6	6A	1	16	TL	PL	TL PL	416.321	217.063	161.389	31.6978	384.624
659	M6	6A	1	16	TL	PL	TL PL	721.592	327.368	353.789	227.756	493.837
660	M6	6A	1	16	TL	PL	TL PL	612.266	307.38	284.572	134.195	478.07
661	M6	6A	1	16	TL	PL	TL PL	712.25	325.035	370.124	180.796	531.454
662	M6	6A	1	16	TL	PL	TL PL	817.543	392.937	383.442	253.771	563.773
663	M6	6A	1	16	TL	PL	TL PL	125.704	60.7308	15.9864	9.955	115.749
664	M6	6A	1	16	TL	PL	TL PL	478.626	233.303	226.763	70.4025	408.223
665	M6	6A	1	16	TL	PL	TL PL	523.452	253.036	228.891	66.3581	457.094
666	M6	6A	1	16	TL	PL	TL PL	629.582	331.757	254.486	125.84	503.741
667	M6	6A	1	16	TL	PL	TL PL	817.475	384.979	410.687	202.064	615.411
668	M6	6A	1	16	TL	PL	TL PL	829.29	357.339	448.66	280.999	548.291
669	M6	6B	2	16	TL	PL	TL PL	842.634	345.705	493.195	361.714	480.92
670	M6	6B	2	16	TL	PL	TL PL	983.918	448.663	535.04	381.83	602.087
671	M6	6B	2	16	TL	PL	TL PL	920.936	397.011	453.07	267.953	652.983
672	M6	6B	2	16	TL	PL	TL PL	473.831	238.333	198.604	109.896	363.935
673	M6	6B	2	16	TL	PL	TL PL	359.82	197.247	161.274	62.4923	297.328
674	M6	6B	2	16	TL	PL	TL PL	357.711	206.981	144.038	62.804	294.907
675	M6	6B	2	16	TL	PL	TL PL	122.665	61.8776	NA	NA	122.665
676	M6	6B	2	16	TL	PL	TL PL	708.4	307.231	397.208	281.649	426.751
677	M6	6B	2	16	TL	PL	TL PL	857	369.67	495.703	373.31	483.69
678	M6	6B	2	16	TL	PL	TL PL	960.377	437.19	563.212	337.01	623.367
679	M6	6B	2	16	TL	PL	TL PL	700.361	318.726	355.397	218.209	482.151
680	M6	6B	2	16	TL	PL	TL PL	672.556	337.184	348.462	161.304	511.251
681	M6	6B	2	16	TL	PL	TL PL	391.289	199.021	168.845	57.4454	333.844
682	M6	6B	2	16	TL	PL	TL PL	569.454	263.781	259.649	87.0809	482.373
683	M6	6B	2	16	TL	PL	TL PL	436.416	199.691	138.177	24.9572	411.459
684	M6	6B	2	16	TL	PL	TL PL	428.3	226.708	201.529	75.5732	352.727
685	M7	7A	1	16	TH	PL	TH PL	437.123	225.868	179.192	49.7244	387.398
686	M7	7A	1	16	TH	PL	TH PL	131.106	70.1935	20.7698	19.1031	112.003
687	M7	7A	1	16	TH	PL	TH PL	127.637	66.5791	27.7986	16.1965	111.441
688	M7	7A	1	16	TH	PL	TH PL	132.51	70.2715	27.2351	14.7182	117.792
689	M7	7A	1	16	TH	PL	TH PL	115.596	59.4581	NA	NA	115.596
690	M7	7A	1	16	TH	PL	TH PL	125.296	64.3602	NA	NA	125.296
691	M7	7A	1	16	TH	PL	TH PL	137.985	73.0185	41.4835	18.9314	119.053
692	M7	7A	1	16	TH	PL	TH PL	142.57	73.1907	23.259	13.8362	128.734
693	M7	7A	1	16	TH	PL	TH PL	127.517	69.0548	27.7104	16.2253	111.291
694	M7	7A	1	16	TH	PL	TH PL	129.591	71.0109	18.3561	11.2005	118.39
695	M7	7A	1	16	TH	PL	TH PL	138.632	65.7864	27.6725	12.9572	125.675
696	M7	7A	1	16	TH	PL	TH PL	118.932	62.3282	NA	NA	118.932
697	M7	7A	1	16	TH	PL	TH PL	159.005	74.4354	30.8595	20.1023	138.903
698	M7	7A	1	16	TH	PL	TH PL	154.48	77.7226	26.134	19.0481	135.432
699	M7	7A	1	16	TH	PL	TH PL	151.634	72.3254	29.865	15.163	136.471
700	M7	7A	1	16	TH	PL	TH PL	140.201	66.0128	26.0043	17.808	122.393
701	M7	7A	1	16	TH	PL	TH PL	143.407	71.9164	28.9733	16.4466	126.961
702	M7	7A	1	16	TH	PL	TH PL	108.65	53.3215	NA	NA	108.65
703	M7	7A	1	16	TH	PL	TH PL	114.635	56.6134	NA	NA	114.635
704	M7	7B	2	16	TH	PL	TH PL	120.812	58.0953	NA	NA	120.812
705	M7	7B	2	16	TH	PL	TH PL	154.387	77.6025	22.26	12.5551	141.832
706	M7	7B	2	16	TH	PL	TH PL	148.002	68.5974	NA	NA	148.002
707	M7	7B	2	16	TH	PL	TH PL	141.724	68.5719	18.3243	10.8515	130.873
708	M7	7B	2	16	TH	PL	TH PL	146.539	76.4125	21.5792	11.6295	134.91
709	M7	7B	2	16	TH	PL	TH PL	150.767	83.0625	24.3176	17.0111	133.756
710	M7	7B	2	16	TH	PL	TH PL	147.088	69.8738	22.634	7.7262	139.362
711	M7	7B	2	16	TH	PL	TH PL	128.882	61.2355	17.5508	10.7218	118.16
712	M7	7B	2	16	TH	PL	TH PL	145.986	68.7604	NA	NA	145.986
713	M7	7B	2	16	TH	PL	TH PL	150.544	72.5941	23.4238	15.4599	135.084
714	M7	7B	2	16	TH	PL	TH PL	139.287	65.8501	18.1453	13.9035	125.383
715	M7	7B	2	16	TH	PL	TH PL	152.877	76.7854	33.8022	18.2797	134.597
716	M7	7B	2	16	TH	PL	TH PL	155.535	81.6896	24.5941	16.8181	138.717
717	M7	7B	2	16	TH	PL	TH PL	158.92	82.25	28.2974	17.0727	141.847
718	M7	7B	2	16	TH	PL	TH PL	430.845	195.376	185.382	95.5925	335.253
719	M7	7B	2	16	TH	PL	TH PL	290.97	149.907	120.196	37.504	253.466
720	M7	7B	2	16	TH	PL	TH PL	219.913	109.661	87.1236	17.7293	202.184
721	M7	7B	2	16	TH	PL	TH PL	354.509	164.763	153.373	67.085	287.424
722	M7	7B	2	16	TH	PL	TH PL	132.315	60.8746	21.4328	12.0722	120.243
723	M7	7B	2	16	TH	PL	TH PL	150.321	69.2419	38.7576	12.7486	137.573
724	M7	7B	2	16	TH	PL	TH PL	120.395	53.1485	43.7914	19.3155	101.08
725	M7	7B	2	16	TH	PL	TH PL	116.425	57.3256	16.4182	14.4866	101.939
726	M7	7B	2	16	TH	PL	TH PL	145.922	69.1897	31.746	18.6335	127.288
727	M7	7B	2	16	TH	PL	TH PL	129.774	65.7332	15.7661	13.136	116.638
728	M7	7B	2	16	TH	PL	TH PL	146.754	74.4651	24.2456	12.9752	133.779
729	M7	7B	2	16	TH	PL	TH PL	143.821	67.8832	29.0737	15.4826	128.338
730	M7	7B	2	16	TH	PL	TH PL	167.225	76.3163	32.1837	17.3907	149.835
731	M7	7B	2	16	TH	PL	TH PL	104.877	57.3907	NA	NA	104.877
732	M7	7B	2	16	TH	PL	TH PL	118.853	59.886	NA	NA	118.853
733	M7	7B	2	16	TH	PL	TH PL	115.284	54.3931	NA	NA	115.284
734	M5	5A	1	19	TL	PA	TL PA	135.31	68.1301	25.4835	19.5376	115.772
735	M5	5A	1	19	TL	PA	TL PA	186.501	95.0899	33.5425	20.1718	166.329
736	M5	5A	1	19	TL	PA	TL PA	142.567	67.6113	30.1448	21.9488	120.618
737	M5	5A	1	19	TL	PA	TL PA	642.277	291.09	262.885	77.0264	565.251
738	M5	5A	1	19	TL	PA	TL PA	584.815	273.888	280.242	143.904	440.911
739	M5	5A	1	19	TL	PA	TL PA	502.517	256.244	261.923	83.0175	419.499
740	M5	5A	1	19	TL	PA	TL PA	162.483	84.7246	27.6556	22.8952	139.588
741	M5	5A	1	19	TL	PA	TL PA	182.591	92.8855	29.1978	23.9115	158.679
742	M5	5B	2	19	TL	PA	TL PA	699.97	354.2	240.494	54.6585	645.312
743	M5	5B	2	19	TL	PA	TL PA	772.937	391.189	357.929	182.034	590.903
744	M5	5B	2	19	TL	PA	TL PA	535.031	278.582	246.37	68.5994	466.432
745	M5	5B	2	19	TL	PA	TL PA	769.348	393.081	331.931	109.896	659.452
746	M5	5B	2	19	TL	PA	TL PA	712.679	322.785	389.115	232.287	480.392
747	M5	5B	2	19	TL	PA	TL PA	136.747	70.8548	23.4686	19.1336	117.614
748	M5	5B	2	19	TL	PA	TL PA	154.15	72.533	24.3607	13.0469	141.104
749	M5	5B	2	19	TL	PA	TL PA	124.569	56.7286	16.7417	14.037	110.532
750	M5	5B	2	19	TL	PA	TL PA	140.307	69.8905	24.0573	10.1865	130.121
751	M5	5B	2	19	TL	PA	TL PA	129.368	67.2517	20.3043	14.6864	114.682
752	M5	5B	2	19	TL	PA	TL PA	130.848	64.6205	NA	NA	130.848
753	M5	5B	2	19	TL	PA	TL PA	139.596	67.6061	25.7203	11.3144	128.281
754	M5	5B	2	19	TL	PA	TL PA	117.89	60.3224	20.629	13.417	104.473
755	M5	5B	2	19	TL	PA	TL PA	141.756	67.3833	25.3505	19.1214	122.634
756	M5	5B	2	19	TL	PA	TL PA	156.784	73.8876	22.9183	13.0117	143.773
757	M5	5B	2	19	TL	PA	TL PA	126.163	61.3554	NA	NA	126.163
758	M6	6A	1	19	TL	PL	TL PL	151.742	76.0592	24.4038	19.3155	132.427
759	M6	6A	1	19	TL	PL	TL PL	137.215	59.605	NA	NA	137.215
760	M6	6A	1	19	TL	PL	TL PL	158.494	71.0355	18.8078	18.9314	139.562
761	M6	6A	1	19	TL	PL	TL PL	150.971	78.2518	27.2137	20.3731	130.597
762	M6	6B	2	19	TL	PL	TL PL	176.906	87.4549	37.7148	19.91	156.996
763	M6	6B	2	19	TL	PL	TL PL	142.266	65.1166	27.8573	18.5079	123.758
764	M6	6B	2	19	TL	PL	TL PL	171.038	87.6786	33.0064	25.0544	145.984
765	M6	6B	2	19	TL	PL	TL PL	232.183	117.655	44.4677	28.9894	203.193
766	M6	6B	2	19	TL	PL	TL PL	155.61	82.1763	28.7146	22.5463	133.064
767	M6	6B	2	19	TL	PL	TL PL	173.351	86.8126	33.9261	16.5314	156.82
768	M6	6B	2	19	TL	PL	TL PL	179.879	94.907	30.5405	23.0374	156.841
769	M6	6B	2	19	TL	PL	TL PL	155.295	73.7098	20.8929	20.5327	134.763
770	M6	6B	2	19	TL	PL	TL PL	188.7	93.4611	34.8885	18.4511	170.249
771	M6	6B	2	19	TL	PL	TL PL	130.011	82.5161	NA	NA	130.011
772	M6	6B	2	19	TL	PL	TL PL	181.864	87.7158	27.6725	21.7031	160.161
773	M6	6B	2	19	TL	PL	TL PL	190.346	96.6646	30.326	18.752	171.595
774	M6	6B	2	19	TL	PL	TL PL	167.18	75.9533	33.4694	12.2923	154.888
775	M6	6B	2	19	TL	PL	TL PL	168.768	80.1828	23.5182	20.0965	148.672
776	M6	6B	2	19	TL	PL	TL PL	231.885	116.875	43.7274	31.4434	200.442
777	M6	6B	2	19	TL	PL	TL PL	160.322	84.6916	22.0442	14.7419	145.58
778	M6	6B	2	19	TL	PL	TL PL	134.933	64.9301	24.7548	15.6026	119.33
779	M6	6B	2	19	TL	PL	TL PL	156.935	79.1054	25.4972	20.4872	136.448
780	M6	6B	2	19	TL	PL	TL PL	209.202	106.253	29.0537	25.5703	183.632
781	M6	6B	2	19	TL	PL	TL PL	184.474	89.0403	31.9729	26.0938	158.38
782	M6	6B	2	19	TL	PL	TL PL	211.706	117.829	72.3818	30.3106	181.395
783	M6	6B	2	19	TL	PL	TL PL	133.379	69.9272	22.4686	19.2248	114.154
784	M6	6B	2	19	TL	PL	TL PL	189.273	92.3619	30.1873	28.9894	160.283
785	M6	6B	2	19	TL	PL	TL PL	162.896	77.8635	36.4445	20.6459	142.25
786	M6	6B	2	19	TL	PL	TL PL	181.003	95.358	41.2297	15.2473	165.756
787	M6	6B	2	19	TL	PL	TL PL	157.706	85.9542	27.6556	15.2702	142.436
788	M6	6B	2	19	TL	PL	TL PL	171.463	83.1747	32.465	23.5776	147.885
789	M6	6B	2	19	TL	PL	TL PL	163.776	79.558	41.5733	15.4826	148.293
790	M6	6B	2	19	TL	PL	TL PL	142.546	81.9091	39.6086	22.2128	120.333
791	M6	6B	2	19	TL	PL	TL PL	190.376	93.2613	31.9291	30.0013	160.375
792	M6	6B	2	19	TL	PL	TL PL	136.394	67.921	18.2222	22.4634	113.93
793	M6	6B	2	19	TL	PL	TL PL	157.217	81.9091	39.2182	19.5555	137.662
794	M6	6B	2	19	TL	PL	TL PL	197.534	97.5435	54.0576	27.4525	170.082
795	M6	6B	2	19	TL	PL	TL PL	144.947	77.1897	24.6226	17.4108	127.536
796	M6	6B	2	19	TL	PL	TL PL	145.554	69.9905	28.074	16.4182	129.136
797	M6	6B	2	19	TL	PL	TL PL	125.811	67.8592	NA	NA	125.811
798	M6	6B	2	19	TL	PL	TL PL	160.639	77.6956	39.7731	22.0442	138.595
799	M6	6B	2	19	TL	PL	TL PL	174.389	86.7696	48.2889	21.269	153.12
800	M6	6B	2	19	TL	PL	TL PL	190.716	101.554	56.8087	21.3784	169.338
801	M6	6B	2	19	TL	PL	TL PL	166.035	83.9782	47.5099	25.1102	140.925
802	M6	6B	2	19	TL	PL	TL PL	247.324	131.976	95.1181	33.8022	213.522
803	M6	6B	2	19	TL	PL	TL PL	181.661	89.781	44.3206	26.076	155.585
804	M6	6B	2	19	TL	PL	TL PL	196.91	101.425	39.82	24.7359	172.174
805	M6	6B	2	19	TL	PL	TL PL	158.399	80.8143	38.4617	14.4059	143.993
806	M6	6B	2	19	TL	PL	TL PL	222.534	124.379	46.8477	33.5946	188.939
807	M6	6B	2	19	TL	PL	TL PL	178.418	93.9786	41.9752	25.2768	153.141
808	M6	6B	2	19	TL	PL	TL PL	177.327	89.625	44.7396	19.91	157.417
809	M6	6B	2	19	TL	PL	TL PL	121.692	71.2322	NA	NA	121.692
810	M6	6B	2	19	TL	PL	TL PL	145.124	68.5906	NA	NA	145.124
811	M6	6B	2	19	TL	PL	TL PL	211.893	114.964	52.277	24.4324	187.461
812	M6	6B	2	19	TL	PL	TL PL	207.642	103.41	NA	NA	207.642
813	M6	6B	2	19	TL	PL	TL PL	205.284	99.9288	50.5997	26.7121	178.572
814	M6	6B	2	19	TL	PL	TL PL	171.183	82.8601	34.0222	15.0859	156.097
815	M6	6B	2	19	TL	PL	TL PL	171.773	80.0431	33.0346	20.6685	151.104
816	M6	6B	2	19	TL	PL	TL PL	176.874	85.6117	27.4865	19.0236	157.851
817	M6	6B	2	19	TL	PL	TL PL	137.263	71.4675	24.6226	23.0374	114.225
818	M6	6B	2	19	TL	PL	TL PL	213.725	109.572	47.0959	30.5405	183.185
819	M6	6B	2	19	TL	PL	TL PL	155.709	77.1958	21.5954	22.9562	132.753
820	M6	6B	2	19	TL	PL	TL PL	173.12	90.8293	37.1039	21.1811	151.939
821	M6	6B	2	19	TL	PL	TL PL	188.989	96.9681	37.6653	21.269	167.72
822	M6	6B	2	19	TL	PL	TL PL	136.202	66.6456	30.0013	21.1811	115.021
823	M6	6B	2	19	TL	PL	TL PL	169.507	92.9608	32.1039	25.3505	144.157
824	M6	6B	2	19	TL	PL	TL PL	174.528	92.0128	29.7516	16.0737	158.454
825	M6	6B	2	19	TL	PL	TL PL	144.834	70.2897	NA	NA	144.834
826	M7	7A	1	19	TH	PL	TH PL	226.456	110.361	43.7061	23.9894	202.466
827	M7	7A	1	19	TH	PL	TH PL	163.399	89.2757	36.7122	15.6026	147.797
828	M7	7A	1	19	TH	PL	TH PL	181.9	97.7775	29.9546	22.5463	159.354
829	M7	7A	1	19	TH	PL	TH PL	195.08	94.6462	43.0719	22.5463	172.534
830	M7	7A	1	19	TH	PL	TH PL	186.625	94.907	25.2768	19.5555	167.07
831	M7	7A	1	19	TH	PL	TH PL	236.097	113.26	40.8491	27.1106	208.986
832	M7	7A	1	19	TH	PL	TH PL	180.804	87.8433	33.6362	15.0859	165.718
833	M7	7A	1	19	TH	PL	TH PL	185.577	94.8214	NA	NA	185.577
834	M7	7B	2	19	TH	PL	TH PL	244.76	132.174	57.2014	18.5771	226.182
835	M7	7B	2	19	TH	PL	TH PL	522.036	264.286	199.577	54.0318	468.004
836	M7	7B	2	19	TH	PL	TH PL	168.3	80.8777	30.249	14.7419	153.559
837	M7	7B	2	19	TH	PL	TH PL	288.346	138.079	87.6945	25.9145	262.431
838	M7	7B	2	19	TH	PL	TH PL	224.331	120.877	34.1454	30.6929	193.638
839	M7	7B	2	19	TH	PL	TH PL	374.991	182.698	98.2296	32.8932	342.097
840	M7	7B	2	19	TH	PL	TH PL	310.85	158.647	93.3812	33.8573	276.993
841	M7	7B	2	19	TH	PL	TH PL	393.655	191.804	109.342	39.7848	353.87
842	M7	7B	2	19	TH	PL	TH PL	148.145	82.5161	17.1136	9.7059	138.44
843	M7	7B	2	19	TH	PL	TH PL	217.195	112.317	44.5934	26.0043	191.191
844	M7	7B	2	19	TH	PL	TH PL	254.475	132.1	85.4317	23.259	231.216
845	M7	7B	2	19	TH	PL	TH PL	422.981	223.479	117.975	36.9654	386.016
846	M7	7B	2	19	TH	PL	TH PL	128.887	59.9093	NA	NA	128.887
847	M7	7B	2	19	TH	PL	TH PL	205.202	104.915	NA	NA	205.202
848	M7	7B	2	19	TH	PL	TH PL	242.993	132.139	59.2912	34.5527	208.44
849	M7	7B	2	19	TH	PL	TH PL	286.068	150.937	89.0403	36.5595	249.508
850	M7	7B	2	19	TH	PL	TH PL	203.999	104.523	27.1965	23.6763	180.322
851	M7	7B	2	19	TH	PL	TH PL	225.695	121.68	63.3744	24.1444	201.55
852	M7	7B	2	19	TH	PL	TH PL	280.417	141.789	47.3625	32.3787	248.038
853	M7	7B	2	19	TH	PL	TH PL	218.957	123.699	36.8137	28.0242	190.933
854	M7	7B	2	19	TH	PL	TH PL	226.53	128.768	37.1039	26.6421	199.888
855	M7	7B	2	19	TH	PL	TH PL	161.657	85.5354	37.6157	18.6522	143.005
856	M7	7B	2	19	TH	PL	TH PL	302.586	158.52	95.7679	29.5629	273.023
857	M7	7B	2	19	TH	PL	TH PL	270.035	144.111	NA	NA	270.035
858	M7	7B	2	19	TH	PL	TH PL	306.645	176.78	65.7864	43.7274	262.917
859	M7	7B	2	19	TH	PL	TH PL	360.725	177.162	124.3	51.1862	309.539
860	M7	7B	2	19	TH	PL	TH PL	132.962	86.7481	24.7359	22.5463	110.416
861	M7	7B	2	19	TH	PL	TH PL	133.053	84.5759	22.2338	16.8665	116.187
862	M7	7B	2	19	TH	PL	TH PL	669.034	323.932	374.767	170.352	498.682
863	M7	7B	2	19	TH	PL	TH PL	343.883	171.64	117.432	39.7848	304.099
864	M7	7B	2	19	TH	PL	TH PL	256.041	128.597	43.4063	28.074	227.967
865	M7	7B	2	19	TH	PL	TH PL	538.908	269.623	211.646	53.1265	485.781
866	M7	7B	2	19	TH	PL	TH PL	566.512	254.101	308.809	162.435	404.078
867	M7	7B	2	19	TH	PL	TH PL	252.676	125.198	47.9594	37.7766	214.899
868	M7	7B	2	19	TH	PL	TH PL	212.177	105.818	51.4135	29.9858	182.191
869	M7	7B	2	19	TH	PL	TH PL	236.302	119.37	43.4063	32.8506	203.451
870	M7	7B	2	19	TH	PL	TH PL	398.86	203.101	84.067	35.115	363.745
871	M7	7B	2	19	TH	PL	TH PL	244.372	140.706	NA	NA	244.372
872	M7	7B	2	19	TH	PL	TH PL	554.667	290.738	226.454	69.2402	485.427
873	M7	7B	2	19	TH	PL	TH PL	227.009	116.319	39.9836	29.4205	197.589
874	M7	7B	2	19	TH	PL	TH PL	310.135	141.789	67.5768	40.7576	269.377
875	M7	7B	2	19	TH	PL	TH PL	221.845	115.962	35.3664	31.4434	190.402
876	M7	7B	2	19	TH	PL	TH PL	345.361	177.569	125.54	51.901	293.46
877	M7	7B	2	19	TH	PL	TH PL	318.585	163.456	120.645	47.9496	270.636
878	M7	7B	2	19	TH	PL	TH PL	244.344	124.679	53.954	33.8022	210.541
879	M7	7B	2	19	TH	PL	TH PL	210.854	112.13	44.8125	24.3751	186.479
880	M7	7B	2	19	TH	PL	TH PL	295.272	156.086	99.104	43.8446	251.428
881	M7	7B	2	19	TH	PL	TH PL	337.836	160.601	101.701	31.6798	306.156
882	M7	7B	2	19	TH	PL	TH PL	414.115	220.817	145.689	48.3275	365.787
883	M7	7B	2	19	TH	PL	TH PL	204.747	99.2122	55.3534	23.259	181.488
884	M7	7B	2	19	TH	PL	TH PL	283.945	151.119	78.2518	30.9048	253.041
885	M7	7B	2	19	TH	PL	TH PL	193.688	93.2163	30.8595	21.5954	172.093
886	M7	7B	2	19	TH	PL	TH PL	415.065	206.87	105.906	49.2546	365.811
887	M7	7B	2	19	TH	PL	TH PL	271.633	139.317	51.4316	24.6226	247.01
888	M7	7B	2	19	TH	PL	TH PL	181.654	95.3384	37.7148	19.3155	162.338
889	M7	7B	2	19	TH	PL	TH PL	445.827	230.198	151.603	44.5268	401.3
890	M7	7B	2	19	TH	PL	TH PL	288.353	138.235	48.208	39.2062	249.147
891	M7	7B	2	19	TH	PL	TH PL	462.978	241.579	110.159	44.2008	418.778
892	M7	7B	2	19	TH	PL	TH PL	190.112	98.3666	NA	NA	190.112
893	M7	7B	2	19	TH	PL	TH PL	126.55	72.6134	NA	NA	126.55
894	M7	7B	2	19	TH	PL	TH PL	126.62	71.9164	NA	NA	126.62
895	M7	7B	2	19	TH	PL	TH PL	119.108	72.2334	NA	NA	119.108
896	M7	7B	2	19	TH	PL	TH PL	126.988	72.0718	NA	NA	126.988
897	M7	7B	2	19	TH	PL	TH PL	125.896	76.1741	NA	NA	125.896
898	M7	7B	2	19	TH	PL	TH PL	137.538	88.6466	NA	NA	137.538

## Sheet: App Size Mean-stdev M5 to M7
Measure	Body length	Body width	Gonad length	Gonad width	Trunk length	Mesocosm	Day	temp	pH	Treatment.code	Replicate	M.= Mesocosm
mean	153.965	77.6036	29.9043	15.1514	138.814	5A	D1	TL	PA	TL PA	1	Measurments: values in µm
mean	188.857	98.2483	34.5457	23.524	170.561	5A	D2	TL	PA	TL PA	1	Trunk length = Body length - Gonad width
mean	385.984	203.717	161.061	61.5845	324.399	5A	D4	TL	PA	TL PA	1	TL= Temperature low, ambient fjord temperature
mean	588.654	295.702	266.158	135.403	453.251	5A	D6	TL	PA	TL PA	1	TH= targeted temperature +3C relative to TL
mean	620.465	316.527	261.186	116.498	503.967	5A	D8	TL	PA	TL PA	1	PA= Ambient pH
mean	158.808	81.3205	30.4916	15.5583	143.25	5A	D10	TL	PA	TL PA	1	PL= low pH
mean	240.383	126.935	79.8764	36.0836	204.299	5A	D12	TL	PA	TL PA	1
mean	433.697	221.512	187.295	87.1113	346.585	5A	D14	TL	PA	TL PA	1
mean	398.864	195.352	184.268	79.1538	327.625	5A	D16	TL	PA	TL PA	1
mean	317.383	153.708	118.884	51.5516	265.831	5A	D19	TL	PA	TL PA	1
stdev	23.9799	10.6574	5.81326	4.01412	22.3336	5A	D1	TL	PA	TL PA	1
stdev	34.9535	16.0136	8.43385	7.51061	30.829	5A	D2	TL	PA	TL PA	1
stdev	55.8813	31.7263	30.451	24.7355	44.8216	5A	D4	TL	PA	TL PA	1
stdev	93.1003	39.3018	64.9764	50.6521	59.6321	5A	D6	TL	PA	TL PA	1
stdev	248.166	116.818	108.96	82.529	188.942	5A	D8	TL	PA	TL PA	1
stdev	31.9663	18.5685	7.76818	5.19555	31.1254	5A	D10	TL	PA	TL PA	1
stdev	59.9029	32.0838	33.434	13.4029	49.9401	5A	D12	TL	PA	TL PA	1
stdev	150.438	72.7323	66.5943	42.746	114.318	5A	D14	TL	PA	TL PA	1
stdev	178.977	80.473	89.8862	65.1728	120.359	5A	D16	TL	PA	TL PA	1
stdev	218.552	100.329	123.913	45.7308	179.222	5A	D19	TL	PA	TL PA	1
mean	127.068	66.2238	21.8764	12.4523	121.408	5B	D1	TL	PA	TL PA	2
mean	213.064	109.789	55.478	26.1588	186.906	5B	D2	TL	PA	TL PA	2
mean	361.158	189.996	136.76	55.8182	305.339	5B	D4	TL	PA	TL PA	2
mean	560.385	283.779	258.735	122.882	437.503	5B	D6	TL	PA	TL PA	2
mean	919.389	430.341	443.549	270.818	648.572	5B	D8	TL	PA	TL PA	2
mean	162.969	87.9325	49.1169	19.821	143.148	5B	D10	TL	PA	TL PA	2
mean	251.7	132.702	85.2603	38.0873	213.612	5B	D12	TL	PA	TL PA	2
mean	473.393	242.699	204.982	89.82	383.573	5B	D14	TL	PA	TL PA	2
mean	593.096	288.62	272.379	151.477	441.619	5B	D16	TL	PA	TL PA	2
mean	311.759	154.517	126.385	55.3878	263.295	5B	D19	TL	PA	TL PA	2
stdev	28.4025	8.85775	6.24918	3.18672	28.6842	5B	D1	TL	PA	TL PA	2
stdev	34.3932	15.54	12.5816	7.55794	29.6536	5B	D2	TL	PA	TL PA	2
stdev	68.3586	34.2528	40.9144	21.3528	51.1614	5B	D4	TL	PA	TL PA	2
stdev	161.998	67.7895	96.7338	68.624	103.976	5B	D6	TL	PA	TL PA	2
stdev	282.479	129.478	136.121	97.105	196.99	5B	D8	TL	PA	TL PA	2
stdev	27.0362	18.432	14.2197	8.18337	20.1397	5B	D10	TL	PA	TL PA	2
stdev	40.7533	24.0843	24.0313	10.0381	32.5032	5B	D12	TL	PA	TL PA	2
stdev	149.487	73.6729	75.2799	39.0843	120.144	5B	D14	TL	PA	TL PA	2
stdev	151.248	66.1676	67.9375	63.5951	94.5716	5B	D16	TL	PA	TL PA	2
stdev	273.722	137.076	149.173	71.1502	217.835	5B	D19	TL	PA	TL PA	2
Measure	Body length	Body width	Gonad length	Gonad width	Trunk length	Mesocosm	Day	temp	pH	Treatment.code	Replicate
mean	154.463	76.7548	16.5022	11.0091	143.454	6A	D1	TL	PL	TL PL	1
mean	195.386	103.685	48.6036	25.2525	173.104	6A	D2	TL	PL	TL PL	1
mean	425.483	221.235	176.406	68.2159	357.267	6A	D4	TL	PL	TL PL	1
mean	621.004	321.807	290.875	129.282	491.723	6A	D6	TL	PL	TL PL	1
mean	114.473	60.9294	19.7989	9.58337	108.723	6A	D8	TL	PL	TL PL	1
mean	156.65	84.1102	34.6216	17.3176	139.332	6A	D10	TL	PL	TL PL	1
mean	272.44	150.663	114.225	42.4023	230.037	6A	D12	TL	PL	TL PL	1
mean	529.134	269.818	257.881	147.898	381.237	6A	D14	TL	PL	TL PL	1
mean	591.055	282.471	274.877	137.493	453.562	6A	D16	TL	PL	TL PL	1
mean	149.605	71.2379	23.4751	19.54	134.95	6A	D19	TL	PL	TL PL	1
stdev	2.47813	5.31787	5.78017	2.57606	5.05419	6A	D1	TL	PL	TL PL	1
stdev	22.2989	13.1319	12.9101	6.34372	21.9659	6A	D2	TL	PL	TL PL	1
stdev	100.981	52.0389	47.2282	26.864	82.2952	6A	D4	TL	PL	TL PL	1
stdev	119.586	64.9567	78.4099	61.8386	84.9796	6A	D6	TL	PL	TL PL	1
stdev	12.7457	8.67514	5.62909	1.20277	10.2047	6A	D8	TL	PL	TL PL	1
stdev	24.0463	12.1882	5.10939	7.455	17.923	6A	D10	TL	PL	TL PL	1
stdev	32.9779	21.9953	25.1015	14.699	30.8927	6A	D12	TL	PL	TL PL	1
stdev	142.691	62.8747	101.552	84.9992	82.7163	6A	D14	TL	PL	TL PL	1
stdev	199.892	90.1069	118.062	85.6674	125.776	6A	D16	TL	PL	TL PL	1
stdev	8.92456	8.32276	4.27921	0.746609	4.15184	6A	D19	TL	PL	TL PL	1
mean	145.49	75.4402	22.6038	11.5821	133.908	6B	D1	TL	PL	TL PL	2
mean	223.665	120.329	64.188	25.6462	203.718	6B	D2	TL	PL	TL PL	2
mean	556.028	299.801	238.745	100.544	455.483	6B	D4	TL	PL	TL PL	2
mean	539.563	265.427	235.952	98.1506	441.413	6B	D6	TL	PL	TL PL	2
mean	424.423	172.326	580.384	365.698	302.524	6B	D8	TL	PL	TL PL	2
mean	169.754	85.6876	46.2847	20.6639	149.091	6B	D10	TL	PL	TL PL	2
mean	207.3	108.773	53.7677	28.306	181.016	6B	D12	TL	PL	TL PL	2
mean	404.598	237.463	193.018	99.1609	305.437	6B	D14	TL	PL	TL PL	2
mean	611.604	284.689	327.56	190.882	432.652	6B	D16	TL	PL	TL PL	2
mean	172.85	87.9542	36.6415	22.0642	152.855	6B	D19	TL	PL	TL PL	2
stdev	20.0616	7.79297	6.08618	3.2736	21.706	6B	D1	TL	PL	TL PL	2
stdev	26.7838	14.0264	15.1907	6.13858	18.8681	6B	D2	TL	PL	TL PL	2
stdev	179.561	101.08	86.5221	51.7558	137.145	6B	D4	TL	PL	TL PL	2
stdev	207.729	97.3822	112.535	66.0532	141.676	6B	D6	TL	PL	TL PL	2
stdev	542.515	201.571	#DIV/0!	#DIV/0!	331.38	6B	D8	TL	PL	TL PL	2
stdev	26.669	8.94763	6.19254	2.81981	25.0824	6B	D10	TL	PL	TL PL	2
stdev	64.7942	37.8878	26.8998	14.5788	50.447	6B	D12	TL	PL	TL PL	2
stdev	145.76	86.1399	114.076	92.0359	83.872	6B	D14	TL	PL	TL PL	2
stdev	257.035	103.913	154.831	132.269	137.694	6B	D16	TL	PL	TL PL	2
stdev	27.5101	15.0179	12.8967	5.04372	23.4615	6B	D19	TL	PL	TL PL	2
Measure	Body length	Body width	Gonad length	Gonad width	Trunk length	Mesocosm	Day	temp	pH	Treatment.code	Replicate
mean	149.498	78.0552	22.4731	13.5712	138.015	7A	D1	TH	PL	TH PL	1
mean	228.716	122.862	61.6693	26.2904	204.816	7A	D2	TH	PL	TH PL	1
mean	475.263	258.047	216.139	83.1821	392.081	7A	D4	TH	PL	TH PL	1
mean	119.372	61.429	#DIV/0!	#DIV/0!	119.372	7A	D6	TH	PL	TH PL	1
mean	178.985	91.4762	50.0293	20.1834	158.802	7A	D8	TH	PL	TH PL	1
mean	394.537	209.918	166.584	76.8584	317.679	7A	D10	TH	PL	TH PL	1
mean	461.768	229.968	239.54	131.718	340.182	7A	D12	TH	PL	TH PL	1
mean	165.115	85.4123	59.3599	24.1252	147.624	7A	D14	TH	PL	TH PL	1
mean	149.29	75.972	38.2367	18.6758	135.529	7A	D16	TH	PL	TH PL	1
mean	194.492	97.8615	36.1724	20.9195	176.188	7A	D19	TH	PL	TH PL	1
stdev	18.3345	9.276	5.08395	2.83052	18.7052	7A	D1	TH	PL	TH PL	1
stdev	22.9478	12.3452	12.1481	4.2834	22.258	7A	D2	TH	PL	TH PL	1
stdev	67.5263	31.3412	37.3004	27.8275	57.5282	7A	D4	TH	PL	TH PL	1
stdev	14.545	6.26407	#DIV/0!	#DIV/0!	14.545	7A	D6	TH	PL	TH PL	1
stdev	31.7134	22.2679	12.543	7.93419	27.6203	7A	D8	TH	PL	TH PL	1
stdev	164.231	79.9547	93.0591	66.7341	106.509	7A	D10	TH	PL	TH PL	1
stdev	215.865	103.711	128.937	99.2796	130.465	7A	D12	TH	PL	TH PL	1
stdev	113.933	56.6899	66.7506	27.793	91.1301	7A	D14	TH	PL	TH PL	1
stdev	71.0268	36.8416	40.915	9.29978	61.6339	7A	D16	TH	PL	TH PL	1
stdev	24.5154	9.22531	6.95617	4.4198	21.2132	7A	D19	TH	PL	TH PL	1
mean	157.313	80.5823	29.9163	13.6609	146.384	7B	D1	TH	PL	TH PL	2
mean	228.699	122.748	66.3681	26.4135	202.285	7B	D2	TH	PL	TH PL	2
mean	456.842	248.716	199.348	77.3324	379.509	7B	D4	TH	PL	TH PL	2
mean	208.197	108.285	269.783	66.493	194.899	7B	D6	TH	PL	TH PL	2
mean	198.343	104.882	58.4137	28.7256	173.208	7B	D8	TH	PL	TH PL	2
mean	458.746	238.29	194.416	93.428	365.318	7B	D10	TH	PL	TH PL	2
mean	554.569	285.659	250.983	138.859	423.425	7B	D12	TH	PL	TH PL	2
mean	335.608	168.34	134.292	61.0665	279.776	7B	D14	TH	PL	TH PL	2
mean	164.318	79.8979	43.9341	21.0909	147.446	7B	D16	TH	PL	TH PL	2
mean	279.323	144.169	87.3848	38.4088	247.414	7B	D19	TH	PL	TH PL	2
stdev	18.9354	4.74787	4.9513	3.57786	13.517	7B	D1	TH	PL	TH PL	2
stdev	27.1274	19.7682	21.8496	5.53533	23.6872	7B	D2	TH	PL	TH PL	2
stdev	84.0241	36.2301	49.0135	27.0019	67.558	7B	D4	TH	PL	TH PL	2
stdev	215.823	105.789	#DIV/0!	#DIV/0!	186.123	7B	D6	TH	PL	TH PL	2
stdev	22.2423	14.4498	12.7991	4.72003	18.4284	7B	D8	TH	PL	TH PL	2
stdev	182.916	87.7405	101.248	70.5885	118.654	7B	D10	TH	PL	TH PL	2
stdev	266.637	135.439	146.957	97.8732	181.254	7B	D12	TH	PL	TH PL	2
stdev	268.093	125.702	132.614	67.4268	208.092	7B	D14	TH	PL	TH PL	2
stdev	71.5029	33.0545	45.4978	19.8038	53.4773	7B	D16	TH	PL	TH PL	2
stdev	121.534	58.1405	69.4124	27.8354	99.2062	7B	D19	TH	PL	TH PL	2
