# Supplementary material for: Increased fitness of a key appendicularian zooplankton species under warmer, acidified seawater conditions
Source: PLoS One. 2018 Jan 3;13(1):e0190625. doi: 10.1371/journal.pone.0190625 (PMC5752025; doi:10.1371/journal.pone.0190625)
Supplement: S2 Data — (XLSX) [file pone.0190625.s009.xlsx]

## Sheet: Seawater parameters, 3 diets 
Codes correspond to targeted conditions as pH-temperature-replicate#						calc = calculated from CO2CALC software using temperature, salinity, ph (NBS) and total alkalinity as input values
Experiments with living algae cells: 6 replicates per diet
Standard diet
		Water temperature when pH was measured, measured with benchtop CT instrument (CO2calc input)	pH(NBS)	Salinity measured with benchtop CT instrument (CO2calc input)	Total alkalinity (measured), micromol per kilogram seawater (CO2calc input)	pH (calculated), total scale	Fugosity of CO2 (calculated), in saturated air at equilibrium with water in microatmospheres (CO2calc output)	Partial pressure of CO2 in seawater (calculated). Product of mole fraction of CO2 in wet air and the total pressure in microatmospheres (CO2calc output)	Concentration of bicarbonate ion micromol per kilogram seawater (CO2calc output)	Concentration of carbonate ion, micromol per kilogram seawater (CO2calc output)	Concentraiton of CO2,; micromol per kilogram seawater (CO2calc output)	Alkalinity of boron, micromol per kilogram seawater (CO2calc output)	Concentration of hydroxide ions, micromol per kilogram seawater (CO2calc output)	Alkalinity of phosphorus, micromol per kilogram seawater (CO2calc output)	Alkalinity of silicate, micromol per kilogram seawater (CO2calc output)	Homogeneous buffer factor. Percent change in fCO2 or pCO2 caused by a 1% change in total carbon at constant alkalinity; no units (CO2calc output)	Omega calcite, calcite saturation state. no units (CO2calc output)	Omega aragonite, aragonite saturation state. no units (CO2calc output)	Mole fraction of CO2 in dry air at 1 atm, parts per million (O2calc output)
Conditions	Day	Temperature ( C )	pH, measured	Salinity (ppt)	TA umol/kgSW	pH calc	fCO2 calc (matm)	pCO2 calc (uatm)	HCO3 calc (umol/kgSW)	CO3 calc (umol/kgSW)	CO2 calc (umol/kgSW)	B Alk calc (umol/kgSW)	OH calc (umol/kgSW)	P Alk calc (umol/kgSW)	Si Alk calc (umol/kgSW)	Revelle calc	WCa calc	WAr calc	xCO2 calc (dry at 1 atm) (ppm)
7.6-15C-R1	0	16.4	8.021	31.8	2050	8.13053	402.245	403.677	1728.64	128.542	14.7085	61.6609	2.61901	0	0	12.0482	3.13238	2.00476	411.108
7.6-15C-R1	0.4	14.4	7.615	31.8	2114	7.73268	1123.56	1127.67	1977.03	54.9696	43.6406	26.1789	0.8716	0	0	17.9399	1.33715	0.85207	1145.88
7.6-15C-R1	0.8	14.1	7.584	31.8	2004	7.70308	1141.02	1145.2	1882.06	48.3835	44.7299	24.4032	0.791754	0	0	17.9716	1.17668	0.749344	1163.34
7.6-15C-R1	1	14.2	7.62	31.8	2054	7.74038	1068.79	1072.7	1918.78	53.9356	41.7692	26.4972	0.870843	0	0	17.8188	1.3118	0.835567	1089.8
7.6-15C-R1	1.5	14	7.611	31.8	2074	7.73313	1096.61	1100.63	1940.64	53.2811	43.1218	25.9733	0.840596	0	0	17.9382	1.29569	0.824966	1117.95
7.6-15C-R1	2	14.3	7.692	31.8	2132	7.81579	922.422	925.795	1967.74	66.0257	35.9383	31.1759	1.04567	0	0	17.2296	1.60597	1.02315	940.652
7.6-15C-R1	2.5	13.9	7.62	31.8	2086	7.74394	1073.16	1077.1	1949.28	54.6795	42.3306	26.5229	0.853769	0	0	17.9017	1.3296	0.846382	1093.94
7.6-15C-R1	3	14	7.692	31.8	2112	7.81946	902.883	906.198	1949.21	65.2855	35.504	31.2132	1.02546	0	0	17.2179	1.58762	1.01083	920.455
7.6-15C-R1	3.5	14.4	7.625	31.8	1982	7.74335	1025.27	1029.01	1848.96	52.6883	39.8227	26.7842	0.89329	0	0	17.6309	1.28166	0.816706	1045.63
7.6-15C-R1	4	14.2	7.605	31.8	1952	7.72438	1055.63	1059.5	1826.6	49.4871	41.2551	25.6036	0.839339	0	0	17.743	1.20361	0.766651	1076.39
7.6-15C-R1	4.5	14.5	7.649	31.8	1950	7.7677	950.707	954.174	1811.24	54.7753	36.8135	28.275	0.953613	0	0	17.3458	1.33253	0.849302	969.689
7.6-15C-R1	5	14.3	7.671	31.8	1962	7.79346	895.982	899.258	1815.55	57.8663	34.9081	29.7365	0.993267	0	0	17.1564	1.40751	0.896714	913.689
7.6-15C-R1	5.5	14.4	7.648	31.8	1920	7.76783	934.685	938.098	1783.32	53.7638	36.3043	28.2209	0.945076	0	0	17.3047	1.30782	0.833378	953.252
7.6-15C-R1	6	14.2	7.656	31.8	1968	7.77874	931.216	934.625	1826.16	56.072	36.3928	28.7575	0.951251	0	0	17.336	1.36376	0.868663	949.525
7.6-15C-R1	6.5	14.3	7.664	31.8	1968	7.78603	915.433	918.78	1823.5	57.1337	35.666	29.2712	0.976417	0	0	17.2442	1.38969	0.885361	933.524
7.6-15C-R2	0	16.4	8.021	31.8	2050	8.13053	402.245	403.677	1728.64	128.542	14.7085	61.6609	2.61901	0	0	12.0482	3.13238	2.00476	411.108
7.6-15C-R2	0.4	14.5	7.592	31.8	1992	7.70698	1127.68	1131.8	1868.11	49.1246	43.6665	24.8286	0.829199	0	0	17.8693	1.19506	0.761686	1150.2
7.6-15C-R2	0.8	14.2	7.69	31.8	2070	7.81487	896.411	899.693	1910.44	63.7491	35.0326	31.0476	1.03379	0	0	17.1505	1.55048	0.987597	914.036
7.6-15C-R2	1	14.5	7.554	31.8	2028	7.66635	1267.96	1272.58	1912.9	45.8101	49.0982	22.7448	0.755146	0	0	18.0869	1.11443	0.710294	1293.27
7.6-15C-R2	1.5	14.2	7.64	31.8	2070	7.76171	1022.21	1025.95	1927.55	56.9099	39.9489	27.7332	0.914684	0	0	17.6793	1.38414	0.881644	1042.31
7.6-15C-R2	2	14.5	7.643	31.8	2072	7.76132	1027.08	1030.83	1928.25	57.465	39.771	27.8937	0.939727	0	0	17.6291	1.39796	0.891005	1047.59
7.6-15C-R2	2.5	14.1	7.661	31.8	2062	7.78528	959.846	963.365	1913.11	59.4294	37.6276	29.0962	0.956728	0	0	17.4691	1.44531	0.920418	978.622
7.6-15C-R2	3	14.1	7.655	31.8	2110	7.7789	998.104	1001.76	1960.35	60.0092	39.1273	28.7042	0.942778	0	0	17.6155	1.45941	0.929397	1017.63
7.6-15C-R2	3.5	14.4	7.646	31.8	2028	7.76571	993.24	996.868	1885.83	56.5776	38.5787	28.0938	0.94048	0	0	17.5307	1.37627	0.876993	1012.97
7.6-15C-R2	4	14.2	7.616	31.8	2092	7.73611	1100.3	1104.33	1956.01	54.4437	43.0009	26.2557	0.862312	0	0	17.9144	1.32416	0.843438	1121.94
7.6-15C-R2	4.5	14.6	7.674	31.8	2050	7.79304	940.394	943.82	1897.04	61.0252	36.3028	29.9051	1.02035	0	0	17.2662	1.48469	0.94648	959.267
7.6-15C-R2	5	14.3	7.69	31.8	1936	7.8136	840.888	843.963	1784.77	59.5847	32.7617	31.0317	1.0404	0	0	16.8845	1.44931	0.923343	857.506
7.6-15C-R2	5.5	14.4	7.634	31.8	1994	7.75294	1007.54	1011.22	1857.54	54.1138	39.1341	27.3386	0.913224	0	0	17.5772	1.31633	0.838803	1027.55
7.6-15C-R2	6	14.1	7.642	31.8	1944	7.76504	950.408	953.892	1808.02	53.6071	37.2576	27.8689	0.913155	0	0	17.435	1.30372	0.830244	969
7.6-15C-R2	6.5	14.3	7.649	31.8	2026	7.7701	980.653	984.239	1883.03	56.8731	38.207	28.2955	0.941236	0	0	17.5069	1.38335	0.881324	1000.03
7.6-15C-R3	0	16	7.981	29.2	2032	8.09566	450.746	452.359	1758.26	110.511	16.9222	50.5184	2.20548	0	0	13.347	2.73615	1.73614	460.484
7.6-15C-R3	0.4	14.2	7.599	29.2	2051.1	7.71772	1158.74	1162.98	1932.45	47.8362	45.9513	22.2127	0.782639	0	0	18.5845	1.18176	0.746973	1181.55
7.6-15C-R3	0.8	14	7.642	29.2	2058.6	7.76613	1031.38	1035.17	1927.29	52.9674	41.1548	24.5363	0.858797	0	0	18.3614	1.30824	0.826576	1051.48
7.6-15C-R3	1	14.2	7.587	29.2	2049.3	7.70486	1194.53	1198.9	1934	46.4776	47.3705	21.6048	0.7598	0	0	18.6254	1.1482	0.725758	1218.04
7.6-15C-R3	1.5	14.2	7.637	29.2	2056.8	7.75839	1052.16	1056.01	1926.96	52.3829	41.7247	24.2408	0.859468	0	0	18.3764	1.29409	0.817971	1072.87
7.6-15C-R3	2	14.5	7.624	29.2	2053.3	7.74093	1099.25	1103.26	1927.26	50.8496	43.191	23.5067	0.848916	0	0	18.4284	1.25664	0.794793	1121.23
7.6-15C-R3	2.5	14.1	7.625	29.2	2055.5	7.74674	1080.84	1084.8	1929.33	50.8842	42.9949	23.5906	0.828988	0	0	18.4653	1.25692	0.794317	1102.01
7.6-15C-R3	3	14.4	7.646	29.2	2057.1	7.76561	1035.8	1039.58	1924.38	53.5574	40.8234	24.7279	0.890252	0	0	18.2896	1.3234	0.836846	1056.4
7.6-15C-R3	3.5	14.5	7.6	29.2	2048.7	7.71528	1167.6	1171.86	1929.69	47.9936	45.8763	22.2451	0.800229	0	0	18.5459	1.18605	0.750153	1190.94
7.6-15C-R3	4	14.4	7.552	29.2	2042.5	7.66503	1313.89	1318.69	1936.4	42.7509	51.7835	19.9094	0.706211	0	0	18.649	1.05637	0.667992	1340.02
7.6-15C-R3	4.5	13.7	7.591	29.2	2052.5	7.71499	1161.68	1165.96	1936.31	46.8165	46.7883	21.8358	0.742346	0	0	18.6685	1.15595	0.729909	1183.97
7.6-15C-R3	5	14.5	7.573	29.2	2045.6	7.68639	1250.69	1255.26	1933.97	45.0037	49.1413	20.8994	0.748717	0	0	18.6235	1.11217	0.703421	1275.7
7.6-15C-R3	5.5	14.3	7.634	29.2	2055.8	7.75399	1064.02	1067.91	1926.83	52.0305	42.0649	24.067	0.858747	0	0	18.3863	1.28553	0.812728	1085.07
7.6-15C-R3	6	14.5	7.646	29.2	2056.6	7.76441	1039.55	1043.35	1923.84	53.579	40.8454	24.7194	0.896072	0	0	18.2792	1.32409	0.837455	1060.34
7.6-15C-R3	6.5	14.1	7.608	29.2	2053	7.72854	1128.57	1132.71	1931.82	48.8581	44.8936	22.6854	0.794953	0	0	18.5568	1.20688	0.762689	1150.68
7.6-15C-R4	0	16	7.981	29.2	2032	8.09566	450.746	452.359	1758.26	110.511	16.9222	50.5184	2.20548	0	0	13.347	2.73615	1.73614	460.484
7.6-15C-R4	0.4	14.1	7.571	29.2	2050.1	7.68885	1241.19	1245.74	1939.06	44.7583	49.3736	20.8232	0.725529	0	0	18.6758	1.1056	0.698691	1265.5
7.6-15C-R4	0.8	14.3	7.603	29.2	2054.3	7.72083	1152.9	1157.12	1934.32	48.3934	45.5789	22.4122	0.795623	0	0	18.5623	1.19566	0.755915	1175.71
7.6-15C-R4	1	14.3	7.578	29.2	2051	7.69405	1228.54	1233.03	1937.95	45.5844	48.5691	21.1535	0.748039	0	0	18.6423	1.12626	0.712038	1252.85
7.6-15C-R4	1.5	14.6	7.578	29.2	2052.1	7.69058	1243.18	1247.71	1938.8	45.7112	48.6963	21.1373	0.763023	0	0	18.6128	1.12978	0.71471	1268.16
7.6-15C-R4	2	14.2	7.564	29.2	2049.2	7.68018	1268.23	1272.87	1939.93	44.0455	50.2932	20.4822	0.71784	0	0	18.6738	1.08812	0.68778	1293.19
7.6-15C-R4	2.5	14.5	7.631	29.2	2057.9	7.74841	1081.79	1085.74	1929.58	51.7944	42.5051	23.8866	0.863651	0	0	18.391	1.27998	0.80956	1103.42
7.6-15C-R4	3	14.8	7.61	29.2	2055.2	7.72246	1154.31	1158.51	1932.88	49.3798	44.9391	22.7429	0.836457	0	0	18.4799	1.22074	0.772577	1177.75
7.6-15C-R4	3.5	14.5	7.599	29.2	2073.8	7.7142	1185.17	1189.5	1953.88	48.4748	46.5669	22.1934	0.798245	0	0	18.5905	1.19795	0.757674	1208.87
7.6-15C-R4	4	13.9	7.616	29.2	2076	7.73947	1109.21	1113.29	1951.56	50.2675	44.3979	23.1213	0.80018	0	0	18.5727	1.24142	0.784199	1130.71
7.6-15C-R4	4.5	14.5	7.653	29.2	2080.8	7.77187	1032.87	1036.64	1944.6	55.0954	40.5828	25.1167	0.911599	0	0	18.264	1.36156	0.861156	1053.52
7.6-15C-R4	5	14.4	7.596	29.2	2093.4	7.71215	1201.34	1205.73	1973.46	48.5627	47.3477	22.0462	0.787154	0	0	18.6435	1.19998	0.758803	1225.23
7.6-15C-R4	5.5	14.6	7.593	29.2	2093	7.70661	1219.74	1224.19	1973.78	48.2856	47.7782	21.882	0.791714	0	0	18.6331	1.19341	0.754963	1244.25
7.6-15C-R4	6	14.3	7.595	29.2	2093.3	7.71225	1199.86	1204.25	1973.71	48.4126	47.4352	22.0015	0.780054	0	0	18.6574	1.19614	0.756215	1223.6
7.6-15C-R4	6.5	14.4	7.579	29.2	2091.1	7.69394	1254.34	1258.92	1975.92	46.6266	49.4364	21.1963	0.754833	0	0	18.6915	1.15214	0.728552	1279.29
7.6-15C-R5	0	15.8	8.043	31.4	2131.8	8.16122	386.398	387.785	1788.99	138.352	14.4162	63.4685	2.63886	0	0	11.972	3.37807	2.15683	394.651
7.6-15C-R5	0.4	14.4	7.64	31.4	2133.8	7.75932	1066.62	1070.52	1989.4	58.1519	41.522	27.1929	0.919181	0	0	17.8776	1.41805	0.902677	1087.81
7.6-15C-R5	0.8	14.5	7.648	31.4	2135	7.76665	1049.16	1052.99	1987.8	59.2953	40.7171	27.6818	0.943537	0	0	17.799	1.44605	0.920695	1070.11
7.6-15C-R5	1	14.4	7.614	31.4	2130.2	7.73159	1139.78	1143.94	1994.35	54.6905	44.3698	25.6264	0.862324	0	0	18.0736	1.33365	0.848947	1162.42
7.6-15C-R5	1.5	14.4	7.631	31.4	2132.6	7.74973	1091.43	1095.42	1991.21	56.9334	42.4879	26.6413	0.899102	0	0	17.951	1.38834	0.883762	1113.12
7.6-15C-R5	2	14.2	7.626	31.4	2131.9	7.74677	1096.94	1100.96	1992.3	56.1923	42.966	26.3565	0.876536	0	0	18.0078	1.37004	0.871753	1118.51
7.6-15C-R5	2.5	14.4	7.641	31.4	2134	7.76039	1063.93	1067.82	1989.26	58.2906	41.4173	27.2548	0.921439	0	0	17.8692	1.42143	0.90483	1085.07
7.6-15C-R5	3	14.3	7.614	31.4	2130.2	7.73277	1135.41	1139.56	1994.42	54.6541	44.3358	25.6345	0.856665	0	0	18.0831	1.33265	0.848135	1157.85
7.6-15C-R5	3.5	14.2	7.735	31.4	2147.2	7.86257	829.735	832.773	1967.49	72.4495	32.4998	33.683	1.14438	0	0	16.8256	1.76642	1.12396	846.052
7.6-15C-R5	4	14.4	7.645	31.4	2114.5	7.76465	1043.09	1046.9	1969.52	58.2811	40.6061	27.5036	0.930522	0	0	17.8007	1.4212	0.904682	1063.82
7.6-15C-R5	4.5	14.5	7.709	31.4	2123.5	7.83137	889.114	892.357	1955.27	67.6977	34.5058	31.7515	1.09516	0	0	17.1063	1.65097	1.05116	906.87
7.6-15C-R5	5	14.3	7.635	31.4	2093.1	7.75519	1055.7	1059.56	1952.63	56.3434	41.2234	26.8944	0.902043	0	0	17.8605	1.37384	0.87435	1076.57
7.6-15C-R5	5.5	14.4	7.642	31.4	2104.1	7.76145	1046.08	1049.9	1960.69	57.5945	40.7225	27.3168	0.923702	0	0	17.8098	1.40446	0.894024	1066.87
7.6-15C-R5	6	14.4	7.665	31.4	2137.3	7.78593	1000.63	1004.28	1984.23	61.6653	38.953	28.7783	0.977255	0	0	17.6458	1.50373	0.957214	1020.51
7.6-15C-R5	6.5	14.4	7.665	31.4	2137.3	7.78593	1000.63	1004.28	1984.23	61.6653	38.953	28.7783	0.977255	0	0	17.6458	1.50373	0.957214	1020.51
7.6-15C-R6	0	15.8	8.043	31.4	2131.8	8.16122	386.398	387.785	1788.99	138.352	14.4162	63.4685	2.63886	0	0	11.972	3.37807	2.15683	394.651
7.6-15C-R6	0.4	14.8	7.623	31.4	2131.4	7.73647	1131.15	1135.26	1992.36	56.0125	43.4981	26.1255	0.905037	0	0	17.9736	1.36634	0.870496	1154.09
7.6-15C-R6	0.8	14.5	7.634	31.4	2133	7.75174	1087.29	1091.26	1990.54	57.3737	42.1971	26.815	0.911701	0	0	17.9179	1.39919	0.890858	1109.01
7.6-15C-R6	1	14.5	7.555	31.4	2121.9	7.66735	1329.24	1334.08	2003.7	47.5533	51.5866	22.3632	0.750686	0	0	18.3134	1.1597	0.738373	1355.78
7.6-15C-R6	1.5	14.4	7.614	31.4	2130.2	7.73159	1139.78	1143.94	1994.35	54.6905	44.3698	25.6264	0.862324	0	0	18.0736	1.33365	0.848947	1162.42
7.6-15C-R6	2	14.4	7.618	31.4	2130.7	7.73586	1128.18	1132.3	1993.57	55.2093	43.9185	25.862	0.870845	0	0	18.0465	1.3463	0.856999	1150.6
7.6-15C-R6	2.5	14.3	7.631	31.4	2132.6	7.75092	1087.22	1091.2	1991.28	56.8967	42.4544	26.6502	0.893223	0	0	17.9602	1.38733	0.882937	1108.71
7.6-15C-R6	3	14.5	7.667	31.4	2137.6	7.78685	999.434	1003.08	1983.75	61.9919	38.7873	28.8978	0.988462	0	0	17.617	1.51182	0.962566	1019.39
7.6-15C-R6	3.5	14.3	7.654	31.4	2115.8	7.77543	1015.45	1019.17	1967.81	59.4907	39.6519	28.081	0.945083	0	0	17.7275	1.45058	0.923191	1035.53
7.6-15C-R6	4	14.4	7.645	31.4	2118.5	7.76465	1045.09	1048.91	1973.3	58.3929	40.6839	27.5036	0.930523	0	0	17.8075	1.42393	0.906418	1065.86
7.6-15C-R6	4.5	14.4	7.643	31.4	2120.2	7.76252	1051.44	1055.28	1975.56	58.174	40.9309	27.379	0.925971	0	0	17.8283	1.41859	0.90302	1072.33
7.6-15C-R6	5	14.4	7.651	31.4	2119.3	7.77104	1029.18	1032.94	1972.05	59.2207	40.0646	27.8807	0.94431	0	0	17.7533	1.44411	0.919267	1049.63
7.6-15C-R6	5.5	14.4	7.641	31.4	2134	7.76039	1063.93	1067.82	1989.26	58.2906	41.4173	27.2548	0.921439	0	0	17.8692	1.42143	0.90483	1085.07
7.6-15C-R6	6	14.6	7.639	31.4	2133.7	7.75587	1077.67	1081.6	1989.49	58.0897	41.6958	27.1125	0.929003	0	0	17.8678	1.41677	0.902242	1099.31
7.6-15C-R6	6.5	14.6	7.639	31.4	2141	7.75587	1081.41	1085.35	1996.39	58.2913	41.8403	27.1125	0.929004	0	0	17.88	1.42169	0.905372	1103.12
8.0-15C-R1	0	16.4	8.021	31.8	2050	8.13053	402.245	403.677	1728.64	128.542	14.7085	61.6609	2.61901	0	0	12.0482	3.13238	2.00476	411.108
8.0-15C-R1	0.4	14.3	8.024	31.8	1996	8.16135	355.598	356.898	1680.94	124.983	13.8544	62.7822	2.31712	0	0	11.9659	3.04003	1.93678	362.625
8.0-15C-R1	0.8	14	8.034	31.8	2006	8.17565	343.393	344.653	1683.46	128.04	13.5032	64.1434	2.32864	0	0	11.8455	3.11368	1.98247	350.076
8.0-15C-R1	1	14.2	8.043	31.8	1968	8.1821	331.312	332.525	1644.72	127.84	12.948	65.1957	2.40803	0	0	11.653	3.10927	1.98048	337.826
8.0-15C-R1	1.5	13.9	8.044	31.8	2006	8.18724	332.687	333.91	1677.07	130.559	13.1228	65.4489	2.36944	0	0	11.7063	3.17471	2.02091	339.129
8.0-15C-R1	2	14.1	8.057	31.8	2122	8.19812	342.893	344.15	1768.22	142.115	13.442	67.0777	2.47531	0	0	11.6964	3.45622	2.20102	349.6
8.0-15C-R1	2.5	13.9	8.072	31.8	2110	8.21616	324.334	325.526	1747.53	145.409	12.7933	69.13	2.53256	0	0	11.476	3.53582	2.25079	330.614
8.0-15C-R1	3	14	8.078	31.8	2180	8.22109	331.236	332.452	1802.99	152.259	13.0252	69.9095	2.58552	0	0	11.49	3.70265	2.35746	337.683
8.0-15C-R1	3.5	14.2	7.978	31.8	2062	8.11555	414.883	416.402	1766.95	117.826	16.214	57.3386	2.06588	0	0	12.7581	2.86572	1.82535	423.04
8.0-15C-R1	4	14.1	8.003	31.8	2028	8.14253	379.529	380.92	1721.99	121.77	14.8781	60.3048	2.17789	0	0	12.3291	2.96142	1.88592	386.953
8.0-15C-R1	4.5	14.3	8.064	31.8	2086	8.20252	333.325	334.544	1732.33	141.612	12.9866	67.9026	2.54753	0	0	11.5433	3.44449	2.19446	339.913
8.0-15C-R1	5	14.2	8.07	31.8	2078	8.20999	325.187	326.377	1721.37	142.669	12.7086	68.7323	2.56771	0	0	11.4514	3.46995	2.21022	331.581
8.0-15C-R1	5.5	14.3	8.01	31.8	2052	8.1471	380.044	381.434	1738.5	125.09	14.8068	61.0831	2.24231	0	0	12.2598	3.04262	1.93843	387.555
8.0-15C-R1	6	14.1	8.022	31.8	2074	8.16214	368.707	370.058	1750.15	129.477	14.4539	62.6282	2.27848	0	0	12.1234	3.14886	2.00529	375.919
8.0-15C-R1	6.5	14.1	8.042	31.8	2074	8.18265	349.06	350.34	1737.04	134.723	13.6837	65.1351	2.38869	0	0	11.8363	3.27645	2.08654	355.889
8.0-15C-R2	0	16.4	8.021	31.8	2050	8.13053	402.245	403.677	1728.64	128.542	14.7085	61.6609	2.61901	0	0	12.0482	3.13238	2.00476	411.108
8.0-15C-R2	0.4	14.7	8.029	31.8	2078	8.16129	371.714	373.066	1748.74	131.793	14.3058	63.2737	2.40453	0	0	12.0152	3.20666	2.04466	379.213
8.0-15C-R2	0.8	14.2	8.038	31.8	1972	8.17699	336.589	337.822	1651.36	126.853	13.1542	64.5628	2.37983	0	0	11.7296	3.08526	1.96519	343.207
8.0-15C-R2	1	14.4	8.042	31.8	2048	8.17857	348.983	350.257	1714.4	133.08	13.5549	65.0131	2.43338	0	0	11.7903	3.23722	2.06284	355.915
8.0-15C-R2	1.5	14.1	8.051	31.8	2070	8.19187	339.867	341.113	1727.56	136.862	13.3233	66.2868	2.43992	0	0	11.7035	3.32845	2.11965	346.515
8.0-15C-R2	2	14.5	8.061	31.8	2062	8.19671	334.957	336.178	1713.68	139.172	12.9703	67.4232	2.56085	0	0	11.5452	3.38566	2.15788	341.645
8.0-15C-R2	2.5	14	8.077	31.8	2162.2	8.22003	329.38	330.589	1788.52	150.669	12.9522	69.7706	2.57922	0	0	11.4794	3.66397	2.33284	335.791
8.0-15C-R2	3	14	8.088	31.8	2110	8.23118	311.612	312.755	1736.02	150.048	12.2535	71.2422	2.64627	0	0	11.2589	3.64887	2.32323	317.676
8.0-15C-R2	3.5	14.4	7.979	31.8	2028	8.11386	410.228	411.726	1736.29	116.122	15.9337	57.3804	2.09652	0	0	12.6813	2.82469	1.79997	418.377
8.0-15C-R2	4	14.2	8.008	31.8	1992	8.14625	369.157	370.509	1687.4	120.765	14.427	60.8625	2.21723	0	0	12.1936	2.9372	1.87088	376.416
8.0-15C-R2	4.5	14.6	8.064	31.8	1950	8.1982	315.045	316.193	1615.47	132.097	12.1619	67.7453	2.59363	0	0	11.3279	3.2138	2.04878	321.368
8.0-15C-R2	5	14.2	8.079	31.8	2046	8.21913	312.195	313.338	1687.74	142.858	12.2009	69.9234	2.62232	0	0	11.2828	3.47453	2.21314	318.334
8.0-15C-R2	5.5	14.3	8.015	31.8	2034	8.15219	371.54	372.898	1719.66	125.195	14.4755	61.6864	2.26879	0	0	12.1578	3.04518	1.94006	378.882
8.0-15C-R2	6	14.1	8.023	31.8	2046	8.1631	362.632	363.962	1725.15	127.913	14.2158	62.7447	2.28356	0	0	12.0651	3.11082	1.98106	369.726
8.0-15C-R2	6.5	14.1	8.049	31.8	2057	8.18979	339.546	340.79	1717.69	135.431	13.3108	66.0259	2.42828	0	0	11.7118	3.29365	2.09749	346.188
8.0-15C-R3	0	16	7.981	29.2	2113.5	8.09577	469.172	470.851	1830.6	115.086	17.614	50.5292	2.20603	0	0	13.4788	2.84943	1.80802	479.308
8.0-15C-R3	0.4	14.2	7.996	29.2	2115.7	8.13521	418.406	419.938	1824.77	118.125	16.5924	52.6426	2.04667	0	0	13.2988	2.91822	1.84456	426.643
8.0-15C-R3	0.8	14	8.006	29.2	2107.2	8.14819	402.181	403.657	1811.39	119.988	16.048	53.7736	2.06992	0	0	13.1326	2.96357	1.87245	410.017
8.0-15C-R3	1	14.2	8.013	29.2	2118	8.15272	400.058	401.523	1816.54	122.432	15.8648	54.4687	2.1309	0	0	13.0336	3.02461	1.91181	407.933
8.0-15C-R3	1.5	14.2	8.013	29.2	2118.2	8.15272	400.096	401.561	1816.72	122.444	15.8663	54.4687	2.1309	0	0	13.034	3.02491	1.91199	407.972
8.0-15C-R3	2	14.4	8.031	29.2	2120.9	8.16853	384.775	386.181	1807.8	127.235	15.1649	56.387	2.25134	0	0	12.7535	3.14396	1.98807	392.428
8.0-15C-R3	2.5	14.1	8.04	29.2	2122.2	8.18185	370.971	372.331	1803.39	129.53	14.7569	57.5045	2.25763	0	0	12.6253	3.19959	2.02199	378.236
8.0-15C-R3	3	14.4	8.047	29.2	2123.3	8.18497	368.822	370.169	1799.68	131.548	14.5361	58.1968	2.33817	0	0	12.5137	3.25054	2.05547	376.157
8.0-15C-R3	3.5	14.3	7.987	29.2	2114.4	8.12458	430.224	431.797	1828.87	115.929	17.0085	51.6647	2.01585	0	0	13.4376	2.86427	1.81083	438.736
8.0-15C-R3	4	14.4	8.003	29.2	2106.7	8.13971	412.253	413.759	1812.53	119.376	16.2479	53.3229	2.10677	0	0	13.168	2.94977	1.86527	420.452
8.0-15C-R3	4.5	13.8	8.057	29.2	2144.8	8.20343	353.478	354.779	1812.16	135.384	14.1926	59.573	2.3073	0	0	12.4087	3.34312	2.1114	360.295
8.0-15C-R3	5	14.4	8.036	29.2	2121.6	8.17367	379.713	381.1	1805.25	128.567	14.9654	56.9478	2.27813	0	0	12.678	3.17688	2.00889	387.265
8.0-15C-R3	5.5	14.4	8.031	29.2	2120.9	8.16853	384.775	386.181	1807.8	127.235	15.1649	56.387	2.25134	0	0	12.7535	3.14396	1.98807	392.428
8.0-15C-R3	6	14.3	8.018	29.2	2109	8.1565	394.634	396.077	1805.51	123.175	15.6015	54.98	2.16958	0	0	12.9391	3.04331	1.92403	402.442
8.0-15C-R3	6.5	14	8.016	29.2	2108.6	8.15849	391.703	393.141	1806.55	122.54	15.63	54.8603	2.11961	0	0	12.9776	3.0266	1.91228	399.335
8.0-15C-R4	0	16	7.981	29.2	2032	8.09566	450.746	452.359	1758.26	110.511	16.9222	50.5184	2.20548	0	0	13.347	2.73615	1.73614	460.484
8.0-15C-R4	0.4	14.3	7.99	29.2	2114.8	8.12768	426.841	428.402	1827.46	116.668	16.8747	51.9787	2.03026	0	0	13.3902	2.88252	1.82237	435.287
8.0-15C-R4	0.8	14.1	8.002	29.2	2116.6	8.14274	410.126	411.63	1822.03	119.599	16.3145	53.3136	2.06321	0	0	13.2077	2.95429	1.86697	418.158
8.0-15C-R4	1	14.3	8.01	29.2	2117	8.14828	404.829	406.309	1817.44	121.665	16.0045	54.1103	2.12891	0	0	13.0764	3.00601	1.90044	412.839
8.0-15C-R4	1.5	14.3	8.01	29.2	2118	8.14828	405.024	406.505	1818.32	121.725	16.0122	54.1105	2.12892	0	0	13.078	3.00748	1.90137	413.038
8.0-15C-R4	2	14.6	8.03	29.2	2120.7	8.16481	389.057	390.474	1808.14	127.041	15.2396	56.207	2.27384	0	0	12.7635	3.1399	1.98633	396.874
8.0-15C-R4	2.5	14.2	8.041	29.2	2122.4	8.18152	371.57	372.931	1802.86	129.841	14.7351	57.5831	2.27699	0	0	12.608	3.20764	2.0275	378.884
8.0-15C-R4	3	14.5	8.048	29.2	2123.4	8.18464	369.397	370.744	1799.06	131.856	14.5141	58.2758	2.35816	0	0	12.4964	3.25853	2.06095	376.781
8.0-15C-R4	3.5	14.6	7.996	29.2	2115.7	8.12983	425.506	427.056	1824.54	118.275	16.6674	52.5169	2.09791	0	0	13.2871	2.92324	1.84927	434.056
8.0-15C-R4	4	14.3	8.016	29.2	2118.7	8.15446	398.635	400.093	1815.26	123.261	15.7596	54.763	2.15941	0	0	12.9851	3.04542	1.92536	406.523
8.0-15C-R4	4.5	13.8	8.056	29.2	2124.6	8.20237	351.045	352.336	1795.27	133.793	14.0949	59.4519	2.30164	0	0	12.3944	3.30384	2.08659	357.815
8.0-15C-R4	5	14.4	8.049	29.2	2123.6	8.18702	366.872	368.211	1798.64	132.095	14.4593	58.426	2.34924	0	0	12.4841	3.26407	2.06402	374.168
8.0-15C-R4	5.5	14.4	8.029	29.2	2120.6	8.16648	386.813	388.226	1808.79	126.703	15.2452	56.1639	2.24071	0	0	12.7838	3.13083	1.97977	394.506
8.0-15C-R4	6	14.6	8.019	29.2	2099.1	8.15347	396.672	398.117	1796.03	122.938	15.5379	54.9882	2.21524	0	0	12.9004	3.03849	1.92218	404.643
8.0-15C-R4	6.5	14.2	8.014	29.2	2098.4	8.15371	395.219	396.666	1798.68	121.506	15.6729	54.5739	2.13578	0	0	12.9878	3.00174	1.89735	402.999
8.0-15C-R5	0	15.8	8.043	31.4	2112.2	8.16118	382.764	384.137	1772.04	137.032	14.2805	63.4647	2.63867	0	0	11.9434	3.34582	2.13624	390.939
8.0-15C-R5	0.4	14.4	8.042	31.4	2138.2	8.17893	366.427	367.766	1795.99	137.96	14.2645	63.8775	2.4155	0	0	12.0259	3.36419	2.14151	373.708
8.0-15C-R5	0.8	14.7	8.09	31.4	2144.4	8.22401	326.166	327.352	1767.37	152.16	12.581	69.9652	2.75537	0	0	11.3616	3.7114	2.36403	332.747
8.0-15C-R5	1	14.2	8.07	31.4	2143.7	8.21032	337.33	338.565	1781.44	146.095	13.2128	67.5314	2.54867	0	0	11.6424	3.562	2.26649	343.963
8.0-15C-R5	1.5	14.2	8.066	31.4	2143.1	8.20622	340.968	342.217	1783.75	144.912	13.3553	67.0114	2.52475	0	0	11.6971	3.53314	2.24812	347.673
8.0-15C-R5	2	14.4	8.079	31.4	2144.14	8.21682	331.936	333.148	1775.28	148.801	12.9218	68.6298	2.63573	0	0	11.5155	3.62856	2.3098	338.531
8.0-15C-R5	2.5	14.3	8.068	31.4	2142.9	8.20692	340.506	341.751	1782.11	145.507	13.2962	67.2305	2.55244	0	0	11.6671	3.54795	2.25802	347.236
8.0-15C-R5	3	14.4	8.072	31.4	2143	8.20966	338.223	339.458	1779.3	146.699	13.1665	67.7108	2.5926	0	0	11.61	3.5773	2.27717	344.943
8.0-15C-R5	3.5	14.2	8.047	31.4	2139.5	8.18675	358.619	359.932	1793.83	139.341	14.0467	64.582	2.41405	0	0	11.9603	3.39732	2.1617	365.672
8.0-15C-R5	4	14.3	8.063	31.4	2131.1	8.20177	343.28	344.535	1775.48	143.26	13.4046	66.5805	2.5224	0	0	11.72	3.49316	2.22314	350.066
8.0-15C-R5	4.5	14.5	8.046	31.4	2138.3	8.18168	363.988	365.316	1793.31	139.103	14.1261	64.3403	2.45355	0	0	11.9666	3.39236	2.1599	371.257
8.0-15C-R5	5	14.4	8.047	31.4	2139	8.18405	361.582	362.902	1793.28	139.387	14.0758	64.5047	2.44417	0	0	11.9554	3.39899	2.16366	368.765
8.0-15C-R5	5.5	14.3	8.055	31.4	2140.8	8.1936	352.542	353.831	1789.39	141.691	13.7662	65.5574	2.47537	0	0	11.8463	3.45489	2.19879	359.511
8.0-15C-R5	6	14.5	8.022	31.4	2124.5	8.15705	386.098	387.506	1797.35	131.73	14.9842	61.3766	2.31827	0	0	12.2947	3.21255	2.04541	393.808
8.0-15C-R5	6.5	14.5	8.022	31.4	2124.5	8.15705	386.098	387.506	1797.35	131.73	14.9842	61.3766	2.31827	0	0	12.2947	3.21255	2.04541	393.808
8.0-15C-R6	0	15.8	8.043	31.4	2112.8	8.16119	382.875	384.249	1772.56	137.072	14.2847	63.4648	2.63868	0	0	11.9443	3.3468	2.13687	391.053
8.0-15C-R6	0.4	14.7	8.046	31.4	2127.3	8.17897	365.146	366.474	1783.69	138.438	14.0845	64.2609	2.48396	0	0	11.9464	3.37671	2.15084	372.513
8.0-15C-R6	0.8	14.5	8.034	31.4	2126.4	8.16936	373.998	375.362	1791.09	135.046	14.5146	62.844	2.38493	0	0	12.1221	3.2934	2.09689	381.467
8.0-15C-R6	1	14.4	8.065	31.4	2131.9	8.20247	342.978	344.231	1774.72	143.92	13.3516	66.7988	2.55007	0	0	11.6913	3.50953	2.23403	349.793
8.0-15C-R6	1.5	14.3	8.056	31.4	2134	8.19461	350.435	351.716	1782.84	141.501	13.6839	65.6832	2.48114	0	0	11.8224	3.45026	2.19584	357.362
8.0-15C-R6	2	14.3	8.06	31.4	2141.6	8.19872	347.866	349.138	1786.61	143.149	13.5836	66.1972	2.50474	0	0	11.777	3.49044	2.22141	354.742
8.0-15C-R6	2.5	14.4	8.064	31.4	2141.7	8.20147	345.539	346.801	1783.84	144.326	13.4513	66.6721	2.54418	0	0	11.7191	3.51942	2.24033	352.404
8.0-15C-R6	3	14.4	8.078	31.4	2154	8.21582	334.42	335.641	1784.43	149.223	13.0185	68.5004	2.62964	0	0	11.5428	3.63885	2.31635	341.064
8.0-15C-R6	3.5	14.3	8.047	31.4	2139.5	8.1854	360.141	361.458	1793.77	139.381	14.0629	64.5434	2.42907	0	0	11.9582	3.39857	2.16294	367.26
8.0-15C-R6	4	14.4	8.072	31.4	2153	8.20968	339.837	341.078	1787.88	147.412	13.2294	67.7133	2.59272	0	0	11.6239	3.59469	2.28824	346.589
8.0-15C-R6	4.5	14.4	8.045	31.4	2138.7	8.182	363.516	364.844	1794.39	138.816	14.1512	64.2533	2.43266	0	0	11.9836	3.38507	2.1548	370.739
8.0-15C-R6	5	14.4	8.054	31.4	2140.1	8.19123	354.893	356.189	1789.42	141.403	13.8155	65.3906	2.48488	0	0	11.8574	3.44816	2.19496	361.944
8.0-15C-R6	5.5	14.3	8.03	31.4	2126.8	8.16795	375.002	376.373	1794.2	133.922	14.6432	62.4262	2.33338	0	0	12.1854	3.26546	2.07823	382.414
8.0-15C-R6	6	14.5	8.074	31.4	2132.8	8.21034	336.148	337.374	1769.09	146.584	13.0456	67.929	2.62088	0	0	11.5662	3.57479	2.27605	342.861
8.0-15C-R6	6.5	14.5	8.074	31.4	2132.8	8.21034	336.148	337.374	1769.09	146.584	13.0456	67.929	2.62088	0	0	11.5662	3.57479	2.27605	342.861
8.4-15C-R1	0	16.4	8.021	31.8	2050	8.13053	402.245	403.677	1728.64	128.542	14.7085	61.6609	2.61901	0	0	12.0482	3.13238	2.00476	411.108
8.4-15C-R1	0.4	14.4	8.45	31.8	2324	8.59434	121.585	122.029	1555.82	314.579	4.72252	132.691	6.33838	0	0	8.05789	7.65223	4.8762	124.001
8.4-15C-R1	0.8	14.1	8.52	31.8	2404	8.66981	99.7282	100.094	1523.67	362.817	3.90951	147.365	7.3337	0	0	7.75793	8.82366	5.61916	101.679
8.4-15C-R1	1	14.3	8.498	31.8	2310	8.6445	103.446	103.825	1487.5	336.437	4.03035	142.583	7.0485	0	0	7.78929	8.18331	5.21353	105.491
8.4-15C-R1	1.5	14	8.511	31.8	2354	8.66202	99.9329	100.3	1501.4	349.96	3.92966	145.543	7.13643	0	0	7.76323	8.51036	5.41852	101.878
8.4-15C-R1	2	14.2	8.497	31.8	2394	8.645	107.301	107.694	1546.53	349.003	4.19342	142.476	6.99134	0	0	7.86013	8.48833	5.40673	109.411
8.4-15C-R1	2.5	13.9	8.497	31.8	2450	8.64934	108.51	108.909	1585.17	357.619	4.28015	142.727	6.86651	0	0	7.90389	8.696	5.53558	110.611
8.4-15C-R1	3	13.9	8.489	31.8	2481	8.64124	112.773	113.187	1617.04	358.075	4.4483	141.076	6.73978	0	0	7.96718	8.70708	5.54264	114.956
8.4-15C-R1	3.5	14.2	8.499	31.8	2370	8.64701	105.493	105.879	1527.49	346.3	4.12275	142.885	7.02365	0	0	7.83197	8.42259	5.36486	107.567
8.4-15C-R1	4	14.1	8.486	31.8	2378	8.63522	109.828	110.231	1549.51	340.723	4.30544	140.273	6.77224	0	0	7.90486	8.28633	5.27697	111.976
8.4-15C-R1	4.5	14.3	8.51	31.8	2394	8.6568	103.415	103.794	1529.77	355.937	4.02915	145.105	7.25098	0	0	7.79579	8.65763	5.51572	105.459
8.4-15C-R1	5	14.2	8.488	31.8	2358	8.63581	108.644	109.042	1533.1	338.728	4.24592	140.603	6.84493	0	0	7.87827	8.23841	5.24754	110.78
8.4-15C-R1	5.5	14.3	8.49	31.8	2396	8.63648	110.284	110.687	1556.8	345.669	4.29674	140.948	6.91954	0	0	7.89634	8.40785	5.35659	112.463
8.4-15C-R1	6	14.1	8.495	31.8	2366	8.64435	106.179	106.568	1529.86	343.549	4.16239	142.132	6.91613	0	0	7.84965	8.35505	5.32074	108.256
8.4-15C-R1	6.5	14.2	8.487	31.8	2342	8.63478	108.206	108.602	1523.27	335.754	4.22879	140.392	6.82861	0	0	7.87091	8.16609	5.20148	110.333
8.4-15C-R2	0	16.4	8.021	31.8	2050	8.13053	402.245	403.677	1728.64	128.542	14.7085	61.6609	2.61901	0	0	12.0482	3.13238	2.00476	411.108
8.4-15C-R2	0.4	14.5	8.444	31.8	2312	8.58682	123.74	124.191	1554.4	309.954	4.79147	131.408	6.28778	0	0	8.08242	7.54031	4.80589	126.21
8.4-15C-R2	0.8	14.1	8.51	31.8	2380	8.65962	101.873	102.247	1520.33	353.623	3.99361	145.261	7.16355	0	0	7.7869	8.60006	5.47677	103.866
8.4-15C-R2	1	14.4	8.489	31.8	2400	8.63405	111.315	111.722	1560.79	345.802	4.32362	140.664	6.94529	0	0	7.9037	8.41174	5.36018	113.527
8.4-15C-R2	1.5	14.1	8.498	31.8	2346	8.64738	104.234	104.616	1512.32	341.983	4.08614	142.75	6.96445	0	0	7.81922	8.31698	5.2965	106.273
8.4-15C-R2	2	14.3	8.508	31.8	2354	8.65472	102.234	102.608	1505.07	348.517	3.98313	144.677	7.21633	0	0	7.7751	8.47715	5.40073	104.255
8.4-15C-R2	2.5	14	8.503	31.8	2352	8.65389	102.418	102.794	1510.18	345.473	4.02738	143.871	7.00399	0	0	7.80009	8.40125	5.34905	104.411
8.4-15C-R2	3	14	8.493	31.8	2458	8.64386	110.757	111.164	1595.86	356.739	4.3553	141.82	6.84409	0	0	7.92921	8.67521	5.52349	112.913
8.4-15C-R2	3.5	14.4	8.489	31.8	2341	8.63398	108.425	108.821	1520	336.707	4.21134	140.649	6.94411	0	0	7.85826	8.19049	5.2192	110.578
8.4-15C-R2	4	14.2	8.486	31.8	2442.1	8.63389	113.453	113.869	1593.88	350.6	4.43385	140.212	6.81467	0	0	7.95226	8.52715	5.43146	115.684
8.4-15C-R2	4.5	14.5	8.498	31.8	2364	8.64173	106.945	107.335	1524.5	344.964	4.14115	142.44	7.13526	0	0	7.82993	8.39201	5.34873	109.08
8.4-15C-R2	5	14.2	8.472	31.8	2426	8.61965	117.731	118.162	1600.62	340.725	4.60105	137.333	6.59482	0	0	8.01531	8.28698	5.27848	120.046
8.4-15C-R2	5.5	14.3	8.479	31.8	2384	8.62529	113.569	113.985	1562.4	338.089	4.42475	138.679	6.74353	0	0	7.94471	8.22349	5.23913	115.814
8.4-15C-R2	6	14.1	8.48	31.8	2371	8.62912	111.576	111.985	1552.19	336.547	4.37397	139.036	6.67768	0	0	7.93094	8.18478	5.2123	113.759
8.4-15C-R2	6.5	14.3	8.497	31.8	2373	8.64356	106.774	107.165	1532.04	345.766	4.16001	142.392	7.03332	0	0	7.84341	8.41023	5.3581	108.884
8.4-15C-R3	0	16	7.981	29.2	2032	8.09566	450.746	452.359	1758.26	110.511	16.9222	50.5184	2.20548	0	0	13.347	2.73615	1.73614	460.484
8.4-15C-R3	0.4	14.2	8.479	29.2	2287.7	8.62808	113.356	113.771	1537.91	309.701	4.49528	124.025	6.36685	0	0	8.17617	7.65098	4.83606	115.588
8.4-15C-R3	0.8	14	8.488	29.2	2291	8.64009	109.424	109.826	1529.7	314.511	4.3663	125.852	6.42478	0	0	8.12777	7.7681	4.90807	111.556
8.4-15C-R3	1	14.2	8.474	29.2	2286.7	8.623	115.075	115.497	1543.07	307.125	4.56345	123.094	6.29278	0	0	8.20531	7.58732	4.79582	117.34
8.4-15C-R3	1.5	14.2	8.474	29.2	2286.7	8.623	115.075	115.497	1543.07	307.125	4.56345	123.094	6.29278	0	0	8.20531	7.58732	4.79582	117.34
8.4-15C-R3	2	14.4	8.44	29.2	2278.4	8.5856	128.41	128.879	1576.18	289.816	5.06095	116.714	5.8817	0	0	8.41318	7.16133	4.52844	130.964
8.4-15C-R3	2.5	14	8.469	29.2	2286.4	8.62077	115.829	116.254	1548.79	304.58	4.62188	122.308	6.14523	0	0	8.2372	7.52282	4.75309	118.086
8.4-15C-R3	3	14.3	8.483	29.2	2287.2	8.63072	112.424	112.836	1532.79	311.622	4.44459	124.699	6.46537	0	0	8.15129	7.69928	4.86759	114.649
8.4-15C-R3	3.5	14.3	8.447	29.2	2278.4	8.59413	125.136	125.594	1568.26	293.072	4.94714	118.054	5.943	0	0	8.36764	7.24097	4.57784	127.612
8.4-15C-R3	4	14.2	8.452	29.2	2280.2	8.60064	122.791	123.241	1563.89	295.647	4.86945	119.036	5.97694	0	0	8.33745	7.30378	4.6166	125.209
8.4-15C-R3	4.5	13.7	8.472	29.2	2289.1	8.62812	113.389	113.807	1547.35	306.297	4.56691	123.078	6.07766	0	0	8.2236	7.5628	4.77544	115.565
8.4-15C-R3	5	14.5	8.438	29.2	2277.3	8.58214	129.7	130.173	1577.59	288.77	5.09607	116.283	5.88946	0	0	8.42481	7.1363	4.51355	132.293
8.4-15C-R3	5.5	14.3	8.467	29.2	2284.6	8.61446	118	118.432	1549.69	303.479	4.66502	121.725	6.22778	0	0	8.2455	7.4981	4.7404	120.335
8.4-15C-R3	6	14.3	8.446	29.2	2280.3	8.59312	125.63	126.089	1570.78	292.859	4.96666	117.872	5.92916	0	0	8.37581	7.23572	4.57452	128.116
8.4-15C-R3	6.5	14	8.477	29.2	2288.7	8.62891	113.113	113.528	1541.06	308.792	4.51348	123.795	6.26143	0	0	8.19059	7.62682	4.81881	115.317
8.4-15C-R4	0	16	7.981	29.2	2032	8.09566	450.746	452.359	1758.26	110.511	16.9222	50.5184	2.20548	0	0	13.347	2.73615	1.73614	460.484
8.4-15C-R4	0.4	14.3	8.475	29.2	2286.2	8.62259	115.199	115.62	1541.49	307.578	4.55427	123.208	6.34548	0	0	8.19803	7.59938	4.80443	117.478
8.4-15C-R4	0.8	14	8.493	29.2	2292	8.64518	107.78	108.175	1524.46	317.124	4.30068	126.793	6.50044	0	0	8.09993	7.83264	4.94885	109.88
8.4-15C-R4	1	14.3	8.471	29.2	2285.4	8.61852	116.592	117.019	1545.6	305.524	4.60936	122.466	6.28635	0	0	8.22161	7.54863	4.77235	118.899
8.4-15C-R4	1.5	14.3	8.471	29.2	2285.4	8.61852	116.592	117.019	1545.6	305.524	4.60936	122.466	6.28635	0	0	8.22161	7.54863	4.77235	118.899
8.4-15C-R4	2	14.4	8.441	29.2	2278.6	8.58661	128.03	128.497	1575.19	290.313	5.04595	116.895	5.89548	0	0	8.40666	7.17361	4.5362	130.576
8.4-15C-R4	2.5	14.2	8.471	29.2	2286.1	8.61995	116.117	116.543	1546.15	305.585	4.60479	122.537	6.24874	0	0	8.22303	7.54928	4.77177	118.403
8.4-15C-R4	3	14.5	8.458	29.2	2281.4	8.60246	122.213	122.659	1557.72	298.79	4.8019	119.927	6.17154	0	0	8.29747	7.38393	4.67017	124.656
8.4-15C-R4	3.5	14.6	8.452	29.2	2278.8	8.59494	124.887	125.342	1562.7	295.613	4.89192	118.758	6.12204	0	0	8.33285	7.30625	4.62201	127.397
8.4-15C-R4	4	14.4	8.444	29.2	2278.5	8.58966	126.853	127.317	1571.71	291.711	4.99959	117.439	5.93699	0	0	8.38663	7.20815	4.55804	129.376
8.4-15C-R4	4.5	13.7	8.468	29.2	2289	8.62405	114.796	115.219	1551.96	304.345	4.62359	122.335	6.02101	0	0	8.24799	7.5146	4.745	116.999
8.4-15C-R4	5	14.5	8.431	29.2	2275.9	8.57503	132.415	132.898	1584.46	285.316	5.20274	115.021	5.79381	0	0	8.47125	7.05096	4.45957	135.062
8.4-15C-R4	5.5	14.4	8.463	29.2	2283.1	8.60897	119.91	120.348	1553.21	301.383	4.72595	120.916	6.20687	0	0	8.26825	7.44715	4.70917	122.295
8.4-15C-R4	6	14.5	8.438	29.2	2277.3	8.58214	129.7	130.173	1577.59	288.77	5.09607	116.283	5.88946	0	0	8.42481	7.1363	4.51355	132.293
8.4-15C-R4	6.5	14.1	8.463	29.2	2285.2	8.61325	118.452	118.886	1554.86	301.559	4.71192	121.128	6.0961	0	0	8.27254	7.449	4.70742	120.772
8.4-15C-R5	0	15.8	8.043	31.4	2131.8	8.16122	386.398	387.785	1788.99	138.352	14.4162	63.4685	2.63886	0	0	11.972	3.37807	2.15683	394.651
8.4-15C-R5	0.4	14.4	8.549	31.4	2431	8.69529	93.8441	94.1868	1510.36	380.965	3.65321	150.776	7.93165	0	0	7.68656	9.28996	5.91363	95.7086
8.4-15C-R5	0.8	14.3	8.508	31.4	2422.7	8.65503	106.142	106.53	1558.87	357.171	4.14466	142.321	7.1626	0	0	7.86829	8.70901	5.54266	108.24
8.4-15C-R5	1	14.3	8.485	31.4	2417.7	8.63166	113.89	114.306	1585.03	344.136	4.44722	137.615	6.78731	0	0	7.98258	8.39117	5.34038	116.141
8.4-15C-R5	1.5	14.4	8.447	31.4	2408.6	8.59164	128.278	128.747	1626.23	323.103	4.99368	129.916	6.24768	0	0	8.19111	7.87898	5.01545	130.827
8.4-15C-R5	2	14.2	8.435	31.4	2407.4	8.58228	131.891	132.374	1640.19	316.756	5.16603	127.698	6.00174	0	0	8.26573	7.72293	4.91407	134.485
8.4-15C-R5	2.5	14.2	8.465	31.4	2413.3	8.61276	120.486	120.928	1607.28	332.964	4.71932	133.654	6.43803	0	0	8.09053	8.11811	5.16552	122.856
8.4-15C-R5	3	14.1	8.462	31.4	2413.3	8.61113	121.085	121.529	1611.09	331.366	4.75742	133.128	6.35442	0	0	8.10854	8.0785	5.13925	123.454
8.4-15C-R5	3.5	14.1	8.503	31.4	2422.3	8.65279	106.872	107.264	1565.18	354.34	4.19901	141.45	6.99431	0	0	7.89443	8.6386	5.49557	108.963
8.4-15C-R5	4	14.2	8.439	31.4	2407.6	8.58634	130.285	130.762	1635.45	318.807	5.10313	128.484	6.05814	0	0	8.24093	7.77295	4.9459	132.847
8.4-15C-R5	4.5	14.4	8.474	31.4	2413.9	8.61906	118.211	118.642	1596.28	337.826	4.60177	135.312	6.65491	0	0	8.03876	8.23799	5.24398	120.559
8.4-15C-R5	5	14.3	8.45	31.4	2410	8.5961	126.612	127.075	1623.57	324.794	4.94401	130.586	6.25377	0	0	8.17494	7.91956	5.04023	129.115
8.4-15C-R5	5.5	14.4	8.458	31.4	2411	8.60281	124.103	124.556	1614.31	329.092	4.83116	132.103	6.41049	0	0	8.12758	8.02501	5.10841	126.569
8.4-15C-R5	6	14.4	8.449	31.4	2409.1	8.59367	127.513	127.979	1624.12	324.197	4.96391	130.313	6.27698	0	0	8.17944	7.90564	5.03243	130.047
8.4-15C-R5	6.5	14.4	8.449	31.4	2409.1	8.59367	127.513	127.979	1624.12	324.197	4.96391	130.313	6.27698	0	0	8.17944	7.90564	5.03243	130.047
8.4-15C-R6	0	15.8	8.043	31.4	2131.8	8.16122	386.398	387.785	1788.99	138.352	14.4162	63.4685	2.63886	0	0	11.972	3.37807	2.15683	394.651
8.4-15C-R6	0.4	14.7	8.548	31.4	2428.7	8.68999	95.3058	95.6525	1510.04	380.141	3.67617	150.321	8.05679	0	0	7.68667	9.27219	5.90605	97.2288
8.4-15C-R6	0.8	14.4	8.504	31.4	2421.1	8.64954	107.896	108.29	1562.92	354.812	4.20022	141.419	7.13874	0	0	7.88615	8.65221	5.50766	110.039
8.4-15C-R6	1	14.4	8.483	31.4	2416.5	8.62821	115.053	115.473	1586.69	342.94	4.47883	137.132	6.7965	0	0	7.9916	8.36271	5.32338	117.338
8.4-15C-R6	1.5	14.5	8.452	31.4	2409.1	8.59531	126.888	127.351	1620.36	325.775	4.92443	130.833	6.35943	0	0	8.16069	7.94479	5.0584	129.422
8.4-15C-R6	2	14.3	8.437	31.4	2407.1	8.5829	131.639	132.12	1637.48	317.768	5.1403	128.017	6.0665	0	0	8.25217	7.74823	4.93119	134.241
8.4-15C-R6	2.5	14.4	8.462	31.4	2411.9	8.60688	122.616	123.064	1609.95	331.289	4.77327	132.902	6.47074	0	0	8.10507	8.07859	5.14252	125.052
8.4-15C-R6	3	14.3	8.472	31.4	2414.8	8.61845	118.478	118.911	1599.49	336.873	4.62637	134.985	6.58401	0	0	8.05136	8.21408	5.22767	120.82
8.4-15C-R6	3.5	14.3	8.488	31.4	2418.3	8.63471	112.85	113.262	1581.62	345.813	4.40661	138.226	6.83512	0	0	7.96709	8.43208	5.36641	115.08
8.4-15C-R6	4	14.4	8.471	31.4	2413.9	8.61602	119.325	119.761	1600.07	336.259	4.64515	134.708	6.60839	0	0	8.05546	8.19978	5.21966	121.696
8.4-15C-R6	4.5	14.4	8.464	31.4	2412.4	8.60891	121.881	122.326	1607.8	332.398	4.74466	133.302	6.50108	0	0	8.09396	8.10563	5.15973	124.303
8.4-15C-R6	5	14.4	8.44	31.4	2407.1	8.58453	130.999	131.478	1633.76	319.33	5.0996	128.534	6.14624	0	0	8.23274	7.78695	4.95687	133.602
8.4-15C-R6	5.5	14.4	8.458	31.4	2411.1	8.60281	124.109	124.562	1614.38	329.107	4.83137	132.103	6.41049	0	0	8.12766	8.02537	5.10864	126.575
8.4-15C-R6	6	14.4	8.44	31.4	2407.1	8.58453	130.999	131.478	1633.76	319.33	5.0996	128.534	6.14624	0	0	8.23274	7.78695	4.95687	133.602
8.4-15C-R6	6.5	14.4	8.44	31.4	2407.1	8.58453	130.999	131.478	1633.76	319.33	5.0996	128.534	6.14624	0	0	8.23274	7.78695	4.95687	133.602
7.6-18C-R1	0	16.4	8.021	31.8	2050	8.13053	402.245	403.677	1728.64	128.542	14.7085	61.6609	2.61901	0	0	12.0482	3.13238	2.00476	411.108
7.6-18C-R1	0.4	17.2	7.665	31.8	2058	7.75262	1068.49	1072.25	1905.86	60.9726	38.1608	29.0294	1.17973	0	0	17.1562	1.48708	0.953499	1093.04
7.6-18C-R1	0.8	17.5	7.631	31.8	2082	7.71355	1193.78	1197.98	1939.48	57.2777	42.2644	26.8805	1.10783	0	0	17.4747	1.39744	0.896652	1221.65
7.6-18C-R1	1	17.4	7.615	31.8	2012	7.69794	1197.1	1201.31	1878.35	53.3364	42.5055	25.941	1.05912	0	0	17.4828	1.30113	0.83466	1224.9
7.6-18C-R1	1.5	17.5	7.637	31.8	2036	7.71983	1149.12	1153.16	1894.14	56.7547	40.6832	27.2443	1.12399	0	0	17.3476	1.38468	0.888465	1175.95
7.6-18C-R1	2	17.2	7.617	31.8	2128	7.70229	1251.25	1255.66	1987.64	56.6305	44.688	26.0721	1.05064	0	0	17.6815	1.38118	0.885597	1280
7.6-18C-R1	2.5	17.2	7.638	31.8	2066	7.72434	1150.25	1154.3	1922.34	57.6221	41.0808	27.3315	1.10534	0	0	17.4189	1.40536	0.901103	1176.68
7.6-18C-R1	3	16.8	7.63	31.8	2094	7.72056	1172.6	1176.75	1951.63	57.2243	42.3736	26.8795	1.05675	0	0	17.5685	1.39506	0.893666	1198.98
7.6-18C-R1	3.5	16.9	7.639	31.8	1952	7.72887	1070.86	1074.65	1814.67	54.4185	38.5835	27.4203	1.087	0	0	17.2331	1.3268	0.850133	1095.09
7.6-18C-R1	4	16.8	7.618	31.8	1992	7.70795	1149.79	1153.87	1858.94	52.9471	41.5495	26.1638	1.02652	0	0	17.4832	1.29078	0.826868	1175.67
7.6-18C-R1	4.5	17.5	7.61	31.8	1944	7.69157	1175.39	1179.52	1815.39	50.9682	41.6132	25.6445	1.05318	0	0	17.3861	1.2435	0.797879	1202.83
7.6-18C-R1	5	17.2	7.616	31.8	1960	7.70128	1154.06	1158.13	1828.98	51.9885	41.2172	26.0155	1.04818	0	0	17.4023	1.26797	0.813005	1180.58
7.6-18C-R1	5.5	17.7	7.596	31.8	2052	7.67462	1296.72	1301.26	1921.69	52.2322	45.643	24.8333	1.03126	0	0	17.6381	1.27464	0.818244	1327.32
7.6-18C-R1	6	17.3	7.638	31.8	2059	7.72318	1150.62	1154.67	1915.66	57.4606	40.9741	27.3227	1.11242	0	0	17.3976	1.40158	0.898888	1177.2
7.6-18C-R1	6.5	17.3	7.638	31.8	2059	7.72318	1150.62	1154.67	1915.66	57.4606	40.9741	27.3227	1.11242	0	0	17.3976	1.40158	0.898888	1177.2
7.6-18C-R2	0	16.4	8.021	31.8	2050	8.13053	402.245	403.677	1728.64	128.542	14.7085	61.6609	2.61901	0	0	12.0482	3.13238	2.00476	411.108
7.6-18C-R2	0.4	17.1	7.61	31.8	2154.2	7.69607	1285.12	1289.66	2014.73	56.398	46.0324	25.6713	1.02637	0	0	17.7786	1.37536	0.881657	1314.5
7.6-18C-R2	0.8	17.2	7.643	31.8	2059	7.72958	1131.58	1135.57	1914.12	58.0724	40.4143	27.6392	1.11877	0	0	17.3641	1.41635	0.908145	1157.59
7.6-18C-R2	1	17.4	7.669	31.8	2064	7.75446	1068.71	1072.47	1910	61.7743	37.9466	29.2677	1.20635	0	0	17.1089	1.50697	0.966706	1093.53
7.6-18C-R2	1.5	17.3	7.585	31.8	2050	7.66756	1313.04	1317.66	1923.29	50.7543	46.7581	24.2491	0.978697	0	0	17.7302	1.238	0.793978	1343.37
7.6-18C-R2	2	17.1	7.65	31.8	2002	7.73808	1076	1079.8	1858.2	57.2993	38.5419	28.0846	1.13061	0	0	17.2091	1.39734	0.895747	1100.6
7.6-18C-R2	2.5	17.1	7.622	31.8	2088	7.7087	1207.15	1211.41	1948.29	56.1467	43.2394	26.3755	1.05664	0	0	17.5907	1.36923	0.877729	1234.74
7.6-18C-R2	3	16.7	7.693	31.8	2038	7.78784	965.162	968.585	1877.71	64.0679	34.9805	30.9477	1.22267	0	0	16.8586	1.56173	1.00021	986.765
7.6-18C-R2	3.5	16.9	7.654	31.8	2080	7.7446	1098.67	1102.56	1930.48	60.0269	39.5855	28.3559	1.1271	0	0	17.3279	1.46354	0.937749	1123.52
7.6-18C-R2	4	16.7	7.648	31.8	1954	7.74065	1039.38	1043.07	1813.89	55.5176	37.6704	27.9973	1.09677	0	0	17.1737	1.35331	0.866722	1062.64
7.6-18C-R2	4.5	17.3	7.65	31.8	2006	7.73576	1086.37	1090.2	1861.84	57.4864	38.6865	28.0657	1.1451	0	0	17.1986	1.40221	0.899292	1111.47
7.6-18C-R2	5	17.1	7.639	31.8	1972	7.72655	1090.21	1094.05	1833.41	55.0536	39.0506	27.4023	1.10099	0	0	17.2524	1.34257	0.860641	1115.12
7.6-18C-R2	5.5	17.6	7.667	31.8	1976	7.75004	1035.6	1039.23	1827.87	58.9086	36.5577	29.1172	1.21585	0	0	16.9524	1.4374	0.922507	1059.9
7.6-18C-R2	6	17.2	7.668	31.8	2063	7.75576	1062.83	1066.58	1909.54	61.5335	37.9589	29.2237	1.18829	0	0	17.1347	1.50076	0.96227	1087.26
7.6-18C-R2	6.5	17.2	7.668	31.8	2063	7.75576	1062.83	1066.58	1909.54	61.5335	37.9589	29.2237	1.18829	0	0	17.1347	1.50076	0.96227	1087.26
7.6-18C-R3	0	16	7.981	29.2	2032	8.09566	450.746	452.359	1758.26	110.511	16.9222	50.5184	2.20548	0	0	13.347	2.73615	1.73614	460.484
7.6-18C-R3	0.4	17.4	7.612	29.2	2055.3	7.69462	1266.04	1270.49	1930.6	50.522	45.6015	22.6777	0.994454	0	0	18.2026	1.25341	0.797841	1295.47
7.6-18C-R3	0.8	17.5	7.605	29.2	2054.2	7.68613	1293.04	1297.58	1931.46	49.7327	46.4383	22.3153	0.984027	0	0	18.2222	1.23401	0.78568	1323.26
7.6-18C-R3	1	17.4	7.574	29.2	2049.7	7.65467	1391.64	1396.53	1935.61	46.201	50.1254	20.804	0.907048	0	0	18.3192	1.14621	0.729603	1423.99
7.6-18C-R3	1.5	17.4	7.574	29.2	2049.7	7.65467	1391.64	1396.53	1935.61	46.201	50.1254	20.804	0.907048	0	0	18.3192	1.14621	0.729603	1423.99
7.6-18C-R3	2	17.5	7.589	29.2	2051.9	7.66932	1345.6	1350.33	1933.66	47.899	48.326	21.5207	0.946667	0	0	18.2765	1.18852	0.756711	1377.05
7.6-18C-R3	2.5	17.4	7.619	29.2	2056.3	7.70197	1244.11	1248.48	1929.56	51.3568	44.8116	23.0392	1.01143	0	0	18.1686	1.27412	0.811024	1273.03
7.6-18C-R3	3	17.4	7.635	29.2	2058.7	7.71877	1195.41	1199.61	1927.15	53.3157	43.0576	23.8852	1.05132	0	0	18.0769	1.32272	0.841959	1223.21
7.6-18C-R3	3.5	17.5	7.592	29.2	2052.3	7.67248	1335.57	1340.26	1933.23	48.2372	47.9658	21.6677	0.953563	0	0	18.2678	1.19691	0.762054	1366.79
7.6-18C-R3	4	17.2	7.605	29.2	2054.2	7.68953	1278.79	1283.3	1931.67	49.6265	46.3316	22.3333	0.965305	0	0	18.2538	1.23082	0.783098	1308.22
7.6-18C-R3	4.5	17.3	7.619	29.2	2056.3	7.70311	1239.5	1243.86	1929.63	51.3213	44.7763	23.0458	1.005	0	0	18.1789	1.27304	0.810151	1268.16
7.6-18C-R3	5	17.3	7.625	29.2	2057.2	7.70942	1221.07	1225.37	1928.74	52.048	44.1108	23.3601	1.0197	0	0	18.1467	1.29107	0.821623	1249.31
7.6-18C-R3	5.5	17.5	7.634	29.2	2058.5	7.71657	1202.85	1207.08	1927.19	53.2256	43.1993	23.8242	1.05547	0	0	18.0729	1.32068	0.840861	1230.97
7.6-18C-R3	6	17.4	7.619	29.2	2056.3	7.70197	1244.11	1248.48	1929.56	51.3568	44.8116	23.0392	1.01143	0	0	18.1686	1.27412	0.811024	1273.03
7.6-18C-R3	6.5	17.4	7.611	29.2	2055.1	7.69357	1269.17	1273.63	1930.7	50.4023	45.7143	22.6264	0.992049	0	0	18.2071	1.25044	0.795951	1298.68
7.6-18C-R4	0	16	7.981	29.2	2032	8.09566	450.746	452.359	1758.26	110.511	16.9222	50.5184	2.20548	0	0	13.347	2.73615	1.73614	460.484
7.6-18C-R4	0.4	17.2	7.597	29.2	2047.4	7.68111	1300.95	1305.53	1927.41	48.5667	47.1341	21.9317	0.946777	0	0	18.2749	1.20453	0.766374	1330.88
7.6-18C-R4	0.8	17.4	7.601	29.2	2048	7.68306	1297.58	1302.14	1926.74	49.0967	46.7377	22.1201	0.968337	0	0	18.2394	1.21805	0.775332	1327.75
7.6-18C-R4	1	17.3	7.584	29.2	2045.4	7.66631	1348.65	1353.4	1928.94	47.1342	48.7194	21.288	0.923332	0	0	18.3019	1.16918	0.744054	1379.84
7.6-18C-R4	1.5	17.3	7.584	29.2	2045.4	7.66631	1348.65	1353.4	1928.94	47.1342	48.7194	21.288	0.923332	0	0	18.3019	1.16918	0.744054	1379.84
7.6-18C-R4	2	17.4	7.628	29.2	2052.3	7.71143	1213.28	1217.55	1923.15	52.3126	43.7012	23.5117	1.03369	0	0	18.1106	1.29783	0.826117	1241.49
7.6-18C-R4	2.5	17.4	7.629	29.2	2052.5	7.71248	1210.29	1214.54	1923.05	52.4364	43.5934	23.5648	1.03619	0	0	18.1048	1.3009	0.828072	1238.43
7.6-18C-R4	3	17.3	7.62	29.2	2051	7.70417	1233.09	1237.43	1924.31	51.304	44.5448	23.098	1.00744	0	0	18.1649	1.27261	0.809878	1261.61
7.6-18C-R4	3.5	17.3	7.637	29.2	2053.7	7.72202	1181.93	1186.09	1921.89	53.3902	42.6966	24.0004	1.04972	0	0	18.0654	1.32436	0.842811	1209.26
7.6-18C-R4	4	17.3	7.649	29.2	2055.6	7.73462	1147.05	1151.09	1920.06	54.9092	41.4367	24.6564	1.08062	0	0	17.9825	1.36204	0.866789	1173.58
7.6-18C-R4	4.5	17.4	7.648	29.2	2055.5	7.73241	1154.28	1158.34	1920.2	54.8183	41.5761	24.5932	1.08486	0	0	17.98	1.35999	0.865687	1181.12
7.6-18C-R4	5	17.3	7.633	29.2	2053.1	7.71782	1193.8	1198	1922.51	52.8934	43.1255	23.7852	1.03962	0	0	18.0908	1.31204	0.834968	1221.41
7.6-18C-R4	5.5	17.4	7.666	29.2	2058.3	7.75128	1103.51	1107.39	1917.25	57.1642	39.7473	25.6045	1.13303	0	0	17.8385	1.41819	0.902734	1129.17
7.6-18C-R4	6	17.3	7.608	29.2	2049.2	7.69155	1270.55	1275.02	1926	49.8792	45.898	22.4796	0.978597	0	0	18.2221	1.23727	0.787387	1299.93
7.6-18C-R4	6.5	17.3	7.619	29.2	2050.89	7.70312	1236.19	1240.55	1924.49	51.1849	44.657	23.0458	1.005	0	0	18.1702	1.26966	0.807999	1264.79
7.6-18C-R5	0	15.8	8.043	31.4	2131.8	8.16122	386.398	387.785	1788.99	138.352	14.4162	63.4685	2.63886	0	0	11.972	3.37807	2.15683	394.651
7.6-18C-R5	0.4	17	7.573	31.4	2133	7.65824	1399.64	1404.58	2007.41	50.7617	50.3927	23.1681	0.924558	0	0	18.0247	1.24101	0.794516	1431.47
7.6-18C-R5	0.8	17.1	7.652	31.4	2145.5	7.74017	1152.86	1156.93	1994.49	61.1102	41.3862	27.6812	1.12667	0	0	17.5434	1.49418	0.95682	1179.22
7.6-18C-R5	1	17.3	7.627	31.4	2141.6	7.71163	1236.72	1241.08	1998.92	57.7344	44.1377	26.1559	1.07426	0	0	17.7212	1.41197	0.904598	1265.3
7.6-18C-R5	1.5	17.2	7.644	31.4	2144.3	7.73062	1180.73	1184.89	1995.98	60.0252	42.2626	27.1811	1.11217	0	0	17.6017	1.46782	0.94016	1207.86
7.6-18C-R5	2	16.7	7.61	31.4	2138.9	7.70063	1261.84	1266.31	2002.18	55.2635	45.8342	25.2177	0.991983	0	0	17.8899	1.35061	0.864088	1290.08
7.6-18C-R5	2.5	17.1	7.639	31.4	2143.5	7.72653	1191.11	1195.32	1996.95	59.2936	42.7594	26.887	1.09183	0	0	17.6512	1.44976	0.928378	1218.35
7.6-18C-R5	3	17.1	7.635	31.4	2142.9	7.72233	1203.14	1207.39	1997.7	58.7452	43.1911	26.6468	1.08133	0	0	17.6821	1.43636	0.919791	1230.65
7.6-18C-R5	3.5	17	7.575	31.4	2133.4	7.66035	1392.73	1397.65	2007.21	51.0037	50.1439	23.2737	0.929054	0	0	18.0186	1.24693	0.798303	1424.4
7.6-18C-R5	4	17.3	7.694	31.4	2152.2	7.78178	1045.34	1049.02	1985.77	67.4086	37.3074	30.3676	1.26258	0	0	17.1098	1.64857	1.05618	1069.49
7.6-18C-R5	4.5	17.3	7.607	31.4	2138.4	7.69063	1300.11	1304.69	2002.19	55.0996	46.3999	25.0042	1.02356	0	0	17.8473	1.34753	0.863315	1330.15
7.6-18C-R5	5	17.3	7.635	31.4	2141	7.72002	1211.13	1215.4	1995.76	58.7678	43.2244	26.6298	1.09523	0	0	17.6599	1.43725	0.92079	1239.12
7.6-18C-R5	5.5	17.3	7.635	31.4	2142.9	7.72002	1212.22	1216.49	1997.55	58.8206	43.2633	26.6298	1.09523	0	0	17.663	1.43854	0.921617	1240.23
7.6-18C-R5	6	17.3	7.635	31.4	2142.9	7.72002	1212.22	1216.49	1997.55	58.8206	43.2633	26.6298	1.09523	0	0	17.663	1.43854	0.921617	1240.23
7.6-18C-R5	6.5	17.3	7.635	31.4	2142.9	7.72002	1212.22	1216.49	1997.55	58.8206	43.2633	26.6298	1.09523	0	0	17.663	1.43854	0.921617	1240.23
7.6-18C-R6	0	15.8	8.043	31.4	2131.8	8.16122	386.398	387.785	1788.99	138.352	14.4162	63.4685	2.63886	0	0	11.972	3.37807	2.15683	394.651
7.6-18C-R6	0.4	17.1	7.614	31.4	2139.5	7.70027	1268.06	1272.54	2001.21	55.9334	45.5218	25.4169	1.02777	0	0	17.8262	1.36761	0.875766	1297.06
7.6-18C-R6	0.8	17.2	7.637	31.4	2143.2	7.72327	1201.63	1205.87	1997.25	59.0566	43.0108	26.7581	1.09353	0	0	17.6573	1.44414	0.924989	1229.25
7.6-18C-R6	1	17.2	7.658	31.4	2146.5	7.74529	1139.97	1143.99	1993.31	62.0054	40.8037	28.045	1.1504	0	0	17.4811	1.51625	0.971176	1166.17
7.6-18C-R6	1.5	17.1	7.648	31.4	2144.9	7.73597	1164.51	1168.62	1995.28	60.5464	41.8045	27.4347	1.11584	0	0	17.5778	1.4804	0.947993	1191.14
7.6-18C-R6	2	16.8	7.598	31.4	2137	7.68684	1305.2	1309.83	2003.99	53.7645	47.2699	24.5346	0.969751	0	0	17.9452	1.31412	0.840936	1334.58
7.6-18C-R6	2.5	17	7.646	31.4	2144.6	7.73504	1165.97	1170.09	1995.74	60.2286	41.9796	27.3212	1.1034	0	0	17.6039	1.47246	0.942691	1192.49
7.6-18C-R6	3	17	7.594	31.4	2136.4	7.68036	1328.19	1332.88	2004.48	53.3364	47.8202	24.2999	0.972871	0	0	17.9443	1.30396	0.834814	1358.39
7.6-18C-R6	3.5	17.3	7.652	31.4	2145.5	7.73784	1161.62	1165.71	1994.34	61.1858	41.4574	27.6624	1.1411	0	0	17.5249	1.49638	0.958675	1188.46
7.6-18C-R6	4	17.3	7.591	31.4	2135.9	7.67382	1353.1	1357.86	2004.67	53.073	48.291	24.1161	0.984696	0	0	17.9272	1.29797	0.831562	1384.36
7.6-18C-R6	4.5	17.2	7.637	31.4	2143.1	7.72327	1201.57	1205.81	1997.16	59.0538	43.0087	26.7581	1.09353	0	0	17.6571	1.44407	0.924946	1229.19
7.6-18C-R6	5	17.4	7.653	31.4	2145.7	7.73773	1163.13	1167.22	1994.12	61.3667	41.3901	27.7148	1.15114	0	0	17.507	1.50098	0.961849	1190.14
7.6-18C-R6	5.5	17.4	7.653	31.4	2145.7	7.73773	1163.13	1167.22	1994.12	61.3667	41.3901	27.7148	1.15114	0	0	17.507	1.50098	0.961849	1190.14
7.6-18C-R6	6	17.4	7.653	31.4	2145.7	7.73773	1163.13	1167.22	1994.12	61.3667	41.3901	27.7148	1.15114	0	0	17.507	1.50098	0.961849	1190.14
7.6-18C-R6	6.5	17.4	7.653	31.4	2145.7	7.73773	1163.13	1167.22	1994.12	61.3667	41.3901	27.7148	1.15114	0	0	17.507	1.50098	0.961849	1190.14
8.0-18C-R1	0	16.4	8.021	31.8	2070	8.13056	406.264	407.71	1746.04	129.844	14.8555	61.6645	2.61919	0	0	12.0793	3.16412	2.02507	415.215
8.0-18C-R1	0.4	17.4	8.017	31.8	2013	8.1133	415.947	417.409	1698.43	125.505	14.769	60.8147	2.75619	0	0	12.0229	3.06166	1.96402	425.606
8.0-18C-R1	0.8	17.4	8.027	31.8	2035	8.12352	409.338	410.777	1711.24	129.462	14.5343	62.0248	2.82181	0	0	11.9162	3.1582	2.02595	418.844
8.0-18C-R1	1	17.5	8.05	31.8	2023	8.14561	383.71	385.058	1685.89	134.647	13.5848	64.8309	2.99599	0	0	11.5763	3.28506	2.10782	392.668
8.0-18C-R1	1.5	17.4	8.056	31.8	2085	8.15311	387.749	389.112	1735.28	140.537	13.7678	65.6381	3.02077	0	0	11.5898	3.42837	2.19926	396.753
8.0-18C-R1	2	17.3	8.07	31.8	2049	8.16862	365.016	366.301	1694.87	141.783	12.9984	67.4695	3.10246	0	0	11.3499	3.45838	2.21799	373.448
8.0-18C-R1	2.5	17.1	8.083	31.8	2085	8.18453	355.589	356.844	1716.64	147.974	12.737	69.262	3.16054	0	0	11.234	3.60858	2.31324	363.717
8.0-18C-R1	3	16.8	8.094	31.8	2089	8.1997	341.344	342.553	1712.31	151.324	12.335	70.8585	3.18504	0	0	11.1017	3.6891	2.36321	349.024
8.0-18C-R1	3.5	16.8	8.001	31.8	2067	8.10488	435.428	436.97	1755.84	124.735	15.7348	59.1361	2.56031	0	0	12.3546	3.04088	1.94797	445.225
8.0-18C-R1	4	16.9	8.034	31.8	2085	8.13727	403.32	404.747	1750.31	134.42	14.5317	63.0741	2.78374	0	0	11.9058	3.27733	2.09992	412.443
8.0-18C-R1	4.5	17.3	8.045	31.8	2074	8.14321	395.778	397.171	1733.28	136.757	14.0939	64.2881	2.92616	0	0	11.7268	3.33578	2.13936	404.921
8.0-18C-R1	5	17.2	8.068	31.8	2015	8.16786	359.273	360.54	1667.18	138.758	12.8314	67.2442	3.06913	0	0	11.3274	3.38422	2.16992	367.529
8.0-18C-R1	5.5	17.5	8.082	31.8	2015	8.17814	350.022	351.251	1657.48	142.673	12.3921	68.9525	3.229	0	0	11.1372	3.48089	2.23348	358.193
8.0-18C-R1	6	17.2	8.087	31.8	2080	8.18727	352.284	353.526	1709.48	148.783	12.5818	69.7507	3.20944	0	0	11.1727	3.62873	2.3267	360.379
8.0-18C-R1	6.5	17.2	8.087	31.8	2080	8.18727	352.284	353.526	1709.48	148.783	12.5818	69.7507	3.20944	0	0	11.1727	3.62873	2.3267	360.379
8.0-18C-R2	0	16.4	8.021	31.8	2050	8.13053	402.245	403.677	1728.64	128.542	14.7085	61.6609	2.61901	0	0	12.0482	3.13238	2.00476	411.108
8.0-18C-R2	0.4	17.1	8.017	31.8	2007	8.11721	409.586	411.031	1693.37	125.007	14.6711	60.9202	2.70668	0	0	12.0204	3.04849	1.9542	418.948
8.0-18C-R2	0.8	17.4	8.023	31.8	2049	8.11946	416.734	418.199	1725.95	129.36	14.7969	61.5419	2.79557	0	0	11.9946	3.15572	2.02436	426.411
8.0-18C-R2	1	17.5	8.038	31.8	2015	8.13339	394.878	396.264	1686.8	130.981	13.9801	63.3333	2.91284	0	0	11.7289	3.19562	2.05043	404.096
8.0-18C-R2	1.5	17.4	8.043	31.8	2069	8.13986	398.603	400.004	1730.24	135.918	14.1532	63.9998	2.92999	0	0	11.7448	3.3157	2.12698	407.859
8.0-18C-R2	2	17.2	8.052	31.8	2063	8.15164	384.572	385.928	1719.16	137.841	13.7349	65.205	2.95664	0	0	11.6161	3.36184	2.15557	393.409
8.0-18C-R2	2.5	17.1	8.07	31.8	2039	8.17124	360.184	361.456	1686.42	140.988	12.9016	67.5479	3.06529	0	0	11.3389	3.43822	2.20403	368.418
8.0-18C-R2	3	16.8	8.08	31.8	2117	8.18549	359.676	360.95	1746.22	149.355	12.9974	68.9949	3.08256	0	0	11.3246	3.64109	2.33246	367.769
8.0-18C-R2	3.5	16.7	8.002	31.8	2073	8.10721	433.747	435.286	1760.52	125.323	15.7204	59.2889	2.55085	0	0	12.352	3.05489	1.95649	443.456
8.0-18C-R2	4	16.7	8.02	31.8	2067	8.12559	411.853	413.313	1743.9	129.505	14.9268	61.4345	2.66109	0	0	12.0819	3.15683	2.02178	421.071
8.0-18C-R2	4.5	17.4	8.05	31.8	2051	8.14696	387.564	388.926	1710.06	136.547	13.7612	64.8737	2.9783	0	0	11.6212	3.33105	2.13683	396.564
8.0-18C-R2	5	17	8.061	31.8	2051	8.16342	369.889	371.196	1702.88	139.357	13.2881	66.4276	2.98341	0	0	11.4797	3.39807	2.17779	378.3
8.0-18C-R2	5.5	17.6	8.078	31.8	2057	8.17282	362.993	364.266	1696.01	144.691	12.814	68.393	3.21853	0	0	11.2499	3.53053	2.26586	371.512
8.0-18C-R2	6	17.2	8.08	31.8	2079	8.18015	358.968	360.233	1713.59	146.717	12.8205	68.8233	3.15726	0	0	11.2631	3.57832	2.29438	367.217
8.0-18C-R2	6.5	17.2	8.08	31.8	2079	8.18015	358.968	360.233	1713.59	146.717	12.8205	68.8233	3.15726	0	0	11.2631	3.57832	2.29438	367.217
8.0-18C-R3	0	16	7.981	29.2	2032	8.09566	450.746	452.359	1758.26	110.511	16.9222	50.5184	2.20548	0	0	13.347	2.73615	1.73614	460.484
8.0-18C-R3	0.4	17.3	7.99	29.2	2063	8.08784	471.461	473.121	1779.91	114.802	17.0314	51.0531	2.4372	0	0	13.2156	2.84769	1.81224	482.365
8.0-18C-R3	0.8	17.5	8.004	29.2	2066	8.09953	458.521	460.131	1774.31	118.354	16.4673	52.4426	2.5492	0	0	12.9981	2.93672	1.86977	469.238
8.0-18C-R3	1	17.4	8.016	29.2	2067.7	8.1131	442.519	444.074	1768.72	121.319	15.9391	53.7433	2.60655	0	0	12.8205	3.00981	1.91586	452.808
8.0-18C-R3	1.5	17.4	8.016	29.2	2067.7	8.1131	442.519	444.074	1768.72	121.319	15.9391	53.7433	2.60655	0	0	12.8205	3.00981	1.91586	452.808
8.0-18C-R3	2	17.4	8.043	29.2	2071.6	8.14065	412.221	413.67	1755.54	128.302	14.8478	56.688	2.77727	0	0	12.4222	3.18305	2.02613	421.805
8.0-18C-R3	2.5	17.4	8.056	29.2	2073.4	8.15391	398.308	399.708	1748.85	131.773	14.3467	58.15	2.86333	0	0	12.2346	3.26917	2.08095	407.569
8.0-18C-R3	3	17.3	8.057	29.2	2073.6	8.15625	395.624	397.017	1748.43	132.011	14.2918	58.2992	2.85301	0	0	12.2228	3.27458	2.08391	404.774
8.0-18C-R3	3.5	17.3	7.984	29.2	2063.1	8.0817	479.117	480.803	1783.44	113.415	17.3079	50.4409	2.403	0	0	13.3093	2.81329	1.79035	490.198
8.0-18C-R3	4	17.3	8	29.2	2065.4	8.09807	459.536	461.154	1776.24	117.295	16.6006	52.087	2.49528	0	0	13.0647	2.90953	1.8516	470.165
8.0-18C-R3	4.5	17.5	8.03	29.2	2069.7	8.12607	428.322	429.826	1761.91	124.934	15.3828	55.2214	2.70986	0	0	12.6099	3.09998	1.97372	438.334
8.0-18C-R3	5	17.4	8.035	29.2	2070.4	8.13249	420.984	422.464	1759.49	126.197	15.1634	55.8026	2.72558	0	0	12.539	3.13083	1.99289	430.772
8.0-18C-R3	5.5	17.4	8.031	29.2	2069.8	8.12841	425.429	426.925	1761.43	125.155	15.3236	55.364	2.70009	0	0	12.5978	3.10498	1.97644	435.32
8.0-18C-R3	6	17.3	8.024	29.2	2068.9	8.12259	431.559	433.078	1764.99	123.322	15.5899	54.6358	2.64021	0	0	12.7042	3.05903	1.94674	441.54
8.0-18C-R3	6.5	17.3	8.024	29.2	2066	8.12258	430.941	432.458	1762.45	123.143	15.5676	54.6355	2.64019	0	0	12.6997	3.0546	1.94392	440.908
8.0-18C-R4	0	16	7.981	29.2	2032	8.09566	450.746	452.359	1758.26	110.511	16.9222	50.5184	2.20548	0	0	13.347	2.73615	1.73614	460.484
8.0-18C-R4	0.4	17.3	7.999	29.2	2065.3	8.09704	460.748	462.37	1776.73	117.051	16.6443	51.9829	2.48941	0	0	13.0799	2.9035	1.84776	471.404
8.0-18C-R4	0.8	17.4	8.004	29.2	2066	8.10084	456.639	458.245	1774.36	118.319	16.4477	52.4738	2.534	0	0	13.0011	2.93538	1.86848	467.256
8.0-18C-R4	1	17.4	8.03	29.2	2069.7	8.12739	426.558	428.058	1761.96	124.898	15.3642	55.2547	2.69375	0	0	12.6126	3.09862	1.97239	436.476
8.0-18C-R4	1.5	17.4	8.03	29.2	2069.7	8.12739	426.558	428.058	1761.96	124.898	15.3642	55.2547	2.69375	0	0	12.6126	3.09862	1.97239	436.476
8.0-18C-R4	2	17.4	8.053	29.2	2073	8.15085	401.483	402.894	1750.42	130.967	14.461	57.8101	2.84324	0	0	12.2776	3.24916	2.06822	410.818
8.0-18C-R4	2.5	17.3	8.056	29.2	2073.4	8.15523	396.66	398.057	1748.9	131.737	14.3292	58.1854	2.84632	0	0	12.237	3.26778	2.07958	405.834
8.0-18C-R4	3	17.3	8.066	29.2	2074.9	8.16542	386.314	387.674	1743.73	134.466	13.9555	59.3307	2.91391	0	0	12.0947	3.33548	2.12267	395.249
8.0-18C-R4	3.5	17.4	7.993	29.2	2064.4	8.0896	469.938	471.59	1779.37	115.62	16.9267	51.3312	2.46924	0	0	13.1682	2.86843	1.82586	480.864
8.0-18C-R4	4	17.4	8.008	29.2	2066.6	8.10493	451.894	453.483	1772.53	119.314	16.2768	52.8944	2.55797	0	0	12.9407	2.96007	1.8842	462.401
8.0-18C-R4	4.5	17.5	8.039	29.2	2071	8.13525	418.307	419.775	1757.47	127.281	15.0231	56.2098	2.76775	0	0	12.4779	3.15822	2.0108	428.084
8.0-18C-R4	5	17.4	8.045	29.2	2071.9	8.14269	410.056	411.498	1754.54	128.832	14.7699	56.911	2.79035	0	0	12.3932	3.19622	2.03451	419.59
8.0-18C-R4	5.5	17.4	8.041	29.2	2071.3	8.13862	414.395	415.852	1756.53	127.773	14.9261	56.4657	2.76426	0	0	12.4513	3.16993	2.01778	424.03
8.0-18C-R4	6	17.4	8.037	29.2	2070.7	8.13453	418.777	420.25	1758.51	126.72	15.084	56.0229	2.73841	0	0	12.5097	3.14382	2.00116	428.514
8.0-18C-R4	6.5	17.4	8.037	29.2	2070.7	8.13453	418.777	420.25	1758.51	126.72	15.084	56.0229	2.73841	0	0	12.5097	3.14382	2.00116	428.514
8.0-18C-R5	0	15.8	8.043	31.4	2131.76	8.16122	386.391	387.778	1788.96	138.35	14.4159	63.4685	2.63886	0	0	11.972	3.37801	2.15679	394.644
8.0-18C-R5	0.4	17	8.04	31.4	2157.27	8.1423	414.543	416.008	1812.39	139.707	14.9252	62.6518	2.81836	0	0	12.0243	3.41552	2.18667	423.971
8.0-18C-R5	0.8	17.1	8.052	31.4	2159.12	8.15322	403.222	404.645	1805.69	143.209	14.4751	64.0954	2.91637	0	0	11.8553	3.50156	2.24227	412.441
8.0-18C-R5	1	17.3	8.05	31.4	2158.81	8.14854	408.744	410.183	1806.7	142.704	14.5878	63.7704	2.9378	0	0	11.8785	3.49002	2.23593	418.188
8.0-18C-R5	1.5	17.2	8.06	31.4	2160.35	8.16004	396.377	397.774	1801.12	145.595	14.1878	65.0586	2.98951	0	0	11.7436	3.56031	2.28043	405.487
8.0-18C-R5	2	16.7	8.089	31.4	2164.81	8.1962	359.267	360.541	1784.38	154.167	13.0498	68.9975	3.10508	0	0	11.366	3.76776	2.41052	367.31
8.0-18C-R5	2.5	17	8.095	31.4	2165.73	8.19832	357.984	359.249	1780.57	156.148	12.8889	69.6654	3.20634	0	0	11.2822	3.81747	2.44401	366.126
8.0-18C-R5	3	17.1	8.108	31.4	2167.73	8.2102	347.13	348.355	1772.48	160.287	12.4615	71.3631	3.3253	0	0	11.1136	3.9191	2.50965	355.066
8.0-18C-R5	3.5	17	8.039	31.4	2127.12	8.14124	409.724	411.172	1786.97	137.411	14.7518	62.5249	2.8115	0	0	11.9951	3.3594	2.15074	419.043
8.0-18C-R5	4	17.3	8.05	31.4	2128.81	8.1485	402.923	404.341	1780.82	140.648	14.38	63.7659	2.93755	0	0	11.8359	3.43973	2.20371	412.232
8.0-18C-R5	4.5	17.3	8.047	31.4	2128.35	8.14545	406.143	407.572	1782.46	139.791	14.4949	63.3948	2.91695	0	0	11.8772	3.41877	2.19028	415.526
8.0-18C-R5	5	17.5	8.071	31.4	2132.04	8.16724	384.202	385.551	1768.91	146.842	13.6321	66.3307	3.12293	0	0	11.5472	3.59207	2.30239	393.173
8.0-18C-R5	5.5	17.5	8.071	31.4	2132.04	8.16724	384.202	385.551	1768.91	146.842	13.6321	66.3307	3.12293	0	0	11.5472	3.59207	2.30239	393.173
8.0-18C-R5	6	17.5	8.071	31.4	2132.04	8.16724	384.202	385.551	1768.91	146.842	13.6321	66.3307	3.12293	0	0	11.5472	3.59207	2.30239	393.173
8.0-18C-R5	6.5	17.5	8.071	31.4	2132.04	8.16724	384.202	385.551	1768.91	146.842	13.6321	66.3307	3.12293	0	0	11.5472	3.59207	2.30239	393.173
8.0-18C-R6	0	15.8	8.043	31.4	2131.8	8.16122	386.398	387.785	1788.99	138.352	14.4162	63.4685	2.63886	0	0	11.972	3.37807	2.15683	394.651
8.0-18C-R6	0.4	17.1	8.036	31.4	2156.6	8.13691	420.686	422.171	1814.47	138.602	15.1021	62.1267	2.80889	0	0	12.078	3.3889	2.17013	430.304
8.0-18C-R6	0.8	17.5	8.055	31.4	2159.6	8.151	406.711	408.139	1803.8	144.241	14.4308	64.3156	3.00828	0	0	11.8053	3.52846	2.26161	416.207
8.0-18C-R6	1	17.2	8.049	31.4	2158.7	8.14884	408.145	409.583	1807.35	142.378	14.609	63.6846	2.91337	0	0	11.8946	3.48164	2.23004	417.525
8.0-18C-R6	1.5	17.1	8.062	31.4	2160.7	8.1634	392.647	394.033	1800.07	146.151	14.0955	65.35	2.98558	0	0	11.7185	3.57349	2.28834	401.624
8.0-18C-R6	2	16.8	8.085	31.4	2164.2	8.1908	364.661	365.953	1786.74	152.973	13.2067	68.4305	3.09468	0	0	11.4166	3.73901	2.39267	372.867
8.0-18C-R6	2.5	17	8.09	31.4	2165	8.19323	362.826	364.108	1783.64	154.596	13.0632	69.0043	3.169	0	0	11.3473	3.77953	2.41971	371.078
8.0-18C-R6	3	17	8.105	31.4	2167.3	8.20849	348.492	349.724	1774.43	159.296	12.5472	71.0018	3.28231	0	0	11.1536	3.89444	2.49328	356.418
8.0-18C-R6	3.5	17.3	8.042	31.4	2157.6	8.14039	417.512	418.982	1811.15	140.396	14.9007	62.7844	2.88318	0	0	11.9894	3.43357	2.19976	427.159
8.0-18C-R6	4	17.3	8.052	31.4	2159.1	8.15058	406.576	408.008	1805.57	143.285	14.5104	64.0187	2.95161	0	0	11.8509	3.50423	2.24503	415.97
8.0-18C-R6	4.5	17.2	8.05	31.4	2158.8	8.14986	407.052	408.487	1806.75	142.665	14.5699	63.8085	2.92021	0	0	11.8807	3.48865	2.23453	416.408
8.0-18C-R6	5	17.4	8.065	31.4	2161.1	8.16249	394.392	395.779	1798.13	147.153	14.0345	65.6116	3.06123	0	0	11.6715	3.59926	2.30645	403.553
8.0-18C-R6	5.5	17.4	8.065	31.4	2161.1	8.16249	394.392	395.779	1798.13	147.153	14.0345	65.6116	3.06123	0	0	11.6715	3.59926	2.30645	403.553
8.0-18C-R6	6	17.4	8.065	31.4	2161.1	8.16249	394.392	395.779	1798.13	147.153	14.0345	65.6116	3.06123	0	0	11.6715	3.59926	2.30645	403.553
8.0-18C-R6	6.5	17.4	8.065	31.4	2161.1	8.16249	394.392	395.779	1798.13	147.153	14.0345	65.6116	3.06123	0	0	11.6715	3.59926	2.30645	403.553
8.4-18C-R1	0	16.4	8.021	31.8	2050	8.13053	402.245	403.677	1728.64	128.542	14.7085	61.6609	2.61901	0	0	12.0482	3.13238	2.00476	411.108
8.4-18C-R1	0.4	17.3	8.443	31.8	2326	8.5468	141.028	141.525	1564.27	312.593	5.02211	129.134	7.41116	0	0	8.07653	7.6248	4.89007	144.286
8.4-18C-R1	0.8	17.4	8.508	31.8	2374	8.61122	118.077	118.492	1517.36	352.872	4.19255	142.222	8.6741	0	0	7.7643	8.60825	5.52209	120.819
8.4-18C-R1	1	17.5	8.5	31.8	2376	8.60173	121.739	122.166	1528.88	349.03	4.31	140.495	8.56369	0	0	7.80397	8.51551	5.46388	124.581
8.4-18C-R1	1.5	17.4	8.506	31.8	2364	8.60918	118.297	118.712	1513.09	350.236	4.20035	141.808	8.63362	0	0	7.76632	8.54395	5.48084	121.044
8.4-18C-R1	2	17.3	8.5	31.8	2394	8.60452	121.663	122.092	1541.31	351.788	4.33251	140.655	8.46468	0	0	7.81937	8.58083	5.50321	124.474
8.4-18C-R1	2.5	17.1	8.498	31.8	2478	8.60534	125.898	126.343	1601.63	363.815	4.50962	140.414	8.32862	0	0	7.8927	8.87222	5.68744	128.776
8.4-18C-R1	3	16.9	8.486	31.8	2460	8.59597	128.623	129.078	1605.03	354.43	4.63433	138.109	8.00438	0	0	7.94319	8.64147	5.53695	131.532
8.4-18C-R1	3.5	16.9	8.495	31.8	2308	8.60496	116.856	117.269	1488.68	335.611	4.21035	139.927	8.17176	0	0	7.78091	8.18265	5.24296	119.499
8.4-18C-R1	4	16.9	8.479	31.8	2410	8.58884	128.655	129.111	1579.31	343.074	4.63549	136.675	7.87412	0	0	7.94311	8.3646	5.35955	131.565
8.4-18C-R1	4.5	17.3	8.483	31.8	2338	8.58728	125.176	125.617	1524.07	334.312	4.45761	137.168	8.13514	0	0	7.86269	8.15457	5.22983	128.068
8.4-18C-R1	5	17.2	8.469	31.8	2312	8.57448	128.694	129.148	1523.13	323.321	4.59628	134.403	7.82774	0	0	7.9175	7.8856	5.05615	131.651
8.4-18C-R1	5.5	17.6	8.497	31.8	2308	8.59726	119.679	120.099	1485.93	336.866	4.22479	139.791	8.55274	0	0	7.76481	8.21969	5.27532	122.488
8.4-18C-R1	6	17.3	8.486	31.8	2349	8.59032	124.62	125.059	1527.98	337.526	4.4378	137.781	8.19237	0	0	7.85575	8.23297	5.28011	127.499
8.4-18C-R1	6.5	17.3	8.486	31.8	2349	8.59032	124.62	125.059	1527.98	337.526	4.4378	137.781	8.19237	0	0	7.85575	8.23297	5.28011	127.499
8.4-18C-R2	0	16.4	8.021	31.8	2050	8.13053	402.245	403.677	1728.64	128.542	14.7085	61.6609	2.61901	0	0	12.0482	3.13238	2.00476	411.108
8.4-18C-R2	0.4	17.1	8.456	31.8	2300	8.56269	132.709	133.178	1530.36	315.112	4.75358	131.865	7.54961	0	0	7.981	7.68451	4.92607	135.743
8.4-18C-R2	0.8	17.3	8.523	31.8	2456.8	8.62784	116.25	116.659	1553.96	374.24	4.13974	145.426	8.93158	0	0	7.75549	9.1285	5.85445	118.936
8.4-18C-R2	1	17.4	8.549	31.8	2320	8.65268	101.048	101.403	1428.63	365.523	3.5879	150.783	9.54317	0	0	7.54126	8.91688	5.72007	103.394
8.4-18C-R2	1.5	17.4	8.51	31.8	2338	8.61321	115.439	115.845	1490.3	348.178	4.09888	142.631	8.71411	0	0	7.7271	8.49373	5.44863	118.12
8.4-18C-R2	2	17.2	8.499	31.8	2451.9	8.60494	124.64	125.08	1582.36	360.305	4.45151	140.536	8.39661	0	0	7.86803	8.78761	5.63451	127.505
8.4-18C-R2	2.5	17.1	8.499	31.8	2464	8.60634	124.751	125.192	1590.7	362.167	4.46853	140.617	8.34785	0	0	7.87764	8.83203	5.66167	127.603
8.4-18C-R2	3	16.8	8.482	31.8	2484	8.59333	131.022	131.487	1626.94	355.902	4.73469	137.375	7.88405	0	0	7.9826	8.67645	5.55808	133.971
8.4-18C-R2	3.5	16.9	8.5	31.8	2346	8.61005	117.035	117.449	1508.56	344.106	4.21681	140.962	8.26819	0	0	7.7861	8.38976	5.37567	119.682
8.4-18C-R2	4	16.8	8.483	31.8	2298	8.59419	120.283	120.709	1496.52	328.017	4.3466	137.547	7.89957	0	0	7.83487	7.99664	5.1226	122.989
8.4-18C-R2	4.5	17.4	8.492	31.8	2366	8.59502	123.76	124.195	1532.17	343.272	4.39432	138.931	8.35658	0	0	7.83732	8.37407	5.37187	126.634
8.4-18C-R2	5	17.1	8.477	31.8	2340	8.58398	126.575	127.022	1532.96	331.504	4.53386	136.103	7.9289	0	0	7.89772	8.08428	5.18233	129.469
8.4-18C-R2	5.5	17.6	8.468	31.8	2338	8.56795	132.901	133.367	1542.41	326.85	4.69154	133.902	7.99457	0	0	7.94053	7.9753	5.11847	136.02
8.4-18C-R2	6	17.3	8.492	31.8	2350	8.5964	122.343	122.774	1521.18	340.755	4.35672	139.007	8.30772	0	0	7.82576	8.31173	5.33062	125.169
8.4-18C-R2	6.5	17.3	8.492	31.8	2350	8.5964	122.343	122.774	1521.18	340.755	4.35672	139.007	8.30772	0	0	7.82576	8.31173	5.33062	125.169
8.4-18C-R3	0	16	7.981	29.2	2032	8.09566	450.746	452.359	1758.26	110.511	16.9222	50.5184	2.20548	0	0	13.347	2.73615	1.73614	460.484
8.4-18C-R3	0.4	17.4	8.477	29.2	2309	8.58085	132.431	132.897	1554.06	312.957	4.77005	121.375	7.6527	0	0	8.17702	7.7642	4.94221	135.51
8.4-18C-R3	0.8	17.5	8.475	29.2	2308.6	8.57743	133.804	134.274	1556.1	311.953	4.80545	120.937	7.66129	0	0	8.1878	7.74048	4.92825	136.932
8.4-18C-R3	1	17.4	8.456	29.2	2305.1	8.5596	141.024	141.52	1575.88	302.198	5.07955	117.544	7.28731	0	0	8.3039	7.49728	4.7723	144.303
8.4-18C-R3	1.5	17.4	8.456	29.2	2305.1	8.5596	141.024	141.52	1575.88	302.198	5.07955	117.544	7.28731	0	0	8.3039	7.49728	4.7723	144.303
8.4-18C-R3	2	17.4	8.446	29.2	2303.3	8.54949	145.286	145.797	1586.12	297.16	5.23308	115.741	7.11951	0	0	8.36731	7.37227	4.69273	148.664
8.4-18C-R3	2.5	17.4	8.455	29.2	2304.9	8.55859	141.444	141.941	1576.89	301.689	5.09468	117.363	7.27035	0	0	8.31015	7.48465	4.76426	144.733
8.4-18C-R3	3	17.4	8.464	29.2	2306.6	8.5677	137.696	138.18	1567.63	306.273	4.95969	118.996	7.42439	0	0	8.2546	7.59837	4.83665	140.898
8.4-18C-R3	3.5	17.3	8.435	29.2	2301.2	8.53975	149.451	149.977	1597.21	291.624	5.39885	113.841	6.89926	0	0	8.4401	7.23384	4.60354	152.907
8.4-18C-R3	4	17.4	8.436	29.2	2301.4	8.53937	149.654	150.18	1596.18	292.158	5.39039	113.951	6.95557	0	0	8.43254	7.24818	4.61374	153.133
8.4-18C-R3	4.5	17.4	8.444	29.2	2302.9	8.54746	146.15	146.663	1588.13	296.153	5.26417	115.382	7.08642	0	0	8.38018	7.34729	4.67683	149.548
8.4-18C-R3	5	17.4	8.424	29.2	2299.2	8.52723	155.05	155.595	1608.15	286.234	5.58475	111.823	6.76383	0	0	8.51345	7.10123	4.5202	158.655
8.4-18C-R3	5.5	17.4	8.447	29.2	2303.4	8.5505	144.85	145.359	1585.05	297.65	5.21737	115.92	7.1361	0	0	8.36082	7.38444	4.70047	148.218
8.4-18C-R3	6	17.4	8.437	29.2	2301.6	8.54038	149.212	149.737	1595.19	292.657	5.37449	114.129	6.9718	0	0	8.42594	7.26058	4.62163	152.682
8.4-18C-R3	6.5	17.4	8.45	29.2	2304	8.55353	143.567	144.072	1582.02	299.166	5.17115	116.46	7.18615	0	0	8.3417	7.42205	4.72442	146.905
8.4-18C-R4	0	16	7.981	29.2	2032	8.09566	450.746	452.359	1758.26	110.511	16.9222	50.5184	2.20548	0	0	13.347	2.73615	1.73614	460.484
8.4-18C-R4	0.4	17.4	8.484	29.2	2310.3	8.58793	129.67	130.126	1546.68	316.592	4.67059	122.665	7.77854	0	0	8.13655	7.85437	4.9996	132.685
8.4-18C-R4	0.8	17.4	8.476	29.2	2308.8	8.57984	132.829	133.296	1555.1	312.438	4.78439	121.191	7.63489	0	0	8.18286	7.75132	4.93401	135.918
8.4-18C-R4	1	17.4	8.462	29.2	2306.2	8.56567	138.52	139.007	1569.68	305.248	4.98937	118.632	7.38988	0	0	8.26679	7.57293	4.82046	141.741
8.4-18C-R4	1.5	17.4	8.462	29.2	2306.2	8.56567	138.52	139.007	1569.68	305.248	4.98937	118.632	7.38988	0	0	8.26679	7.57293	4.82046	141.741
8.4-18C-R4	2	17.4	8.451	29.2	2304.2	8.55454	143.141	143.644	1581.01	299.673	5.15582	116.64	7.20292	0	0	8.33537	7.43461	4.73241	146.469
8.4-18C-R4	2.5	17.4	8.452	29.2	2304.4	8.55556	142.717	143.219	1580	300.179	5.14054	116.821	7.21971	0	0	8.32906	7.44719	4.74042	146.035
8.4-18C-R4	3	17.3	8.466	29.2	2307	8.57112	136.287	136.767	1565.62	307.266	4.92333	119.431	7.41599	0	0	8.24341	7.62185	4.85047	139.439
8.4-18C-R4	3.5	17.4	8.438	29.2	2301.8	8.54139	148.772	149.296	1594.19	293.157	5.35865	114.308	6.98805	0	0	8.41936	7.27296	4.62951	152.232
8.4-18C-R4	4	17.4	8.437	29.2	2301.6	8.54038	149.212	149.737	1595.19	292.657	5.37449	114.129	6.9718	0	0	8.42594	7.26058	4.62163	152.682
8.4-18C-R4	4.5	17.5	8.438	29.2	2301.8	8.54	149.414	149.939	1594.15	293.192	5.36606	114.24	7.02865	0	0	8.41842	7.27495	4.63186	152.906
8.4-18C-R4	5	17.4	8.423	29.2	2299.1	8.52622	155.513	156.059	1609.2	285.755	5.60142	111.646	6.7481	0	0	8.52038	7.08934	4.51263	159.128
8.4-18C-R4	5.5	17.4	8.463	29.2	2306.4	8.56669	138.108	138.593	1568.66	305.761	4.97451	118.814	7.40712	0	0	8.26069	7.58565	4.82855	141.319
8.4-18C-R4	6	17.4	8.453	29.2	2304.6	8.55657	142.294	142.794	1578.99	300.687	5.12529	117.001	7.23655	0	0	8.32276	7.45978	4.74843	145.602
8.4-18C-R4	6.5	17.3	8.467	29.2	2307.2	8.57213	135.881	136.359	1564.59	307.781	4.90863	119.614	7.4333	0	0	8.23738	7.63461	4.85859	139.023
8.4-18C-R5	0	15.8	8.043	31.4	2212.2	8.16134	401.306	402.746	1858.54	143.772	14.9723	63.4833	2.63961	0	0	12.0853	3.51038	2.24131	409.877
8.4-18C-R5	0.4	17.1	8.54	31.4	2438.7	8.648	109.088	109.473	1526.39	378.25	3.91611	146.703	9.11234	0	0	7.70749	9.24845	5.92238	111.582
8.4-18C-R5	0.8	17.2	8.488	31.4	2428.4	8.59397	128.62	129.073	1587.32	348.49	4.60379	135.989	8.11936	0	0	7.95038	8.52178	5.45831	131.576
8.4-18C-R5	1	17.1	8.461	31.4	2423	8.56803	138.996	139.487	1617.79	333.479	4.98978	130.676	7.57986	0	0	8.09676	8.15376	5.22138	142.174
8.4-18C-R5	1.5	17	8.448	31.4	2420.4	8.55627	143.92	144.429	1632.18	326.36	5.18171	128.19	7.31073	0	0	8.17245	7.97878	5.10814	147.193
8.4-18C-R5	2	17.3	8.406	31.4	2412.1	8.50962	165.207	165.789	1677.05	304.214	5.89612	119.877	6.74691	0	0	8.43327	7.43996	4.76651	169.024
8.4-18C-R5	2.5	17	8.47	31.4	2424.8	8.57853	134.684	135.16	1607.78	338.393	4.84917	132.537	7.69532	0	0	8.04765	8.27296	5.29648	137.747
8.4-18C-R5	3	17.4	8.449	31.4	2420.6	8.55173	145.981	146.494	1630.91	327.053	5.19478	128.091	7.50128	0	0	8.16309	7.99947	5.12616	149.372
8.4-18C-R5	3.5	17.5	8.48	31.4	2426.8	8.5817	133.508	133.977	1596.29	344.124	4.7371	134.153	8.11	0	0	7.9895	8.41803	5.39565	136.625
8.4-18C-R5	4	17.7	8.448	31.4	2420.4	8.54657	148.319	148.839	1631.87	326.622	5.23214	127.673	7.61579	0	0	8.16631	7.99186	5.12491	151.819
8.4-18C-R5	4.5	17.4	8.442	31.4	2419.3	8.54465	149.083	149.607	1638.62	323.287	5.30515	126.723	7.37999	0	0	8.20462	7.90737	5.06714	152.545
8.4-18C-R5	5	17.4	8.44	31.4	2418.9	8.54263	149.978	150.505	1640.8	322.212	5.337	126.334	7.34568	0	0	8.21663	7.88106	5.05028	153.461
8.4-18C-R5	5.5	17.4	8.44	31.4	2418.9	8.54263	149.978	150.505	1640.8	322.212	5.337	126.334	7.34568	0	0	8.21663	7.88106	5.05028	153.461
8.4-18C-R5	6	17.4	8.44	31.4	2418.9	8.54263	149.978	150.505	1640.8	322.212	5.337	126.334	7.34568	0	0	8.21663	7.88106	5.05028	153.461
8.4-18C-R5	6.5	17.4	8.44	31.4	2418.9	8.54263	149.978	150.505	1640.8	322.212	5.337	126.334	7.34568	0	0	8.21663	7.88106	5.05028	153.461
8.4-18C-R6	0	15.8	8.043	31.4	2131.8	8.16122	386.398	387.785	1788.99	138.352	14.4162	63.4685	2.63886	0	0	11.972	3.37807	2.15683	394.651
8.4-18C-R6	0.4	17	8.546	31.4	2439.9	8.65548	106.6	106.977	1519.21	381.734	3.83805	148.031	9.18702	0	0	7.68328	9.33256	5.97486	109.025
8.4-18C-R6	0.8	17.2	8.493	31.4	2429.4	8.59903	126.671	127.118	1581.59	351.302	4.53404	136.997	8.21451	0	0	7.92488	8.59054	5.50236	129.583
8.4-18C-R6	1	17	8.471	31.4	2425	8.57954	134.277	134.751	1606.66	338.945	4.83451	132.736	7.71326	0	0	8.0422	8.28647	5.30513	137.33
8.4-18C-R6	1.5	17	8.482	31.4	2427.2	8.59068	129.866	130.325	1594.24	345.059	4.6757	134.936	7.91357	0	0	7.98332	8.43592	5.40081	132.819
8.4-18C-R6	2	17.1	8.408	31.4	2412.5	8.51441	162.831	163.406	1675.06	305.175	5.84541	120.397	6.69939	0	0	8.42175	7.46172	4.77822	166.554
8.4-18C-R6	2.5	17	8.4512	31.4	2421.1	8.5595	142.547	143.051	1628.71	328.103	5.13229	128.818	7.36545	0	0	8.15379	8.0214	5.13543	145.789
8.4-18C-R6	3	17.1	8.448	31.4	2420.5	8.55488	144.548	145.058	1632.21	326.412	5.18908	128.116	7.35371	0	0	8.17166	7.98098	5.11074	147.853
8.4-18C-R6	3.5	17.3	8.483	31.4	2427.4	8.58752	131.159	131.621	1592.97	345.726	4.68098	134.907	8.07228	0	0	7.97546	8.45519	5.41693	134.19
8.4-18C-R6	4	17.5	8.445	31.4	2419.9	8.5463	148.386	148.907	1635.31	324.941	5.265	127.235	7.4752	0	0	8.18586	7.94878	5.09487	151.851
8.4-18C-R6	4.5	17.3	8.451	31.4	2421.1	8.55514	144.491	144.999	1628.83	328.114	5.15676	128.557	7.49243	0	0	8.15237	8.02447	5.14098	147.829
8.4-18C-R6	5	17.4	8.458	31.4	2422.4	8.56084	142.084	142.583	1620.99	331.949	5.05609	129.859	7.66017	0	0	8.11113	8.11922	5.2029	145.384
8.4-18C-R6	5.5	17.4	8.458	31.4	2422.4	8.56084	142.084	142.583	1620.99	331.949	5.05609	129.859	7.66017	0	0	8.11113	8.11922	5.2029	145.384
8.4-18C-R6	6	17.4	8.458	31.4	2422.4	8.56084	142.084	142.583	1620.99	331.949	5.05609	129.859	7.66017	0	0	8.11113	8.11922	5.2029	145.384
8.4-18C-R6	6.5	17.4	8.458	31.4	2422.4	8.56084	142.084	142.583	1620.99	331.949	5.05609	129.859	7.66017	0	0	8.11113	8.11922	5.2029	145.384
Diet 1/6
code	day	temp	pH	salinity	TA	pH out	fCO2 out (matm)	pCO2 out (matm)	HCO3 out (mmol/kgSW)	CO3 out (mmol/kgSW)	CO2 out (mmol/kgSW)	B Alk out (mmol/kgSW)	OH out (mmol/kgSW)	P Alk out (mmol/kgSW)	Si Alk out (mmol/kgSW)	Revelle out	WCa out	WAr out	xCO2 out (dry at 1 atm) (ppm)
7.6-15C-R1	0	16.2	8.03	30.5	2143.7	8.14296	413.864	415.341	1815.84	133.032	15.3339	59.2245	2.57549	0	0	12.4011	3.26808	2.08316	422.894
7.6-15C-R1	0.4	14.5	7.623	30.5	2140.4	7.73997	1133.41	1137.54	2004.89	54.8137	44.2093	25.0337	0.870854	0	0	18.2457	1.34411	0.853621	1156.05
7.6-15C-R1	0.8	13.8	7.664	30.5	2147.1	7.79213	993.773	997.43	1998.35	60.1451	39.61	27.5535	0.920048	0	0	17.977	1.4739	0.934693	1012.93
7.6-15C-R1	1	14.2	7.624	30.5	2140.7	7.74459	1117.63	1121.72	2005.07	54.8385	43.9984	25.1153	0.855978	0	0	18.2682	1.34434	0.853232	1139.62
7.6-15C-R1	1.5	13.9	7.641	30.5	2140.7	7.76635	1056.59	1060.47	1999.87	56.9167	41.9831	26.1375	0.875145	0	0	18.1667	1.39491	0.88478	1077.06
7.6-15C-R1	2	14.2	7.666	30.5	2126.7	7.78941	994.518	998.159	1978.16	59.9841	39.1517	27.6373	0.949033	0	0	17.8873	1.47048	0.933293	1014.08
7.6-15C-R1	2.5	13.9	7.666	30.5	2126.7	7.79305	982.901	986.514	1978.37	59.8749	39.0552	27.6683	0.930637	0	0	17.9137	1.4674	0.930766	1001.94
7.6-15C-R1	3	14.4	7.671	30.5	2107.3	7.7923	980.125	983.704	1958.05	60.1827	38.3481	27.9307	0.97331	0	0	17.7858	1.47563	0.936948	999.606
7.6-15C-R1	3.5	14.3	7.656	30.5	2107.3	7.77755	1015.46	1019.17	1963.13	58.1235	39.8531	27.0077	0.932092	0	0	17.9416	1.425	0.904616	1035.54
7.6-15C-R1	4	14.4	7.66	30.5	2101.4	7.7806	1005.93	1009.61	1956.17	58.5265	39.3578	27.2439	0.947431	0	0	17.8847	1.43502	0.911163	1025.93
7.6-15C-R1	4.5	14.3	7.712	30.5	2106.7	7.83705	876.395	879.599	1943.06	65.9762	34.3953	30.6378	1.06895	0	0	17.3232	1.61752	1.02683	893.725
7.6-15C-R1	5	14.3	7.718	30.5	2089.5	7.84339	855.541	858.67	1924.75	66.3167	33.5769	31.0502	1.08469	0	0	17.2162	1.62587	1.03213	872.459
7.6-15C-R1	5.5	14.5	7.759	30.5	2089.6	7.88419	774.224	777.047	1908.94	72.7465	30.1991	33.9691	1.21386	0	0	16.6405	1.78385	1.13289	789.691
7.6-15C-R1	6	14.5	7.654	30.5	2099.4	7.77301	1024.86	1028.59	1956.19	57.7104	39.9752	26.866	0.939701	0	0	17.9285	1.41514	0.898733	1045.33
7.6-15C-R1	6.5	14.7	7.667	30.5	2099.4	7.78443	998.299	1001.93	1951.75	59.5188	38.7014	27.6484	0.98278	0	0	17.7862	1.45977	0.927465	1018.45
7.6-15C-R1	7	14.7	7.672	30.5	2130.7	7.78974	1000.2	1003.84	1979.54	61.1093	38.7752	27.9624	0.994877	0	0	17.7893	1.49878	0.952251	1020.39
7.6-15C-R2	0	16.2	8.03	30.5	2143.7	8.14296	413.864	415.341	1815.84	133.032	15.3339	59.2245	2.57549	0	0	12.4011	3.26808	2.08316	422.894
7.6-15C-R2	0.4	14.5	7.595	30.5	2143.7	7.71005	1221.27	1225.72	2016.51	51.4617	47.6364	23.4754	0.812889	0	0	18.4119	1.26192	0.801421	1245.67
7.6-15C-R2	0.8	13.9	7.647	30.5	2143.7	7.77276	1041.56	1045.38	2000.75	57.789	41.3859	26.498	0.888166	0	0	18.1206	1.41628	0.89834	1061.74
7.6-15C-R2	1	14.1	7.621	30.5	2142.6	7.74257	1123.12	1127.24	2007.88	54.4729	44.3512	24.9512	0.844108	0	0	18.3015	1.33525	0.847291	1145.1
7.6-15C-R2	1.5	14	7.646	30.5	2142.6	7.77049	1047.82	1051.67	1999.97	57.663	41.506	26.4284	0.891812	0	0	18.1182	1.41332	0.896645	1068.23
7.6-15C-R2	2	14.3	7.643	30.5	2130.5	7.76369	1062.36	1066.24	1989.3	57.0485	41.6938	26.2209	0.902819	0	0	18.0959	1.39865	0.887884	1083.37
7.6-15C-R2	2.5	13.9	7.647	30.5	2130.5	7.77276	1035.06	1038.86	1988.27	57.4285	41.1278	26.498	0.888165	0	0	18.0986	1.40745	0.892736	1055.11
7.6-15C-R2	3	14.1	7.635	30.5	2105	7.75754	1063.43	1067.33	1967.86	55.2599	41.9943	25.7642	0.873717	0	0	18.137	1.35454	0.859532	1084.25
7.6-15C-R2	3.5	14.5	7.635	30.5	2105	7.75277	1080	1083.94	1967.58	55.4035	42.1262	25.7296	0.896913	0	0	18.0995	1.35857	0.862806	1101.58
7.6-15C-R2	4	14.1	7.634	30.5	2110.1	7.75647	1068.84	1072.76	1973	55.2682	42.2078	25.7053	0.871569	0	0	18.1534	1.35475	0.859661	1089.76
7.6-15C-R2	4.5	14.2	7.715	30.5	2111.7	7.84146	868.146	871.325	1946.69	66.5469	34.1768	30.8569	1.06988	0	0	17.302	1.63136	1.0354	885.226
7.6-15C-R2	5	14.2	7.678	30.5	2099.7	7.80218	951.29	954.773	1948.64	60.8519	37.45	28.3973	0.97735	0	0	17.7163	1.49175	0.946795	970.005
7.6-15C-R2	5.5	14.6	7.631	30.5	2099.8	7.74732	1092.83	1096.81	1963.85	54.7956	42.4959	25.4875	0.893976	0	0	18.112	1.3438	0.853601	1114.77
7.6-15C-R2	6	14.5	7.645	30.5	2109.7	7.76343	1054.5	1058.34	1968.84	56.8161	41.1315	26.3223	0.919193	0	0	18.0256	1.39321	0.884805	1075.57
7.6-15C-R2	6.5	14.3	7.671	30.5	2109.7	7.79352	977.425	980.999	1960.38	60.216	38.3604	27.9412	0.967005	0	0	17.7987	1.4763	0.937183	996.753
7.6-15C-R2	7	14.1	7.654	30.5	2110.7	7.77782	1014.53	1018.25	1967.14	57.8808	40.0632	26.9046	0.915492	0	0	17.984	1.41879	0.900298	1034.39
7.6-15C-R3	0	16.2	8.03	30.5	2143.7	8.14296	413.864	415.341	1815.84	133.032	15.3339	59.2245	2.57549	0	0	12.4011	3.26808	2.08316	422.894
7.6-15C-R3	0.4	14.5	7.607	30.5	2143.7	7.72288	1183.62	1187.94	2012.93	52.9103	46.1679	24.1323	0.837256	0	0	18.3506	1.29744	0.82398	1207.26
7.6-15C-R3	0.8	13.8	7.65	30.5	2143.7	7.77718	1029.36	1033.15	1999.83	58.152	41.0284	26.6894	0.888899	0	0	18.1032	1.42505	0.903718	1049.2
7.6-15C-R3	1	14	7.615	30.5	2135.6	7.73733	1132.76	1136.91	2003.16	53.5094	44.8704	24.6177	0.826257	0	0	18.3392	1.31152	0.832058	1154.82
7.6-15C-R3	1.5	13.9	7.591	30.5	2135.6	7.71278	1201.58	1205.99	2010.39	50.5768	47.7442	23.2996	0.773594	0	0	18.4776	1.23953	0.786225	1224.86
7.6-15C-R3	2	14.3	7.595	30.5	2133.3	7.71239	1206.05	1210.46	2006.75	51.1375	47.3331	23.489	0.802235	0	0	18.4159	1.25373	0.795888	1229.9
7.6-15C-R3	2.5	14	7.61	30.5	2133.3	7.73198	1146.43	1150.64	2002.49	52.8363	45.412	24.3363	0.816133	0	0	18.3662	1.29502	0.821591	1168.75
7.6-15C-R3	3	14.2	7.632	30.5	2105.6	7.75314	1076.29	1080.23	1969.3	54.9315	42.3709	25.5796	0.873002	0	0	18.152	1.34662	0.854679	1097.46
7.6-15C-R3	3.5	14.3	7.581	30.5	2105.6	7.69741	1234.47	1238.99	1984.4	48.8531	48.4485	22.7425	0.775032	0	0	18.4302	1.19772	0.760334	1258.88
7.6-15C-R3	4	14	7.58	30.5	2114.7	7.69982	1229.05	1233.56	1993.56	48.846	48.6846	22.7081	0.757877	0	0	18.4782	1.19722	0.759542	1252.98
7.6-15C-R3	4.5	14.2	7.686	30.5	2107.9	7.81068	935.201	938.625	1953.58	62.2131	36.8166	28.9143	0.996684	0	0	17.6428	1.52512	0.967973	953.6
7.6-15C-R3	5	14.2	7.676	30.5	2097.3	7.80005	955.191	958.688	1947.06	60.5055	37.6035	28.2693	0.972572	0	0	17.7334	1.48326	0.941405	973.983
7.6-15C-R3	5.5	14.7	7.639	30.5	2097.4	7.75466	1073.11	1077.01	1958.99	55.7813	41.6014	25.9477	0.917663	0	0	18.0361	1.36811	0.869226	1094.77
7.6-15C-R3	6	14.5	7.635	30.5	2109.7	7.75277	1082.45	1086.39	1972.03	55.5287	42.2216	25.7296	0.896911	0	0	18.1074	1.36164	0.864756	1104.07
7.6-15C-R3	6.5	14.5	7.631	30.5	2109.7	7.74851	1093.83	1097.82	1973.29	55.0211	42.6655	25.4958	0.888146	0	0	18.138	1.3492	0.856851	1115.68
7.6-15C-R3	7	14.6	7.635	30.5	2111.2	7.75158	1087.41	1091.37	1973.38	55.6047	42.2853	25.721	0.902792	0	0	18.1004	1.36364	0.866206	1109.25
7.6-15C-R4	0	16.5	8.005	28.9	2030.6	8.11376	432.789	434.328	1745.51	115.313	16.0342	52.0845	2.39063	0	0	13.0424	2.86235	1.81638	442.388
7.6-15C-R4	0.4	14.2	7.603	28.9	2071.7	7.72195	1162.28	1166.54	1952.13	48.3674	46.1696	22.0739	0.785181	0	0	18.6727	1.19699	0.755825	1185.17
7.6-15C-R4	0.8	13.9	7.641	28.9	2086.1	7.76622	1047.59	1051.44	1954.99	53.0834	42.0022	24.1133	0.845505	0	0	18.5065	1.31325	0.828728	1067.9
7.6-15C-R4	1	14.3	7.651	28.9	2084.8	7.77211	1035.8	1039.59	1950.43	54.429	41.0183	24.6374	0.889527	0	0	18.389	1.34716	0.850822	1056.29
7.6-15C-R4	1.5	13.7	7.636	28.9	2084.8	7.76326	1052.54	1056.42	1955.4	52.3705	42.4645	23.8542	0.824251	0	0	18.5594	1.29533	0.817086	1072.74
7.6-15C-R4	2	14.5	7.624	28.9	2037.9	7.7409	1094.59	1098.58	1913.83	50.0476	43.0803	23.1466	0.843337	0	0	18.4795	1.23901	0.782844	1116.47
7.6-15C-R4	2.5	14	7.615	28.9	2037.1	7.73718	1098.92	1102.96	1915.96	48.8272	43.9239	22.7075	0.798219	0	0	18.579	1.20809	0.762523	1120.34
7.6-15C-R4	3	14.2	7.619	28.9	2036.4	7.7391	1095.48	1099.49	1914.03	49.3335	43.5161	22.9036	0.816803	0	0	18.5359	1.2209	0.770921	1117.05
7.6-15C-R4	3.5	14	7.59	28.9	2024.8	7.71037	1165.92	1170.2	1911.06	45.7866	46.6018	21.4329	0.750428	0	0	18.6656	1.13286	0.715037	1188.64
7.6-15C-R4	4	13.9	7.602	28.9	2028.8	7.72442	1127.9	1132.04	1911.72	47.1452	45.2221	22.0427	0.76792	0	0	18.6375	1.16635	0.736021	1149.76
7.6-15C-R4	4.5	13.8	7.63	28.9	2031.4	7.75564	1045.53	1049.38	1906.39	50.3437	42.0505	23.5202	0.817502	0	0	18.4995	1.24534	0.785708	1065.7
7.6-15C-R4	5	14.1	7.62	28.9	2040.8	7.74135	1090.82	1094.82	1918	49.5218	43.4652	22.9634	0.813457	0	0	18.5476	1.22542	0.773615	1112.19
7.6-15C-R4	5.5	14.2	7.623	28.9	2038.2	7.74338	1085.06	1089.04	1914.6	49.8371	43.1022	23.1152	0.824893	0	0	18.5158	1.23336	0.778791	1106.43
7.6-15C-R4	6	14.6	7.618	28.9	2039.5	7.73331	1117	1121.07	1917	49.4316	43.8274	22.823	0.836436	0	0	18.5066	1.22391	0.773464	1139.45
7.6-15C-R4	6.5	14.2	7.638	28.9	2039.6	7.75943	1044.06	1047.88	1911.58	51.6308	41.4733	23.9245	0.855936	0	0	18.4199	1.27775	0.80682	1064.61
7.6-15C-R5	0	16.5	8.005	28.9	2030.6	8.11376	432.789	434.328	1745.51	115.313	16.0342	52.0845	2.39063	0	0	13.0424	2.86235	1.81638	442.388
7.6-15C-R5	0.4	14.4	7.635	28.9	2045	7.75384	1063.26	1067.15	1917.45	51.4805	41.9764	23.745	0.860817	0	0	18.4307	1.27433	0.804994	1084.41
7.6-15C-R5	0.8	13.9	7.606	28.9	2048	7.72871	1126.86	1131.01	1928.91	48.0411	45.1808	22.2472	0.775537	0	0	18.6516	1.18851	0.750008	1148.71
7.6-15C-R5	1	14.5	7.634	28.9	2044.7	7.75158	1069.99	1073.9	1917.39	51.3886	42.1122	23.6829	0.864327	0	0	18.4272	1.27221	0.80382	1091.39
7.6-15C-R5	1.5	13.8	7.595	28.9	2044.7	7.71807	1153.43	1157.68	1928.84	46.7154	46.3901	21.6943	0.749755	0	0	18.7014	1.15559	0.729083	1175.68
7.6-15C-R5	2	14.6	7.59	28.9	2030.6	7.70339	1196.18	1200.54	1916.2	46.121	46.9343	21.3981	0.780742	0	0	18.6132	1.14194	0.721662	1220.22
7.6-15C-R5	2.5	14.2	7.566	28.9	2030.7	7.68229	1254.29	1258.88	1922.78	43.4821	49.8244	20.261	0.716647	0	0	18.7054	1.07609	0.679483	1278.98
7.6-15C-R5	3	14.2	7.553	28.9	2082.4	7.66831	1330.89	1335.76	1975.55	43.2598	52.8671	19.6557	0.693938	0	0	18.7873	1.07059	0.67601	1357.09
7.6-15C-R5	3.5	14.1	7.664	28.9	2027.3	7.7884	965.632	969.172	1892.13	54.4431	38.4769	25.3963	0.906524	0	0	18.1963	1.3472	0.850496	984.546
7.6-15C-R5	4	14.1	7.612	28.9	2031.3	7.73279	1108.62	1112.68	1911.21	48.3826	44.1743	22.5443	0.797567	0	0	18.5748	1.19723	0.75582	1130.33
7.6-15C-R5	4.5	13.8	7.616	28.9	2040.7	7.74062	1089.61	1093.62	1919.23	48.9602	43.8232	22.7738	0.789716	0	0	18.5996	1.21111	0.764116	1110.63
7.6-15C-R5	5	14.2	7.593	28.9	2032.9	7.71125	1170.38	1174.66	1917.86	46.3616	46.491	21.5703	0.766065	0	0	18.6483	1.14735	0.72448	1193.42
7.6-15C-R5	5.5	14.4	7.692	28.9	2039.5	7.81457	913.428	916.764	1894.5	58.4992	36.061	27.0285	0.990029	0	0	17.9119	1.44807	0.914744	931.597
7.6-15C-R5	6	14.9	7.627	28.9	2050.5	7.73938	1109.71	1113.73	1924.67	50.8486	43.1431	23.2769	0.87204	0	0	18.4426	1.25945	0.796431	1132.35
7.6-15C-R5	6.5	14.6	7.627	28.9	2050.6	7.74292	1097.11	1101.1	1924.97	50.7475	43.0468	23.2989	0.855146	0	0	18.4727	1.25649	0.794053	1119.15
7.6-15C-R6	0	16	8.045	29.1	2051.9	8.16131	383.546	384.919	1738.74	126.745	14.4074	57.1154	2.55976	0	0	12.4252	3.14002	1.99173	391.833
7.6-15C-R6	0.4	14.3	7.605	29.1	2058.7	7.72296	1150.68	1154.89	1938.34	48.5888	45.5165	22.4002	0.797796	0	0	18.5846	1.2012	0.759157	1173.45
7.6-15C-R6	0.8	14.3	7.581	29.1	2058.3	7.69724	1224.73	1229.21	1944.5	45.941	48.4458	21.1915	0.751935	0	0	18.6686	1.13574	0.717788	1248.97
7.6-15C-R6	1	13.9	7.609	29.1	2065.8	7.73195	1125.35	1129.49	1944.25	49.0749	45.0694	22.6345	0.784748	0	0	18.6176	1.21267	0.765781	1147.17
7.6-15C-R6	1.5	13.9	7.604	29.1	2064.5	7.72658	1139.44	1143.63	1944.42	48.4765	45.6336	22.3745	0.775112	0	0	18.6391	1.19789	0.756443	1161.53
7.6-15C-R6	2	14.2	7.618	29.1	2068.2	7.73805	1113.21	1117.28	1943.76	50.2742	44.1705	23.0877	0.818374	0	0	18.544	1.24272	0.785239	1135.12
7.6-15C-R6	2.5	13.9	7.612	29.1	2066.6	7.73517	1117	1121.1	1944.16	49.4376	44.7347	22.7917	0.790583	0	0	18.6038	1.22164	0.77144	1138.65
7.6-15C-R6	3	14.1	7.619	29.1	2068.5	7.7403	1106.21	1110.27	1943.83	50.3636	44.0289	23.148	0.815021	0	0	18.5488	1.24479	0.786385	1127.88
7.6-15C-R6	3.5	13.8	7.667	29.1	2081.3	7.79526	970.227	973.797	1941.55	56.5025	38.9777	25.8629	0.899486	0	0	18.2342	1.39606	0.881409	988.94
7.6-15C-R6	4	14	7.623	29.1	2069.5	7.74577	1091.03	1095.04	1943.69	50.8226	43.5595	23.3693	0.817709	0	0	18.5368	1.256	0.793302	1112.29
7.6-15C-R6	4.5	14.1	7.637	29.1	2073.3	7.75957	1057.81	1061.69	1943.09	52.6279	42.1023	24.1247	0.85199	0	0	18.4408	1.30076	0.82174	1078.53
7.6-15C-R6	5	14.2	7.646	29.1	2075.7	7.76799	1038.4	1042.2	1942.56	53.8294	41.2023	24.6183	0.876788	0	0	18.3679	1.3306	0.840768	1058.84
7.6-15C-R6	5.5	13.7	7.588	29.1	2060.2	7.71175	1176.59	1180.93	1944.84	46.5355	47.4158	21.5727	0.735232	0	0	18.7139	1.14968	0.725704	1199.17
7.6-15C-R6	6	13.9	7.627	29.1	2070.6	7.75125	1076.09	1080.05	1943.63	51.2885	43.0967	23.5928	0.820407	0	0	18.5235	1.26737	0.800323	1096.96
7.6-15C-R6	6.5	14.1	7.629	29.1	2071.1	7.75101	1079.03	1082.98	1943.38	51.6087	42.9468	23.6862	0.835363	0	0	18.4918	1.27557	0.805826	1100.16
8.0-15C-R1	0	16.2	8.03	30.5	2143.7	8.14296	413.864	415.341	1815.84	133.032	15.3339	59.2245	2.57549	0	0	12.4011	3.26808	2.08316	422.894
8.0-15C-R1	0.4	14.5	8.037	30.5	2126	8.17283	374.921	376.288	1796.8	133.093	14.624	60.6587	2.35941	0	0	12.3123	3.26364	2.07268	382.411
8.0-15C-R1	0.8	13.8	8.05	30.5	2123	8.19562	350.754	352.045	1785.97	136.11	13.9804	62.4871	2.32968	0	0	12.1325	3.33546	2.11523	357.515
8.0-15C-R1	1	14	8.05	30.5	2129.4	8.19292	354.835	356.138	1791.4	136.615	14.0556	62.4133	2.35887	0	0	12.1376	3.34843	2.12433	361.745
8.0-15C-R1	1.5	13.7	8.066	30.5	2129.4	8.21341	335.297	336.532	1780.7	140.896	13.406	64.5062	2.4045	0	0	11.9129	3.45244	2.18897	341.727
8.0-15C-R1	2	14.1	8.058	30.5	2131.3	8.19977	348.94	350.22	1787.59	138.969	13.7794	63.3575	2.41882	0	0	12.0222	3.40644	2.16157	355.77
8.0-15C-R1	2.5	13.8	8.07	30.5	2131.3	8.21615	333.351	334.578	1779.53	142.184	13.2868	64.9695	2.44246	0	0	11.8567	3.48431	2.20963	339.777
8.0-15C-R1	3	14.1	8.068	30.5	2104.2	8.20997	335.088	336.316	1757.4	139.867	13.2324	64.5941	2.47628	0	0	11.8402	3.42846	2.17554	341.647
8.0-15C-R1	3.5	14.2	8.087	30.5	2104.2	8.22807	319.366	320.535	1744.19	145.22	12.5726	66.9656	2.60578	0	0	11.5728	3.56	2.25948	325.649
8.0-15C-R1	4	14	8.091	30.5	2131	8.23494	317.259	318.423	1764.39	148.222	12.5672	67.5705	2.59848	0	0	11.5592	3.63294	2.30482	323.437
8.0-15C-R1	4.5	14.1	8.127	30.5	2122.6	8.27036	287.18	288.232	1730.84	158.305	11.3405	72.3073	2.84571	0	0	11.0658	3.8804	2.46233	292.801
8.0-15C-R1	5	14.3	8.118	30.5	2101	8.25839	293.891	294.965	1719.16	154.015	11.5341	70.9974	2.82035	0	0	11.1504	3.77595	2.39704	299.702
8.0-15C-R1	5.5	14.5	8.092	30.5	2101.1	8.2291	318.552	319.713	1737.86	146.536	12.4253	67.4872	2.68582	0	0	11.4944	3.59328	2.28203	324.916
8.0-15C-R1	6	14.4	8.094	30.5	2107.8	8.23252	316.483	317.639	1742.22	147.558	12.3826	67.789	2.68202	0	0	11.4785	3.61798	2.29724	322.774
8.0-15C-R1	6.5	14.4	8.089	30.5	2107.8	8.2274	320.882	322.054	1745.76	146.127	12.5547	67.1426	2.65063	0	0	11.5468	3.5829	2.27496	327.26
8.0-15C-R1	7	14.5	8.082	30.5	2100.9	8.21887	327.426	328.62	1744.7	143.689	12.7715	66.2035	2.62331	0	0	11.6315	3.52346	2.23769	333.968
8.0-15C-R2	0	16.2	8.03	30.5	2143.7	8.14296	413.864	415.341	1815.84	133.032	15.3339	59.2245	2.57549	0	0	12.4011	3.26808	2.08316	422.894
8.0-15C-R2	0.4	14.5	8.062	30.5	2114	8.19843	348.13	349.4	1769.72	139.047	13.579	63.6944	2.50267	0	0	11.9316	3.40963	2.16539	355.085
8.0-15C-R2	0.8	13.9	8.068	30.5	2113.7	8.2127	333.782	335.009	1765.7	140.446	13.2627	64.6746	2.44589	0	0	11.8579	3.44203	2.18326	340.249
8.0-15C-R2	1	14.1	8.066	30.5	2115.8	8.20794	338.831	340.073	1768.76	140.116	13.3802	64.3469	2.46475	0	0	11.8853	3.43456	2.17942	345.463
8.0-15C-R2	1.5	13.8	8.076	30.5	2115.8	8.22227	325.458	326.656	1762.04	142.784	12.9722	65.724	2.47711	0	0	11.7499	3.49901	2.21895	331.731
8.0-15C-R2	2	13.9	8.071	30.5	2128.5	8.21581	333.407	334.633	1776.37	142.309	13.2478	65.0554	2.46344	0	0	11.8365	3.48769	2.21222	339.867
8.0-15C-R2	2.5	13.8	8.083	30.5	2128.5	8.22947	321.199	322.381	1768.04	145.664	12.8024	66.6204	2.51851	0	0	11.67	3.5696	2.26371	327.39
8.0-15C-R2	3	13.8	8.077	30.5	2120.3	8.2233	325.269	326.466	1765.21	143.381	12.9646	65.8521	2.48301	0	0	11.7423	3.51366	2.22824	331.538
8.0-15C-R2	3.5	14.1	8.089	30.5	2120.3	8.23151	318.733	319.902	1756.61	146.912	12.5866	67.2682	2.60217	0	0	11.5699	3.60113	2.28512	324.972
8.0-15C-R2	4	13.8	8.093	30.5	2119.4	8.23969	311.087	312.232	1753.16	147.878	12.3994	67.9095	2.57849	0	0	11.5192	3.62386	2.29812	317.084
8.0-15C-R2	4.5	14.1	8.126	30.5	2115.1	8.26932	286.937	287.989	1725.26	157.418	11.331	72.1693	2.83893	0	0	11.0687	3.85867	2.44854	292.554
8.0-15C-R2	5	14.3	8.118	30.5	2097.6	8.25838	293.403	294.476	1716.28	153.755	11.515	70.9965	2.8203	0	0	11.1457	3.76957	2.39299	299.205
8.0-15C-R2	5.5	14.6	8.093	30.5	2097.7	8.22876	318.496	319.656	1734.2	146.613	12.3851	67.5748	2.70872	0	0	11.4742	3.59552	2.28393	324.892
8.0-15C-R2	6	14.5	8.095	30.5	2101	8.23217	315.908	317.06	1735.65	147.387	12.3222	67.8759	2.70485	0	0	11.4535	3.61415	2.29528	322.219
8.0-15C-R2	6.5	14.5	8.086	30.5	2101	8.22296	323.852	325.033	1741.99	144.824	12.6321	66.7149	2.64814	0	0	11.5765	3.5513	2.25537	330.322
8.0-15C-R2	7	14.6	8.077	30.5	2100.5	8.2124	333.31	334.524	1747.77	142.299	12.9612	65.5288	2.60859	0	0	11.6985	3.48972	2.21673	340.003
8.0-15C-R3	0	16.2	8.03	30.5	2143.7	8.14296	413.864	415.341	1815.84	133.032	15.3339	59.2245	2.57549	0	0	12.4011	3.26808	2.08316	422.894
8.0-15C-R3	0.4	14.5	8.077	30.5	2137.5	8.21383	337.878	339.11	1779.6	144.87	13.1792	65.5772	2.59301	0	0	11.753	3.55242	2.25608	344.628
8.0-15C-R3	0.8	13.9	8.082	30.5	2136.4	8.2271	324.689	325.882	1775.46	145.981	12.9014	66.4539	2.52829	0	0	11.6931	3.57768	2.2693	330.98
8.0-15C-R3	1	14.2	8.076	30.5	2137.2	8.21687	334.47	335.694	1780.2	144.447	13.1672	65.5701	2.53948	0	0	11.7724	3.54104	2.24745	341.05
8.0-15C-R3	1.5	13.8	8.085	30.5	2137.2	8.23153	320.766	321.946	1774.08	146.859	12.7851	66.8795	2.53052	0	0	11.6543	3.59888	2.28228	326.949
8.0-15C-R3	2	14.2	8.08	30.5	2135.4	8.22096	330.523	331.733	1775.85	145.457	13.0119	66.0775	2.56352	0	0	11.7139	3.56582	2.26317	337.026
8.0-15C-R3	2.5	13.9	8.086	30.5	2135.4	8.23119	320.973	322.153	1771.77	147.058	12.7538	66.967	2.55224	0	0	11.6361	3.60406	2.28603	327.192
8.0-15C-R3	3	14.1	8.083	30.5	2106.2	8.22534	321.849	323.029	1748.76	144.192	12.7096	66.4935	2.56546	0	0	11.6328	3.53447	2.24282	328.148
8.0-15C-R3	3.5	14	8.088	30.5	2106.2	8.23181	316.091	317.251	1745.31	145.57	12.5209	67.1764	2.57987	0	0	11.5656	3.56791	2.26357	322.246
8.0-15C-R3	4	13.9	8.092	30.5	2120.8	8.2373	313.495	314.647	1755.02	147.731	12.4566	67.7387	2.58842	0	0	11.533	3.62058	2.29651	319.569
8.0-15C-R3	4.5	14.2	8.125	30.5	2104.2	8.26691	287.444	288.496	1716.75	156.31	11.316	71.9865	2.84961	0	0	11.0653	3.83185	2.43202	293.099
8.0-15C-R3	5	14.2	8.117	30.5	2098.3	8.25873	293.068	294.141	1717.66	153.473	11.5374	70.9056	2.79641	0	0	11.1614	3.7623	2.38788	298.833
8.0-15C-R3	5.5	14.7	8.094	30.5	2098.4	8.22843	319.078	320.239	1734.03	146.989	12.3698	67.6632	2.73183	0	0	11.4597	3.60508	2.29049	325.519
8.0-15C-R3	6	14.5	8.096	30.5	2100.3	8.23319	314.929	316.078	1734.34	147.623	12.284	68.0056	2.71122	0	0	11.4389	3.61992	2.29895	321.221
8.0-15C-R3	6.5	14.5	8.087	30.5	2100.3	8.22399	322.851	324.028	1740.7	145.057	12.593	66.8429	2.65438	0	0	11.5617	3.55701	2.25899	329.301
8.0-15C-R3	7	14.7	8.08	30.5	2109.8	8.21414	333.477	334.69	1753.62	143.837	12.928	65.8712	2.6434	0	0	11.6681	3.52778	2.24138	340.208
8.0-15C-R4	0	16.5	8.005	28.9	2030.6	8.11376	432.789	434.328	1745.51	115.313	16.0342	52.0845	2.39063	0	0	13.0424	2.86235	1.81638	442.388
8.0-15C-R4	0.4	14.2	8.024	28.9	2080.9	8.16409	382.857	384.259	1779.77	122.051	15.2083	54.8593	2.17321	0	0	12.8915	3.02051	1.90726	390.395
8.0-15C-R4	0.8	13.8	8.033	28.9	2041.8	8.17869	360.313	361.639	1740.21	121.726	14.4915	55.976	2.16539	0	0	12.7012	3.01109	1.89976	367.264
8.0-15C-R4	1	14.2	8.03	28.9	2042.4	8.17018	369.58	370.933	1742.35	121.174	14.6809	55.5095	2.20394	0	0	12.7382	2.9988	1.89355	376.856
8.0-15C-R4	1.5	13.7	8.036	28.9	2042.4	8.18314	355.978	357.29	1738.96	122.466	14.3618	56.344	2.16736	0	0	12.6586	3.02906	1.91071	362.81
8.0-15C-R4	2	14.5	8.026	28.9	2038.2	8.16201	377.582	378.959	1740.91	120.052	14.8607	54.9698	2.22389	0	0	12.7854	2.97207	1.87784	385.131
8.0-15C-R4	2.5	13.9	8.033	28.9	2038.2	8.17732	361.195	362.523	1737.01	121.54	14.4819	55.9414	2.17882	0	0	12.693	3.00683	1.89746	368.198
8.0-15C-R4	3	14.1	8.025	28.9	2046.1	8.1664	373.736	375.106	1748.66	120.143	14.892	54.9948	2.16462	0	0	12.8238	2.97295	1.87685	381.056
8.0-15C-R4	3.5	13.9	7.974	28.9	2023	8.11647	420.452	421.997	1757.62	106.904	16.8577	49.6862	1.89396	0	0	13.6005	2.64473	1.66896	428.604
8.0-15C-R4	4	13.8	7.99	28.9	2014	8.13433	399.203	400.672	1740.81	109.943	16.0556	51.3536	1.95512	0	0	13.3305	2.71963	1.71587	406.903
8.0-15C-R4	4.5	13.7	8.003	28.9	2044.7	8.14915	389.753	391.189	1760.63	114.658	15.7244	52.7545	2.00421	0	0	13.1772	2.83595	1.7889	397.233
8.0-15C-R4	5	14	8.001	28.9	2035.4	8.14302	395.027	396.477	1753.41	113.761	15.7892	52.4468	2.03216	0	0	13.1852	2.81471	1.77658	402.725
8.0-15C-R4	5.5	14.1	7.98	28.9	2061.9	8.12006	425.367	426.927	1788.8	110.462	16.9493	50.2433	1.94553	0	0	13.5623	2.73338	1.7256	433.699
8.0-15C-R4	6	14.8	7.986	28.9	2057.5	8.11687	430.091	431.654	1781.11	111.844	16.7722	50.6462	2.0607	0	0	13.4369	2.76988	1.7512	438.823
8.0-15C-R4	6.5	14	8.023	28.9	2057.6	8.16572	376.324	377.705	1760.02	120.318	15.0416	54.8117	2.14121	0	0	12.8757	2.97693	1.87897	383.657
8.0-15C-R5	0	16.5	8.005	28.9	2030.6	8.11376	432.789	434.328	1745.51	115.313	16.0342	52.0845	2.39063	0	0	13.0424	2.86235	1.81638	442.388
8.0-15C-R5	0.4	14.3	8.022	28.9	2042.86	8.16061	379.373	380.76	1747.51	119.293	15.0234	54.6009	2.17598	0	0	12.8599	2.95259	1.86476	386.88
8.0-15C-R5	0.8	13.8	8.033	28.9	2043.88	8.17869	360.688	362.015	1742.04	121.855	14.5066	55.9765	2.16541	0	0	12.7045	3.01428	1.90177	367.645
8.0-15C-R5	1	14.4	8.03	28.9	2044.9	8.16749	373.182	374.545	1744.43	121.401	14.7328	55.4429	2.23132	0	0	12.7371	3.00512	1.89833	380.605
8.0-15C-R5	1.5	13.8	8.037	28.9	2044.9	8.18281	356.967	358.281	1740.49	122.906	14.3569	56.4219	2.18604	0	0	12.6448	3.04028	1.91817	363.853
8.0-15C-R5	2	14.5	8.028	28.9	2042.4	8.16408	376.329	377.701	1743.39	120.795	14.8113	55.1894	2.23448	0	0	12.7613	2.99048	1.88948	383.853
8.0-15C-R5	2.5	14	8.034	28.9	2042.4	8.17701	362.504	363.834	1740.02	122.083	14.4893	56.0194	2.19758	0	0	12.6818	3.0206	1.90654	369.568
8.0-15C-R5	3	14.3	8.027	28.9	2041.4	8.16575	373.992	375.359	1743.22	120.417	14.8103	55.1464	2.20188	0	0	12.7803	2.98041	1.88233	381.392
8.0-15C-R5	3.5	14.1	7.975	28.9	2023	8.11483	422.861	424.411	1756.96	107.197	16.8494	49.7288	1.92223	0	0	13.578	2.65259	1.6746	431.144
8.0-15C-R5	4	14	7.989	28.9	2020.6	8.13062	405.015	406.501	1747.12	110.162	16.1884	51.1904	1.97494	0	0	13.3517	2.72565	1.72037	412.907
8.0-15C-R5	4.5	13.8	8.001	28.9	2038	8.14572	392.215	393.658	1755.81	113.839	15.7745	52.51	2.0071	0	0	13.1952	2.816	1.77667	399.78
8.0-15C-R5	5	14.1	8	28.9	2034.6	8.14064	397.611	399.069	1753.22	113.519	15.8433	52.31	2.03994	0	0	13.1969	2.80903	1.77336	405.399
8.0-15C-R5	5.5	14.4	7.981	28.9	2051.8	8.11705	427.463	429.024	1779.09	110.238	16.8757	50.2542	1.98668	0	0	13.5202	2.72881	1.72378	435.965
8.0-15C-R5	6	14.9	7.986	28.9	2048	8.11552	429.864	431.424	1772.63	111.346	16.7122	50.6146	2.07335	0	0	13.4182	2.75791	1.744	438.637
8.0-15C-R5	6.5	14.3	8.023	28.9	2048.1	8.16165	379.335	380.722	1751.51	119.852	15.0219	54.7107	2.18119	0	0	12.8528	2.96644	1.87351	386.841
8.0-15C-R6	0	16	8.027	29.1	2056.2	8.14289	403.575	405.019	1753.59	122.521	15.1597	55.1225	2.4535	0	0	12.7023	3.03537	1.92535	412.294
8.0-15C-R6	0.4	14.2	8.045	29.1	2060.7	8.18555	357.122	358.43	1747.38	126.646	14.1701	57.745	2.29326	0	0	12.4821	3.13054	1.9781	364.153
8.0-15C-R6	0.8	14.2	8.055	29.1	2063.2	8.19582	347.948	349.222	1743.23	129.369	13.8061	58.8914	2.34814	0	0	12.3362	3.19785	2.02062	354.798
8.0-15C-R6	1	13.9	8.063	29.1	2065.2	8.20812	336.447	337.684	1739.99	131.468	13.4744	59.9306	2.34907	0	0	12.2275	3.24867	2.05147	342.97
8.0-15C-R6	1.5	13.9	8.048	29.1	2061.5	8.19271	349.873	351.159	1746.35	127.349	14.0121	58.1932	2.26719	0	0	12.4452	3.14688	1.9872	356.656
8.0-15C-R6	2	14.3	8.046	29.1	2060.9	8.18522	357.699	359.007	1746.87	126.95	14.1492	57.8237	2.31291	0	0	12.465	3.13841	1.98348	364.777
8.0-15C-R6	2.5	14.1	8.047	29.1	2061.2	8.18896	353.767	355.064	1746.61	127.149	14.0805	58.0081	2.28996	0	0	12.4551	3.14263	1.98533	360.696
8.0-15C-R6	3	14.2	8.052	29.1	2062.5	8.19274	350.686	351.97	1744.53	128.55	13.9147	58.5457	2.33155	0	0	12.3799	3.17761	2.00784	357.59
8.0-15C-R6	3.5	14	7.978	29.1	2043.8	8.11923	421.01	422.555	1772.31	109.504	16.8088	50.5614	1.93222	0	0	13.507	2.7062	1.70927	429.214
8.0-15C-R6	4	14	7.986	29.1	2045.8	8.12749	412.442	413.955	1769.58	111.435	16.4667	51.3881	1.96933	0	0	13.3818	2.75393	1.73941	420.478
8.0-15C-R6	4.5	14	8.032	29.1	2057.4	8.1749	366.259	367.603	1752.66	123.098	14.6229	56.3484	2.19645	0	0	12.6792	3.04218	1.92147	373.395
8.0-15C-R6	5	14.4	8.01	29.1	2051.8	8.14686	394.298	395.738	1760.78	117.545	15.5489	53.8026	2.13708	0	0	13.0003	2.90625	1.83713	402.14
8.0-15C-R6	5.5	13.8	8.023	29.1	2055.1	8.16834	371.731	373.099	1756.24	120.665	14.9339	55.4166	2.1236	0	0	12.8192	2.98139	1.88231	378.901
8.0-15C-R6	6	13.9	8.017	29.1	2053.6	8.16081	379.152	380.545	1758.47	119.152	15.1847	54.7247	2.10663	0	0	12.9074	2.94433	1.85929	386.502
8.0-15C-R6	6.5	14.1	8.035	29.1	2058.2	8.17663	364.97	366.308	1751.47	123.932	14.5264	56.6501	2.22584	0	0	12.6321	3.06313	1.9351	372.119
8.4-15C-R1	0	16.2	8.03	30.5	2143.7	8.14296	413.864	415.341	1815.84	133.032	15.3339	59.2245	2.57549	0	0	12.4011	3.26808	2.08316	422.894
8.4-15C-R1	0.4	14.5	8.456	30.5	2363.88	8.59982	124.752	125.207	1598.09	316.411	4.86604	126.657	6.30661	0	0	8.21075	7.75886	4.92751	127.244
8.4-15C-R1	0.8	14	8.469	30.5	2370.6	8.62013	117.566	117.997	1587.3	323.724	4.65698	129.543	6.30835	0	0	8.14261	7.93448	5.03383	119.855
8.4-15C-R1	1	14.3	8.45	30.5	2362.2	8.59656	125.883	126.343	1604.22	313.095	4.94045	125.649	6.14425	0	0	8.24792	7.67609	4.87292	128.372
8.4-15C-R1	1.5	14.2	8.439	30.5	2362.2	8.5868	129.652	130.127	1617.42	307.605	5.10408	123.618	5.95218	0	0	8.31811	7.54078	4.78602	132.203
8.4-15C-R1	2	14.3	8.458	30.5	2416.4	8.60475	125.766	126.226	1633.26	324.838	4.93585	127.202	6.26133	0	0	8.24104	7.96398	5.05567	128.253
8.4-15C-R1	2.5	13.9	8.453	30.5	2416.4	8.60536	125.497	125.958	1639.62	322.104	4.98657	126.53	6.0408	0	0	8.27497	7.89408	5.00716	127.928
8.4-15C-R1	3	14	8.448	30.5	2312	8.59871	122.218	122.666	1570.69	304.919	4.84125	125.468	6.00473	0	0	8.22205	7.47357	4.74141	124.598
8.4-15C-R1	3.5	13.9	8.478	30.5	2362	8.63069	113.376	113.793	1570.23	326.998	4.50497	131.373	6.4036	0	0	8.08495	8.01401	5.08324	115.573
8.4-15C-R1	4	14.1	8.462	30.5	2324.5	8.61153	118.216	118.649	1562.98	313.59	4.66827	128.098	6.24257	0	0	8.14646	7.68681	4.8777	120.53
8.4-15C-R1	4.5	14.3	8.517	30.5	2353	8.66462	101.653	102.025	1515.22	345.898	3.98952	138.798	7.18667	0	0	7.8681	8.4803	5.38344	103.663
8.4-15C-R1	5	14.2	8.5	30.5	2347.2	8.64876	106.517	106.907	1532.55	336.153	4.1933	135.483	6.86482	0	0	7.95107	8.24062	5.2302	108.612
8.4-15C-R1	5.5	14.6	8.484	30.5	2347.2	8.62681	113.994	114.409	1552.13	328.138	4.43278	132.023	6.77356	0	0	8.03408	8.04721	5.11171	116.283
8.4-15C-R1	6	14.5	8.469	30.5	2329.3	8.61297	117.978	118.408	1557.8	317.919	4.60182	129.164	6.50057	0	0	8.1059	7.79584	4.951	120.335
8.4-15C-R1	6.5	14.5	8.498	30.5	2329.3	8.64243	107.741	108.134	1522.46	332.514	4.2025	134.854	6.9568	0	0	7.94523	8.15372	5.17828	109.893
8.4-15C-R1	7	14.6	8.482	30.5	2336	8.62477	114.132	114.548	1546.72	325.458	4.43817	131.629	6.74174	0	0	8.0364	7.98147	5.06996	116.424
8.4-15C-R2	0	16.2	8.03	30.5	2143.7	8.14296	413.864	415.341	1815.84	133.032	15.3339	59.2245	2.57549	0	0	12.4011	3.26808	2.08316	422.894
8.4-15C-R2	0.4	14.5	8.49	30.5	2365.44	8.63435	112.293	112.702	1557.53	333.899	4.38006	133.282	6.82851	0	0	8.01607	8.1877	5.19986	114.536
8.4-15C-R2	0.8	13.8	8.493	30.5	2371.03	8.64738	108.129	108.527	1558.02	336.007	4.30983	134.405	6.5926	0	0	8.00979	8.23407	5.22175	110.213
8.4-15C-R2	1	13.9	8.473	30.5	2360.7	8.62561	115.092	115.515	1575.45	324.266	4.57316	130.394	6.32907	0	0	8.1125	7.94706	5.04077	117.322
8.4-15C-R2	1.5	14.2	8.456	30.5	2360.7	8.60407	122.946	123.396	1595.97	315.834	4.84008	126.875	6.19358	0	0	8.2107	7.74251	4.91406	125.365
8.4-15C-R2	2	14.2	8.467	30.5	2411.5	8.61531	121.509	121.954	1618.68	328.727	4.78352	129.017	6.35598	0	0	8.18417	8.05858	5.11467	123.9
8.4-15C-R2	2.5	13.9	8.459	30.5	2411.5	8.61145	122.927	123.379	1628.73	324.481	4.88447	127.687	6.12609	0	0	8.23449	7.95233	5.04411	125.309
8.4-15C-R2	3	14.2	8.451	30.5	2306.1	8.59891	121.831	122.277	1562.83	305.626	4.7962	125.898	6.12048	0	0	8.19702	7.49228	4.75524	124.228
8.4-15C-R2	3.5	14.1	8.476	30.5	2366.1	8.62582	115.307	115.729	1575.48	326.667	4.55338	130.834	6.45128	0	0	8.09789	8.00734	5.08109	117.564
8.4-15C-R2	4	14.2	8.46	30.5	2336.1	8.6081	120.103	120.543	1573.59	314.309	4.72816	127.641	6.25131	0	0	8.16692	7.70512	4.89033	122.466
8.4-15C-R2	4.5	14.3	8.489	30.5	2334.1	8.63614	110.1	110.502	1536.96	328.592	4.32101	133.228	6.73054	0	0	7.99884	8.05601	5.11409	112.277
8.4-15C-R2	5	14.2	8.496	30.5	2323.2	8.64466	106.703	107.093	1520.82	330.449	4.20062	134.684	6.80039	0	0	7.9535	8.1008	5.14146	108.802
8.4-15C-R2	5.5	14.7	8.481	30.5	2323.2	8.62232	114.329	114.745	1538.89	323.093	4.43224	131.355	6.76621	0	0	8.03101	7.92426	5.03468	116.637
8.4-15C-R2	6	14.5	8.468	30.5	2325.5	8.61195	118.142	118.573	1556.31	316.87	4.60822	128.969	6.48532	0	0	8.10867	7.77011	4.93466	120.503
8.4-15C-R2	6.5	14.4	8.489	30.5	2325.5	8.63471	110.155	110.558	1530.9	327.338	4.30991	133.151	6.77098	0	0	7.99125	8.02604	5.09613	112.345
8.4-15C-R2	7	14.5	8.471	30.5	2326.7	8.615	117.108	117.535	1553.55	318.535	4.56788	129.552	6.531	0	0	8.09223	7.81095	4.9606	119.448
8.4-15C-R3	0	16.2	8.03	30.5	2143.7	8.14296	413.864	415.341	1815.84	133.032	15.3339	59.2245	2.57549	0	0	12.4011	3.26808	2.08316	422.894
8.4-15C-R3	0.4	14.5	8.49	30.5	2370.6	8.63435	112.551	112.962	1561.14	334.677	4.39014	133.284	6.82861	0	0	8.02002	8.20677	5.21198	114.8
8.4-15C-R3	0.8	13.8	8.493	30.5	2376.5	8.64739	108.392	108.791	1561.83	336.835	4.3203	134.406	6.59271	0	0	8.01396	8.25436	5.23462	110.481
8.4-15C-R3	1	14	8.472	30.5	2365.6	8.62317	116.215	116.641	1580.09	324.518	4.60346	130.127	6.35269	0	0	8.12128	7.95394	5.04617	118.478
8.4-15C-R3	1.5	13.9	8.454	30.5	2365.6	8.60631	122.353	122.803	1602.03	315.404	4.86166	126.709	6.05396	0	0	8.22924	7.72988	4.90301	124.724
8.4-15C-R3	2	14.3	8.458	30.5	2389.5	8.60472	124.297	124.752	1614.06	320.993	4.87821	127.195	6.26082	0	0	8.22034	7.86971	4.99583	126.755
8.4-15C-R3	2.5	14	8.449	30.5	2389.5	8.59984	126.129	126.592	1625.17	316.316	4.99617	125.681	6.02035	0	0	8.27816	7.75291	4.91863	128.585
8.4-15C-R3	3	14.2	8.442	30.5	2325.3	8.5898	126.357	126.82	1587.23	303.951	4.97438	124.18	5.99337	0	0	8.26895	7.4512	4.72917	128.843
8.4-15C-R3	3.5	14	8.468	30.5	2355.3	8.6191	117.132	117.562	1577.68	320.994	4.6398	129.345	6.29331	0	0	8.13647	7.86758	4.99138	119.413
8.4-15C-R3	4	14.2	8.457	30.5	2327.1	8.60504	120.734	121.176	1570.76	311.539	4.75301	127.059	6.20741	0	0	8.17769	7.63723	4.84724	123.11
8.4-15C-R3	4.5	14.3	8.489	30.5	2336.3	8.63614	110.209	110.612	1538.5	328.922	4.3253	133.229	6.73058	0	0	8.00056	8.06412	5.11924	112.388
8.4-15C-R3	5	14.2	8.492	30.5	2320.4	8.64059	107.916	108.311	1523.77	328.002	4.2484	133.892	6.73696	0	0	7.97265	8.04081	5.10339	110.039
8.4-15C-R3	5.5	14.7	8.484	30.5	2320.4	8.62536	113.117	113.529	1533.29	324.18	4.38525	131.942	6.81379	0	0	8.01213	7.95091	5.05161	115.4
8.4-15C-R3	6	14.5	8.468	30.5	2320.8	8.61195	117.891	118.321	1552.98	316.187	4.59842	128.968	6.48523	0	0	8.10489	7.75336	4.92402	120.246
8.4-15C-R3	6.5	14.5	8.497	30.5	2320.8	8.64141	107.664	108.057	1517.79	330.71	4.1995	134.654	6.94037	0	0	7.94385	8.10948	5.15019	109.815
8.4-15C-R3	7	14.5	8.484	30.5	2333.5	8.62822	112.796	113.207	1542.57	326.054	4.39968	132.095	6.73275	0	0	8.02415	7.99532	5.07769	115.049
8.4-15C-R4	0	16.5	8.005	28.9	2030.6	8.11376	432.789	434.328	1745.51	115.313	16.0342	52.0845	2.39063	0	0	13.0424	2.86235	1.81638	442.388
8.4-15C-R4	0.4	14.4	8.43	28.9	2265.38	8.57559	132.293	132.776	1582.6	281.865	5.22276	113.344	5.71035	0	0	8.51222	6.9772	4.40749	134.924
8.4-15C-R4	0.8	13.8	8.439	28.9	2286.26	8.59331	126.571	127.036	1588.1	288.589	5.09056	115.36	5.62548	0	0	8.47319	7.13874	4.50398	129.012
8.4-15C-R4	1	14.3	8.407	28.9	2259.2	8.55363	140.816	141.331	1603.36	270.553	5.57639	109.362	5.37876	0	0	8.67343	6.6964	4.22923	143.602
8.4-15C-R4	1.5	13.7	8.45	28.9	2289.2	8.60593	122.007	122.456	1577.77	294.144	4.92232	117.409	5.73751	0	0	8.40273	7.27534	4.58923	124.348
8.4-15C-R4	2	14.5	8.433	28.9	2306	8.57727	134.136	134.625	1609.04	288.678	5.27926	113.819	5.78588	0	0	8.52501	7.1467	4.5155	136.818
8.4-15C-R4	2.5	14	8.447	28.9	2306	8.59861	125.731	126.193	1593.29	295.123	5.02548	116.666	5.80168	0	0	8.43401	7.30199	4.60886	128.182
8.4-15C-R4	3	14.1	8.374	28.9	2361.2	8.52311	161.338	161.93	1716.26	268.09	6.42873	103.844	4.92136	0	0	9.02268	6.6339	4.18803	164.498
8.4-15C-R4	3.5	14	8.416	28.9	2318.4	8.56713	138.944	139.454	1637.61	282.123	5.5536	111.15	5.39602	0	0	8.66098	6.98034	4.40584	141.652
8.4-15C-R4	4	14	8.383	28.9	2264.5	8.53352	149.728	150.278	1633.27	260.415	5.98464	105.413	4.99408	0	0	8.86549	6.44325	4.06684	152.646
8.4-15C-R4	4.5	13.8	8.438	28.9	2269.3	8.59227	125.973	126.437	1576.81	285.851	5.06654	115.176	5.61198	0	0	8.46561	7.07101	4.46125	128.403
8.4-15C-R4	5	14.1	8.402	28.9	2285.6	8.55144	143.432	143.957	1628.62	271.55	5.71521	108.629	5.2531	0	0	8.73602	6.71951	4.24208	146.241
8.4-15C-R4	5.5	14.3	8.433	28.9	2311.9	8.58012	133.319	133.807	1613.47	289.381	5.27954	113.956	5.71702	0	0	8.53169	7.1624	4.52354	135.958
8.4-15C-R4	6	14.9	8.407	28.9	2314.8	8.54522	148.273	148.811	1644.55	277.847	5.76453	108.983	5.57665	0	0	8.71649	6.88191	4.35186	151.299
8.4-15C-R4	6.5	14.2	8.419	28.9	2314.9	8.56733	138.685	139.193	1631.55	283.153	5.50903	111.544	5.49977	0	0	8.63445	7.00743	4.42476	141.416
8.4-15C-R5	0	16.7	8.005	28.9	2030.6	8.11111	436.385	437.933	1745.4	115.384	16.0718	52.0223	2.41964	0	0	13.0365	2.86495	1.81885	446.166
8.4-15C-R5	0.4	14.4	8.421	28.9	2252.9	8.56643	135.176	135.67	1583.34	276.111	5.33659	111.748	5.59116	0	0	8.56489	6.83477	4.31752	137.865
8.4-15C-R5	0.8	13.9	8.432	28.9	2243.9	8.5847	127.358	127.826	1564.82	279.744	5.10632	114.029	5.56672	0	0	8.484	6.92071	4.36731	129.827
8.4-15C-R5	1	14.5	8.406	28.9	2248.9	8.54977	141.805	142.322	1596.66	268.88	5.58109	109.054	5.43086	0	0	8.6699	6.65655	4.20581	144.64
8.4-15C-R5	1.5	13.8	8.451	28.9	2288.9	8.60551	122.154	122.604	1576.36	294.618	4.91294	117.521	5.78577	0	0	8.39504	7.28789	4.59808	124.51
8.4-15C-R5	2	14.5	8.435	28.9	2300.9	8.57929	133.013	133.499	1603.03	288.944	5.23507	114.174	5.81291	0	0	8.50688	7.15326	4.51965	135.673
8.4-15C-R5	2.5	14.2	8.45	28.9	2300.9	8.5988	125.392	125.851	1586.04	295.941	4.98098	117.069	5.91312	0	0	8.40817	7.32392	4.6246	127.861
8.4-15C-R5	3	14.3	8.373	28.9	2339.2	8.51922	161.664	162.255	1700.51	265.088	6.402	103.544	4.96901	0	0	9.01003	6.56114	4.1438	164.863
8.4-15C-R5	3.5	14.1	8.411	28.9	2265.4	8.56055	138.305	138.812	1603.71	273.066	5.51095	110.193	5.36449	0	0	8.65108	6.75704	4.26577	141.014
8.4-15C-R5	4	14.1	8.384	28.9	2285	8.53315	151.349	151.904	1647.65	263.394	6.03071	105.526	5.03647	0	0	8.8751	6.51768	4.11466	154.314
8.4-15C-R5	4.5	13.9	8.434	28.9	2376.8	8.58694	134.425	134.919	1660.15	298.316	5.38965	114.421	5.59539	0	0	8.58107	7.38017	4.65725	137.031
8.4-15C-R5	5	14.2	8.393	28.9	2285.1	8.54087	147.978	148.52	1637.98	267.468	5.87815	107.007	5.17472	0	0	8.80364	6.61927	4.17966	150.891
8.4-15C-R5	5.5	14.4	8.434	28.9	2310.1	8.57971	133.39	133.877	1610.96	289.655	5.26609	114.066	5.76486	0	0	8.52237	7.17003	4.5293	136.044
8.4-15C-R5	6	14.8	8.403	28.9	2312.1	8.54257	149.233	149.775	1647.01	275.624	5.81962	108.354	5.49181	0	0	8.74517	6.826	4.31559	152.263
8.4-15C-R5	6.5	14.3	8.428	28.9	2312.2	8.57504	135.38	135.875	1619.36	287.062	5.36113	113.068	5.65057	0	0	8.56696	7.10501	4.4873	138.059
8.4-15C-R6	0	16	8.045	29.1	2098.4	8.16138	392.427	393.831	1779.28	129.721	14.741	57.1229	2.56017	0	0	12.4957	3.21375	2.0385	400.906
8.4-15C-R6	0.4	14.1	8.465	29.1	2330.3	8.6154	120.378	120.819	1586.57	308.328	4.79121	120.961	6.11313	0	0	8.30967	7.62067	4.81428	122.735
8.4-15C-R6	0.8	14.2	8.432	29.1	2311.4	8.58042	132.643	133.129	1611.09	289.863	5.26308	114.89	5.69274	0	0	8.51097	7.16508	4.5274	135.254
8.4-15C-R6	1	13.8	8.445	29.1	2324.9	8.59935	126.02	126.484	1606.22	297.723	5.06272	117.513	5.72905	0	0	8.43726	7.35613	4.64431	128.451
8.4-15C-R6	1.5	13.9	8.449	29.1	2315.9	8.60198	124.529	124.986	1594.99	298.463	4.98726	118.169	5.81776	0	0	8.40255	7.37523	4.65732	126.943
8.4-15C-R6	2	14.2	8.436	29.1	2312.5	8.58448	131.101	131.581	1607.34	291.906	5.20189	115.609	5.74627	0	0	8.48439	7.21558	4.55931	133.682
8.4-15C-R6	2.5	13.9	8.444	29.1	2324.6	8.59691	126.948	127.414	1607.11	297.241	5.08414	117.263	5.75025	0	0	8.44284	7.34503	4.63825	129.409
8.4-15C-R6	3	13.9	8.414	29.1	2306.6	8.56639	137.959	138.466	1628.01	280.677	5.52515	111.882	5.36009	0	0	8.63726	6.93571	4.37977	140.634
8.4-15C-R6	3.5	13.7	8.453	29.1	2337	8.60893	123.091	123.545	1605.72	303.219	4.96048	119.042	5.80243	0	0	8.39517	7.49112	4.72858	125.453
8.4-15C-R6	4	13.9	8.433	29.1	2309.7	8.58571	130.406	130.885	1608.85	289.987	5.22265	115.273	5.60384	0	0	8.50523	7.16578	4.52505	132.934
8.4-15C-R6	4.5	14	8.439	29.1	2320.3	8.59039	129.222	129.696	1609.69	294.302	5.15919	116.289	5.71765	0	0	8.47214	7.27319	4.59382	131.74
8.4-15C-R6	5	14.2	8.451	29.1	2356.5	8.59978	127.715	128.183	1621.97	305.124	5.06754	118.335	5.9523	0	0	8.41961	7.54233	4.76577	130.229
8.4-15C-R6	5.5	13.7	8.459	29.1	2358.6	8.61506	122.011	122.46	1614.25	309.162	4.91693	120.146	5.88491	0	0	8.37355	7.63795	4.82126	124.352
8.4-15C-R6	6	13.8	8.448	29.1	2332.1	8.60241	125.272	125.733	1607.96	300.154	5.03264	118.06	5.76956	0	0	8.4232	7.41621	4.68224	127.688
8.4-15C-R6	6.5	14	8.458	29.1	2358.3	8.60975	124.001	124.457	1615.08	308.747	4.95076	119.753	5.97829	0	0	8.37721	7.63018	4.8193	126.418
7.6-18C-R1	0	16.2	8.03	30.5	2143.7	8.14296	413.864	415.341	1815.84	133.032	15.3339	59.2245	2.57549	0	0	12.4011	3.26808	2.08316	422.894
7.6-18C-R1	0.4	17	7.634	30.5	2141.2	7.7224	1211.73	1216.01	2000.38	57.1627	43.8446	25.4633	1.05166	0	0	17.9253	1.40565	0.897627	1239.3
7.6-18C-R1	0.8	16.8	7.619	30.5	2137.4	7.70892	1247.87	1252.3	2001.63	55.0795	45.4191	24.6313	1.00121	0	0	18.0403	1.35408	0.864297	1275.97
7.6-18C-R1	1	16.9	7.622	30.5	2137.8	7.71093	1243.14	1247.54	2001.01	55.5037	45.1136	24.7914	1.01501	0	0	18.0119	1.36468	0.871264	1271.27
7.6-18C-R1	1.5	16.8	7.621	30.5	2137.8	7.71103	1241.69	1246.09	2001.39	55.3406	45.194	24.7428	1.00607	0	0	18.0283	1.3605	0.868395	1269.64
7.6-18C-R1	2	16.9	7.624	30.5	2144.31	7.71303	1240.56	1244.95	2006.55	55.9278	45.02	24.9035	1.01994	0	0	18.0092	1.37511	0.87792	1268.64
7.6-18C-R1	2.5	16.9	7.641	30.5	2144.31	7.73092	1187.3	1191.5	2001.15	58.1221	43.0873	25.8757	1.06282	0	0	17.8875	1.42906	0.912366	1214.17
7.6-18C-R1	3	16.8	7.661	30.5	2100.6	7.75311	1100	1103.89	1953.42	59.5104	40.0367	27.0724	1.10845	0	0	17.6559	1.46301	0.933826	1124.76
7.6-18C-R1	3.5	16.9	7.632	30.5	2100.6	7.72146	1190.11	1194.32	1962.67	55.7764	43.1893	25.3572	1.03992	0	0	17.8844	1.37139	0.875545	1217.05
7.6-18C-R1	4	16.8	7.64	30.5	2115.1	7.73103	1169.52	1173.66	1973.93	57.1545	42.5672	25.8261	1.0535	0	0	17.8579	1.40509	0.896858	1195.85
7.6-18C-R1	4.5	17.1	7.671	30.5	2114.4	7.76008	1091.43	1095.28	1962.85	61.3789	39.3759	27.6545	1.15739	0	0	17.557	1.50952	0.96418	1116.39
7.6-18C-R1	5	17.1	7.672	30.5	2096.8	7.76113	1079.42	1083.23	1945.95	60.9974	38.9428	27.7162	1.16019	0	0	17.5176	1.50014	0.958187	1104.11
7.6-18C-R1	5.5	17.6	7.658	30.5	2096.8	7.74062	1140.56	1144.56	1950.25	59.2955	40.5518	26.8175	1.15775	0	0	17.602	1.45925	0.933158	1167.34
7.6-18C-R1	6	17.4	7.645	30.5	2106.9	7.72933	1176.28	1180.42	1964.15	57.798	42.0663	26.0668	1.10789	0	0	17.7472	1.42202	0.90892	1203.61
7.6-18C-R1	6.5	17.4	7.646	30.5	2106.9	7.73038	1173.25	1177.38	1963.83	57.9282	41.958	26.1253	1.11056	0	0	17.7392	1.42522	0.910968	1200.52
7.6-18C-R1	7	17.6	7.653	30.5	2115.5	7.73539	1165.79	1169.88	1969.53	59.1643	41.449	26.5198	1.14388	0	0	17.6762	1.45602	0.931093	1193.17
7.6-18C-R2	0	16.2	8.03	30.5	2143.7	8.14296	413.864	415.341	1815.84	133.032	15.3339	59.2245	2.57549	0	0	12.4011	3.26808	2.08316	422.894
7.6-18C-R2	0.4	17	7.623	30.5	2134.8	7.71083	1242.82	1247.21	1997.78	55.5879	44.9696	24.8399	1.02402	0	0	17.9908	1.36693	0.872898	1271.1
7.6-18C-R2	0.8	16.9	7.624	30.5	2128.4	7.71304	1231.23	1235.59	1991.48	55.5081	44.6815	24.9037	1.01995	0	0	17.9842	1.36479	0.871333	1259.1
7.6-18C-R2	1	16.9	7.633	30.5	2137.6	7.72251	1208.24	1212.51	1997.36	56.8993	43.847	25.4141	1.04243	0	0	17.9367	1.39899	0.893171	1235.58
7.6-18C-R2	1.5	16.9	7.657	30.5	2137.6	7.74774	1135.59	1139.61	1989.56	60.067	41.2107	26.8217	1.10478	0	0	17.7438	1.47688	0.942895	1161.29
7.6-18C-R2	2	16.9	7.645	30.5	2137.2	7.73513	1171.15	1175.29	1993.13	58.4528	42.501	26.1094	1.07316	0	0	17.8445	1.43719	0.917556	1197.65
7.6-18C-R2	2.5	16.9	7.663	30.5	2137.2	7.75404	1117.89	1121.85	1987.17	60.8716	40.5684	27.1842	1.12092	0	0	17.6889	1.49666	0.955525	1143.19
7.6-18C-R2	3	16.9	7.652	30.5	2106.3	7.74249	1133.3	1137.31	1961.68	58.5136	41.1274	26.523	1.09151	0	0	17.7359	1.43868	0.91851	1158.94
7.6-18C-R2	3.5	16.9	7.655	30.5	2106.3	7.74564	1124.54	1128.52	1960.7	58.9103	40.8096	26.7019	1.09945	0	0	17.7099	1.44844	0.924738	1149.99
7.6-18C-R2	4	16.8	7.657	30.5	2112.1	7.74891	1117.61	1121.57	1965.58	59.3043	40.6778	26.831	1.09777	0	0	17.7112	1.45794	0.930592	1142.77
7.6-18C-R2	4.5	17	7.702	30.5	2108.8	7.79373	1000.68	1004.21	1946.82	65.5617	36.208	29.6363	1.23936	0	0	17.2272	1.61218	1.02952	1023.44
7.6-18C-R2	5	17.1	7.711	30.5	2105.7	7.80194	979.899	983.357	1940.58	66.8225	35.3522	30.2192	1.2745	0	0	17.1084	1.6434	1.04969	1002.31
7.6-18C-R2	5.5	17.6	7.671	30.5	2105.7	7.75422	1107.71	1111.6	1954.3	61.3076	39.3839	27.6051	1.19455	0	0	17.4968	1.50877	0.964824	1133.72
7.6-18C-R2	6	17.4	7.662	30.5	2098.7	7.74714	1121.39	1125.33	1950.87	59.8102	40.1032	27.0764	1.15426	0	0	17.5879	1.47152	0.940563	1147.45
7.6-18C-R2	6.5	17.3	7.668	30.5	2098.7	7.75459	1099.97	1103.85	1948.94	60.5824	39.4525	27.4506	1.16369	0	0	17.5412	1.49032	0.952359	1125.4
7.6-18C-R2	7	17.6	7.666	30.5	2116.6	7.74899	1127.98	1131.93	1966.25	60.9444	40.1045	27.2997	1.18026	0	0	17.5623	1.49983	0.959107	1154.47
7.6-18C-R3	0	16.2	8.03	30.5	2143.7	8.14296	413.864	415.341	1815.84	133.032	15.3339	59.2245	2.57549	0	0	12.4011	3.26808	2.08316	422.894
7.6-18C-R3	0.4	17	7.622	30.5	2138.4	7.70978	1248.16	1252.57	2001.5	55.5567	45.1627	24.7839	1.02154	0	0	18.0029	1.36616	0.872407	1276.56
7.6-18C-R3	0.8	16.9	7.609	30.5	2123.6	7.69724	1276.85	1281.37	1991.51	53.5266	46.337	24.0734	0.983522	0	0	18.067	1.31607	0.840229	1305.75
7.6-18C-R3	1	16.9	7.621	30.5	2138.3	7.70988	1246.64	1251.05	2001.79	55.391	45.2408	24.7354	1.01255	0	0	18.0191	1.36191	0.869494	1274.86
7.6-18C-R3	1.5	16.9	7.651	30.5	2138.3	7.74143	1153.73	1157.81	1992.21	59.2801	41.8689	26.4634	1.08886	0	0	17.7968	1.45753	0.930544	1179.84
7.6-18C-R3	2	16.9	7.64	30.5	2145.6	7.72987	1191.1	1195.31	2002.69	58.0262	43.2251	25.8176	1.06025	0	0	17.8973	1.4267	0.91086	1218.06
7.6-18C-R3	2.5	16.9	7.643	30.5	2145.6	7.73302	1181.9	1186.08	2001.72	58.4209	42.8913	25.9923	1.06798	0	0	17.8739	1.43641	0.917056	1208.65
7.6-18C-R3	3	16.9	7.618	30.5	2096.8	7.70673	1231.62	1235.98	1963.38	53.9355	44.6956	24.5689	1.00524	0	0	17.9722	1.32612	0.846647	1259.49
7.6-18C-R3	3.5	17.1	7.611	30.5	2096.8	7.69708	1263.42	1267.88	1965.33	53.1577	45.581	24.1692	1.0011	0	0	17.9935	1.30733	0.835035	1292.32
7.6-18C-R3	4	16.9	7.618	30.5	2117.9	7.70672	1244.18	1248.58	1983.38	54.4844	45.1514	24.5686	1.00523	0	0	18.0058	1.33962	0.855264	1272.34
7.6-18C-R3	4.5	17.7	7.705	30.5	2114	7.78852	1022.54	1026.12	1950.11	66.4255	36.2502	29.7511	1.30442	0	0	17.1425	1.63494	1.04575	1046.68
7.6-18C-R3	5	18.1	7.699	30.5	2107.9	7.77754	1051.4	1055.07	1946.27	65.5048	36.8447	29.315	1.31832	0	0	17.1656	1.61318	1.03282	1076.76
7.6-18C-R3	5.5	17.6	7.648	30.5	2107.9	7.73016	1176.6	1180.73	1963.98	58.2911	41.8333	26.2252	1.13018	0	0	17.7054	1.43453	0.917352	1204.23
7.6-18C-R3	6	17.4	7.672	30.5	2108.5	7.7576	1097.99	1101.85	1956.74	61.4535	39.2663	27.6863	1.18241	0	0	17.5101	1.51195	0.966405	1123.5
7.6-18C-R3	6.5	18.8	7.76	30.5	2108.5	7.83241	922.871	926.059	1923.2	75.1671	31.6984	33.3872	1.59228	0	0	16.3554	1.85304	1.1884	945.968
7.6-18C-R3	7	18.5	7.774	30.5	2106	7.85049	878.677	881.724	1915.39	77.2744	30.44	34.4562	1.61621	0	0	16.18	1.90414	1.22027	900.32
7.6-18C-R4	0	16.5	8.005	28.9	2030.6	8.11376	432.789	434.328	1745.51	115.313	16.0342	52.0845	2.39063	0	0	13.0424	2.86235	1.81638	442.388
7.6-18C-R4	0.4	17.2	7.622	28.9	2054	7.70738	1228.07	1232.4	1927.85	51.1574	44.5675	22.8544	0.999196	0	0	18.2431	1.27119	0.807955	1256.33
7.6-18C-R4	0.8	17.3	7.61	28.9	2049	7.69362	1268.08	1272.55	1926.42	49.6923	45.8848	22.2361	0.976805	0	0	18.2838	1.23498	0.785119	1297.41
7.6-18C-R4	1	17.1	7.6	28.9	2048.1	7.68537	1290.89	1295.45	1928.47	48.481	46.9852	21.749	0.941274	0	0	18.3443	1.2045	0.765389	1320.44
7.6-18C-R4	1.5	16.9	7.605	28.9	2048.1	7.6929	1265.02	1269.5	1927.24	48.9673	46.3155	22.0092	0.9406	0	0	18.346	1.21621	0.772478	1293.68
7.6-18C-R4	2	17.1	7.591	28.9	2047.7	7.67589	1320.79	1325.45	1930.52	47.4846	48.0733	21.3085	0.920949	0	0	18.3735	1.17974	0.749659	1351.02
7.6-18C-R4	2.5	16.9	7.65	28.9	2047.7	7.7403	1126.35	1130.33	1913.83	54.2338	41.2384	24.3669	1.04906	0	0	18.0811	1.34702	0.855559	1151.86
7.6-18C-R4	3	17.1	7.614	28.9	2048.8	7.70011	1245.73	1250.13	1925.25	50.0712	45.3414	22.4508	0.973773	0	0	18.286	1.24401	0.790495	1274.25
7.6-18C-R4	3.5	17.1	7.648	28.9	2025	7.73587	1127.92	1131.9	1892.81	53.4531	41.0535	24.2419	1.05736	0	0	18.0377	1.32803	0.843887	1153.74
7.6-18C-R4	4	16.8	7.642	28.9	2029.5	7.73305	1135.2	1139.22	1899.07	52.7459	41.6853	23.9396	1.02239	0	0	18.1186	1.30986	0.831772	1160.78
7.6-18C-R4	4.5	17	7.584	28.9	2035.3	7.66964	1331.57	1336.27	1920.63	46.4097	48.6084	20.9769	0.899629	0	0	18.3837	1.15286	0.73241	1361.89
7.6-18C-R4	5	16.9	7.582	28.9	2035.9	7.66865	1333.91	1338.63	1921.79	46.1765	48.8377	20.8864	0.889505	0	0	18.4	1.14689	0.728452	1364.12
7.6-18C-R4	5.5	16.9	7.621	28.9	2036.8	7.70977	1207.22	1211.49	1912.01	50.5043	44.1992	22.8228	0.97785	0	0	18.2515	1.25439	0.796725	1234.56
7.6-18C-R4	6	16.6	7.613	28.9	2050.6	7.70477	1227	1231.36	1927.6	49.826	45.3239	22.4315	0.940738	0	0	18.3459	1.23698	0.785138	1254.36
7.6-18C-R4	6.5	17.1	7.618	28.9	2050.7	7.70432	1234.15	1238.5	1925.93	50.5767	44.9197	22.6551	0.983259	0	0	18.2692	1.25657	0.798476	1262.39
7.6-18C-R5	0	16.5	8.005	28.9	2030.6	8.11376	432.789	434.328	1745.51	115.313	16.0342	52.0845	2.39063	0	0	13.0424	2.86235	1.81638	442.388
7.6-18C-R5	0.4	17.4	7.635	28.9	2052.1	7.71875	1195.48	1199.69	1922.13	52.7111	43.1314	23.5205	1.04434	0	0	18.1427	1.31021	0.833138	1223.28
7.6-18C-R5	0.8	17.3	7.594	28.9	2047.6	7.67679	1320.28	1324.93	1929.48	47.8791	47.7737	21.4436	0.939673	0	0	18.3427	1.18992	0.756471	1350.82
7.6-18C-R5	1	17	7.618	28.9	2047.6	7.70546	1227.68	1232.02	1923.05	50.4643	44.816	22.6616	0.976989	0	0	18.2746	1.25358	0.796396	1255.63
7.6-18C-R5	1.5	16.9	7.594	28.9	2047.6	7.6813	1300.97	1305.58	1929.76	47.7391	47.6317	21.4653	0.915807	0	0	18.3855	1.1857	0.753102	1330.44
7.6-18C-R5	2	17.1	7.609	28.9	2046.4	7.69485	1260.34	1264.79	1924.37	49.4454	45.8731	22.1979	0.962045	0	0	18.3052	1.22846	0.780616	1289.19
7.6-18C-R5	2.5	17	7.592	28.9	2046.4	7.67807	1311.72	1316.36	1929.09	47.5278	47.884	21.3624	0.917262	0	0	18.3792	1.18064	0.750054	1341.59
7.6-18C-R5	3	17.1	7.612	28.9	2049.5	7.698	1252.58	1257	1926.48	49.8608	45.5907	22.3493	0.969065	0	0	18.2966	1.23878	0.787174	1281.25
7.6-18C-R5	3.5	17.1	7.613	28.9	2031.7	7.69906	1238.37	1242.74	1909.28	49.5362	45.0736	22.4003	0.97143	0	0	18.2632	1.23071	0.782048	1266.72
7.6-18C-R5	4	16.8	7.586	28.9	2017.1	7.674	1303.13	1307.74	1902.88	46.1335	47.8517	21.0834	0.892429	0	0	18.3717	1.14565	0.727498	1332.49
7.6-18C-R5	4.5	17	7.574	28.9	2031	7.65909	1363.22	1368.04	1919.12	45.2609	49.764	20.5037	0.878047	0	0	18.3968	1.12432	0.714279	1394.26
7.6-18C-R5	5	16.9	7.59	28.9	2037.6	7.67709	1307.9	1312.53	1921.3	47.0707	47.8854	21.2709	0.906962	0	0	18.3821	1.1691	0.742559	1337.52
7.6-18C-R5	5.5	16.9	7.593	28.9	2041.2	7.68025	1300.19	1304.79	1923.93	47.4797	47.603	21.4167	0.913592	0	0	18.3787	1.17926	0.749011	1329.64
7.6-18C-R5	6	16.9	7.588	28.9	2056.2	7.67497	1326.79	1331.49	1939.57	47.2871	48.5771	21.1738	0.902549	0	0	18.4165	1.17448	0.745972	1356.85
7.6-18C-R5	6.5	16.9	7.588	28.9	2056.3	7.67497	1326.86	1331.55	1939.67	47.2894	48.5794	21.1738	0.90255	0	0	18.4166	1.17454	0.746009	1356.91
7.6-18C-R6	0	16	8.045	29.1	2035.6	8.16128	380.433	381.795	1724.53	125.702	14.2904	57.1127	2.55962	0	0	12.3999	3.11418	1.97534	388.653
7.6-18C-R6	0.4	17.3	7.624	29.1	2053.9	7.70836	1223.57	1227.87	1926.31	51.7049	44.2253	23.1885	1.01498	0	0	18.172	1.28337	0.816446	1251.87
7.6-18C-R6	0.8	17.1	7.681	29.1	2069	7.77052	1056.29	1060.02	1923.17	59.1647	38.4039	26.3698	1.15022	0	0	17.775	1.46808	0.933525	1080.47
7.6-18C-R6	1	17.3	7.615	29.1	2051.5	7.6989	1250.7	1255.11	1926.61	50.5989	45.2061	22.7218	0.993114	0	0	18.2163	1.25592	0.798982	1279.63
7.6-18C-R6	1.5	17.2	7.658	29.1	2062.9	7.74522	1121.8	1125.75	1924.69	56.0488	40.6659	25.0393	1.09497	0	0	17.9605	1.39098	0.884699	1147.61
7.6-18C-R6	2	17.2	7.605	29.1	2048.8	7.68952	1276.78	1281.28	1926.92	49.3596	46.2842	22.2192	0.96317	0	0	18.2687	1.22497	0.779114	1306.16
7.6-18C-R6	2.5	16.9	7.627	29.1	2054.7	7.71611	1196.64	1200.87	1926.48	51.9367	43.7635	23.3739	0.996595	0	0	18.1968	1.28835	0.818859	1223.74
7.6-18C-R6	3	17.2	7.591	29.1	2045.1	7.67479	1321.05	1325.71	1927.23	47.7206	47.8891	21.5241	0.931039	0	0	18.3142	1.18429	0.753243	1351.45
7.6-18C-R6	3.5	17.2	7.593	29.1	2045.6	7.67689	1314.62	1319.26	1927.16	47.9508	47.656	21.6222	0.935562	0	0	18.3086	1.19001	0.756877	1344.87
7.6-18C-R6	4	17.5	7.639	29.1	2057.8	7.72181	1188.39	1192.56	1925.45	53.6664	42.7034	23.9707	1.06593	0	0	18.0643	1.33247	0.848076	1216.17
7.6-18C-R6	4.5	17	7.629	29.1	2055.2	7.71706	1195.25	1199.47	1926.3	52.2217	43.5839	23.4727	1.00786	0	0	18.1753	1.29561	0.823663	1222.46
7.6-18C-R6	5	16.7	7.645	29.1	2059.5	7.73738	1136.48	1140.51	1925.81	54.1591	41.8096	24.3585	1.02784	0	0	18.1047	1.34308	0.853259	1161.95
7.6-18C-R6	5.5	17.1	7.589	29.1	2044.6	7.6738	1322.65	1327.32	1927.36	47.4562	48.0878	21.4318	0.920589	0	0	18.3302	1.17755	0.748784	1352.92
7.6-18C-R6	6	17	7.657	29.1	2062.6	7.7465	1116.07	1120.01	1924.85	55.8429	40.6967	25.0001	1.07856	0	0	17.9876	1.38545	0.880778	1141.48
7.6-18C-R6	6.5	17.6	7.623	29.1	2053.6	7.70388	1240.28	1244.63	1926.1	51.6865	44.4382	23.116	1.03206	0	0	18.1461	1.28351	0.817108	1269.42
8.0-18C-R1	0	16.2	8.03	30.5	2143.7	8.14296	413.864	415.341	1815.84	133.032	15.3339	59.2245	2.57549	0	0	12.4011	3.26808	2.08316	422.894
8.0-18C-R1	0.4	17	8.018	30.5	2129.16	8.12011	438.908	440.458	1810.44	129.268	15.8812	57.5603	2.62772	0	0	12.537	3.17874	2.02989	448.894
8.0-18C-R1	0.8	16.8	8.029	30.5	2127.58	8.13397	422.197	423.693	1802.11	131.96	15.3668	58.8935	2.66426	0	0	12.3773	3.24411	2.07069	431.703
8.0-18C-R1	1	16.8	8.04	30.5	2135	8.14521	411.244	412.7	1801.37	135.363	14.9681	60.1808	2.7341	0	0	12.2275	3.32777	2.12409	420.502
8.0-18C-R1	1.5	16.8	8.057	30.5	2135	8.16255	392.649	394.04	1789.98	139.986	14.2913	62.2113	2.84547	0	0	11.9834	3.44143	2.19664	401.489
8.0-18C-R1	2	16.8	8.066	30.5	2136.5	8.17173	383.396	384.754	1785.12	142.587	13.9545	63.3075	2.90623	0	0	11.8584	3.50537	2.23745	392.028
8.0-18C-R1	2.5	16.9	8.067	30.5	2136.5	8.17142	383.945	385.304	1784.37	142.905	13.9334	63.3919	2.93061	0	0	11.8422	3.51363	2.24324	392.635
8.0-18C-R1	3	16.9	8.083	30.5	2102.4	8.18767	361.476	362.755	1744	144.996	13.118	65.3726	3.04234	0	0	11.5729	3.56505	2.27607	369.657
8.0-18C-R1	3.5	17	8.061	30.5	2102.4	8.16393	385.508	386.87	1759.02	138.932	13.949	62.6157	2.90674	0	0	11.8756	3.41639	2.18165	394.279
8.0-18C-R1	4	16.9	8.081	30.5	2115.7	8.18565	365.823	367.117	1756.79	145.383	13.2758	65.124	3.02824	0	0	11.619	3.57455	2.28213	374.103
8.0-18C-R1	4.5	17	8.096	30.5	2106.1	8.19957	350.882	352.122	1737.95	149.008	12.6962	66.9806	3.15533	0	0	11.4005	3.66415	2.33987	358.866
8.0-18C-R1	5	17.1	8.102	30.5	2100.4	8.20434	345.612	346.831	1728.76	150.357	12.4688	67.7092	3.21912	0	0	11.3108	3.69781	2.36191	353.517
8.0-18C-R1	5.5	17.7	8.068	30.5	2100.4	8.1618	388.973	390.335	1752.18	140.972	13.7895	63.2024	3.08104	0	0	11.7596	3.46978	2.21937	398.155
8.0-18C-R1	6	17.4	8.078	30.5	2112.3	8.17595	375.977	377.299	1755.69	144.481	13.4457	64.5525	3.09828	0	0	11.645	3.5547	2.27209	384.713
8.0-18C-R1	6.5	17.9	8.059	30.5	2112.3	8.15003	404.281	405.693	1768.42	139.398	14.2494	62.0369	3.05297	0	0	11.8978	3.43198	2.19623	413.926
8.0-18C-R1	7	17.6	8.074	30.5	2116.4	8.16924	384.044	385.391	1761.87	143.723	13.6544	63.9799	3.10623	0	0	11.7016	3.53699	2.26183	393.063
8.0-18C-R2	0	16.2	8.03	30.5	2143.7	8.14296	413.864	415.341	1815.84	133.032	15.3339	59.2245	2.57549	0	0	12.4011	3.26808	2.08316	422.894
8.0-18C-R2	0.4	17	8.037	30.5	2133	8.1395	417.661	419.137	1801.5	134.504	15.1125	59.7558	2.74775	0	0	12.2633	3.3075	2.11212	427.164
8.0-18C-R2	0.8	16.8	8.043	30.5	2130.1	8.14827	406.946	408.388	1795.13	135.846	14.8117	60.5346	2.7534	0	0	12.1769	3.33965	2.13167	416.108
8.0-18C-R2	1	16.9	8.054	30.5	2137.5	8.15817	398	399.408	1794.12	139.368	14.4434	61.8122	2.84256	0	0	12.0274	3.42667	2.18771	407.008
8.0-18C-R2	1.5	16.9	8.071	30.5	2137.5	8.17549	379.952	381.296	1782.47	144.098	13.7885	63.8842	2.95824	0	0	11.7878	3.54297	2.26197	388.552
8.0-18C-R2	2	16.9	8.076	30.5	2138.8	8.18059	375.022	376.349	1780.1	145.605	13.6096	64.5038	2.99315	0	0	11.7202	3.58002	2.28562	383.51
8.0-18C-R2	2.5	16.9	8.082	30.5	2138.8	8.1867	368.907	370.212	1775.88	147.318	13.3877	65.2531	3.03556	0	0	11.6375	3.62214	2.31251	377.256
8.0-18C-R2	3	16.9	8.0881	30.5	2095.3	8.19285	355.214	356.471	1734.36	145.926	12.8908	66.0143	3.07886	0	0	11.4936	3.58791	2.29066	363.254
8.0-18C-R2	3.5	16.9	8.067	30.5	2095.3	8.17136	376.36	377.691	1748.9	140.046	13.6581	63.3852	2.93024	0	0	11.7834	3.44334	2.19836	384.878
8.0-18C-R2	4	16.8	8.08	30.5	2110.7	8.18596	364.416	365.707	1753.25	144.706	13.2637	65.0374	3.00302	0	0	11.6277	3.55746	2.2707	372.62
8.0-18C-R2	4.5	17	8.095	30.5	2127.2	8.19858	355.468	356.724	1756.66	150.269	12.8621	66.8564	3.14816	0	0	11.4431	3.69517	2.35968	363.555
8.0-18C-R2	5	17.1	8.1	30.5	2101.2	8.2023	347.657	348.884	1730.87	149.838	12.5426	67.4519	3.20409	0	0	11.3384	3.68504	2.35375	355.609
8.0-18C-R2	5.5	17.6	8.071	30.5	2101.2	8.16617	384.354	385.702	1750.87	141.82	13.6654	63.6084	3.08435	0	0	11.7214	3.49016	2.23188	393.38
8.0-18C-R2	6	17.4	8.08	30.5	2106.8	8.17798	372.924	374.235	1749.59	144.653	13.3365	64.8005	3.11277	0	0	11.6099	3.55892	2.27478	381.59
8.0-18C-R2	6.5	17.4	8.059	30.5	2106.8	8.15661	394.949	396.338	1763.95	138.837	14.1242	62.2234	2.96331	0	0	11.9012	3.41583	2.18332	404.126
8.0-18C-R2	7	17.7	8.071	30.5	2122.2	8.16488	389.907	391.273	1768.88	143.328	13.8227	63.5729	3.10294	0	0	11.7491	3.52775	2.25645	399.112
8.0-18C-R3	0	16.2	8.03	30.5	2143.7	8.14296	413.864	415.341	1815.84	133.032	15.3339	59.2245	2.57549	0	0	12.4011	3.26808	2.08316	422.894
8.0-18C-R3	0.4	17	8.052	30.5	2136	8.1548	401.551	402.97	1794.11	138.756	14.5295	61.5345	2.84628	0	0	12.0515	3.41207	2.17889	410.687
8.0-18C-R3	0.8	16.9	8.059	30.5	2134.6	8.16326	392.067	393.454	1788.22	140.549	14.2281	62.4157	2.87609	0	0	11.9522	3.4557	2.20625	400.94
8.0-18C-R3	1	16.9	8.068	30.5	2139.9	8.17244	383.522	384.879	1786.61	143.421	13.9181	63.5151	2.93752	0	0	11.833	3.52633	2.25134	392.202
8.0-18C-R3	1.5	16.8	8.079	30.5	2139.9	8.18498	370.599	371.912	1778.99	146.5	13.4888	64.9173	2.99627	0	0	11.6823	3.60157	2.29885	378.943
8.0-18C-R3	2	16.9	8.083	30.5	2139.1	8.18772	367.949	369.251	1775.43	147.627	13.3529	65.3787	3.04269	0	0	11.6242	3.62972	2.31735	376.277
8.0-18C-R3	2.5	16.8	8.087	30.5	2139.1	8.19312	362.416	363.7	1772.65	148.741	13.1909	65.9227	3.05299	0	0	11.5716	3.65667	2.33402	370.576
8.0-18C-R3	3	16.9	8.091	30.5	2099.1	8.19581	353.051	354.3	1735.57	147.026	12.8123	66.3826	3.09989	0	0	11.4598	3.61494	2.30792	361.042
8.0-18C-R3	3.5	17	8.066	30.5	2099.1	8.16902	379.668	381.009	1752.8	140.072	13.7377	63.225	2.941	0	0	11.8007	3.44443	2.19956	388.306
8.0-18C-R3	4	16.8	8.076	30.5	2128.8	8.18191	371.672	372.989	1771.57	144.861	13.5278	64.5414	2.97515	0	0	11.7083	3.56126	2.27313	380.04
8.0-18C-R3	4.5	16.9	8.096	30.5	2108.6	8.20091	349.846	351.084	1740.14	149.154	12.696	67.0218	3.13652	0	0	11.4059	3.66728	2.34133	357.764
8.0-18C-R3	5	17	8.099	30.5	2100.7	8.20262	347.08	348.306	1731.22	149.474	12.5586	67.3643	3.17753	0	0	11.3529	3.67562	2.3472	354.977
8.0-18C-R3	5.5	17.6	8.071	30.5	2100.7	8.16617	384.26	385.608	1750.45	141.785	13.6621	63.6084	3.08435	0	0	11.7207	3.48929	2.23132	393.284
8.0-18C-R3	6	17.4	8.081	30.5	2112	8.17901	372.846	374.156	1753.35	145.306	13.3337	64.9261	3.12012	0	0	11.6035	3.57499	2.28505	381.509
8.0-18C-R3	6.5	17.3	8.059	30.5	2112	8.15794	394.31	395.698	1768.49	139.155	14.1426	62.2617	2.94569	0	0	11.9109	3.42321	2.18753	403.425
8.0-18C-R3	7	17.8	8.071	30.5	2130.1	8.16357	393.02	394.395	1775.61	143.918	13.8927	63.5355	3.12151	0	0	11.758	3.54277	2.26659	402.347
8.0-18C-R4	0	16.5	8.005	28.9	2030.6	8.11376	432.789	434.328	1745.51	115.313	16.0342	52.0845	2.39063	0	0	13.0424	2.86235	1.81638	442.388
8.0-18C-R4	0.4	17.1	8.008	28.9	2044	8.10893	443.055	444.619	1755.26	117.02	16.1261	52.2118	2.49619	0	0	13	2.90734	1.84745	453.197
8.0-18C-R4	0.8	17.3	8.012	28.9	2042	8.11038	441.507	443.061	1751.05	117.921	15.9756	52.5667	2.55014	0	0	12.9295	2.93064	1.86311	451.719
8.0-18C-R4	1	16.9	8.021	28.9	2046.9	8.12486	424.922	426.425	1750.25	120.234	15.5574	53.6456	2.54308	0	0	12.8112	2.98627	1.89673	434.546
8.0-18C-R4	1.5	16.8	8.033	28.9	2046.9	8.13845	409.684	411.135	1743.08	123.131	15.0438	54.9692	2.60026	0	0	12.6322	3.05776	1.9417	418.914
8.0-18C-R4	2	17	8.033	28.9	2046.4	8.1358	412.991	414.451	1742.53	123.171	15.0761	54.9026	2.63162	0	0	12.6261	3.05968	1.9438	422.395
8.0-18C-R4	2.5	16.9	8.041	28.9	2046.4	8.14529	402.484	403.908	1737.69	125.121	14.7359	55.8095	2.66558	0	0	12.509	3.10766	1.97383	411.6
8.0-18C-R4	3	16.9	8.041	28.9	2026.6	8.14527	398.502	399.912	1720.4	123.869	14.5901	55.8068	2.66542	0	0	12.4781	3.07655	1.95408	407.528
8.0-18C-R4	3.5	17	7.96	28.9	2020.2	8.06106	495.741	497.493	1760.98	104.795	18.0968	47.4216	2.21556	0	0	13.7166	2.60321	1.65381	507.029
8.0-18C-R4	4	16.9	7.982	28.9	2021.1	8.08492	465.757	467.404	1749.88	109.646	17.0525	49.6132	2.31963	0	0	13.3734	2.7233	1.72971	476.306
8.0-18C-R4	4.5	16.9	7.975	28.9	2035	8.07776	477.884	479.575	1766.1	108.854	17.4965	48.9178	2.28171	0	0	13.5069	2.70362	1.71721	488.708
8.0-18C-R4	5	16.9	7.98	28.9	2038.9	8.08289	472.462	474.133	1766.8	110.191	17.298	49.4153	2.30882	0	0	13.4344	2.73682	1.7383	483.163
8.0-18C-R4	5.5	16.9	7.964	28.9	2040.4	8.06649	493.455	495.201	1776.92	106.714	18.0666	47.8391	2.22325	0	0	13.6905	2.65048	1.68345	504.632
8.0-18C-R4	6	17.4	7.972	28.9	2072.7	8.06819	500.996	502.757	1801.03	110.43	18.0752	48.4831	2.33501	0	0	13.5991	2.74489	1.74543	512.646
8.0-18C-R4	6.5	17.4	7.967	28.9	2072.8	8.06307	507.742	509.527	1803.89	109.309	18.3186	47.9943	2.30764	0	0	13.6785	2.71702	1.72771	519.549
8.0-18C-R5	0	16.5	8.005	28.9	2030.6	8.11376	432.789	434.328	1745.51	115.313	16.0342	52.0845	2.39063	0	0	13.0424	2.86235	1.81638	442.388
8.0-18C-R5	0.4	16.8	8.013	28.9	2039.2	8.11799	430.721	432.247	1748.27	117.815	15.8164	52.8293	2.48062	0	0	12.9242	2.92575	1.85787	440.426
8.0-18C-R5	0.8	17.2	8.014	28.9	2036.4	8.11373	436.108	437.645	1745	118.027	15.8266	52.8074	2.54685	0	0	12.8928	2.93281	1.86406	446.142
8.0-18C-R5	1	16.9	8.022	28.9	2041.5	8.12588	422.636	424.131	1744.91	120.148	15.4737	53.7515	2.54904	0	0	12.7875	2.98413	1.89538	432.208
8.0-18C-R5	1.5	16.8	8.034	28.9	2041.5	8.13946	407.476	408.92	1737.74	123.041	14.9628	55.0771	2.60635	0	0	12.6088	3.05553	1.94028	416.657
8.0-18C-R5	2	17	8.034	28.9	2049.7	8.13682	412.556	414.014	1744.81	123.623	15.0602	55.0116	2.63785	0	0	12.6162	3.07092	1.95095	421.949
8.0-18C-R5	2.5	17	8.042	28.9	2049.7	8.14499	403.731	405.157	1739.9	125.616	14.738	55.8859	2.68792	0	0	12.4966	3.12042	1.98239	412.923
8.0-18C-R5	3	17	8.042	28.9	2055.3	8.145	404.859	406.289	1744.79	125.971	14.7792	55.8867	2.68796	0	0	12.5052	3.12924	1.98799	414.077
8.0-18C-R5	3.5	17.2	7.958	28.9	2020.2	8.0564	502.483	504.254	1761.93	104.434	18.2354	47.1742	2.23187	0	0	13.7412	2.59505	1.64938	514.045
8.0-18C-R5	4	16.9	7.983	28.9	2024.3	8.08595	465.263	466.909	1752.17	110.05	17.0344	49.7138	2.32513	0	0	13.363	2.73333	1.73608	475.801
8.0-18C-R5	4.5	16.9	7.976	28.9	2035.3	8.07879	476.681	478.368	1765.82	109.093	17.4524	49.0169	2.28711	0	0	13.4916	2.70957	1.72099	487.478
8.0-18C-R5	5	16.8	7.981	28.9	2049.9	8.08524	471.847	473.518	1776.07	110.995	17.3265	49.5457	2.30043	0	0	13.44	2.75638	1.75032	482.478
8.0-18C-R5	5.5	16.9	7.959	28.9	2057.2	8.06138	504.272	506.056	1794.62	106.516	18.4626	47.3566	2.19724	0	0	13.7984	2.64556	1.68033	515.694
8.0-18C-R5	6	16.9	7.971	28.9	2061.1	8.07369	489.333	491.064	1791.54	109.391	17.9157	48.526	2.26043	0	0	13.6134	2.71697	1.72569	500.416
8.0-18C-R5	6.5	16.9	7.965	28.9	2061.2	8.06754	497.254	499.014	1794.93	108.056	18.2057	47.9386	2.22863	0	0	13.7091	2.68382	1.70463	508.517
8.0-18C-R6	0	16	8.045	29.1	2066.2	8.16133	386.278	387.66	1751.21	127.66	14.51	57.1177	2.55989	0	0	12.4471	3.16269	2.00611	394.623
8.0-18C-R6	0.4	16.8	8.03	29.1	2062.4	8.13534	415.133	416.604	1756.76	123.935	15.2271	55.1844	2.59312	0	0	12.6454	3.0739	1.95329	424.486
8.0-18C-R6	0.8	17.2	8.066	29.1	2071.5	8.16678	384.576	385.932	1741.75	133.892	13.9411	59.0789	2.89042	0	0	12.1186	3.32282	2.1134	393.424
8.0-18C-R6	1	17.3	8.04	29.1	2064.9	8.13894	413.032	414.486	1752.5	126.778	14.9288	56.1139	2.73549	0	0	12.4865	3.14675	2.00188	422.585
8.0-18C-R6	1.5	17.2	8.04	29.1	2064.9	8.14026	411.326	412.776	1752.56	126.742	14.9108	56.148	2.71921	0	0	12.4891	3.14538	2.00055	420.789
8.0-18C-R6	2	17.1	8.042	29.1	2065.4	8.14362	407.516	408.954	1751.8	127.244	14.8162	56.4035	2.71574	0	0	12.4628	3.15737	2.00771	416.843
8.0-18C-R6	2.5	16.9	8.005	29.1	2056.1	8.10845	444.508	446.081	1766.15	117.513	16.2565	52.4771	2.45961	0	0	13.0137	2.91503	1.85276	454.575
8.0-18C-R6	3	17	8.02	29.1	2059.9	8.12248	429.499	431.017	1760.53	121.391	15.6614	54.0365	2.5634	0	0	12.7872	3.01168	1.91463	439.277
8.0-18C-R6	3.5	17.3	8.049	29.1	2067.2	8.14812	403.552	404.973	1748.86	129.217	14.5862	57.1147	2.79393	0	0	12.3571	3.20731	2.04041	412.886
8.0-18C-R6	4	17.4	8.053	29.1	2068.2	8.15087	401.056	402.466	1747.14	130.348	14.4536	57.5289	2.83715	0	0	12.2975	3.23588	2.05906	410.382
8.0-18C-R6	4.5	16.9	8.035	29.1	2063.7	8.13913	411.529	412.985	1754.77	125.3	15.0504	55.6985	2.6396	0	0	12.5696	3.1082	1.97554	420.849
8.0-18C-R6	5	17	8.04	29.1	2064.9	8.14291	407.931	409.372	1752.66	126.67	14.8749	56.2161	2.68688	0	0	12.4943	3.14265	1.99789	417.218
8.0-18C-R6	5.5	17.2	8.015	29.1	2058.6	8.11473	438.649	440.195	1762.27	120.168	15.9013	53.438	2.56396	0	0	12.8556	2.98224	1.89679	448.741
8.0-18C-R6	6	17.1	8.025	29.1	2061.1	8.12626	425.759	427.262	1758.5	122.726	15.4794	54.5421	2.60932	0	0	12.7106	3.04526	1.93642	435.504
8.0-18C-R6	6.5	17.5	8.012	29.1	2057.8	8.10772	447.525	449.096	1763.19	119.503	16.0813	53.0244	2.59201	0	0	12.8914	2.9671	1.88847	457.986
8.4-18C-R1	0	16.2	8.03	30.5	2143.7	8.14296	413.864	415.341	1815.84	133.032	15.3339	59.2245	2.57549	0	0	12.4011	3.26808	2.08316	422.894
8.4-18C-R1	0.4	17	8.444	30.5	2376.3	8.55257	145.12	145.632	1620.31	313.157	5.25094	122.565	7.11277	0	0	8.27356	7.70063	4.91751	148.421
8.4-18C-R1	0.8	16.9	8.432	30.5	2376.58	8.54181	149.926	150.456	1634.89	307.218	5.44083	120.379	6.87629	0	0	8.35187	7.55363	4.82252	153.319
8.4-18C-R1	1	16.9	8.433	30.5	2353.2	8.5428	147.924	148.448	1616.75	304.501	5.36819	120.562	6.89197	0	0	8.32642	7.48682	4.77987	151.272
8.4-18C-R1	1.5	16.9	8.42	30.5	2373.2	8.52967	155.283	155.832	1646.61	300.885	5.63524	118.141	6.68663	0	0	8.42911	7.3979	4.7231	158.798
8.4-18C-R1	2	16.9	8.423	30.5	2328.3	8.53266	150.817	151.351	1610.31	296.286	5.47316	118.691	6.73286	0	0	8.37183	7.28485	4.65092	154.23
8.4-18C-R1	2.5	16.9	8.426	30.5	2338.3	8.53571	150.118	150.649	1614.12	299.077	5.44778	119.251	6.78024	0	0	8.36018	7.35347	4.69473	153.515
8.4-18C-R1	3	16.9	8.436	30.5	2363.7	8.54585	147.259	147.78	1620.81	307.414	5.34406	121.127	6.94048	0	0	8.31547	7.55846	4.82561	150.592
8.4-18C-R1	3.5	16.9	8.452	30.5	2383.7	8.56206	141.445	141.945	1616.02	318.163	5.13304	124.155	7.20445	0	0	8.23036	7.82274	4.99433	144.646
8.4-18C-R1	4	16.8	8.431	30.5	2345.2	8.54216	147.662	148.186	1613.34	302.395	5.3745	120.256	6.81971	0	0	8.33382	7.43409	4.74512	150.987
8.4-18C-R1	4.5	17	8.471	30.5	2356.4	8.57987	132.335	132.802	1573.44	323.834	4.78833	127.715	7.57435	0	0	8.09442	7.96319	5.08517	135.346
8.4-18C-R1	5	17.1	8.47	30.5	2364.1	8.57747	133.78	134.252	1580.07	324.491	4.82644	127.45	7.60108	0	0	8.10538	7.98037	5.09732	136.84
8.4-18C-R1	5.5	17.7	8.452	30.5	2364.1	8.55093	145.137	145.645	1601.63	315.676	5.14527	123.574	7.54781	0	0	8.2077	7.76979	4.96978	148.563
8.4-18C-R1	6	17.6	8.452	30.5	2353.1	8.5523	143.806	144.311	1593.79	314.081	5.11294	123.645	7.504	0	0	8.19982	7.72949	4.94283	147.183
8.4-18C-R1	6.5	17.9	8.42	30.5	2353.1	8.51581	160.655	161.216	1631.46	298.557	5.66249	117.442	7.08765	0	0	8.4035	7.35047	4.70379	164.488
8.4-18C-R1	7	17.9	8.383	30.5	2402	8.47846	183.551	184.193	1710.37	287.204	6.46951	110.722	6.50357	0	0	8.70829	7.07096	4.52493	187.931
8.4-18C-R2	0	16.2	8.03	30.5	2143.7	8.14296	413.864	415.341	1815.84	133.032	15.3339	59.2245	2.57549	0	0	12.4011	3.26808	2.08316	422.894
8.4-18C-R2	0.4	17	8.45	30.5	2386.1	8.55865	143.086	143.591	1620.12	317.535	5.17734	123.703	7.21304	0	0	8.24373	7.80828	4.98625	146.341
8.4-18C-R2	0.8	16.9	8.439	30.5	2386.7	8.54891	147.404	147.925	1633.86	312.079	5.3493	121.695	6.98952	0	0	8.31455	7.67315	4.89883	150.74
8.4-18C-R2	1	16.9	8.444	30.5	2384.4	8.55397	145.013	145.526	1626.19	314.253	5.26253	122.638	7.0714	0	0	8.28087	7.72659	4.93295	148.295
8.4-18C-R2	1.5	16.9	8.431	30.5	2384.4	8.54081	150.904	151.438	1641.76	307.795	5.47633	120.193	6.86039	0	0	8.3647	7.56782	4.83158	154.32
8.4-18C-R2	2	16.9	8.442	30.5	2421.4	8.55198	148.285	148.81	1655.28	318.411	5.38127	122.266	7.03906	0	0	8.3225	7.82883	4.99822	151.641
8.4-18C-R2	2.5	16.9	8.436	30.5	2421.4	8.5459	151.036	151.57	1662.58	315.375	5.48111	121.137	6.94132	0	0	8.36118	7.75418	4.95056	154.454
8.4-18C-R2	3	16.8	8.447	30.5	2321.8	8.55834	139.115	139.608	1577.62	306.919	5.06339	123.267	7.07846	0	0	8.21248	7.54533	4.81612	142.247
8.4-18C-R2	3.5	16.9	8.455	30.5	2331.8	8.56505	136.932	137.416	1575.27	312.283	4.96927	124.717	7.25422	0	0	8.17058	7.67815	4.90202	140.031
8.4-18C-R2	4	16.8	8.431	30.5	2337.4	8.54216	147.147	147.668	1607.67	301.328	5.35572	120.255	6.81959	0	0	8.32739	7.40786	4.72838	150.459
8.4-18C-R2	4.5	17	8.478	30.5	2358.6	8.58696	129.613	130.071	1566.44	327.697	4.68987	129.067	7.69896	0	0	8.05606	8.05818	5.14583	132.562
8.4-18C-R2	5	17	8.479	30.5	2356.9	8.58797	129.112	129.568	1564.02	327.953	4.67172	129.261	7.71691	0	0	8.04908	8.06447	5.14985	132.05
8.4-18C-R2	5.5	17.6	8.451	30.5	2356.9	8.5513	144.495	145.002	1597.71	314.124	5.13742	123.456	7.48661	0	0	8.20901	7.73054	4.94351	147.888
8.4-18C-R2	6	17.5	8.455	30.5	2324.5	8.5567	140.055	140.547	1569.79	311.46	4.99407	124.282	7.51245	0	0	8.15928	7.66393	4.89976	143.326
8.4-18C-R2	6.5	17.2	8.416	30.5	2324.5	8.52141	155.799	156.348	1615.46	292.56	5.60437	117.184	6.74124	0	0	8.41319	7.19601	4.59738	159.381
8.4-18C-R2	7	17.9	8.384	30.5	2383	8.47945	181.489	182.123	1695.03	285.28	6.39682	110.899	6.51847	0	0	8.68494	7.02359	4.49461	185.819
8.4-18C-R3	0	16.2	8.03	30.5	2143.7	8.14296	413.864	415.341	1815.84	133.032	15.3339	59.2245	2.57549	0	0	12.4011	3.26808	2.08316	422.894
8.4-18C-R3	0.4	17	8.469	30.5	2365.4	8.57786	133.695	134.167	1582.25	324.139	4.83755	127.331	7.53926	0	0	8.11311	7.97068	5.08996	136.737
8.4-18C-R3	0.8	16.9	8.453	30.5	2363.2	8.56306	139.734	140.228	1600.13	315.757	5.07095	124.342	7.22096	0	0	8.20801	7.76357	4.95656	142.896
8.4-18C-R3	1	16.9	8.452	30.5	2360.7	8.56204	140.009	140.505	1599.54	314.904	5.08095	124.151	7.2041	0	0	8.21216	7.7426	4.94317	143.178
8.4-18C-R3	1.5	16.9	8.444	30.5	2360.7	8.55394	143.498	144.006	1609.12	310.939	5.20756	122.634	7.07105	0	0	8.26199	7.64512	4.88093	146.746
8.4-18C-R3	2	17	8.448	30.5	2403.4	8.55664	145.066	145.579	1634.96	318.966	5.249	123.326	7.17976	0	0	8.26972	7.84348	5.00873	148.367
8.4-18C-R3	2.5	17	8.443	30.5	2403.4	8.55158	147.311	147.832	1641.04	316.443	5.33024	122.381	7.09661	0	0	8.30126	7.78144	4.96911	150.663
8.4-18C-R3	3	17	8.455	30.5	2366.5	8.56369	139.68	140.174	1600.03	317.261	5.05413	124.65	7.29729	0	0	8.19751	7.80155	4.98195	142.858
8.4-18C-R3	3.5	17	8.448	30.5	2356.5	8.5566	142.091	142.593	1601.28	312.364	5.14134	123.319	7.17908	0	0	8.23267	7.68113	4.90506	145.324
8.4-18C-R3	4	16.9	8.427	30.5	2333	8.53671	149.304	149.832	1609.09	298.839	5.41824	119.436	6.79598	0	0	8.34915	7.3476	4.69099	152.683
8.4-18C-R3	4.5	17	8.475	30.5	2370.7	8.58393	131.537	132.002	1578.65	327.958	4.75947	128.489	7.64551	0	0	8.08255	8.0646	5.14993	134.53
8.4-18C-R3	5	17.1	8.47	30.5	2366.4	8.57748	133.917	134.39	1581.7	324.827	4.83139	127.45	7.60111	0	0	8.10718	7.98862	5.10259	136.98
8.4-18C-R3	5.5	17.7	8.451	30.5	2366.5	8.54992	145.74	146.25	1604.55	315.518	5.16665	123.385	7.5303	0	0	8.21577	7.76591	4.96729	149.18
8.4-18C-R3	6	17.6	8.465	30.5	2341.4	8.56544	137.424	137.906	1569.83	318.86	4.88601	126.12	7.73446	0	0	8.11221	7.84709	5.01803	140.651
8.4-18C-R3	6.5	17.3	8.424	30.5	2341.4	8.52814	153.872	154.413	1618.53	298.685	5.51887	118.599	6.90849	0	0	8.37245	7.34762	4.69534	157.428
8.4-18C-R3	7	17	8.393	30.5	2399.5	8.50099	171.198	171.803	1697.42	291.322	6.19454	113.126	6.31623	0	0	8.64032	7.16369	4.57463	175.093
8.4-18C-R4	0	16.5	8.005	28.9	2030.6	8.11376	432.789	434.328	1745.51	115.313	16.0342	52.0845	2.39063	0	0	13.0424	2.86235	1.81638	442.388
8.4-18C-R4	0.4	17.1	8.423	28.9	2291	8.53051	153.76	154.302	1608.07	283.013	5.59645	110.315	6.58958	0	0	8.55898	7.03139	4.46804	157.279
8.4-18C-R4	0.8	17.2	8.427	28.9	2291.5	8.53316	152.6	153.138	1603.92	284.969	5.53796	110.947	6.69005	0	0	8.53014	7.08109	4.50066	156.112
8.4-18C-R4	1	17	8.438	28.9	2305	8.5471	147.227	147.747	1601.51	291.847	5.37447	113.017	6.7846	0	0	8.46711	7.24977	4.60576	150.579
8.4-18C-R4	1.5	16.9	8.44	28.9	2315	8.55053	146.366	146.884	1606.58	294.103	5.35882	113.44	6.77688	0	0	8.46272	7.30468	4.63958	149.681
8.4-18C-R4	2	17	8.439	28.9	2334.3	8.54814	148.736	149.262	1621.8	296.253	5.42956	113.199	6.80085	0	0	8.48447	7.35921	4.67528	152.123
8.4-18C-R4	2.5	17	8.404	28.9	2334.3	8.51272	165.323	165.907	1661.47	279.731	6.03506	107.099	6.26821	0	0	8.73602	6.94878	4.41454	169.087
8.4-18C-R4	3	17	8.407	28.9	2345	8.51576	164.625	165.207	1666.11	282.484	6.00959	107.617	6.31232	0	0	8.72249	7.01719	4.458	168.374
8.4-18C-R4	3.5	17	8.391	28.9	2324	8.49955	171.093	171.698	1668.12	272.463	6.2457	104.878	6.08103	0	0	8.82695	6.76824	4.29984	174.989
8.4-18C-R4	4	16.9	8.384	28.9	2305.4	8.49384	172.503	173.113	1661.75	266.975	6.31573	103.754	5.94756	0	0	8.86677	6.63091	4.21164	176.41
8.4-18C-R4	4.5	17	8.411	28.9	2292.9	8.51976	158.881	159.443	1622.84	277.695	5.79991	108.298	6.37071	0	0	8.64846	6.8982	4.38241	162.499
8.4-18C-R4	5	16.9	8.362	28.9	2303.1	8.47157	183.954	184.605	1683.48	256.946	6.73499	100.08	5.65025	0	0	9.04423	6.38182	4.05342	188.12
8.4-18C-R4	5.5	17	8.41	28.9	2283	8.51874	158.641	159.201	1616.58	275.972	5.79113	108.124	6.35573	0	0	8.64724	6.85542	4.35522	162.253
8.4-18C-R4	6	17.5	8.418	28.9	2332.3	8.51991	161.807	162.375	1644.06	286.194	5.82076	109.187	6.66678	0	0	8.62599	7.11488	4.52528	165.59
8.4-18C-R4	6.5	17.6	8.43	28.9	2332.4	8.53066	156.724	157.274	1630.47	291.914	5.62148	111.211	6.89545	0	0	8.53955	7.25824	4.61754	160.407
8.4-18C-R5	0	16.5	8.005	28.9	2030.6	8.11376	432.789	434.328	1745.51	115.313	16.0342	52.0845	2.39063	0	0	13.0424	2.86235	1.81638	442.388
8.4-18C-R5	0.4	17	8.421	28.9	2267.9	8.52986	152.401	152.939	1593.26	279.045	5.56334	110.029	6.52054	0	0	8.55426	6.93174	4.40371	155.871
8.4-18C-R5	0.8	17.2	8.426	28.9	2276.6	8.53214	152.021	152.556	1594.06	282.549	5.51693	110.77	6.67427	0	0	8.52443	7.02094	4.46243	155.519
8.4-18C-R5	1	17	8.434	28.9	2281.4	8.54303	147.428	147.949	1588.73	286.82	5.38181	112.308	6.72132	0	0	8.47467	7.12487	4.52641	150.785
8.4-18C-R5	1.5	16.9	8.444	28.9	2291.4	8.55456	143.048	143.554	1584.79	292.816	5.23732	114.146	6.84003	0	0	8.41606	7.27272	4.61928	146.288
8.4-18C-R5	2	17.1	8.439	28.9	2354.5	8.54676	150.735	151.267	1636.53	299	5.48635	113.134	6.84077	0	0	8.49993	7.42858	4.72044	154.185
8.4-18C-R5	2.5	17	8.453	28.9	2354.5	8.56232	143.815	144.323	1620.21	305.789	5.24992	115.69	7.02666	0	0	8.40686	7.5961	4.82578	147.09
8.4-18C-R5	3	17.1	8.389	28.9	2325.6	8.49614	172.984	173.595	1671.47	271.786	6.29617	104.476	6.08816	0	0	8.843	6.75246	4.2908	176.944
8.4-18C-R5	3.5	17.1	8.387	28.9	2285.1	8.49407	170.858	171.461	1643.1	265.906	6.2188	104.131	6.0593	0	0	8.82316	6.60639	4.19798	174.769
8.4-18C-R5	4	16.9	8.388	28.9	2285.4	8.49787	168.914	169.511	1642.34	266.316	6.18434	104.427	6.00298	0	0	8.81755	6.61453	4.20123	172.74
8.4-18C-R5	4.5	17	8.411	28.9	2279.1	8.51975	157.881	158.439	1612.58	275.929	5.76339	108.296	6.37051	0	0	8.63647	6.85435	4.35455	161.476
8.4-18C-R5	5	16.9	8.373	28.9	2276.5	8.48267	175.912	176.535	1651.59	258.608	6.44057	101.903	5.79661	0	0	8.92925	6.4231	4.07964	179.897
8.4-18C-R5	5.5	17	8.408	28.9	2294.6	8.51673	160.446	161.013	1627.42	276.538	5.85704	107.781	6.32635	0	0	8.67211	6.86948	4.36416	164.1
8.4-18C-R5	6	17.1	8.428	28.9	2316	8.53559	153.182	153.722	1620.89	288.627	5.57542	111.193	6.66716	0	0	8.54472	7.17086	4.55667	156.688
8.4-18C-R5	6.5	17.1	8.331	28.9	2316.1	8.43743	204.439	205.16	1725.63	245.116	7.44104	94.9188	5.31839	0	0	9.32458	6.08985	3.86975	209.118
8.4-18C-R6	0	16	8.045	29.1	2098.4	8.16138	392.427	393.831	1779.28	129.721	14.741	57.1229	2.56017	0	0	12.4957	3.21375	2.0385	400.906
8.4-18C-R6	0.4	17.3	8.473	29.1	2334.8	8.57826	135.319	135.795	1578.91	314.099	4.89104	120.169	7.52245	0	0	8.2354	7.79627	4.95978	138.449
8.4-18C-R6	0.8	16.9	8.44	29.1	2308.5	8.55044	145.416	145.93	1598.62	294.299	5.31813	114.484	6.80538	0	0	8.42981	7.3004	4.64006	148.709
8.4-18C-R6	1	17.2	8.461	29.1	2334.2	8.56752	139.764	140.257	1592.73	308.071	5.06655	118.057	7.27281	0	0	8.31062	7.64547	4.86272	142.98
8.4-18C-R6	1.5	17	8.44	29.1	2308.5	8.54904	146.045	146.561	1598.57	294.335	5.32543	114.416	6.84513	0	0	8.42889	7.30237	4.64237	149.37
8.4-18C-R6	2	17.4	8.448	29.1	2310.7	8.55155	145.149	145.659	1590.81	298.591	5.23102	115.573	7.13779	0	0	8.37371	7.41248	4.71672	148.524
8.4-18C-R6	2.5	16.9	8.458	29.1	2313.4	8.56867	137.936	138.424	1581.38	303.603	5.04459	117.72	7.09704	0	0	8.31569	7.5312	4.78675	141.06
8.4-18C-R6	3	17.3	8.416	29.1	2312.1	8.52058	159.372	159.933	1628.28	283.631	5.76041	109.979	6.58684	0	0	8.59651	7.04002	4.47867	163.058
8.4-18C-R6	3.5	17.1	8.47	29.1	2316.7	8.57801	134.296	134.77	1569.6	309.978	4.88262	119.76	7.38372	0	0	8.24122	7.69163	4.89096	137.369
8.4-18C-R6	4	17.7	8.442	29.1	2359.1	8.54134	153.044	153.58	1632.86	302.387	5.46751	114.302	7.16254	0	0	8.45017	7.51027	4.78229	156.66
8.4-18C-R6	4.5	16.8	8.439	29.1	2338.2	8.55086	147.19	147.711	1621.49	297.79	5.39893	114.379	6.7505	0	0	8.46195	7.38592	4.69334	150.506
8.4-18C-R6	5	16.8	8.421	29.1	2303.4	8.5326	153.032	153.574	1616.45	284.645	5.61321	111.185	6.47263	0	0	8.55802	7.05989	4.48617	156.479
8.4-18C-R6	5.5	17	8.431	29.1	2306.1	8.53993	149.934	150.464	1607.07	289.757	5.46724	112.816	6.70303	0	0	8.48831	7.1888	4.57017	153.347
8.4-18C-R6	6	17.1	8.437	29.1	2307.7	8.54461	147.968	148.49	1601.37	292.84	5.37971	113.814	6.8371	0	0	8.44758	7.26638	4.62055	151.355
8.4-18C-R6	6.5	17.6	8.423	29.1	2303.9	8.52348	157.474	158.026	1614.23	285.93	5.64217	111.003	6.81243	0	0	8.5367	7.1004	4.52024	161.175
Exp with CRUSHED algae cells 6 replicats
	day	temp	pH	S	TA	pH out	fCO2 out (matm)	pCO2 out (matm)	HCO3 out (mmol/kgSW)	CO3 out (mmol/kgSW)	CO2 out (mmol/kgSW)	B Alk out (mmol/kgSW)	OH out (mmol/kgSW)	P Alk out (mmol/kgSW)	Si Alk out (mmol/kgSW)	Revelle out	WCa out	WAr out	xCO2 out (dry at 1 atm) (ppm)
7.6-15C-R1	0	15.8	8.027	31.8	2066.88	8.1446	389.227	390.624	1739.78	130.963	14.4894	62.6161	2.56087	0	0	12.0024	3.18952	2.03858	390.624
7.6-15C-R1	0.4	14.8	7.615	31.8	2083.13	7.72798	1124.05	1128.13	1947.51	54.3006	43.1282	26.1461	0.894822	0	0	17.8507	1.3213	0.842676	1128.13
7.6-15C-R1	0.8	14.4	7.62	31.8	2086.19	7.73801	1094.17	1098.17	1949.12	54.8637	42.499	26.4799	0.882377	0	0	17.8561	1.33458	0.850428	1098.17
7.6-15C-R1	1	14.1	7.62	31.8	2087.83	7.74156	1082.45	1086.42	1950.88	54.7998	42.4339	26.5056	0.865114	0	0	17.8865	1.33272	0.848716	1086.42
7.6-15C-R1	1.5	13.8	7.605	31.8	2096.86	7.72907	1117.79	1121.91	1964.3	53.0638	44.2281	25.6337	0.817352	0	0	18.0363	1.29023	0.821148	1121.91
7.6-15C-R1	2	14.2	7.597	31.8	2103.28	7.7158	1162.73	1166.99	1972.55	52.3956	45.4405	25.136	0.822915	0	0	18.0587	1.27435	0.811709	1166.99
7.6-15C-R1	2.5	13.7	7.607	31.8	2107.76	7.73239	1113.5	1117.6	1974.1	53.5539	44.1952	25.7597	0.81596	0	0	18.0506	1.30206	0.828506	1117.6
7.6-15C-R1	3	13.7	7.61	31.8	2118.28	7.73561	1110.35	1114.44	1983.14	54.1991	44.0704	25.9379	0.822021	0	0	18.0477	1.31774	0.838487	1114.44
7.6-15C-R1	3.5	13.8	7.622	31.8	2079.82	7.74727	1060.22	1064.12	1942.87	54.7313	41.95	26.6534	0.852336	0	0	17.8847	1.33077	0.846952	1064.12
7.6-15C-R1	4	14.2	7.606	31.8	2094.85	7.72542	1131.05	1135.19	1961.81	53.278	44.2026	25.661	0.841356	0	0	17.9887	1.29581	0.825379	1135.19
7.6-15C-R1	4.5	14.5	7.615	31.8	2084.77	7.7315	1112.08	1116.14	1949.27	54.2361	43.0623	26.1708	0.877362	0	0	17.8815	1.31941	0.840941	1116.14
7.6-15C-R1	5	14.2	7.603	31.8	2094.33	7.72222	1139.68	1143.85	1962.23	52.8974	44.5397	25.4849	0.835167	0	0	18.0073	1.28655	0.819483	1143.85
7.6-15C-R1	5.5	14.5	7.623	31.8	2070.69	7.74003	1081.6	1085.54	1933.44	54.8625	41.8818	26.6533	0.894763	0	0	17.7971	1.33465	0.850654	1085.54
7.6-15C-R1	6	14.4	7.611	31.8	2079.15	7.72841	1116.41	1120.49	1945.25	53.5577	43.3627	25.9407	0.863086	0	0	17.9097	1.30281	0.830184	1120.49
7.6-15C-R1	6.5	14.3	7.599	31.8	2097.61	7.71677	1157.92	1162.16	1966.49	52.5304	45.1136	25.2443	0.832469	0	0	18.0279	1.27772	0.814027	1162.16
7.6-15C-R2	0	15.8	8.027	31.8	2066.88	8.1446	389.227	390.624	1739.78	130.963	14.4894	62.6161	2.56087	0	0	12.0024	3.18952	2.03858	390.624
7.6-15C-R2	0.4	14.9	7.596	31.8	2077.54	7.70658	1182.44	1186.73	1947.92	51.8766	45.2306	25.0273	0.85972	0	0	17.9548	1.26242	0.805297	1186.73
7.6-15C-R2	0.8	14.4	7.622	31.8	2076.54	7.74015	1083.35	1087.31	1939.35	54.8578	42.0788	26.6011	0.886723	0	0	17.8242	1.33443	0.850335	1087.31
7.6-15C-R2	1	14.2	7.626	31.8	2088.33	7.74678	1069.95	1073.86	1949.38	55.6095	41.8145	26.8627	0.883774	0	0	17.8311	1.35251	0.861499	1073.86
7.6-15C-R2	1.5	13.9	7.617	31.8	2080	7.74073	1078.48	1082.45	1944.54	54.145	42.5406	26.3413	0.847486	0	0	17.9142	1.31661	0.838109	1082.45
7.6-15C-R2	2	14.3	7.628	31.8	2078.13	7.74773	1063.19	1067.08	1939.03	55.6244	41.4226	26.9765	0.893985	0	0	17.7882	1.35298	0.861973	1067.08
7.6-15C-R2	2.5	13.8	7.627	31.8	2080.69	7.75262	1046.84	1050.69	1942.11	55.3876	41.4206	26.96	0.862894	0	0	17.846	1.34673	0.857108	1050.69
7.6-15C-R2	3	13.9	7.617	31.8	2078.41	7.74073	1077.64	1081.6	1943.03	54.103	42.5075	26.3413	0.847487	0	0	17.9114	1.31559	0.837459	1081.6
7.6-15C-R2	3.5	13.9	7.621	31.8	2079.1	7.74501	1066.76	1070.68	1942.44	54.6218	42.0781	26.5837	0.855875	0	0	17.8821	1.3282	0.84549	1070.68
7.6-15C-R2	4	14.3	7.605	31.8	2084.13	7.72318	1132.47	1136.61	1951.88	52.9157	44.1219	25.5944	0.844854	0	0	17.9679	1.28709	0.819998	1136.61
7.6-15C-R2	4.5	14.6	7.621	31.8	2085.27	7.73672	1099.25	1103.26	1947.8	55.0371	42.4353	26.5233	0.896245	0	0	17.8285	1.339	0.853607	1103.26
7.6-15C-R2	5	14.4	7.622	31.8	2086.54	7.74015	1088.64	1092.62	1948.82	55.1254	42.2842	26.6011	0.886722	0	0	17.8414	1.34094	0.854484	1092.62
7.6-15C-R2	5.5	14.5	7.62	31.8	2090.17	7.73683	1100.52	1104.53	1952.82	55.0057	42.6144	26.4713	0.888195	0	0	17.8537	1.33813	0.852873	1104.53
7.6-15C-R2	6	14.5	7.604	31.8	2077.38	7.71977	1140.41	1144.57	1945.65	52.6923	44.1592	25.5204	0.853977	0	0	17.9441	1.28186	0.817004	1144.57
7.6-15C-R2	6.5	14.5	7.588	31.8	2064.6	7.70269	1181.65	1185.96	1938.26	50.468	45.7562	24.6003	0.821043	0	0	18.0157	1.22774	0.782515	1185.96
7.6-15C-R3	0	16.3	8.051	31.9	2100	8.16251	377.865	379.212	1751.29	140.098	13.8505	65.726	2.79929	0	0	11.6792	3.41145	2.18342	379.212
7.6-15C-R3	0.4	14.4	7.633	31.9	2112.66	7.75187	1070.11	1074.02	1969.57	57.3982	41.541	27.4053	0.912846	0	0	17.7705	1.39536	0.889388	1074.02
7.6-15C-R3	0.8	13.5	7.6	31.9	2117.85	7.72725	1129.77	1133.95	1985.56	53.0164	45.0958	25.4837	0.792996	0	0	18.1069	1.28803	0.819458	1133.95
7.6-15C-R3	1	14.2	7.623	31.9	2144.32	7.74358	1106.61	1110.66	2002.9	56.8765	43.223	26.8053	0.879069	0	0	17.9234	1.38248	0.880807	1110.66
7.6-15C-R3	1.5	13.6	7.594	31.9	2151.27	7.71962	1170.57	1174.89	2019.07	53.1549	46.5789	25.1255	0.786531	0	0	18.1871	1.29148	0.821819	1174.89
7.6-15C-R3	2	13.8	7.608	31.9	2160.61	7.73228	1142.08	1146.28	2023.42	55.2219	45.1636	25.9329	0.82509	0	0	18.0962	1.34188	0.854238	1146.28
7.6-15C-R3	2.5	13.6	7.62	31.9	2172.11	7.74751	1104.05	1108.12	2030.61	57.0039	43.9318	26.6744	0.83869	0	0	18.0473	1.385	0.881327	1108.12
7.6-15C-R3	3	13.6	7.609	31.9	2175.46	7.73572	1138.19	1142.39	2037.34	55.6606	45.2905	26.0089	0.816223	0	0	18.132	1.35236	0.860559	1142.39
7.6-15C-R3	3.5	14	7.631	31.9	2150.28	7.7545	1078.3	1082.26	2006.06	58.0191	42.3782	27.3177	0.884801	0	0	17.8867	1.41005	0.898001	1082.26
7.6-15C-R3	4	13.5	7.62	31.9	2126.63	7.74871	1076.43	1080.41	1987.61	55.7589	42.9668	26.6833	0.833153	0	0	17.9816	1.35466	0.861848	1080.41
7.6-15C-R3	4.5	13.7	7.634	31.9	2144.05	7.7613	1054.32	1058.21	1999.39	58.1375	41.823	27.5337	0.873898	0	0	17.8778	1.41263	0.899096	1058.21
7.6-15C-R3	5	13.8	7.651	31.9	2150.66	7.77826	1015.34	1019.08	1999.81	60.6732	40.1518	28.6107	0.917245	0	0	17.7233	1.47435	0.938565	1019.08
7.6-15C-R3	5.5	14.1	7.641	31.9	2135.66	7.76398	1047.2	1051.04	1988.85	58.9916	41.0289	27.9375	0.912796	0	0	17.7659	1.43378	0.913306	1051.04
7.6-15C-R3	6	14.1	7.641	31.9	2155.66	7.76398	1057.14	1061.01	2007.73	59.5518	41.4183	27.9376	0.912799	0	0	17.7994	1.4474	0.921979	1061.01
7.6-15C-R3	6.5	14.1	7.641	31.9	2135.66	7.76398	1047.2	1051.04	1988.85	58.9916	41.0289	27.9375	0.912796	0	0	17.7659	1.43378	0.913306	1051.04
7.6-15C-R4	0	16.3	8.051	31.9	2100	8.16251	377.865	379.212	1751.29	140.098	13.8505	65.726	2.79929	0	0	11.6792	3.41145	2.18342	379.212
7.6-15C-R4	0.4	14.5	7.661	31.9	2111.97	7.78046	997.932	1001.57	1959.42	61.1961	38.6205	29.1905	0.984063	0	0	17.4964	1.48781	0.948509	1001.57
7.6-15C-R4	0.8	13.6	7.622	31.9	2120.08	7.74965	1071.6	1075.56	1980.7	55.8782	42.6409	26.7972	0.842843	0	0	17.9459	1.35765	0.863924	1075.56
7.6-15C-R4	1	14.3	7.612	31.9	2138.5	7.73065	1140.21	1144.38	2000.85	55.3404	44.3984	26.131	0.861269	0	0	17.9859	1.34524	0.85726	1144.38
7.6-15C-R4	1.5	13.7	7.6	31.9	2160	7.72488	1161.49	1165.77	2025.43	54.1575	46.0739	25.4678	0.803604	0	0	18.1561	1.31593	0.837545	1165.77
7.6-15C-R4	2	13.9	7.608	31.9	2166	7.73109	1149.39	1153.62	2028.46	55.3983	45.312	25.9248	0.830573	0	0	18.0954	1.34626	0.8572	1153.62
7.6-15C-R4	2.5	13.6	7.628	31.9	2171.13	7.75608	1080.57	1084.56	2027.05	58.0379	42.9978	27.1679	0.855404	0	0	17.9823	1.41012	0.897314	1084.56
7.6-15C-R4	3	13.8	7.641	31.9	2172.31	7.76758	1053.02	1056.9	2023.65	59.9056	41.6418	27.9672	0.894971	0	0	17.8537	1.45569	0.926691	1056.9
7.6-15C-R4	3.5	14.1	7.641	31.9	2130.66	7.76398	1044.72	1048.54	1984.13	58.8516	40.9315	27.9376	0.912796	0	0	17.7574	1.43038	0.911139	1048.54
7.6-15C-R4	4	13.6	7.658	31.9	2126.37	7.78815	977.7	981.307	1974.63	60.8703	38.9043	29.0902	0.920964	0	0	17.6286	1.47894	0.941105	981.307
7.6-15C-R4	4.5	13.8	7.639	31.9	2138.96	7.76544	1042.11	1045.94	1992.84	58.7036	41.2102	27.8399	0.890574	0	0	17.8162	1.42649	0.908097	1045.94
7.6-15C-R4	5	13.9	7.643	31.9	2152.11	7.76852	1041.69	1045.52	2003.83	59.6505	41.0662	28.0848	0.905318	0	0	17.7929	1.44959	0.922997	1045.52
7.6-15C-R4	5.5	14.2	7.645	31.9	2117.81	7.76704	1031.49	1035.27	1970.59	59.0655	40.2891	28.1827	0.927869	0	0	17.6898	1.43568	0.914706	1035.27
7.6-15C-R4	6	14.2	7.645	31.9	2117.81	7.76704	1031.49	1035.27	1970.59	59.0655	40.2891	28.1827	0.927869	0	0	17.6898	1.43568	0.914706	1035.27
7.6-15C-R4	6.5	14.2	7.645	31.9	2117.81	7.76704	1031.49	1035.27	1970.59	59.0655	40.2891	28.1827	0.927869	0	0	17.6898	1.43568	0.914706	1035.27
7.6-15C-R5	0	16.5	7.987	31.1	2120.1	8.09478	462.099	463.742	1817.06	122.423	16.9127	55.8097	2.39904	0	0	12.8403	2.99708	1.91501	463.742
7.6-15C-R5	0.4	14.6	7.605	31.1	2136.59	7.71962	1183.01	1187.32	2004.28	53.3773	45.8484	24.7283	0.849313	0	0	18.1954	1.30424	0.829899	1187.32
7.6-15C-R5	0.8	14.5	7.611	31.1	2149.86	7.72719	1167.48	1171.74	2015.1	54.4236	45.3853	25.0783	0.856276	0	0	18.1897	1.32969	0.845915	1171.74
7.6-15C-R5	1	14.4	7.629	31.1	2150.07	7.74759	1109.64	1113.69	2009.67	56.6923	43.2695	26.1406	0.889145	0	0	18.0732	1.385	0.880916	1113.69
7.6-15C-R5	1.5	14.3	7.637	31.1	2160.49	7.75731	1087.77	1091.74	2017	57.9887	42.5472	26.6309	0.900864	0	0	18.0356	1.41655	0.900794	1091.74
7.6-15C-R5	2	14.6	7.627	31.1	2157.15	7.74308	1127.84	1131.95	2016.88	56.6944	43.7101	26.0044	0.896459	0	0	18.081	1.38529	0.881473	1131.95
7.6-15C-R5	2.5	14.4	7.589	31.1	2161.67	7.70485	1238.65	1243.18	2033.08	51.9773	48.3002	23.8488	0.805812	0	0	18.3377	1.26981	0.807651	1243.18
7.6-15C-R5	3	14.8	7.66	31.1	2161.67	7.77581	1044.84	1048.63	2010.01	61.3403	40.2465	28.0083	0.984693	0	0	17.7847	1.49908	0.954282	1048.63
7.6-15C-R5	3.5	14.4	7.597	31.1	2141.43	7.71341	1201.55	1205.94	2011.44	52.448	46.8534	24.2924	0.821856	0	0	18.2672	1.28131	0.814966	1205.94
7.6-15C-R5	4	14.5	7.609	31.1	2150.93	7.72506	1174.18	1178.47	2016.73	54.2004	45.6459	24.9636	0.852075	0	0	18.2038	1.32424	0.842446	1178.47
7.6-15C-R5	4.5	14.4	7.64	31.1	2142.46	7.75932	1074.28	1078.2	1998.89	57.9319	41.8905	26.8043	0.913487	0	0	17.9716	1.41528	0.900177	1078.2
7.6-15C-R5	5	14.5	7.655	31.1	2152.46	7.77409	1041.82	1045.62	2003.25	60.2732	40.5002	27.7234	0.953919	0	0	17.8443	1.47261	0.936836	1045.62
7.6-15C-R5	5.5	14.4	7.619	31.1	2146.88	7.73691	1137.34	1141.5	2009.84	55.3207	44.3497	25.5499	0.867561	0	0	18.1414	1.35149	0.859603	1141.5
7.6-15C-R5	6	14.6	7.637	31.1	2148.85	7.75374	1094.45	1098.44	2005.78	57.7829	42.4161	26.6038	0.918726	0	0	17.9888	1.41189	0.898397	1098.44
7.6-15C-R5	6.5	14.8	7.655	31.1	2150.82	7.7705	1053.21	1057.03	2001.49	60.338	40.5689	27.6935	0.972727	0	0	17.8146	1.47459	0.93869	1057.03
7.6-15C-R6	0	16.5	7.987	31.1	2120.1	8.09478	462.099	463.742	1817.06	122.423	16.9127	55.8097	2.39904	0	0	12.8403	2.99708	1.91501	463.742
7.6-15C-R6	0.4	14.6	7.596	31.1	2141.87	7.71001	1214.15	1218.58	2012.02	52.4105	47.0553	24.2226	0.830723	0	0	18.2533	1.28062	0.814867	1218.58
7.6-15C-R6	0.8	14.7	7.59	31.1	2128.38	7.70244	1230.09	1234.57	2000.9	51.3959	47.5273	23.8841	0.823977	0	0	18.2517	1.25594	0.799333	1234.57
7.6-15C-R6	1	14.4	7.597	31.1	2141.43	7.71341	1201.55	1205.94	2011.44	52.448	46.8534	24.2924	0.821856	0	0	18.2672	1.28131	0.814966	1205.94
7.6-15C-R6	1.5	14.3	7.606	31.1	2129.89	7.72421	1162.76	1167.01	1997.83	53.2219	45.4807	24.8076	0.834747	0	0	18.208	1.3001	0.826748	1167.01
7.6-15C-R6	2	14.7	7.611	31.1	2138.94	7.72485	1170.39	1174.65	2004.59	54.217	45.2206	25.063	0.867606	0	0	18.1529	1.32488	0.843209	1174.65
7.6-15C-R6	2.5	14.5	7.633	31.1	2148.72	7.75066	1101.63	1105.65	2007.03	57.2155	42.8255	26.3714	0.903823	0	0	18.0303	1.3979	0.889309	1105.65
7.6-15C-R6	3	14.8	7.655	31.1	2150.82	7.7705	1053.21	1057.03	2001.49	60.338	40.5689	27.6935	0.972727	0	0	17.8146	1.47459	0.93869	1057.03
7.6-15C-R6	3.5	14.5	7.601	31.1	2143.27	7.71652	1194.65	1199	2011.91	53.0175	46.4414	24.5095	0.835477	0	0	18.2386	1.29534	0.82406	1199
7.6-15C-R6	4	14.5	7.606	31.1	2140.71	7.72186	1177.73	1182.02	2007.96	53.5683	45.7837	24.7925	0.845816	0	0	18.2058	1.30879	0.83262	1182.02
7.6-15C-R6	4.5	14.5	7.615	31.1	2145.65	7.73147	1153.05	1157.25	2009.86	54.8185	44.8243	25.3091	0.864737	0	0	18.157	1.33934	0.852052	1157.25
7.6-15C-R6	5	14.5	7.644	31.1	2133.56	7.76238	1062.73	1066.6	1989.1	58.2555	41.313	27.0399	0.928544	0	0	17.9132	1.42331	0.905474	1066.6
7.6-15C-R6	5.5	14.4	7.655	31.1	2135.98	7.77529	1029.72	1033.48	1987.78	59.7687	40.1531	27.7333	0.947717	0	0	17.8256	1.46015	0.928719	1033.48
7.6-15C-R6	6	14.7	7.642	31.1	2149.15	7.75787	1084.57	1088.51	2004.35	58.4929	41.9047	26.8987	0.936145	0	0	17.938	1.42937	0.90971	1088.51
7.6-15C-R6	6.5	14.6	7.629	31.1	2162.32	7.74521	1124.68	1128.78	2021.13	57.0936	43.5878	26.1233	0.900871	0	0	18.0742	1.39504	0.887679	1128.78
8.0-15C-R1	0	15.8	8.027	31.8	2051.88	8.14458	386.336	387.722	1726.76	129.975	14.3818	62.6131	2.56072	0	0	11.9792	3.16546	2.02321	387.722
8.0-15C-R1	0.4	14.6	8.013	31.8	2060.21	8.14619	383.295	384.691	1743.61	126.483	14.7967	61.341	2.30089	0	0	12.2219	3.07721	1.96171	384.691
8.0-15C-R1	0.8	14.3	8.013	31.8	2061.82	8.15019	378.792	380.177	1745.18	126.47	14.758	61.4493	2.25837	0	0	12.2314	3.07618	1.95981	380.177
8.0-15C-R1	1	14	8.029	31.8	2066.15	8.17064	358.8	360.117	1738.85	130.739	14.1091	63.5325	2.30198	0	0	12.0121	3.17931	2.02426	360.117
8.0-15C-R1	1.5	13.8	8.029	31.8	2069.23	8.17334	356.316	357.628	1741.62	130.863	14.0985	63.6082	2.27342	0	0	12.0211	3.18188	2.02506	357.628
8.0-15C-R1	2	14.1	8.032	31.8	2070.13	8.17239	358.076	359.389	1740.29	131.823	14.0372	63.8712	2.3329	0	0	11.973	3.20592	2.04162	359.389
8.0-15C-R1	2.5	13.9	8.028	31.8	2076.52	8.17098	360.1	361.424	1748.55	131.121	14.2041	63.4477	2.28236	0	0	12.0447	3.18839	2.02962	361.424
8.0-15C-R1	3	13.7	8.036	31.8	2078.95	8.18189	349.741	351.029	1745.52	133.306	13.8813	64.5288	2.29705	0	0	11.9375	3.24106	2.06231	351.029
8.0-15C-R1	3.5	13.8	8.026	31.8	2076.71	8.17027	360.582	361.909	1750.08	130.573	14.2673	63.2359	2.25744	0	0	12.0761	3.17485	2.02059	361.909
8.0-15C-R1	4	14.1	8.026	31.8	2065.11	8.16622	363.101	364.432	1739.83	129.931	14.2341	63.1213	2.30002	0	0	12.0516	3.1599	2.01231	364.432
8.0-15C-R1	4.5	14.3	8.02	31.8	2073.01	8.1574	373.685	375.051	1750.46	128.975	14.5591	62.308	2.29617	0	0	12.1466	3.13713	1.99864	375.051
8.0-15C-R1	5	14.1	8.011	31.8	2072.55	8.15084	379.674	381.066	1755.92	126.568	14.8838	61.2807	2.21996	0	0	12.2823	3.07812	1.96023	381.066
8.0-15C-R1	5.5	14.4	8.021	31.8	2057.29	8.15706	371.341	372.697	1736.08	128.252	14.4233	62.3905	2.31579	0	0	12.1052	3.11977	1.988	372.697
8.0-15C-R1	6	14.2	8.005	31.8	2065.63	8.14332	386.24	387.654	1753.6	124.658	15.0946	60.5186	2.20231	0	0	12.3577	3.0319	1.9312	387.654
8.0-15C-R1	6.5	14.6	7.989	31.8	2063.98	8.12155	409.902	411.395	1761.82	120.756	15.8238	58.4821	2.17401	0	0	12.5842	2.93788	1.87288	411.395
8.0-15C-R2	0	15.8	8.027	31.8	2051.88	8.14458	386.336	387.722	1726.76	129.975	14.3818	62.6131	2.56072	0	0	11.9792	3.16546	2.02321	387.722
8.0-15C-R2	0.4	14.9	8.021	31.8	2059.97	8.15039	379.731	381.109	1738.14	128.619	14.5254	62.2082	2.38878	0	0	12.0982	3.12994	1.99659	381.109
8.0-15C-R2	0.8	14.4	8.027	31.8	2063.67	8.16323	366.46	367.798	1737.77	130.212	14.2337	63.1337	2.34891	0	0	12.0284	3.16745	2.01839	367.798
8.0-15C-R2	1	14.3	8.034	31.8	2068.4	8.17175	358.833	360.146	1737.36	132.311	13.9804	64.0463	2.37331	0	0	11.9374	3.21825	2.05033	360.146
8.0-15C-R2	1.5	13.9	8.033	31.8	2069.37	8.1761	353.955	355.256	1739.08	131.956	13.9617	64.0721	2.30941	0	0	11.9616	3.2087	2.04255	355.256
8.0-15C-R2	2	14.3	8.035	31.8	2075.57	8.17279	359.121	360.434	1742.92	133.052	13.9916	64.1736	2.37899	0	0	11.9341	3.23628	2.06181	360.434
8.0-15C-R2	2.5	13.8	8.035	31.8	2068.25	8.1795	350.339	351.628	1736.85	132.367	13.862	64.3615	2.30588	0	0	11.9333	3.21846	2.04834	351.628
8.0-15C-R2	3	13.8	8.043	31.8	2069.61	8.18771	342.964	344.226	1732.74	134.574	13.5702	65.3773	2.34989	0	0	11.8215	3.27212	2.0825	344.226
8.0-15C-R2	3.5	13.9	8.034	31.8	2067.54	8.17712	352.668	353.964	1736.84	132.097	13.9109	64.1975	2.31485	0	0	11.9445	3.21212	2.04473	353.964
8.0-15C-R2	4	14.3	8.03	31.8	2054.72	8.16762	360.332	361.65	1728.11	130.36	14.0388	63.5421	2.35084	0	0	11.9735	3.17081	2.0201	361.65
8.0-15C-R2	4.5	14.7	8.019	31.8	2060.7	8.15101	378.754	380.131	1740.17	128.078	14.5767	62.0363	2.34827	0	0	12.1329	3.11626	1.98702	380.131
8.0-15C-R2	5	14.3	8.015	31.8	2062.16	8.15225	376.794	378.172	1744.21	126.999	14.6802	61.6931	2.26908	0	0	12.2026	3.08904	1.96801	378.172
8.0-15C-R2	5.5	14.6	8.02	31.8	2056.05	8.15336	375.27	376.637	1735.53	127.993	14.4868	62.1943	2.33921	0	0	12.1133	3.11396	1.98513	376.637
8.0-15C-R2	6	14.5	8.004	31.8	2053.86	8.13827	389.926	391.348	1743.76	123.786	15.0988	60.29	2.23845	0	0	12.3466	3.01137	1.91933	391.348
8.0-15C-R2	6.5	14.4	7.988	31.8	2051.66	8.12316	405.105	406.584	1751.72	119.69	15.7348	58.4304	2.1419	0	0	12.5844	2.91149	1.85528	406.584
8.0-15C-R3	0	16.3	8.051	31.9	2100	8.16251	377.865	379.212	1751.29	140.098	13.8505	65.726	2.79929	0	0	11.6792	3.41145	2.18342	379.212
8.0-15C-R3	0.4	14.2	8.047	31.9	2102.46	8.18644	350.202	351.484	1757.3	138.35	13.6785	66.0353	2.43716	0	0	11.7815	3.36282	2.14253	351.484
8.0-15C-R3	0.8	13.6	8.046	31.9	2105.51	8.19351	342.848	344.113	1760.94	138.046	13.6425	66.1425	2.34209	0	0	11.812	3.35403	2.1343	344.113
8.0-15C-R3	1	14.1	8.047	31.9	2103	8.18779	348.814	350.092	1757.81	138.347	13.6664	66.0746	2.42204	0	0	11.7843	3.3625	2.14188	350.092
8.0-15C-R3	1.5	13.5	8.045	31.9	2115.87	8.19386	344.053	345.324	1770.62	138.44	13.7332	66.0557	2.32209	0	0	11.8435	3.3634	2.13983	345.324
8.0-15C-R3	2	13.6	8.034	31.9	2123.45	8.18123	357.412	358.73	1784.57	135.999	14.222	64.6134	2.27681	0	0	12.01	3.30432	2.10266	358.73
8.0-15C-R3	2.5	13.5	8.035	31.9	2124.16	8.18361	355.043	356.355	1784.57	136.277	14.1718	64.7786	2.26794	0	0	11.9987	3.31084	2.10639	356.355
8.0-15C-R3	3	13.6	8.042	31.9	2124.82	8.18945	349.884	351.175	1780.34	138.267	13.9224	65.6333	2.32028	0	0	11.8973	3.35942	2.13773	351.175
8.0-15C-R3	3.5	13.8	8.073	31.9	2109.05	8.21848	321.533	322.716	1745.11	145.9	12.715	69.6121	2.5276	0	0	11.439	3.54535	2.25696	322.716
8.0-15C-R3	4	13.5	8.057	31.9	2117.92	8.20617	333.208	334.439	1764.12	141.899	13.3003	67.6164	2.38888	0	0	11.6776	3.44743	2.19329	334.439
8.0-15C-R3	4.5	13.6	8.043	31.9	2104.99	8.19043	345.6	346.875	1762.53	137.195	13.752	65.7563	2.32554	0	0	11.8538	3.33335	2.12114	346.875
8.0-15C-R3	5	13.7	8.027	31.9	2111.72	8.17267	363.817	365.157	1779.01	133.386	14.4319	63.6904	2.25338	0	0	12.0916	3.24105	2.06282	365.157
8.0-15C-R3	5.5	14	8.107	31.9	2113.79	8.25056	295.77	296.856	1724.28	156.274	11.624	74.1909	2.77266	0	0	10.9928	3.79796	2.41876	296.856
8.0-15C-R3	6	14	8.107	31.9	2113.79	8.25056	295.77	296.856	1724.28	156.274	11.624	74.1909	2.77266	0	0	10.9928	3.79796	2.41876	296.856
8.0-15C-R3	6.5	14	8.107	31.9	2113.79	8.25056	295.77	296.856	1724.28	156.274	11.624	74.1909	2.77266	0	0	10.9928	3.79796	2.41876	296.856
8.0-15C-R4	0	16.3	8.051	31.9	2100	8.16251	377.865	379.212	1751.29	140.098	13.8505	65.726	2.79929	0	0	11.6792	3.41145	2.18342	379.212
8.0-15C-R4	0.4	14.4	8.044	31.9	2100.88	8.18068	355.822	357.122	1757.85	137.504	13.8128	65.572	2.45021	0	0	11.8174	3.34277	2.13064	357.122
8.0-15C-R4	0.8	13.5	8.066	31.9	2109.46	8.21538	323.713	324.908	1750.57	143.826	12.9212	68.8021	2.44006	0	0	11.5407	3.49425	2.22308	324.908
8.0-15C-R4	1	14.3	8.05	31.9	2102.44	8.18817	348.797	350.072	1755.17	139.209	13.5818	66.3826	2.46977	0	0	11.7373	3.38394	2.15643	350.072
8.0-15C-R4	1.5	13.7	8.05	31.9	2115.65	8.19628	342.219	343.48	1766.9	139.88	13.5752	66.6231	2.37928	0	0	11.7686	3.39882	2.16324	343.48
8.0-15C-R4	2	13.9	8.036	31.9	2112.19	8.17922	358.061	359.377	1773.3	135.906	14.1157	64.749	2.3308	0	0	11.9582	3.30272	2.10293	359.377
8.0-15C-R4	2.5	13.6	8.04	31.9	2124.48	8.1874	351.752	353.05	1781.4	137.698	13.9968	65.3772	2.30934	0	0	11.9254	3.34558	2.12892	353.05
8.0-15C-R4	3	13.7	8.039	31.9	2123.77	8.18502	354.1	355.405	1781.42	137.417	14.0464	65.2105	2.31834	0	0	11.9366	3.33899	2.12516	355.405
8.0-15C-R4	3.5	14.1	8.081	31.9	2108.81	8.22261	318.498	319.666	1739.04	148.295	12.4786	70.5634	2.62424	0	0	11.3255	3.6043	2.2959	319.666
8.0-15C-R4	4	13.6	8.059	31.9	2111.73	8.20686	331.797	333.021	1757.35	142.064	13.2027	67.8369	2.41517	0	0	11.6389	3.45166	2.19643	333.021
8.0-15C-R4	4.5	13.8	8.042	31.9	2113.75	8.18673	350.991	352.282	1770.66	137.597	13.8799	65.5526	2.34936	0	0	11.877	3.34358	2.12851	352.282
8.0-15C-R4	5	13.9	8.027	31.9	2117.65	8.17	367.963	369.316	1784.05	133.856	14.5061	63.6167	2.28181	0	0	12.0961	3.2529	2.07121	369.316
8.0-15C-R4	5.5	14.2	8.105	31.9	2118.38	8.24581	300.635	301.736	1729.54	156.11	11.7425	73.8233	2.79414	0	0	11.0217	3.79451	2.41757	301.736
8.0-15C-R4	6	14.2	8.105	31.9	2128.38	8.24583	302.091	303.197	1738	156.881	11.7994	73.8261	2.79428	0	0	11.0353	3.81325	2.4295	303.197
8.0-15C-R4	6.5	14.2	8.105	31.9	2128.38	8.24583	302.091	303.197	1738	156.881	11.7994	73.8261	2.79428	0	0	11.0353	3.81325	2.4295	303.197
8.0-15C-R5	0	16.5	7.987	31.1	2105.1	8.09476	458.761	460.392	1803.85	121.528	16.7905	55.8075	2.39893	0	0	12.817	2.97516	1.901	460.392
8.0-15C-R5	0.4	14.6	7.984	31.1	2123.65	8.1168	431.188	432.759	1823.11	121.168	16.711	56.0957	2.11955	0	0	12.9451	2.96067	1.8839	432.759
8.0-15C-R5	0.8	14.3	7.981	31.1	2146.43	8.11774	433.953	435.54	1845.21	121.651	16.9738	55.8606	2.06582	0	0	13.0352	2.97168	1.88972	435.54
8.0-15C-R5	1	14.4	8.015	31.1	2151.56	8.15138	398.368	399.823	1828.2	130.682	15.534	59.7521	2.25303	0	0	12.5205	3.19258	2.03061	399.823
8.0-15C-R5	1.5	14.2	8.023	31.1	2153.96	8.16229	386.95	388.367	1825.18	132.872	15.182	60.7784	2.26775	0	0	12.4092	3.24552	2.06342	388.367
8.0-15C-R5	2	14.6	8.035	31.1	2163.82	8.16924	382.648	384.042	1825.54	136.903	14.8298	62.0857	2.39161	0	0	12.2371	3.34514	2.12854	384.042
8.0-15C-R5	2.5	14.3	8.041	31.1	2166.43	8.17944	372.142	373.503	1823.92	138.601	14.5561	62.9344	2.38114	0	0	12.1599	3.38575	2.15303	373.503
8.0-15C-R5	3	14.6	8.06	31.1	2177.99	8.19488	359.734	361.045	1820.59	144.835	13.9417	65.1949	2.53705	0	0	11.8966	3.53894	2.25186	361.045
8.0-15C-R5	3.5	14.5	8.001	31.1	2128.69	8.13562	411.053	412.552	1817.06	125.685	15.9795	58.0727	2.193	0	0	12.6951	3.07077	1.95355	412.552
8.0-15C-R5	4	14.5	8.006	31.1	2149.52	8.14079	409.559	411.053	1832.16	128.248	15.9215	58.6581	2.21928	0	0	12.6507	3.13339	1.99338	411.053
8.0-15C-R5	4.5	14.3	8.002	31.1	2129.93	8.13932	406.746	408.233	1817.63	125.938	15.9096	58.2576	2.17106	0	0	12.6869	3.0764	1.95631	408.233
8.0-15C-R5	5	14.5	7.996	31.1	2147.86	8.13051	420.487	422.02	1837.03	125.581	16.3463	57.4995	2.16736	0	0	12.8005	3.06823	1.95193	422.02
8.0-15C-R5	5.5	14.4	8	31.1	2129.06	8.13593	410.513	412.012	1818.07	125.415	16.0076	57.9912	2.17427	0	0	12.7134	3.0639	1.94877	412.012
8.0-15C-R5	6	14.6	8.019	31.1	2141.15	8.15279	395.431	396.872	1816.4	131.154	15.3252	60.1536	2.30271	0	0	12.4404	3.20465	2.03915	396.872
8.0-15C-R5	6.5	14.8	8.038	31.1	2153.25	8.16961	380.833	382.216	1814.23	137.104	14.6694	62.3754	2.43843	0	0	12.1736	3.35064	2.13295	382.216
8.0-15C-R6	0	16.5	7.987	31.1	2105.1	8.09476	458.761	460.392	1803.85	121.528	16.7905	55.8075	2.39893	0	0	12.817	2.97516	1.901	460.392
8.0-15C-R6	0.4	14.7	7.987	31.1	2123.62	8.11855	429.493	431.055	1821.19	121.946	16.5944	56.4015	2.14795	0	0	12.8961	2.97993	1.89655	431.055
8.0-15C-R6	0.8	14.4	7.984	31.1	2136.39	8.11948	430.199	431.77	1834.46	121.843	16.7753	56.1639	2.09347	0	0	12.9704	2.97664	1.89326	431.77
8.0-15C-R6	1	14.4	8.015	31.1	2141.56	8.15136	396.481	397.929	1819.46	130.052	15.4604	59.75	2.25294	0	0	12.5056	3.17719	2.02082	397.929
8.0-15C-R6	1.5	14.3	8.025	31.1	2153.76	8.163	386.439	387.853	1823.63	133.432	15.1153	60.9824	2.29268	0	0	12.3769	3.25946	2.07272	387.853
8.0-15C-R6	2	14.7	8.03	31.1	2152.45	8.16275	387.454	388.864	1818.95	134.845	14.9701	61.4392	2.37809	0	0	12.2918	3.29515	2.09718	388.864
8.0-15C-R6	2.5	14.5	8.038	31.1	2164.86	8.17367	378.112	379.491	1824.47	137.752	14.699	62.49	2.39378	0	0	12.197	3.36559	2.1411	379.491
8.0-15C-R6	3	14.8	8.056	31.1	2166.25	8.18807	364.772	366.097	1813.16	142.971	14.0508	64.6096	2.54428	0	0	11.933	3.49403	2.22422	366.097
8.0-15C-R6	3.5	14.8	8.028	31.1	2131.58	8.15933	387.345	388.752	1802.06	132.995	14.9203	61.1569	2.38134	0	0	12.2883	3.25025	2.06904	388.752
8.0-15C-R6	4	14.5	8.014	31.1	2140.86	8.149	399.105	400.561	1819.43	129.786	15.5151	59.5961	2.2616	0	0	12.5172	3.17096	2.01728	400.561
8.0-15C-R6	4.5	14.6	8.002	31.1	2128.32	8.13531	411.593	413.092	1816.05	125.955	15.9516	58.1541	2.21186	0	0	12.6768	3.07764	1.95833	413.092
8.0-15C-R6	5	14.5	8.002	31.1	2138.86	8.13666	411.935	413.437	1825.35	126.563	16.0138	58.1906	2.19828	0	0	12.6953	3.09221	1.96719	413.437
8.0-15C-R6	5.5	14.4	8.003	31.1	2129.56	8.13901	407.282	408.77	1816.62	126.209	15.8816	58.3393	2.18977	0	0	12.6686	3.08328	1.9611	408.77
8.0-15C-R6	6	14.5	8.022	31.1	2140.05	8.15721	390.36	391.784	1813.53	131.834	15.1751	60.5472	2.30476	0	0	12.3965	3.221	2.04912	391.784
8.0-15C-R6	6.5	14.4	8.041	31.1	2150.53	8.17806	370.921	372.276	1810.08	137.585	14.4638	62.8931	2.39577	0	0	12.1349	3.3612	2.13787	372.276
8.4-15C-R1	0	15.8	8.027	31.8	2091.88	8.14464	394.046	395.46	1761.49	132.609	14.6688	62.621	2.5611	0	0	12.0406	3.2296	2.0642	395.46
8.4-15C-R1	0.4	14.7	8.453	31.8	2334.18	8.59317	122.61	123.056	1559.28	317.666	4.71875	133.073	6.49998	0	0	8.04641	7.72913	4.92832	123.056
8.4-15C-R1	0.8	14.4	8.511	31.8	2372.34	8.65637	102.549	102.924	1513.7	353.053	3.98314	145.229	7.31153	0	0	7.77398	8.58812	5.47258	102.924
8.4-15C-R1	1	14.1	8.485	31.8	2362.34	8.63419	109.409	109.81	1539.92	337.805	4.28901	140.063	6.75608	0	0	7.89796	8.21537	5.23178	109.81
8.4-15C-R1	1.5	13.9	8.508	31.8	2391.4	8.66044	102.139	102.515	1530.77	354.294	4.02887	145.005	7.04442	0	0	7.80661	8.61513	5.4841	102.515
8.4-15C-R1	2	14.1	8.48	31.8	2362.63	8.62911	111.161	111.568	1546.37	335.276	4.35768	139.033	6.6775	0	0	7.92443	8.15386	5.19261	111.568
8.4-15C-R1	2.5	13.8	8.457	31.8	2335.43	8.60994	116.472	116.901	1555.76	319.451	4.60849	134.559	6.21272	0	0	8.03163	7.76734	4.94342	116.901
8.4-15C-R1	3	13.8	8.459	31.8	2345.43	8.61199	116.269	116.697	1560.39	321.917	4.60046	134.968	6.24209	0	0	8.02832	7.82729	4.98157	116.697
8.4-15C-R1	3.5	13.8	8.472	31.8	2320.13	8.62517	110.362	110.768	1526.73	324.676	4.36671	137.611	6.43438	0	0	7.93588	7.89438	5.02427	110.768
8.4-15C-R1	4	14.2	8.451	31.8	2333.55	8.59819	120.67	121.112	1561.49	316.37	4.71591	133.045	6.27689	0	0	8.06149	7.69464	4.90118	121.112
8.4-15C-R1	4.5	14.4	8.477	31.8	2321.69	8.62176	111.622	112.03	1521.42	327.674	4.33555	138.175	6.75149	0	0	7.90555	7.97077	5.07919	112.03
8.4-15C-R1	5	14.2	8.455	31.8	2334.8	8.60225	119.244	119.68	1557.54	318.537	4.66016	133.852	6.33592	0	0	8.0394	7.74735	4.93476	119.68
8.4-15C-R1	5.5	15.4	8.452	31.8	2353.86	8.58236	127.931	128.393	1574.11	320.319	4.82002	132.351	6.76369	0	0	8.06243	7.79831	4.97992	128.393
8.4-15C-R1	6	15.2	8.448	31.8	2343.86	8.58109	127.833	128.295	1571.96	316.796	4.84553	131.696	6.62082	0	0	8.07935	7.71119	4.92215	128.295
8.4-15C-R1	6.5	15	8.444	31.8	2371.36	8.57988	129.891	130.362	1596.49	318.67	4.9535	131.051	6.48146	0	0	8.12685	7.75548	4.94828	130.362
8.4-15C-R2	0	15.8	8.027	31.8	2091.88	8.14464	394.046	395.46	1761.49	132.609	14.6688	62.621	2.5611	0	0	12.0406	3.2296	2.0642	395.46
8.4-15C-R2	0.4	14.8	8.481	31.8	2342.95	8.6202	113.261	113.673	1531.1	333.087	4.34567	138.692	6.98177	0	0	7.8981	8.10501	5.16909	113.673
8.4-15C-R2	0.8	14.4	8.499	31.8	2352.95	8.64415	105.614	106	1515.69	343.712	4.10218	142.723	7.10871	0	0	7.81726	8.3609	5.32779	106
8.4-15C-R2	1	14.1	8.486	31.8	2334.51	8.63517	107.707	108.102	1519.38	334.052	4.22228	140.261	6.77133	0	0	7.87096	8.1241	5.17366	108.102
8.4-15C-R2	1.5	13.9	8.498	31.8	2348.27	8.65022	103.425	103.805	1513.98	342.254	4.0796	142.908	6.88052	0	0	7.82257	8.32238	5.29775	103.805
8.4-15C-R2	2	14.2	8.48	31.8	2322.63	8.62764	109.654	110.056	1518.49	329.242	4.28539	138.945	6.71726	0	0	7.89201	8.0077	5.10059	110.056
8.4-15C-R2	2.5	13.8	8.466	31.8	2338.25	8.61909	113.385	113.802	1546.77	324.371	4.48633	136.39	6.34504	0	0	7.98332	7.88696	5.01955	113.802
8.4-15C-R2	3	13.8	8.457	31.8	2355.43	8.60997	117.523	117.955	1569.9	322.377	4.65006	134.565	6.21315	0	0	8.04772	7.83849	4.9887	117.955
8.4-15C-R2	3.5	13.8	8.472	31.8	2325.43	8.62517	110.628	111.035	1530.44	325.471	4.37725	137.612	6.4345	0	0	7.94016	7.91371	5.03657	111.035
8.4-15C-R2	4	14.2	8.453	31.8	2374.18	8.60028	122.12	122.568	1587.88	323.268	4.77258	133.46	6.30716	0	0	8.08253	7.8624	5.00804	122.568
8.4-15C-R2	4.5	14.5	8.476	31.8	2361.38	8.61938	114.498	114.915	1550.29	333.205	4.43361	137.904	6.77735	0	0	7.9416	8.10593	5.1664	114.915
8.4-15C-R2	5	14.3	8.449	31.8	2332.92	8.59474	121.922	122.368	1563.41	315.333	4.75018	132.567	6.28559	0	0	8.07184	7.66998	4.88649	122.368
8.4-15C-R2	5.5	14.4	8.448	31.8	2342.92	8.59233	123.393	123.844	1571.68	316.323	4.79273	132.294	6.3092	0	0	8.08506	7.69465	4.90324	123.844
8.4-15C-R2	6	14.4	8.439	31.8	2319.79	8.58316	125.568	126.027	1565.96	308.586	4.87723	130.484	6.17735	0	0	8.11961	7.50645	4.78331	126.027
8.4-15C-R2	6.5	14.4	8.43	31.8	2326.97	8.57403	129.532	130.005	1581.79	305.222	5.03117	128.695	6.04887	0	0	8.18066	7.42461	4.73116	130.005
8.4-15C-R3	0	16.3	8.051	31.9	2100	8.16251	377.865	379.212	1751.29	140.098	13.8505	65.726	2.79929	0	0	11.6792	3.41145	2.18342	379.212
8.4-15C-R3	0.4	14.3	8.466	31.9	2346.59	8.61197	116.143	116.568	1550.75	326.354	4.52248	136.575	6.55327	0	0	7.97469	7.93316	5.05545	116.568
8.4-15C-R3	0.8	13.5	8.444	31.9	2359.67	8.60095	120.799	121.245	1587.29	316.872	4.8218	132.717	5.92887	0	0	8.11747	7.6984	4.8978	121.245
8.4-15C-R3	1	14.1	8.426	31.9	2349.67	8.57417	130.544	131.023	1601.46	306.827	5.11467	128.664	5.89605	0	0	8.21453	7.45739	4.75028	131.023
8.4-15C-R3	1.5	13.6	8.457	31.9	2383.76	8.61279	117.771	118.206	1588.38	326.972	4.68631	135.284	6.15004	0	0	8.06013	7.94428	5.05525	118.206
8.4-15C-R3	2	13.8	8.466	31.9	2366.59	8.61907	114.641	115.063	1565.04	329.114	4.53347	136.963	6.35766	0	0	7.99448	7.9974	5.09113	115.063
8.4-15C-R3	2.5	13.5	8.447	31.9	2340.62	8.60397	118.662	119.101	1570.08	315.624	4.73651	133.317	5.97022	0	0	8.08431	7.66808	4.87851	119.101
8.4-15C-R3	3	13.6	8.448	31.9	2350.62	8.60359	119.35	119.79	1575.93	317.609	4.74911	133.447	6.02114	0	0	8.08578	7.7168	4.9105	119.79
8.4-15C-R3	3.5	13.9	8.463	31.9	2335.64	8.61456	114.631	115.052	1546.93	323.05	4.51905	136.265	6.35108	0	0	7.98568	7.85059	4.99869	115.052
8.4-15C-R3	4	13.5	8.418	31.9	2331.51	8.57448	129.267	129.745	1598.1	300.162	5.1598	127.509	5.57822	0	0	8.2549	7.29243	4.63951	129.745
8.4-15C-R3	4.5	13.6	8.463	31.9	2325.64	8.6188	112.617	113.033	1540.04	321.439	4.48122	136.49	6.23576	0	0	7.97993	7.80985	4.96971	113.033
8.4-15C-R3	5	13.7	8.414	31.9	2330.25	8.56758	131.945	132.432	1601.77	298.156	5.23402	126.573	5.59428	0	0	8.2781	7.24465	4.61098	132.432
8.4-15C-R3	5.5	14.1	8.433	31.9	2356.22	8.58129	128.128	128.597	1597.8	311.185	5.01999	130.06	5.99351	0	0	8.17643	7.56331	4.81775	128.597
8.4-15C-R3	6	14.1	8.433	31.9	2346.22	8.58127	127.556	128.024	1590.62	309.776	4.99761	130.057	5.9933	0	0	8.16823	7.52906	4.79594	128.024
8.4-15C-R3	6.5	14.1	8.433	31.9	2376.22	8.58132	129.27	129.744	1612.16	314.002	5.06475	130.066	5.99392	0	0	8.19266	7.6318	4.86138	129.744
8.4-15C-R4	0	16.3	8.051	31.9	2100	8.16251	377.865	379.212	1751.29	140.098	13.8505	65.726	2.79929	0	0	11.6792	3.41145	2.18342	379.212
8.4-15C-R4	0.4	14.3	8.466	31.9	2346.59	8.61197	116.143	116.568	1550.75	326.354	4.52248	136.575	6.55327	0	0	7.97469	7.93316	5.05545	116.568
8.4-15C-R4	0.8	13.5	8.452	31.9	2356.59	8.60908	117.668	118.103	1575.35	320.43	4.69682	134.335	6.04087	0	0	8.06808	7.78485	4.9528	118.103
8.4-15C-R4	1	14.3	8.429	31.9	2324.96	8.57436	129.038	129.509	1580	304.926	5.02458	129.106	6.00964	0	0	8.17367	7.41227	4.7235	129.509
8.4-15C-R4	1.5	13.7	8.457	31.9	2343.76	8.61131	116.202	116.631	1560.07	321.153	4.60952	135.196	6.18683	0	0	8.02753	7.80342	4.96662	116.631
8.4-15C-R4	2	13.8	8.466	31.9	2326.59	8.61901	112.599	113.013	1536.95	323.164	4.45272	136.951	6.3568	0	0	7.96255	7.85281	4.99908	113.013
8.4-15C-R4	2.5	13.6	8.446	31.9	2340.3	8.60154	119.54	119.981	1571.02	315.128	4.75669	133.04	5.9928	0	0	8.08915	7.65652	4.87214	119.981
8.4-15C-R4	3	13.7	8.449	31.9	2361.25	8.6032	120.072	120.514	1582.22	319.69	4.763	133.578	6.07245	0	0	8.08771	7.76788	4.944	120.514
8.4-15C-R4	3.5	14	8.46	31.9	2331.2	8.61009	115.988	116.414	1547.41	320.937	4.55843	135.575	6.34504	0	0	7.99808	7.79979	4.96737	116.414
8.4-15C-R4	4	13.6	8.417	31.9	2371.19	8.57211	132.56	133.049	1628.01	305.167	5.27479	127.251	5.60022	0	0	8.29356	7.41451	4.71814	133.049
8.4-15C-R4	4.5	13.8	8.456	31.9	2363.44	8.60891	118.115	118.55	1575.16	323.577	4.67086	134.923	6.21055	0	0	8.04822	7.86286	5.00548	118.55
8.4-15C-R4	5	13.9	8.403	31.9	2326.79	8.55358	137.455	137.96	1611.95	292.531	5.41884	124.269	5.51911	0	0	8.34617	7.10892	4.52645	137.96
8.4-15C-R4	5.5	14.1	8.434	31.9	2336.79	8.58227	126.626	127.09	1582.66	308.937	4.96114	130.254	6.00714	0	0	8.15434	7.50869	4.78296	127.09
8.4-15C-R4	6	14.1	8.434	31.9	2326.53	8.58226	126.041	126.503	1575.3	307.489	4.93825	130.251	6.00693	0	0	8.14582	7.47349	4.76054	126.503
8.4-15C-R4	6.5	14.1	8.434	31.9	2336.53	8.58227	126.611	127.075	1582.47	308.901	4.96056	130.254	6.00714	0	0	8.15412	7.50779	4.78239	127.075
8.4-15C-R5	0	16.5	7.987	31.1	2095.1	8.09475	456.535	458.159	1795.05	120.931	16.709	55.8061	2.39886	0	0	12.8014	2.96055	1.89167	458.159
8.4-15C-R5	0.4	14.6	8.471	31.1	2361.41	8.61329	118.23	118.66	1568.08	326.918	4.58207	132.852	6.64875	0	0	8.04803	7.98804	5.08286	118.66
8.4-15C-R5	0.8	14.4	8.453	31.1	2355.9	8.59784	123.645	124.096	1586.23	316.967	4.82142	129.44	6.29826	0	0	8.14979	7.74352	4.9252	124.096
8.4-15C-R5	1	14.4	8.428	31.1	2348.24	8.57244	133.106	133.592	1610.62	303.56	5.19036	124.567	5.94052	0	0	8.29887	7.41598	4.71687	133.592
8.4-15C-R5	1.5	14.3	8.424	31.1	2347.02	8.56979	134.089	134.579	1614.5	301.404	5.24478	123.867	5.84971	0	0	8.32465	7.36269	4.682	134.579
8.4-15C-R5	2	14.8	8.423	31.1	2346.71	8.56173	137.453	137.952	1615.2	301.09	5.29459	123.318	6.01484	0	0	8.3268	7.35828	4.68412	137.952
8.4-15C-R5	2.5	14.4	8.431	31.1	2349.16	8.57549	131.939	132.421	1607.74	305.149	5.14485	125.147	5.98234	0	0	8.28037	7.45483	4.74158	132.421
8.4-15C-R5	3	14.5	8.426	31.1	2347.63	8.569	134.477	134.967	1612.49	302.544	5.22772	124.11	5.94862	0	0	8.31049	7.39183	4.7025	134.967
8.4-15C-R5	3.5	14.5	8.449	31.1	2354.68	8.59236	125.668	126.126	1590.14	314.84	4.88528	128.581	6.27737	0	0	8.17204	7.69224	4.89361	126.126
8.4-15C-R5	4	14.5	8.435	31.1	2350.39	8.57814	130.968	131.446	1603.82	307.32	5.09133	125.85	6.07516	0	0	8.25513	7.50852	4.77673	131.446
8.4-15C-R5	4.5	14.5	8.416	31.1	2344.57	8.55884	138.469	138.974	1621.99	297.293	5.38293	122.19	5.81113	0	0	8.3738	7.26352	4.62087	138.974
8.4-15C-R5	5	14.5	8.411	31.1	2343.04	8.55376	140.504	141.016	1626.68	294.688	5.46202	121.236	5.74357	0	0	8.40618	7.19988	4.58038	141.016
8.4-15C-R5	5.5	14.5	8.449	31.1	2354.68	8.59236	125.668	126.126	1590.14	314.84	4.88528	128.581	6.27737	0	0	8.17204	7.69224	4.89361	126.126
8.4-15C-R5	6	14.6	8.45	31.1	2354.98	8.59196	125.846	126.305	1589.11	315.423	4.87726	128.703	6.3301	0	0	8.16544	7.70717	4.90414	126.305
8.4-15C-R5	6.5	14.7	8.451	31.1	2355.29	8.59157	126.025	126.483	1588.07	316.007	4.86924	128.826	6.38323	0	0	8.15884	7.72212	4.91469	126.483
8.4-15C-R6	0	16.5	7.987	31.1	2095.1	8.09475	456.535	458.159	1795.05	120.931	16.709	55.8061	2.39886	0	0	12.8014	2.96055	1.89167	458.159
8.4-15C-R6	0.4	14.7	8.497	31.1	2369.38	8.63829	109.833	110.233	1541.24	341.521	4.24366	137.992	7.10823	0	0	7.91296	8.34561	5.31151	110.233
8.4-15C-R6	0.8	14.5	8.478	31.1	2363.56	8.62182	115.274	115.694	1561	330.762	4.48122	134.324	6.71796	0	0	8.01149	8.08125	5.14109	115.694
8.4-15C-R6	1	14.5	8.451	31.1	2355.29	8.59439	124.926	125.382	1588.16	315.923	4.85645	128.973	6.3068	0	0	8.16047	7.7187	4.91045	125.382
8.4-15C-R6	1.5	14.4	8.426	31.1	2347.63	8.57041	133.89	134.379	1612.54	302.502	5.22091	124.181	5.91279	0	0	8.31132	7.39014	4.70044	134.379
8.4-15C-R6	2	14.8	8.415	31.1	2344.26	8.55361	140.705	141.216	1622.78	296.898	5.41985	121.787	5.90339	0	0	8.37775	7.25582	4.6189	141.216
8.4-15C-R6	2.5	14.5	8.434	31.1	2350.08	8.57712	131.354	131.833	1604.79	306.787	5.10634	125.656	6.06097	0	0	8.26121	7.4955	4.76845	131.833
8.4-15C-R6	3	14.4	8.432	31.1	2349.47	8.5765	131.552	132.032	1606.77	305.681	5.12975	125.341	5.99636	0	0	8.27423	7.46781	4.74984	132.032
8.4-15C-R6	3.5	14.5	8.451	31.1	2335	8.59436	123.795	124.246	1573.68	313.023	4.81247	128.968	6.3064	0	0	8.14409	7.64783	4.86536	124.246
8.4-15C-R6	4	14.5	8.428	31.1	2348.24	8.57103	133.69	134.177	1610.57	303.602	5.19713	124.495	5.97652	0	0	8.29805	7.41767	4.71894	134.177
8.4-15C-R6	4.5	14.5	8.424	31.1	2347.02	8.56697	135.267	135.76	1614.4	301.49	5.25845	123.724	5.92086	0	0	8.323	7.36606	4.6861	135.76
8.4-15C-R6	5	14.5	8.421	31.1	2346.1	8.56392	136.46	136.958	1617.25	299.911	5.30484	123.148	5.87946	0	0	8.34191	7.32749	4.66157	136.958
8.4-15C-R6	5.5	14.5	8.439	31.1	2351.61	8.5822	129.434	129.907	1599.94	309.458	5.03172	126.628	6.13226	0	0	8.23102	7.56073	4.80995	129.907
8.4-15C-R6	6	14.9	8.454	31.1	2356.21	8.59179	126.006	126.464	1585	317.719	4.83891	129.268	6.50588	0	0	8.13998	7.76537	4.94432	126.464
8.4-15C-R6	6.5	14.9	8.469	31.1	2360.8	8.60702	120.51	120.948	1569.97	325.936	4.62786	132.229	6.73806	0	0	8.0564	7.96621	5.0722	120.948
7.6-18C-R1	0	15.8	8.027	31.8	2051.88	8.14458	386.336	387.722	1726.76	129.975	14.3818	62.6131	2.56072	0	0	11.9792	3.16546	2.02321	387.722
7.6-18C-R1	0.4	17.5	7.633	31.8	2056.57	7.71564	1172.93	1177.05	1914.82	56.8236	41.5261	27.0014	1.1132	0	0	17.4158	1.38636	0.889542	1177.05
7.6-18C-R1	0.8	17.6	7.626	31.8	2065.43	7.70717	1203.99	1208.21	1925.34	56.2178	42.502	26.573	1.10157	0	0	17.4758	1.37174	0.880369	1208.21
7.6-18C-R1	1	17.6	7.588	31.8	2079.27	7.66734	1336.53	1341.21	1950	51.9484	47.1807	24.3949	1.00504	0	0	17.7328	1.26756	0.813511	1341.21
7.6-18C-R1	1.5	17.6	7.61	31.8	2092.84	7.6904	1271.46	1275.92	1956.25	54.9574	44.8839	25.6351	1.05986	0	0	17.6321	1.34098	0.860631	1275.92
7.6-18C-R1	2	17.5	7.622	31.8	2104.78	7.70411	1235.34	1239.68	1963.87	56.7522	43.7356	26.3433	1.08403	0	0	17.5799	1.38462	0.888426	1239.68
7.6-18C-R1	2.5	17.5	7.61	31.8	2132.84	7.69153	1291.3	1295.83	1994.2	55.9826	45.7168	25.6419	1.05307	0	0	17.7057	1.36584	0.876377	1295.83
7.6-18C-R1	3	17.5	7.602	31.8	2171.54	7.68313	1342.38	1347.1	2033.37	55.9886	47.5253	25.1835	1.03289	0	0	17.8129	1.36599	0.876471	1347.1
7.6-18C-R1	3.5	17.1	7.634	31.8	2076.73	7.72129	1163.92	1168.03	1933.82	57.3701	41.691	27.0962	1.08774	0	0	17.4794	1.39906	0.896854	1168.03
7.6-18C-R1	4	16.9	7.607	31.8	2072.35	7.69522	1235.96	1240.33	1938.27	53.7908	44.532	25.5138	1.00594	0	0	17.6861	1.31149	0.840327	1240.33
7.6-18C-R1	4.5	17	7.626	31.8	2085.43	7.71405	1188.79	1192.99	1944.67	56.5482	42.7067	26.6221	1.06009	0	0	17.5663	1.37887	0.883704	1192.99
7.6-18C-R1	5	17.1	7.621	31.8	2094.62	7.70764	1214.16	1218.44	1954.87	56.2	43.4905	26.3162	1.05408	0	0	17.6089	1.37053	0.878562	1218.44
7.6-18C-R1	5.5	17.1	7.621	31.8	2074.62	7.70765	1202.4	1206.65	1935.96	55.6567	43.0694	26.3163	1.05409	0	0	17.5758	1.35728	0.870069	1206.65
7.6-18C-R1	6	17.1	7.621	31.8	2074.62	7.70765	1202.4	1206.65	1935.96	55.6567	43.0694	26.3163	1.05409	0	0	17.5758	1.35728	0.870069	1206.65
7.6-18C-R1	6.5	17.1	7.621	31.8	2074.62	7.70765	1202.4	1206.65	1935.96	55.6567	43.0694	26.3163	1.05409	0	0	17.5758	1.35728	0.870069	1206.65
7.6-18C-R2	0	15.8	8.027	31.8	2051.88	8.14458	386.336	387.722	1726.76	129.975	14.3818	62.6131	2.56072	0	0	11.9792	3.16546	2.02321	387.722
7.6-18C-R2	0.4	17.3	7.62	31.8	2054.46	7.70431	1202.59	1206.83	1917.06	55.0572	42.8251	26.2416	1.06512	0	0	17.5299	1.34296	0.86129	1206.83
7.6-18C-R2	0.8	17.4	7.619	31.8	2066.19	7.70212	1217.22	1221.5	1928.4	55.2875	43.2197	26.1747	1.06937	0	0	17.5472	1.34873	0.865193	1221.5
7.6-18C-R2	1	17.4	7.642	31.8	2078.02	7.72622	1153.81	1157.87	1932.24	58.5585	40.9683	27.5592	1.13038	0	0	17.387	1.42852	0.916381	1157.87
7.6-18C-R2	1.5	17.5	7.637	31.8	2087.21	7.71983	1178.45	1182.59	1942.46	58.2017	41.7216	27.2439	1.12397	0	0	17.4352	1.41998	0.911117	1182.59
7.6-18C-R2	2	17.4	7.653	31.8	2089.81	7.73773	1127.96	1131.93	1939.69	60.3637	40.0504	28.2442	1.16075	0	0	17.3091	1.47256	0.944631	1131.93
7.6-18C-R2	2.5	17.4	7.656	31.8	2100.29	7.74087	1124.95	1128.91	1948.55	61.0791	39.9436	28.4336	1.16917	0	0	17.2989	1.49002	0.955827	1128.91
7.6-18C-R2	3	17.4	7.632	31.8	2106.4	7.71574	1200.36	1204.58	1962.27	58.0509	42.6211	26.9491	1.10344	0	0	17.5168	1.41614	0.908438	1204.58
7.6-18C-R2	3.5	16.9	7.616	31.8	2073.81	7.70468	1208.44	1212.72	1936.89	54.9372	43.5406	26.0374	1.02812	0	0	17.629	1.33944	0.858237	1212.72
7.6-18C-R2	4	16.9	7.599	31.8	2081.06	7.68679	1267.1	1271.58	1948.94	53.0478	45.654	25.0562	0.986621	0	0	17.7482	1.29338	0.828721	1271.58
7.6-18C-R2	4.5	16.9	7.62	31.8	2094.46	7.70889	1208.1	1212.38	1955.18	55.9952	43.5284	26.273	1.03811	0	0	17.635	1.36524	0.874765	1212.38
7.6-18C-R2	5	17.1	7.616	31.8	2090.57	7.70239	1227.51	1231.84	1952.61	55.4602	43.9686	26.0217	1.04141	0	0	17.6374	1.35249	0.866997	1231.84
7.6-18C-R2	5.5	17.1	7.616	31.8	2080.57	7.70239	1221.55	1225.86	1943.14	55.1917	43.7554	26.0218	1.04141	0	0	17.621	1.34594	0.862799	1225.86
7.6-18C-R2	6	17.1	7.616	31.8	2080.57	7.70239	1221.55	1225.86	1943.14	55.1917	43.7554	26.0218	1.04141	0	0	17.621	1.34594	0.862799	1225.86
7.6-18C-R2	6.5	17.1	7.616	31.8	2080.57	7.70239	1221.55	1225.86	1943.14	55.1917	43.7554	26.0218	1.04141	0	0	17.621	1.34594	0.862799	1225.86
7.6-18C-R3	0	16.3	8.051	31.9	2100	8.16251	377.865	379.212	1751.29	140.098	13.8505	65.726	2.79929	0	0	11.6792	3.41145	2.18342	379.212
7.6-18C-R3	0.4	17.2	7.651	31.9	2124.48	7.73796	1143.09	1147.12	1972.72	61.1866	40.8027	28.2699	1.14292	0	0	17.3776	1.49132	0.956458	1147.12
7.6-18C-R3	0.8	16.8	7.643	31.9	2133.55	7.73422	1154.42	1158.51	1984.26	60.2079	41.6935	27.8059	1.09277	0	0	17.5006	1.46683	0.939885	1158.51
7.6-18C-R3	1	16.7	7.65	31.9	2156.91	7.74274	1141.92	1145.97	2003.97	61.8039	41.3639	28.2549	1.10434	0	0	17.4854	1.50556	0.964477	1145.97
7.6-18C-R3	1.5	16.9	7.657	31.9	2165.28	7.74775	1134.41	1138.42	2009.27	63.1068	40.8505	28.6808	1.13763	0	0	17.4156	1.53762	0.985469	1138.42
7.6-18C-R3	2	16.5	7.679	31.9	2175.8	7.77556	1060.38	1064.15	2011.56	66.4614	38.6378	30.1662	1.16955	0	0	17.2436	1.61869	1.03647	1064.15
7.6-18C-R3	2.5	16.5	7.629	31.9	2191.42	7.72296	1216.06	1220.38	2043.78	59.8245	44.3105	26.9706	1.03616	0	0	17.7365	1.45704	0.932971	1220.38
7.6-18C-R3	3	16.6	7.647	31.9	2191.66	7.74075	1165.19	1169.33	2037.81	62.352	42.3316	28.0751	1.08935	0	0	17.5774	1.51876	0.972708	1169.33
7.6-18C-R3	3.5	16.9	7.657	31.9	2158.66	7.74775	1130.89	1134.89	2003.03	62.911	40.7238	28.6808	1.13763	0	0	17.4048	1.53285	0.982411	1134.89
7.6-18C-R3	4	17.2	7.652	31.9	2140.69	7.73901	1148.96	1153.01	1987.64	61.798	41.0123	28.333	1.14568	0	0	17.3951	1.50622	0.966016	1153.01
7.6-18C-R3	4.5	17.2	7.584	31.9	2155.95	7.6676	1379	1383.86	2023.92	53.3859	49.2237	24.3131	0.971982	0	0	17.8876	1.30119	0.834519	1383.86
7.6-18C-R3	5	17.3	7.645	31.9	2145.83	7.73051	1177.22	1181.37	1994.79	61.0219	41.8986	27.8841	1.13369	0	0	17.4571	1.48747	0.954212	1181.37
7.6-18C-R3	5.5	17.3	7.645	31.9	2147.39	7.73051	1178.09	1182.24	1996.26	61.0667	41.9294	27.8841	1.13369	0	0	17.4596	1.48856	0.954913	1182.24
7.6-18C-R3	6	17.3	7.645	31.9	2168.39	7.73051	1189.77	1193.96	2016.05	61.6719	42.3452	27.884	1.13368	0	0	17.4934	1.50331	0.964376	1193.96
7.6-18C-R3	6.5	17.3	7.615	31.9	2149.39	7.69905	1274.06	1278.55	2008.02	57.1339	45.3452	26.0696	1.05446	0	0	17.6949	1.39269	0.893414	1278.55
7.6-18C-R4	0	16.3	8.051	31.9	2110	8.16252	379.71	381.063	1759.9	140.792	13.9181	65.7279	2.79939	0	0	11.6938	3.42834	2.19423	381.063
7.6-18C-R4	0.4	17.2	7.636	31.9	2120.93	7.72224	1186.24	1190.42	1974.39	59.0607	42.3429	27.3372	1.10228	0	0	17.502	1.4395	0.923227	1190.42
7.6-18C-R4	0.8	16.7	7.641	31.9	2131.74	7.73328	1155.03	1159.12	1983.29	59.8484	41.8386	27.6906	1.08055	0	0	17.5241	1.45792	0.933961	1159.12
7.6-18C-R4	1	16.9	7.661	31.9	2158.99	7.75195	1119.41	1123.37	2001.95	63.4874	40.3104	28.938	1.14868	0	0	17.3668	1.54689	0.991412	1123.37
7.6-18C-R4	1.5	16.8	7.647	31.9	2162.72	7.73842	1158.36	1162.47	2010.39	61.5937	41.836	28.0561	1.10339	0	0	17.5128	1.5006	0.961519	1162.47
7.6-18C-R4	2	16.5	7.645	31.9	2182.39	7.73982	1161.8	1165.93	2029.84	61.7674	42.3333	27.959	1.07716	0	0	17.5897	1.50436	0.96327	1165.93
7.6-18C-R4	2.5	16.6	7.633	31.9	2180.44	7.72602	1201.96	1206.23	2032	60.1004	43.6674	27.2059	1.05301	0	0	17.6784	1.46391	0.937582	1206.23
7.6-18C-R4	3	16.8	7.624	31.9	2178.98	7.71423	1238.75	1243.14	2033.46	58.926	44.7394	26.6433	1.04363	0	0	17.7263	1.4356	0.919874	1243.14
7.6-18C-R4	3.5	17.3	7.659	31.9	2144.67	7.74517	1134.77	1138.77	1988.88	62.9301	40.3878	28.7688	1.17261	0	0	17.3269	1.53398	0.984051	1138.77
7.6-18C-R4	4	17.3	7.618	31.9	2128	7.7022	1251.5	1255.91	1986.83	56.9428	44.5422	26.2463	1.06215	0	0	17.6405	1.38803	0.890426	1255.91
7.6-18C-R4	4.5	17.3	7.615	31.9	2144.51	7.69905	1271.14	1275.61	2003.41	57.0026	45.241	26.0696	1.05446	0	0	17.6872	1.38949	0.891362	1275.61
7.6-18C-R4	5	17.3	7.626	31.9	2159.3	7.71059	1244.24	1248.62	2013.83	58.8423	44.2839	26.7221	1.08286	0	0	17.6325	1.43434	0.92013	1248.62
7.6-18C-R4	5.5	17.4	7.693	31.9	2137.19	7.77953	1039.47	1043.12	1969.57	67.6742	36.888	31.0094	1.28067	0	0	16.9479	1.64981	1.0586	1043.12
7.6-18C-R4	6	17.4	7.693	31.9	2137.19	7.77953	1039.47	1043.12	1969.57	67.6742	36.888	31.0094	1.28067	0	0	16.9479	1.64981	1.0586	1043.12
7.6-18C-R4	6.5	17.4	7.693	31.9	2137.19	7.77953	1039.47	1043.12	1969.57	67.6742	36.888	31.0094	1.28067	0	0	16.9479	1.64981	1.0586	1043.12
7.6-18C-R5	0	16.5	7.997	31.1	2105.1	8.10502	450.887	452.49	1815.28	125.222	16.5023	56.9362	2.45629	0	0	12.6969	3.06559	1.95878	452.49
7.6-18C-R5	0.4	17.3	7.622	31.1	2146.11	7.70637	1265.12	1269.57	2015.53	57.0297	45.2258	25.4942	1.05469	0	0	17.853	1.39748	0.894575	1269.57
7.6-18C-R5	0.8	17.3	7.651	31.1	2150.71	7.73679	1165.48	1169.58	1991.51	60.439	41.6639	27.2077	1.13122	0	0	17.6047	1.48102	0.948052	1169.58
7.6-18C-R5	1	17.3	7.647	31.1	2145.32	7.7326	1180.14	1184.3	1997.2	60.0291	42.1881	26.9654	1.12035	0	0	17.6464	1.47098	0.941624	1184.3
7.6-18C-R5	1.5	17.3	7.661	31.1	2152.3	7.74727	1142	1146.02	1999.04	62.1484	40.8246	27.8219	1.15883	0	0	17.5334	1.52291	0.974866	1146.02
7.6-18C-R5	2	17.4	7.672	31.1	2155.62	7.75761	1115.97	1119.9	1998.27	63.8343	39.7778	28.5015	1.19752	0	0	17.4238	1.56441	1.00167	1119.9
7.6-18C-R5	2.5	17.3	7.653	31.1	2149.44	7.73889	1164.27	1168.37	1999.07	60.9617	41.6208	27.3295	1.13668	0	0	17.6013	1.49383	0.956251	1168.37
7.6-18C-R5	3	17.5	7.663	31.1	2154.2	7.74702	1145.79	1149.81	1999.99	62.5591	40.7217	27.9267	1.17928	0	0	17.4994	1.53335	0.982014	1149.81
7.6-18C-R5	3.5	17.3	7.632	31.1	2149.28	7.71687	1228.98	1233.31	2005.86	58.1447	43.9341	26.0738	1.08049	0	0	17.7717	1.4248	0.912064	1233.31
7.6-18C-R5	4	17.3	7.642	31.1	2150.87	7.72736	1198.6	1202.82	2004.09	59.5135	42.8478	26.6652	1.10691	0	0	17.6966	1.45834	0.933536	1202.82
7.6-18C-R5	4.5	17.3	7.643	31.1	2151.03	7.7284	1195.6	1199.81	2003.91	59.6519	42.7407	26.725	1.10958	0	0	17.6888	1.46173	0.935707	1199.81
7.6-18C-R5	5	17.3	7.652	31.1	2152.45	7.73784	1168.94	1173.05	2002.25	60.9114	41.7876	27.2686	1.13395	0	0	17.615	1.49259	0.955463	1173.05
7.6-18C-R5	5.5	17.3	7.652	31.1	2152.45	7.73784	1168.94	1173.05	2002.25	60.9114	41.7876	27.2686	1.13395	0	0	17.615	1.49259	0.955463	1173.05
7.6-18C-R5	6	17.3	7.652	31.1	2152.45	7.73784	1168.94	1173.05	2002.25	60.9114	41.7876	27.2686	1.13395	0	0	17.615	1.49259	0.955463	1173.05
7.6-18C-R5	6.5	17.3	7.652	31.1	2152.45	7.73784	1168.94	1173.05	2002.25	60.9114	41.7876	27.2686	1.13395	0	0	17.615	1.49259	0.955463	1173.05
7.6-18C-R6	0	16.5	7.987	31.1	2105.1	8.09476	458.761	460.392	1803.85	121.528	16.7905	55.8075	2.39893	0	0	12.817	2.97516	1.901	460.392
7.6-18C-R6	0.4	17.2	7.608	31.1	2145.48	7.6928	1300.13	1304.71	2009.9	54.9382	46.6136	24.7094	1.01306	0	0	17.9335	1.34606	0.86146	1304.71
7.6-18C-R6	0.8	17.2	7.604	31.1	2144.85	7.6886	1313.19	1317.82	2010.53	54.4257	47.0817	24.4871	1.0033	0	0	17.9547	1.3335	0.853424	1317.82
7.6-18C-R6	1	17.2	7.643	31.1	2151.03	7.72956	1191.1	1195.3	2003.98	59.6141	42.7046	26.7337	1.10254	0	0	17.6983	1.46063	0.934782	1195.3
7.6-18C-R6	1.5	17.2	7.645	31.1	2151.35	7.73166	1185.15	1189.33	2003.62	59.8919	42.4911	26.8538	1.10787	0	0	17.6823	1.46743	0.939138	1189.33
7.6-18C-R6	2	17.3	7.652	31.1	2152.45	7.73784	1168.94	1173.05	2002.25	60.9114	41.7876	27.2686	1.13395	0	0	17.615	1.49259	0.955463	1173.05
7.6-18C-R6	2.5	17.2	7.649	31.1	2151.98	7.73586	1173.32	1177.46	2002.88	60.4512	42.067	27.0954	1.11863	0	0	17.6496	1.48114	0.947907	1177.46
7.6-18C-R6	3	17.5	7.641	31.1	2150.71	7.724	1210.67	1214.93	2004.12	59.4509	43.0279	26.5883	1.11838	0	0	17.6853	1.45717	0.933222	1214.93
7.6-18C-R6	3.5	17.3	7.63	31.1	2148.97	7.71477	1235.15	1239.5	2006.21	57.8744	44.1545	25.957	1.07528	0	0	17.7859	1.41818	0.907825	1239.5
7.6-18C-R6	4	17.1	7.613	31.1	2146.27	7.6992	1279.21	1283.72	2009.18	55.5474	45.9979	24.9971	1.01884	0	0	17.9153	1.36082	0.870706	1283.72
7.6-18C-R6	4.5	17.2	7.622	31.1	2147.7	7.70752	1255.41	1259.84	2007.64	56.7669	45.0102	25.502	1.04797	0	0	17.8498	1.39087	0.890136	1259.84
7.6-18C-R6	5	17.4	7.627	31.1	2145.32	7.71047	1247.25	1251.64	2003.65	57.4229	44.4572	25.7747	1.07436	0	0	17.7919	1.40729	0.901065	1251.64
7.6-18C-R6	5.5	17.4	7.627	31.1	2145.32	7.71047	1247.25	1251.64	2003.65	57.4229	44.4572	25.7747	1.07436	0	0	17.7919	1.40729	0.901065	1251.64
7.6-18C-R6	6	17.4	7.627	31.1	2145.32	7.71047	1247.25	1251.64	2003.65	57.4229	44.4572	25.7747	1.07436	0	0	17.7919	1.40729	0.901065	1251.64
7.6-18C-R6	6.5	17.4	7.627	31.1	2145.32	7.71047	1247.25	1251.64	2003.65	57.4229	44.4572	25.7747	1.07436	0	0	17.7919	1.40729	0.901065	1251.64
8.0-18C-R1	0	16.2	8.027	31.8	2051.88	8.13929	392.823	394.225	1726.54	130.127	14.4496	62.4661	2.62408	0	0	11.9702	3.17038	2.02816	394.225
8.0-18C-R1	0.4	17.3	8.011	31.8	2059.36	8.10855	430.977	432.495	1742.63	126.946	15.3474	60.1413	2.70167	0	0	12.1848	3.09647	1.98588	432.495
8.0-18C-R1	0.8	17.5	8.015	31.8	2070.25	8.11003	432.18	433.698	1749.48	128.734	15.3008	60.5486	2.76031	0	0	12.1392	3.14081	2.01527	433.698
8.0-18C-R1	1	17.3	8.023	31.8	2072.02	8.1208	419.802	421.28	1746.01	130.831	14.9494	61.5815	2.77897	0	0	12.0326	3.19124	2.04666	421.28
8.0-18C-R1	1.5	17.5	8.029	31.8	2083.36	8.12431	418.766	420.236	1751.84	133.217	14.8259	62.2391	2.85258	0	0	11.9601	3.25018	2.08544	420.236
8.0-18C-R1	2	17.2	8.041	31.8	2086.02	8.14047	400.841	402.254	1746.39	136.467	14.316	63.829	2.88155	0	0	11.8025	3.32835	2.1341	402.254
8.0-18C-R1	2.5	17.5	8.043	31.8	2096.47	8.13858	405.706	407.131	1753.9	137.83	14.3635	63.9661	2.94788	0	0	11.7835	3.36272	2.15765	407.131
8.0-18C-R1	3	17.5	8.05	31.8	2098.03	8.14571	398.332	399.731	1750.51	139.839	14.1024	64.8427	2.99665	0	0	11.689	3.41175	2.18911	399.731
8.0-18C-R1	3.5	16.9	8.017	31.8	2050.69	8.11988	415.287	416.756	1731.51	127.757	14.9629	60.9984	2.67449	0	0	12.0948	3.11489	1.99584	416.756
8.0-18C-R1	4	16.9	8.017	31.8	2060.69	8.1199	417.362	418.838	1740.22	128.404	15.0377	61	2.67457	0	0	12.1104	3.13065	2.00594	418.838
8.0-18C-R1	4.5	16.6	8.009	31.8	2058.91	8.11566	420.894	422.389	1743.89	126.153	15.2996	60.1494	2.57737	0	0	12.2304	3.07479	1.96879	422.389
8.0-18C-R1	5	16.8	7.995	31.8	2073.58	8.09875	443.993	445.566	1765.32	123.653	16.0444	58.4363	2.52447	0	0	12.453	3.0145	1.93107	445.566
8.0-18C-R1	5.5	16.8	7.995	31.8	2083.58	8.09877	446.184	447.765	1774.08	124.27	16.1235	58.4378	2.52455	0	0	12.4688	3.02956	1.94072	447.765
8.0-18C-R1	6	16.8	7.995	31.8	2083.58	8.09877	446.184	447.765	1774.08	124.27	16.1235	58.4378	2.52455	0	0	12.4688	3.02956	1.94072	447.765
8.0-18C-R1	6.5	16.8	7.995	31.8	2083.58	8.09877	446.184	447.765	1774.08	124.27	16.1235	58.4378	2.52455	0	0	12.4688	3.02956	1.94072	447.765
8.0-18C-R2	0	15.8	8.027	31.8	2051.88	8.14458	386.336	387.722	1726.76	129.975	14.3818	62.6131	2.56072	0	0	11.9792	3.16546	2.02321	387.722
8.0-18C-R2	0.4	17.3	8.005	31.8	2058.02	8.10242	437.746	439.287	1745.22	125.355	15.5884	59.4321	2.66386	0	0	12.2694	3.05768	1.96101	439.287
8.0-18C-R2	0.8	17.4	8.012	31.8	2069.58	8.10828	433.778	435.303	1750.86	127.89	15.4021	60.2265	2.72448	0	0	12.1838	3.11986	2.00135	435.303
8.0-18C-R2	1	17.4	8.021	31.8	2061.58	8.11744	421.641	423.123	1738.16	129.671	14.9712	61.3024	2.78258	0	0	12.0426	3.16329	2.02921	423.123
8.0-18C-R2	1.5	17.5	8.027	31.8	2082.91	8.12227	420.956	422.434	1752.76	132.663	14.9034	61.9956	2.83923	0	0	11.9876	3.23667	2.07677	422.434
8.0-18C-R2	2	17.4	8.04	31.8	2085.8	8.13682	405.227	406.652	1746.75	136.26	14.3884	63.6293	2.9096	0	0	11.8117	3.32403	2.13233	406.652
8.0-18C-R2	2.5	17.4	8.042	31.8	2096.25	8.13887	405.094	406.518	1754.44	137.507	14.3836	63.8794	2.92336	0	0	11.7993	3.35445	2.15184	406.518
8.0-18C-R2	3	17.4	8.049	31.8	2077.8	8.14598	393.84	395.225	1733.82	138.132	13.9841	64.7521	2.97156	0	0	11.6751	3.3697	2.16162	395.225
8.0-18C-R2	3.5	16.9	8.017	31.8	2060.69	8.1199	417.362	418.838	1740.22	128.404	15.0377	61	2.67457	0	0	12.1104	3.13065	2.00594	418.838
8.0-18C-R2	4	16.8	8.015	31.8	2075.25	8.11919	420.927	422.418	1754.22	128.794	15.2108	60.798	2.64607	0	0	12.1641	3.13984	2.01136	422.418
8.0-18C-R2	4.5	16.7	8.01	31.8	2059.14	8.11537	421.54	423.035	1743.4	126.456	15.2779	60.2333	2.59919	0	0	12.2137	3.08251	1.97418	423.035
8.0-18C-R2	5	16.8	7.993	31.8	2065.36	8.0967	444.589	446.164	1759.34	122.653	16.0659	58.203	2.51256	0	0	12.4695	2.99012	1.91545	446.164
8.0-18C-R2	5.5	16.8	7.993	31.8	2075.36	8.09671	446.791	448.374	1768.11	123.268	16.1454	58.2045	2.51263	0	0	12.4853	3.00511	1.92506	448.374
8.0-18C-R2	6	16.8	7.993	31.8	2075.36	8.09671	446.791	448.374	1768.11	123.268	16.1454	58.2045	2.51263	0	0	12.4853	3.00511	1.92506	448.374
8.0-18C-R2	6.5	16.8	7.993	31.8	2075.36	8.09671	446.791	448.374	1768.11	123.268	16.1454	58.2045	2.51263	0	0	12.4853	3.00511	1.92506	448.374
8.0-18C-R3	0	16.3	8.051	31.9	2100	8.16251	377.865	379.212	1751.29	140.098	13.8505	65.726	2.79929	0	0	11.6792	3.41145	2.18342	379.212
8.0-18C-R3	0.4	17.3	8.017	31.9	2106.29	8.11469	433.425	434.951	1778.83	131.796	15.426	61.1378	2.74584	0	0	12.1451	3.21265	2.06092	434.951
8.0-18C-R3	0.8	16.6	8.043	31.9	2112.09	8.1504	393.385	394.782	1766.99	138.857	14.2917	64.5987	2.7978	0	0	11.8017	3.38225	2.16621	394.782
8.0-18C-R3	1	16.7	8.039	31.9	2141.2	8.14504	405.001	406.438	1794.79	139.78	14.6704	64.0638	2.78874	0	0	11.8978	3.40507	2.18133	406.438
8.0-18C-R3	1.5	16.8	8.033	31.9	2169.86	8.13765	419.058	420.543	1823.63	140.094	15.1349	63.2843	2.76666	0	0	12.0213	3.41309	2.18696	420.543
8.0-18C-R3	2	16.4	8.038	31.9	2170.98	8.14802	406.786	408.234	1821.39	141.401	14.8663	64.0579	2.73229	0	0	11.961	3.44351	2.20444	408.234
8.0-18C-R3	2.5	16.4	8.042	31.9	2171.87	8.15211	402.538	403.971	1819.4	142.58	14.7111	64.5599	2.7581	0	0	11.9058	3.47223	2.22283	403.971
8.0-18C-R3	3	16.8	8.037	31.9	2170.75	8.14173	414.691	416.16	1821.66	141.264	14.9772	63.7811	2.79278	0	0	11.9659	3.44158	2.20522	416.16
8.0-18C-R3	3.5	16.8	8.057	31.9	2175.21	8.16212	393.467	394.861	1811.52	147.231	14.2106	66.3108	2.92704	0	0	11.6928	3.58696	2.29837	394.861
8.0-18C-R3	4	17.2	8.04	31.9	2171.42	8.13952	418.321	419.795	1819.94	142.302	14.932	64.0035	2.88124	0	0	11.9154	3.46837	2.22444	419.795
8.0-18C-R3	4.5	16.9	8.017	31.9	2166.29	8.12	438.764	440.316	1831.27	135.532	15.8001	61.2907	2.68074	0	0	12.2433	3.30229	2.11645	440.316
8.0-18C-R3	5	17	7.998	31.9	2162.06	8.09929	462.913	464.548	1839.96	130.267	16.6208	58.9949	2.57917	0	0	12.5124	3.17434	2.03492	464.548
8.0-18C-R3	5.5	17.3	7.993	31.9	2152.02	8.09026	472.779	474.444	1834.2	128.465	16.8267	58.3082	2.59563	0	0	12.5633	3.13145	2.00883	474.444
8.0-18C-R3	6	17.3	7.993	31.9	2152.02	8.09026	472.779	474.444	1834.2	128.465	16.8267	58.3082	2.59563	0	0	12.5633	3.13145	2.00883	474.444
8.0-18C-R3	6.5	17.3	7.993	31.9	2152.02	8.09026	472.779	474.444	1834.2	128.465	16.8267	58.3082	2.59563	0	0	12.5633	3.13145	2.00883	474.444
8.0-18C-R4	0	16.3	8.051	31.9	2100	8.16251	377.865	379.212	1751.29	140.098	13.8505	65.726	2.79929	0	0	11.6792	3.41145	2.18342	379.212
8.0-18C-R4	0.4	17.4	8.024	31.9	2167.85	8.12059	439.813	441.359	1827.65	137.723	15.6078	61.9573	2.80866	0	0	12.1326	3.35751	2.15435	441.359
8.0-18C-R4	0.8	16.8	8.038	31.9	2170.98	8.14275	413.605	415.07	1821.16	141.558	14.938	63.9059	2.79935	0	0	11.952	3.44874	2.20981	415.07
8.0-18C-R4	1	16.8	8.032	31.9	2169.64	8.13662	420.158	421.646	1824.12	139.803	15.1746	63.1605	2.76016	0	0	12.0352	3.40599	2.18241	421.646
8.0-18C-R4	1.5	16.8	8.035	31.9	2170.31	8.13969	416.87	418.346	1822.65	140.678	15.0559	63.5323	2.77969	0	0	11.9935	3.42731	2.19607	418.346
8.0-18C-R4	2	16.5	8.036	31.9	2170.53	8.14466	410.63	412.09	1822.32	140.853	14.9624	63.7702	2.73604	0	0	11.9865	3.43052	2.19663	412.09
8.0-18C-R4	2.5	16.4	8.04	31.9	2171.42	8.15007	404.657	406.097	1820.4	141.99	14.7885	64.3086	2.74517	0	0	11.9334	3.45785	2.21362	406.097
8.0-18C-R4	3	16.8	8.038	31.9	2170.98	8.14275	413.605	415.07	1821.16	141.558	14.938	63.9059	2.79935	0	0	11.952	3.44874	2.20981	415.07
8.0-18C-R4	3.5	17.3	8.055	31.9	2174.77	8.15349	403.839	405.261	1812.27	146.821	14.373	65.8576	3.00241	0	0	11.7092	3.57889	2.29587	405.261
8.0-18C-R4	4	17.2	8.041	31.9	2171.65	8.14054	417.225	418.696	1819.44	142.598	14.8929	64.1285	2.88801	0	0	11.9017	3.47557	2.22906	418.696
8.0-18C-R4	4.5	17.2	8.016	31.9	2166.07	8.11505	445.395	446.965	1831.56	135.365	15.8984	61.062	2.72338	0	0	12.2501	3.29928	2.116	446.965
8.0-18C-R4	5	17.2	7.993	31.9	2160.94	8.09157	472.835	474.502	1842.07	128.977	16.8779	58.3433	2.58005	0	0	12.5793	3.14358	2.01614	474.502
8.0-18C-R4	5.5	17.3	7.986	31.9	2150.46	8.08311	481.429	483.124	1837.26	126.578	17.1346	57.5006	2.55325	0	0	12.6648	3.08546	1.97933	483.124
8.0-18C-R4	6	17.3	7.986	31.9	2150.46	8.08311	481.429	483.124	1837.26	126.578	17.1346	57.5006	2.55325	0	0	12.6648	3.08546	1.97933	483.124
8.0-18C-R4	6.5	17.3	7.986	31.9	2150.46	8.08311	481.429	483.124	1837.26	126.578	17.1346	57.5006	2.55325	0	0	12.6648	3.08546	1.97933	483.124
8.0-18C-R5	0	15.8	7.987	31.1	2105.1	8.10396	445.655	447.254	1804.25	121.264	16.6547	56.0362	2.29854	0	0	12.8368	2.96644	1.89246	447.254
8.0-18C-R5	0.4	17.3	7.987	31.1	2114.95	8.08432	476.387	478.064	1812.06	122.416	17.03	55.549	2.51813	0	0	12.8093	2.99972	1.92023	478.064
8.0-18C-R5	0.8	17.1	8.002	31.1	2118.21	8.10226	454.487	456.091	1805.76	126.289	16.3425	57.3021	2.5773	0	0	12.5953	3.09387	1.97957	456.091
8.0-18C-R5	1	17.3	8.02	31.1	2122.12	8.11802	437.311	438.851	1797.62	131.238	15.6331	59.3109	2.72128	0	0	12.3307	3.2159	2.05861	438.851
8.0-18C-R5	1.5	17.4	8.048	31.1	2128.21	8.14525	408.167	409.602	1784.35	139.161	14.5487	62.6193	2.92363	0	0	11.9356	3.41048	2.18368	409.602
8.0-18C-R5	2	17.3	8.057	31.1	2130.16	8.15573	397	398.398	1779.96	141.738	14.1921	63.7627	2.96816	0	0	11.8145	3.4732	2.22332	398.398
8.0-18C-R5	2.5	17.1	8.06	31.1	2130.81	8.16143	390.629	392.008	1778.57	142.542	14.0463	64.2118	2.95347	0	0	11.778	3.49206	2.23435	392.008
8.0-18C-R5	3	17.4	8.064	31.1	2131.68	8.16154	391.385	392.761	1776.39	143.836	13.9506	64.5944	3.03539	0	0	11.7173	3.52505	2.25704	392.761
8.0-18C-R5	3.5	17.3	8.012	31.1	2120.38	8.10986	446.505	448.077	1801.23	129.053	15.9618	58.381	2.67061	0	0	12.4453	3.16236	2.02434	448.077
8.0-18C-R5	4	17.1	8.014	31.1	2120.82	8.11452	440.541	442.096	1800.45	129.521	15.841	58.6817	2.65106	0	0	12.4217	3.17306	2.03025	442.096
8.0-18C-R5	4.5	17.2	7.993	31.1	2116.25	8.09176	467.129	468.775	1809.58	123.945	16.7479	56.2514	2.53857	0	0	12.724	3.03683	1.94353	468.775
8.0-18C-R5	5	17.4	8	31.1	2117.56	8.0963	462.476	464.102	1806.27	125.855	16.4845	56.9742	2.612	0	0	12.6158	3.08439	1.97489	464.102
8.0-18C-R5	5.5	17.4	8	31.1	2117.56	8.0963	462.476	464.102	1806.27	125.855	16.4845	56.9742	2.612	0	0	12.6158	3.08439	1.97489	464.102
8.0-18C-R5	6	17.4	8	31.1	2117.56	8.0963	462.476	464.102	1806.27	125.855	16.4845	56.9742	2.612	0	0	12.6158	3.08439	1.97489	464.102
8.0-18C-R5	6.5	17.4	8	31.1	2117.56	8.0963	462.476	464.102	1806.27	125.855	16.4845	56.9742	2.612	0	0	12.6158	3.08439	1.97489	464.102
8.0-18C-R6	0	16.5	7.987	31.1	2105.1	8.09476	458.761	460.392	1803.85	121.528	16.7905	55.8075	2.39893	0	0	12.817	2.97516	1.901	460.392
8.0-18C-R6	0.4	17.2	7.98	31.1	2111.25	8.07847	482.585	484.286	1813.1	120.443	17.3021	54.8074	2.46205	0	0	12.9123	2.95103	1.88862	484.286
8.0-18C-R6	0.8	17.2	7.984	31.1	2114.3	8.08256	478.128	479.813	1813.37	121.601	17.1423	55.2488	2.48537	0	0	12.8565	2.9794	1.90678	479.813
8.0-18C-R6	1	17.3	8.005	31.1	2118.86	8.10271	454.693	456.294	1804.33	127.166	16.2545	57.5768	2.62703	0	0	12.5463	3.11611	1.99473	456.294
8.0-18C-R6	1.5	17.2	8.026	31.1	2123.42	8.12545	428.757	430.268	1794.92	132.859	15.3722	60.0514	2.74336	0	0	12.2479	3.25522	2.0833	430.268
8.0-18C-R6	2	17.2	8.045	31.1	2127.55	8.14482	407.995	409.433	1785.92	138.223	14.6278	62.3287	2.86851	0	0	11.9816	3.38665	2.16741	409.433
8.0-18C-R6	2.5	17.2	8.049	31.1	2128.42	8.1489	403.743	405.166	1783.97	139.374	14.4754	62.8164	2.89555	0	0	11.9264	3.41486	2.18546	405.166
8.0-18C-R6	3	17.5	8.04	31.1	2126.47	8.13578	418.526	419.996	1788.16	136.908	14.8746	61.6126	2.88652	0	0	12.0441	3.35567	2.14909	419.996
8.0-18C-R6	3.5	17.3	8.048	31.1	2128.21	8.14656	406.481	407.912	1784.4	139.124	14.531	62.6568	2.90616	0	0	11.9379	3.40913	2.18231	407.912
8.0-18C-R6	4	17.1	8.051	31.1	2128.86	8.15226	399.97	401.381	1783.05	139.915	14.3822	63.0992	2.89175	0	0	11.9011	3.42769	2.19316	401.381
8.0-18C-R6	4.5	17.3	7.994	31.1	2116.47	8.09148	467.84	469.487	1809.1	124.245	16.7245	56.3307	2.55994	0	0	12.7065	3.04455	1.94893	469.487
8.0-18C-R6	5	17.4	8.001	31.1	2117.99	8.09732	461.327	462.949	1806.02	126.135	16.4436	57.0877	2.61815	0	0	12.6016	3.09123	1.97927	462.949
8.0-18C-R6	5.5	17.4	8.001	31.1	2117.99	8.09732	461.327	462.949	1806.02	126.135	16.4436	57.0877	2.61815	0	0	12.6016	3.09123	1.97927	462.949
8.0-18C-R6	6	17.4	8.001	31.1	2117.99	8.09732	461.327	462.949	1806.02	126.135	16.4436	57.0877	2.61815	0	0	12.6016	3.09123	1.97927	462.949
8.0-18C-R6	6.5	17.4	8.001	31.1	2117.99	8.09732	461.327	462.949	1806.02	126.135	16.4436	57.0877	2.61815	0	0	12.6016	3.09123	1.97927	462.949
8.4-18C-R1	0	15.8	8.027	31.8	2051.88	8.14458	386.336	387.722	1726.76	129.975	14.3818	62.6131	2.56072	0	0	11.9792	3.16546	2.02321	387.722
8.4-18C-R1	0.4	17.3	8.464	31.8	2387.98	8.5681	135.851	136.329	1582.57	332.145	4.83773	133.333	7.78364	0	0	8.00489	8.10169	5.19592	136.329
8.4-18C-R1	0.8	17.4	8.486	31.8	2395.03	8.58897	127.76	128.209	1559.82	344.634	4.53636	137.71	8.24101	0	0	7.89047	8.40728	5.39317	128.209
8.4-18C-R1	1	17.4	8.469	31.8	2389.58	8.57177	134.421	134.894	1577.42	334.989	4.77289	134.264	7.92099	0	0	7.97746	8.17199	5.24223	134.894
8.4-18C-R1	1.5	17.5	8.479	31.8	2392.79	8.5805	131.03	131.491	1567.07	340.68	4.63896	136.209	8.15513	0	0	7.9248	8.31178	5.33316	131.491
8.4-18C-R1	2	17.4	8.468	31.8	2389.26	8.57076	134.822	135.296	1578.44	334.426	4.78712	134.062	7.90257	0	0	7.98274	8.15828	5.23344	135.296
8.4-18C-R1	2.5	17.5	8.472	31.8	2390.54	8.57342	133.799	134.269	1574.3	336.716	4.73698	134.793	8.02323	0	0	7.96087	8.21507	5.27111	134.269
8.4-18C-R1	3	17.4	8.46	31.8	2386.69	8.56267	138.067	138.553	1586.59	329.946	4.90235	132.455	7.75665	0	0	8.02559	8.04897	5.16332	138.553
8.4-18C-R1	3.5	16.9	8.463	31.8	2387.65	8.57263	133.926	134.4	1583.77	331.435	4.82541	133.436	7.58557	0	0	8.01371	8.08083	5.17772	134.4
8.4-18C-R1	4	16.8	8.463	31.8	2387.65	8.57402	133.35	133.822	1583.81	331.397	4.81879	133.512	7.54111	0	0	8.01456	8.07904	5.17538	133.822
8.4-18C-R1	4.5	16.7	8.465	31.8	2388.3	8.57743	131.987	132.455	1581.82	332.479	4.78363	133.991	7.5319	0	0	8.0047	8.10457	5.19055	132.455
8.4-18C-R1	5	16.8	8.427	31.8	2376.1	8.53757	148.302	148.827	1619.6	311.605	5.3591	126.36	6.93404	0	0	8.21984	7.59654	4.8663	148.827
8.4-18C-R1	5.5	16.8	8.427	31.8	2376.1	8.53757	148.302	148.827	1619.6	311.605	5.3591	126.36	6.93404	0	0	8.21984	7.59654	4.8663	148.827
8.4-18C-R1	6	16.8	8.427	31.8	2376.1	8.53757	148.302	148.827	1619.6	311.605	5.3591	126.36	6.93404	0	0	8.21984	7.59654	4.8663	148.827
8.4-18C-R1	6.5	16.8	8.427	31.8	2376.1	8.53757	148.302	148.827	1619.6	311.605	5.3591	126.36	6.93404	0	0	8.21984	7.59654	4.8663	148.827
8.4-18C-R2	0	15.8	8.027	31.8	2051.88	8.14458	386.336	387.722	1726.76	129.975	14.3818	62.6131	2.56072	0	0	11.9792	3.16546	2.02321	387.722
8.4-18C-R2	0.4	17.4	8.483	31.8	2374.07	8.58592	127.774	128.223	1549.07	339.863	4.53685	137.096	8.18332	0	0	7.89008	8.2909	5.31851	128.223
8.4-18C-R2	0.8	17.5	8.481	31.8	2373.06	8.58251	129.075	129.528	1550.83	338.712	4.56972	136.612	8.19292	0	0	7.89896	8.26377	5.30236	129.528
8.4-18C-R2	1	17.5	8.485	31.8	2384.71	8.58657	128.128	128.578	1553.89	342.564	4.53619	137.427	8.26976	0	0	7.88693	8.35775	5.36265	128.578
8.4-18C-R2	1.5	17.5	8.477	31.8	2401.77	8.57849	132.378	132.843	1575.85	341.002	4.68666	135.805	8.11736	0	0	7.94239	8.31964	5.33821	132.843
8.4-18C-R2	2	17.4	8.482	31.8	2393.75	8.58492	129.301	129.755	1563.99	342.351	4.59108	136.896	8.16457	0	0	7.91048	8.35159	5.35744	129.755
8.4-18C-R2	2.5	17.5	8.472	31.8	2390.54	8.57342	133.799	134.269	1574.3	336.716	4.73698	134.793	8.02323	0	0	7.96087	8.21507	5.27111	134.269
8.4-18C-R2	3	17.4	8.459	31.8	2386.37	8.56165	138.478	138.965	1587.6	329.388	4.91692	132.255	7.7386	0	0	8.03103	8.03536	5.15459	138.965
8.4-18C-R2	3.5	17	8.47	31.8	2389.9	8.57833	131.731	132.196	1576.57	335.404	4.73239	134.771	7.75577	0	0	7.97566	8.17848	5.24151	132.196
8.4-18C-R2	4	16.9	8.479	31.8	2392.79	8.58883	127.684	128.135	1567.33	340.46	4.60048	136.672	7.87386	0	0	7.93	8.30087	5.31871	128.135
8.4-18C-R2	4.5	17	8.471	31.8	2390.22	8.57934	131.339	131.803	1575.54	335.967	4.7183	134.973	7.77385	0	0	7.97042	8.19222	5.25031	131.803
8.4-18C-R2	5	17.1	8.426	31.8	2375.78	8.53241	150.668	151.2	1620.43	311.183	5.39686	125.945	7.04109	0	0	8.22328	7.5887	4.86465	151.2
8.4-18C-R2	5.5	17.1	8.426	31.8	2375.78	8.53241	150.668	151.2	1620.43	311.183	5.39686	125.945	7.04109	0	0	8.22328	7.5887	4.86465	151.2
8.4-18C-R2	6	17.1	8.426	31.8	2375.78	8.53241	150.668	151.2	1620.43	311.183	5.39686	125.945	7.04109	0	0	8.22328	7.5887	4.86465	151.2
8.4-18C-R2	6.5	17.1	8.426	31.8	2375.78	8.53241	150.668	151.2	1620.43	311.183	5.39686	125.945	7.04109	0	0	8.22328	7.5887	4.86465	151.2
8.4-18C-R3	0	16.3	8.051	31.9	2060.82	8.16245	370.638	371.959	1717.55	137.38	13.5855	65.7185	2.79891	0	0	11.6211	3.34526	2.14106	371.959
8.4-18C-R3	0.4	17.3	8.481	31.9	2344.86	8.58522	126.139	126.583	1529.66	334.881	4.4894	137.331	8.11337	0	0	7.86768	8.16305	5.23661	126.583
8.4-18C-R3	0.8	16.8	8.424	31.9	2343.64	8.53446	147.282	147.804	1598.17	306.139	5.31932	126.295	6.8987	0	0	8.19973	7.4584	4.77902	147.804
8.4-18C-R3	1	16.8	8.422	31.9	2343	8.53243	148.147	148.672	1600.08	305.078	5.35054	125.902	6.86661	0	0	8.21183	7.43254	4.76246	148.672
8.4-18C-R3	1.5	16.8	8.446	31.9	2390.72	8.55677	140.535	141.033	1605.35	323.726	5.07563	130.657	7.2624	0	0	8.10349	7.88688	5.05358	141.033
8.4-18C-R3	2	16.5	8.483	31.9	2392.63	8.5984	123.706	124.145	1560.65	342.918	4.50755	138.368	7.77794	0	0	7.90121	8.35186	5.34785	124.145
8.4-18C-R3	2.5	16.5	8.46	31.9	2395.23	8.57511	133.088	133.562	1591.36	331.406	4.84945	133.692	7.37181	0	0	8.02852	8.07148	5.16832	133.562
8.4-18C-R3	3	16.8	8.453	31.9	2392.98	8.56386	137.654	138.142	1598.32	327.611	4.97159	132.057	7.38188	0	0	8.06429	7.98151	5.11421	138.142
8.4-18C-R3	3.5	16.9	8.426	31.9	2384.28	8.53514	149.696	150.226	1625.05	312.82	5.39062	126.622	6.97254	0	0	8.21957	7.62197	4.88496	150.226
8.4-18C-R3	4	17.2	8.41	31.9	2379.13	8.51481	158.891	159.451	1640.32	304.346	5.67162	123.283	6.83695	0	0	8.31582	7.41791	4.75749	159.451
8.4-18C-R3	4.5	17.2	8.423	31.9	2383.32	8.52796	152.976	153.515	1627.83	311.315	5.4605	125.815	7.04719	0	0	8.23513	7.58777	4.86642	153.515
8.4-18C-R3	5	17.2	8.398	31.9	2375.27	8.50267	164.524	165.104	1651.66	298	5.8727	120.969	6.64847	0	0	8.39312	7.26324	4.65829	165.104
8.4-18C-R3	5.5	17.4	8.334	31.9	2354.67	8.43518	199.268	199.969	1708.63	265.673	7.0715	108.905	5.79541	0	0	8.85025	6.47675	4.15582	199.969
8.4-18C-R3	6	17.4	8.334	31.9	2354.67	8.43518	199.268	199.969	1708.63	265.673	7.0715	108.905	5.79541	0	0	8.85025	6.47675	4.15582	199.969
8.4-18C-R3	6.5	17.4	8.334	31.9	2354.67	8.43518	199.268	199.969	1708.63	265.673	7.0715	108.905	5.79541	0	0	8.85025	6.47675	4.15582	199.969
8.4-18C-R4	0	16.3	8.051	31.9	2060.82	8.16245	370.638	371.959	1717.55	137.38	13.5855	65.7185	2.79891	0	0	11.6211	3.34526	2.14106	371.959
8.4-18C-R4	0.4	17.4	8.464	31.9	2388.71	8.56667	136.249	136.728	1581.38	332.835	4.83513	133.814	7.84471	0	0	7.99325	8.11407	5.20641	136.728
8.4-18C-R4	0.8	16.9	8.463	31.9	2386.19	8.57258	133.614	134.086	1581.08	331.762	4.81148	133.992	7.60042	0	0	8.00119	8.08351	5.18077	134.086
8.4-18C-R4	1	16.9	8.438	31.9	2358.15	8.54726	142.599	143.104	1591.81	315.091	5.13505	128.985	7.16984	0	0	8.12438	7.67732	4.92043	143.104
8.4-18C-R4	1.5	16.8	8.459	31.9	2384.91	8.56992	134.63	135.107	1585.19	329.489	4.86236	133.261	7.48571	0	0	8.02358	8.02727	5.14353	135.107
8.4-18C-R4	2	16.5	8.477	31.9	2400.7	8.59233	126.507	126.957	1573.85	341.019	4.60965	137.143	7.67	0	0	7.93914	8.30561	5.31824	126.957
8.4-18C-R4	2.5	16.7	8.454	31.9	2393.3	8.56626	136.656	137.141	1597.35	328.129	4.95009	132.333	7.35567	0	0	8.05961	7.99331	5.1206	137.141
8.4-18C-R4	3	16.8	8.452	31.9	2392.65	8.56284	138.063	138.552	1599.33	327.054	4.98635	131.857	7.36469	0	0	8.06983	7.96795	5.10552	138.552
8.4-18C-R4	3.5	17	8.43	31.9	2385.57	8.53781	148.588	149.113	1621.1	315.03	5.33503	127.336	7.07939	0	0	8.19472	7.67664	4.92114	149.113
8.4-18C-R4	4	17.2	8.412	31.9	2379.78	8.51683	157.968	158.525	1638.42	305.412	5.63869	123.671	6.86888	0	0	8.30321	7.44389	4.77415	158.525
8.4-18C-R4	4.5	17.2	8.421	31.9	2382.67	8.52594	153.874	154.416	1629.77	310.236	5.49254	125.424	7.01442	0	0	8.24735	7.56147	4.84956	154.416
8.4-18C-R4	5	17.2	8.394	31.9	2373.98	8.49862	166.439	167.026	1655.39	295.904	5.94107	120.203	6.58681	0	0	8.41949	7.21214	4.62552	167.026
8.4-18C-R4	5.5	17.5	8.337	31.9	2355.63	8.43685	198.428	199.125	1706.03	267.177	7.02122	109.383	5.87048	0	0	8.82599	6.51417	4.18081	199.125
8.4-18C-R4	6	17.5	8.337	31.9	2355.63	8.43685	198.428	199.125	1706.03	267.177	7.02122	109.383	5.87048	0	0	8.82599	6.51417	4.18081	199.125
8.4-18C-R4	6.5	17.5	8.337	31.9	2355.63	8.43685	198.428	199.125	1706.03	267.177	7.02122	109.383	5.87048	0	0	8.82599	6.51417	4.18081	199.125
8.4-18C-R5	0	16.5	7.987	31.1	2105.1	8.09476	458.761	460.392	1803.85	121.528	16.7905	55.8075	2.39893	0	0	12.817	2.97516	1.901	460.392
8.4-18C-R5	0.4	17.3	8.458	31.1	2366.3	8.5623	138.732	139.22	1586.23	322.115	4.95942	128.279	7.56932	0	0	8.10387	7.89322	5.05273	139.22
8.4-18C-R5	0.8	17.2	8.45	31.1	2343.79	8.55558	140.177	140.671	1579.92	314.851	5.02574	126.793	7.38597	0	0	8.13432	7.71427	4.93703	140.671
8.4-18C-R5	1	17.3	8.423	31.1	2325.32	8.52686	151.69	152.224	1598.48	299.167	5.42265	121.535	6.97618	0	0	8.28737	7.33088	4.69276	152.224
8.4-18C-R5	1.5	17.3	8.423	31.1	2315.32	8.52685	151.004	151.535	1591.21	297.8	5.39812	121.533	6.97603	0	0	8.27894	7.2974	4.67133	151.535
8.4-18C-R5	2	17.3	8.419	31.1	2314.07	8.52281	152.774	153.311	1594.93	295.726	5.46139	120.774	6.91131	0	0	8.30407	7.24659	4.6388	153.311
8.4-18C-R5	2.5	17.3	8.427	31.1	2316.58	8.5309	149.252	149.777	1587.48	299.883	5.3355	122.294	7.04134	0	0	8.25412	7.34843	4.70399	149.777
8.4-18C-R5	3	17.5	8.435	31.1	2319.09	8.53623	147.057	147.574	1579.86	304.148	5.22648	123.68	7.25807	0	0	8.20357	7.45481	4.77433	147.574
8.4-18C-R5	3.5	17.3	8.424	31.1	2315.63	8.52786	150.564	151.094	1590.28	298.32	5.38241	121.723	6.99229	0	0	8.27271	7.31013	4.67948	151.094
8.4-18C-R5	4	17.3	8.398	31.1	2307.48	8.50156	162.361	162.932	1614.09	284.989	5.80411	116.831	6.58132	0	0	8.44091	6.98348	4.47037	162.932
8.4-18C-R5	4.5	17.2	8.41	31.1	2311.24	8.51508	156.15	156.7	1603.26	291.056	5.59842	119.146	6.72839	0	0	8.36259	7.13127	4.56392	156.7
8.4-18C-R5	5	17.4	8.422	31.1	2315.01	8.52446	152.096	152.63	1592.1	297.318	5.42131	121.272	7.00059	0	0	8.2843	7.28649	4.66544	152.63
8.4-18C-R5	5.5	17.4	8.422	31.1	2315.01	8.52446	152.096	152.63	1592.1	297.318	5.42131	121.272	7.00059	0	0	8.2843	7.28649	4.66544	152.63
8.4-18C-R5	6	17.4	8.432	31.1	2315.01	8.53457	147.509	148.027	1580.47	302.1	5.25781	123.177	7.16554	0	0	8.21998	7.40368	4.74047	148.027
8.4-18C-R5	6.5	17.4	8.432	31.1	2315.01	8.53457	147.509	148.027	1580.47	302.1	5.25781	123.177	7.16554	0	0	8.21998	7.40368	4.74047	148.027
8.4-18C-R6	0	16.5	7.987	31.1	2105.1	8.09476	458.761	460.392	1803.85	121.528	16.7905	55.8075	2.39893	0	0	12.817	2.97516	1.901	460.392
8.4-18C-R6	0.4	17.2	8.467	31.1	2369.13	8.5728	134.5	134.974	1577.26	327.036	4.82223	130.115	7.68474	0	0	8.05478	8.01282	5.1281	134.974
8.4-18C-R6	0.8	17.2	8.451	31.1	2354.11	8.5566	140.392	140.887	1586.08	316.822	5.03348	126.989	7.40336	0	0	8.13663	7.76256	4.96794	140.887
8.4-18C-R6	1	17.2	8.422	31.1	2335.01	8.52724	152.166	152.703	1606.73	299.971	5.45562	121.417	6.91947	0	0	8.30292	7.34969	4.70371	152.703
8.4-18C-R6	1.5	17.3	8.417	31.1	2323.44	8.52079	154.364	154.907	1604.07	296.046	5.51823	120.397	6.87933	0	0	8.32523	7.25441	4.6438	154.907
8.4-18C-R6	2	17.3	8.419	31.1	2324.07	8.52281	153.468	154.008	1602.21	297.083	5.48622	120.776	6.91146	0	0	8.31254	7.27984	4.66008	154.008
8.4-18C-R6	2.5	17.2	8.429	31.1	2327.2	8.53432	148.418	148.941	1592.89	302.27	5.32122	122.749	7.03311	0	0	8.25109	7.40602	4.73975	148.941
8.4-18C-R6	3	17.3	8.44	31.1	2340.66	8.54407	144.984	145.494	1589.57	309.523	5.18292	124.788	7.25816	0	0	8.19198	7.58467	4.85522	145.494
8.4-18C-R6	3.5	17.4	8.427	31.1	2316.58	8.52952	149.894	150.421	1587.43	299.92	5.34282	122.223	7.08261	0	0	8.25322	7.35025	4.70626	150.421
8.4-18C-R6	4	17.2	8.398	31.1	2307.48	8.50294	161.666	162.236	1614.13	284.951	5.79622	116.9	6.54286	0	0	8.44182	6.98168	4.46818	162.236
8.4-18C-R6	4.5	17.2	8.407	31.1	2310.3	8.51204	157.513	158.069	1605.99	289.522	5.64732	118.582	6.68151	0	0	8.38214	7.09368	4.53986	158.069
8.4-18C-R6	5	17.4	8.426	31.1	2336.26	8.52852	151.698	152.232	1602.87	302.145	5.40715	122.036	7.06642	0	0	8.27616	7.40478	4.74117	152.232
8.4-18C-R6	5.5	17.4	8.426	31.1	2336.26	8.52852	151.698	152.232	1602.87	302.145	5.40715	122.036	7.06642	0	0	8.27616	7.40478	4.74117	152.232
8.4-18C-R6	6	17.4	8.426	31.1	2336.26	8.52852	151.698	152.232	1602.87	302.145	5.40715	122.036	7.06642	0	0	8.27616	7.40478	4.74117	152.232
8.4-18C-R6	6.5	17.4	8.426	31.1	2336.26	8.52852	151.698	152.232	1602.87	302.145	5.40715	122.036	7.06642	0	0	8.27616	7.40478	4.74117	152.232

## Sheet: survival, 3 diets
Reference#	Conditions	Replicate	Beaker	Motor	Experiment	Code	Diet	pH	Temp	Day	Survival (proportion)	Stage		Summary survival data
1	8.0-15C	R5	C1	B2	C	8.0-15C-R5	standard	pH8.0	T.ambient	3	0.556436	D3		Diet	Stage	pH	Temperature	Mean (proportion)	Stdev
2	8.4-15C	R5	C2	B3	C	8.4-15C-R5	standard	pH8.4	T.ambient	3	0.528713	D3		Standard	D3	pH7.6	T.ambient	0.4788	0.0674739
3	7.6-15C	R5	C3	B4	C	7.6-15C-R5	standard	pH7.6	T.ambient	3	0.572277	D3		Standard	D3	pH8.0	T.ambient	0.4744	0.0714622
4	8.0-15C	R6	C4	B5	C	8.0-15C-R6	standard	pH8.0	T.ambient	3	0.537525	D3		Standard	D3	pH8.4	T.ambient	0.469717	0.0549704
5	8.4-15C	R6	C5	B6	C	8.4-15C-R6	standard	pH8.4	T.ambient	3	0.537624	D3		Standard	D3	pH7.6	T.plus3C	0.478383	0.056778
6	7.6-15C	R6	C6	B7	C	7.6-15C-R6	standard	pH7.6	T.ambient	3	0.535644	D3		Standard	D3	pH8.0	T.plus3C	0.473417	0.0623235
7	8.0-18C	R5	C7	B44	C	8.0-18C-R5	standard	pH8.0	T.plus3C	3	0.570297	D3		Standard	D3	pH8.4	T.plus3C	0.46575	0.0464047
8	8.4-18C	R5	C8	B43	C	8.4-18C-R5	standard	pH8.4	T.plus3C	3	0.534653	D3		Standard	D4	pH7.6	T.ambient	0.444647	0.062561
9	7.6-18C	R5	C9	B42	C	7.6-18C-R5	standard	pH7.6	T.plus3C	3	0.565347	D3		Standard	D4	pH8.0	T.ambient	0.445996	0.0472677
10	8.0-18C	R6	C10	B46	C	8.0-18C-R6	standard	pH8.0	T.plus3C	3	0.524752	D3		Standard	D4	pH8.4	T.ambient	0.435362	0.0551048
11	8.4-18C	R6	C11	B47	C	8.4-18C-R6	standard	pH8.4	T.plus3C	3	0.510891	D3		Standard	D4	pH7.6	T.plus3C	0.423709	0.0523967
12	7.6-18C	R6	C12	B45	C	7.6-18C-R6	standard	pH7.6	T.plus3C	3	0.529703	D3		Standard	D4	pH8.0	T.plus3C	0.412934	0.0670674
13	8.0-15C	R1	A1	B2	A	8.0-15C-R1	standard	pH8.0	T.ambient	3	0.420213	D3		Standard	D4	pH8.4	T.plus3C	0.405904	0.0392727
14	8.4-15C	R1	A2	B3	A	8.4-15C-R1	standard	pH8.4	T.ambient	3	0.406617	D3		Standard	D5	pH7.6	T.ambient	0.427818	0.0609599
15	7.6-15C	R1	A3	B4	A	7.6-15C-R1	standard	pH7.6	T.ambient	3	0.384995	D3		Standard	D5	pH8.0	T.ambient	0.420242	0.0330471
16	8.0-15C	R2	A4	B5	A	8.0-15C-R2	standard	pH8.0	T.ambient	3	0.389541	D3		Standard	D5	pH8.4	T.ambient	0.412095	0.0587438
17	8.4-15C	R2	A5	B6	A	8.4-15C-R2	standard	pH8.4	T.ambient	3	0.468517	D3		Standard	D5	pH7.6	T.plus3C	NA	NA
18	7.6-15C	R2	A6	B7	A	7.6-15C-R2	standard	pH7.6	T.ambient	3	0.436499	D3		Standard	D5	pH8.0	T.plus3C	NA	NA
19	8.0-18C	R1	A7	B33	A	8.0-18C-R1	standard	pH8.0	T.plus3C	3	0.425827	D3		Standard	D5	pH8.4	T.plus3C	NA	NA
20	8.4-18C	R1	A8	B34	A	8.4-18C-R1	standard	pH8.4	T.plus3C	3	0.416222	D3
21	7.6-18C	R1	A9	B36	A	7.6-18C-R1	standard	pH7.6	T.plus3C	3	0.427962	D3		Limited	D3	pH7.6	T.ambient	0.637235	0.101513
22	8.0-18C	R2	A10	B37	A	8.0-18C-R2	standard	pH8.0	T.plus3C	3	0.408751	D3		Limited	D3	pH8.0	T.ambient	0.63053	0.0945393
23	8.4-18C	R2	A11	B38	A	8.4-18C-R2	standard	pH8.4	T.plus3C	3	0.447172	D3		Limited	D3	pH8.4	T.ambient	0.617535	0.100711
24	7.6-18C	R2	A12	B39	A	7.6-18C-R2	standard	pH7.6	T.plus3C	3	0.425827	D3		Limited	D3	pH7.6	T.plus3C	0.524503	0.0933751
25	8.0-15C	R3	B1	B2	B	8.0-15C-R3	standard	pH8.0	T.ambient	3	0.457086	D3		Limited	D3	pH8.0	T.plus3C	0.537033	0.0951103
26	8.4-15C	R3	B2	B3	B	8.4-15C-R3	standard	pH8.4	T.ambient	3	0.41517	D3		Limited	D3	pH8.4	T.plus3C	0.523072	0.0926736
27	7.6-15C	R3	B3	B4	B	7.6-15C-R3	standard	pH7.6	T.ambient	3	0.464405	D3		Limited	D4	pH7.6	T.ambient	0.591376	0.0856788
28	8.0-15C	R4	B4	B5	B	8.0-15C-R4	standard	pH8.0	T.ambient	3	0.495675	D3		Limited	D4	pH8.0	T.ambient	0.574367	0.0862012
29	8.4-15C	R4	B5	B6	B	8.4-15C-R4	standard	pH8.4	T.ambient	3	0.461743	D3		Limited	D4	pH8.4	T.ambient	0.559545	0.0937384
30	7.6-15C	R4	B6	B7	B	7.6-15C-R4	standard	pH7.6	T.ambient	3	0.479042	D3		Limited	D4	pH7.6	T.plus3C	0.420928	0.124202
31	8.0-18C	R3	B7	B44	B	8.0-18C-R3	standard	pH8.0	T.plus3C	3	0.443114	D3		Limited	D4	pH8.0	T.plus3C	0.435354	0.158983
32	8.4-18C	R3	B8	B43	B	8.4-18C-R3	standard	pH8.4	T.plus3C	3	0.450432	D3		Limited	D4	pH8.4	T.plus3C	0.422548	0.138747
33	7.6-18C	R3	B9	B42	B	7.6-18C-R3	standard	pH7.6	T.plus3C	3	0.462409	D3		Limited	D5	pH7.6	T.ambient	0.556349	0.0775802
34	8.0-18C	R4	B10	B47	B	8.0-18C-R4	standard	pH8.0	T.plus3C	3	0.467731	D3		Limited	D5	pH8.0	T.ambient	0.536606	0.0741294
35	8.4-18C	R4	B11	B46	B	8.4-18C-R4	standard	pH8.4	T.plus3C	3	0.43513	D3		Limited	D5	pH8.4	T.ambient	0.512109	0.0622845
36	7.6-18C	R4	B12	B45	B	7.6-18C-R4	standard	pH7.6	T.plus3C	3	0.459082	D3		Limited	D5	pH7.6	T.plus3C	0.374294	0.152127
37	8.0-15C	R5	C1	B2	C	8.0-15C-R5	standard	pH8.0	T.ambient	4	0.493465	D4		Limited	D5	pH8.0	T.plus3C	0.387409	0.180671
38	8.4-15C	R5	C2	B3	C	8.4-15C-R5	standard	pH8.4	T.ambient	4	0.525523	D4		Limited	D5	pH8.4	T.plus3C	0.38173	0.161847
39	7.6-15C	R5	C3	B4	C	7.6-15C-R5	standard	pH7.6	T.ambient	4	0.540484	D4		Limited	D6	pH7.6	T.ambient	0.503003	0.0838585
40	8.0-15C	R6	C4	B5	C	8.0-15C-R6	standard	pH8.0	T.ambient	4	0.492772	D4		Limited	D7	pH8.0	T.ambient	0.486273	0.0891673
41	8.4-15C	R6	C5	B6	C	8.4-15C-R6	standard	pH8.4	T.ambient	4	0.471914	D4		Limited	D8	pH8.4	T.ambient	0.469429	0.0744765
42	7.6-15C	R6	C6	B7	C	7.6-15C-R6	standard	pH7.6	T.ambient	4	0.473152	D4		Limited	D9	pH7.6	T.plus3C	NA	NA
43	8.0-18C	R5	C7	B44	C	8.0-18C-R5	standard	pH8.0	T.plus3C	4	0.525941	D4		Limited	D10	pH8.0	T.plus3C	NA	NA
44	8.4-18C	R5	C8	B43	C	8.4-18C-R5	standard	pH8.4	T.plus3C	4	0.460396	D4		Limited	D11	pH8.4	T.plus3C	NA	NA
45	7.6-18C	R5	C9	B42	C	7.6-18C-R5	standard	pH7.6	T.plus3C	4	0.518234	D4
46	8.0-18C	R6	C10	B46	C	8.0-18C-R6	standard	pH8.0	T.plus3C	4	0.454785	D4		Crushed	D3	pH7.6	T.ambient	0.495553	0.0590412
47	8.4-18C	R6	C11	B47	C	8.4-18C-R6	standard	pH8.4	T.plus3C	4	0.411551	D4		Crushed	D3	pH8.0	T.ambient	0.477182	0.048302
48	7.6-18C	R6	C12	B45	C	7.6-18C-R6	standard	pH7.6	T.plus3C	4	0.450248	D4		Crushed	D3	pH8.4	T.ambient	0.406465	0.0429387
49	8.0-15C	R1	A1	B2	A	8.0-15C-R1	standard	pH8.0	T.ambient	4	0.39132	D4		Crushed	D3	pH7.6	T.plus3C	0.41877	0.0780411
50	8.4-15C	R1	A2	B3	A	8.4-15C-R1	standard	pH8.4	T.ambient	4	0.386286	D4		Crushed	D3	pH8.0	T.plus3C	0.404889	0.0658795
51	7.6-15C	R1	A3	B4	A	7.6-15C-R1	standard	pH7.6	T.ambient	4	0.364995	D4		Crushed	D3	pH8.4	T.plus3C	0.311278	0.0468432
52	8.0-15C	R2	A4	B5	A	8.0-15C-R2	standard	pH8.0	T.ambient	4	0.389541	D4		Crushed	D4	pH7.6	T.ambient	0.441586	0.0748568
53	8.4-15C	R2	A5	B6	A	8.4-15C-R2	standard	pH8.4	T.ambient	4	0.429473	D4		Crushed	D4	pH8.0	T.ambient	0.434504	0.0648237
54	7.6-15C	R2	A6	B7	A	7.6-15C-R2	standard	pH7.6	T.ambient	4	0.395275	D4		Crushed	D4	pH8.4	T.ambient	0.370832	0.0316863
55	8.0-18C	R1	A7	B33	A	8.0-18C-R1	standard	pH8.0	T.plus3C	4	0.411633	D4		Crushed	D4	pH7.6	T.plus3C	0.341417	0.0843704
56	8.4-18C	R1	A8	B34	A	8.4-18C-R1	standard	pH8.4	T.plus3C	4	0.376912	D4		Crushed	D4	pH8.0	T.plus3C	0.337921	0.0923324
57	7.6-18C	R1	A9	B36	A	7.6-18C-R1	standard	pH7.6	T.plus3C	4	0.401808	D4		Crushed	D4	pH8.4	T.plus3C	0.255409	0.072544
58	8.0-18C	R2	A10	B37	A	8.0-18C-R2	standard	pH8.0	T.plus3C	4	0.370147	D4		Crushed	D5	pH7.6	T.ambient	0.404796	0.0774284
59	8.4-18C	R2	A11	B38	A	8.4-18C-R2	standard	pH8.4	T.plus3C	4	0.409908	D4		Crushed	D5	pH8.0	T.ambient	0.409552	0.0706036
60	7.6-18C	R2	A12	B39	A	7.6-18C-R2	standard	pH7.6	T.plus3C	4	0.404536	D4		Crushed	D5	pH8.4	T.ambient	0.31149	0.0554171
61	8.0-15C	R3	B1	B2	B	8.0-15C-R3	standard	pH8.0	T.ambient	4	0.440108	D4		Crushed	D5	pH7.6	T.plus3C	NA	NA
62	8.4-15C	R3	B2	B3	B	8.4-15C-R3	standard	pH8.4	T.ambient	4	0.38077	D4		Crushed	D5	pH8.0	T.plus3C	NA	NA
63	7.6-15C	R3	B3	B4	B	7.6-15C-R3	standard	pH7.6	T.ambient	4	0.427252	D4		Crushed	D5	pH8.4	T.plus3C	NA	NA
64	8.0-15C	R4	B4	B5	B	8.0-15C-R4	standard	pH8.0	T.ambient	4	0.468767	D4
65	8.4-15C	R4	B5	B6	B	8.4-15C-R4	standard	pH8.4	T.ambient	4	0.418207	D4
66	7.6-15C	R4	B6	B7	B	7.6-15C-R4	standard	pH7.6	T.ambient	4	0.466724	D4
67	8.0-18C	R3	B7	B44	B	8.0-18C-R3	standard	pH8.0	T.plus3C	4	0.358289	D4
68	8.4-18C	R3	B8	B43	B	8.4-18C-R3	standard	pH8.4	T.plus3C	4	0.428554	D4
69	7.6-18C	R3	B9	B42	B	7.6-18C-R3	standard	pH7.6	T.plus3C	4	0.379175	D4
70	8.0-18C	R4	B10	B47	B	8.0-18C-R4	standard	pH8.0	T.plus3C	4	0.356812	D4
71	8.4-18C	R4	B11	B46	B	8.4-18C-R4	standard	pH8.4	T.plus3C	4	0.348104	D4
72	7.6-18C	R4	B12	B45	B	7.6-18C-R4	standard	pH7.6	T.plus3C	4	0.388252	D4
73	8.0-15C	R5	C1	B2	C	8.0-15C-R5	standard	pH8.0	T.ambient	5	0.465267	D5
74	8.4-15C	R5	C2	B3	C	8.4-15C-R5	standard	pH8.4	T.ambient	5	0.510508	D5
75	7.6-15C	R5	C3	B4	C	7.6-15C-R5	standard	pH7.6	T.ambient	5	0.525042	D5
76	8.0-15C	R6	C4	B5	C	8.0-15C-R6	standard	pH8.0	T.ambient	5	0.450535	D5
77	8.4-15C	R6	C5	B6	C	8.4-15C-R6	standard	pH8.4	T.ambient	5	0.444948	D5
78	7.6-15C	R6	C6	B7	C	7.6-15C-R6	standard	pH7.6	T.ambient	5	0.456254	D5
79	8.0-18C	R5	C7	B44	C	8.0-18C-R5	standard	pH8.0	T.plus3C	5	NA	D5
80	8.4-18C	R5	C8	B43	C	8.4-18C-R5	standard	pH8.4	T.plus3C	5	NA	D5
81	7.6-18C	R5	C9	B42	C	7.6-18C-R5	standard	pH7.6	T.plus3C	5	NA	D5
82	8.0-18C	R6	C10	B46	C	8.0-18C-R6	standard	pH8.0	T.plus3C	5	NA	D5
83	8.4-18C	R6	C11	B47	C	8.4-18C-R6	standard	pH8.4	T.plus3C	5	NA	D5
84	7.6-18C	R6	C12	B45	C	7.6-18C-R6	standard	pH7.6	T.plus3C	5	NA	D5
85	8.0-15C	R1	A1	B2	A	8.0-15C-R1	standard	pH8.0	T.ambient	5	0.39132	D5
86	8.4-15C	R1	A2	B3	A	8.4-15C-R1	standard	pH8.4	T.ambient	5	0.37563	D5
87	7.6-15C	R1	A3	B4	A	7.6-15C-R1	standard	pH7.6	T.ambient	5	0.362477	D5
88	8.0-15C	R2	A4	B5	A	8.0-15C-R2	standard	pH8.0	T.ambient	5	0.381482	D5
89	8.4-15C	R2	A5	B6	A	8.4-15C-R2	standard	pH8.4	T.ambient	5	0.414664	D5
90	7.6-15C	R2	A6	B7	A	7.6-15C-R2	standard	pH7.6	T.ambient	5	0.373466	D5
91	8.0-18C	R1	A7	B33	A	8.0-18C-R1	standard	pH8.0	T.plus3C	5	NA	D5
92	8.4-18C	R1	A8	B34	A	8.4-18C-R1	standard	pH8.4	T.plus3C	5	NA	D5
93	7.6-18C	R1	A9	B36	A	7.6-18C-R1	standard	pH7.6	T.plus3C	5	NA	D5
94	8.0-18C	R2	A10	B37	A	8.0-18C-R2	standard	pH8.0	T.plus3C	5	NA	D5
95	8.4-18C	R2	A11	B38	A	8.4-18C-R2	standard	pH8.4	T.plus3C	5	NA	D5
96	7.6-18C	R2	A12	B39	A	7.6-18C-R2	standard	pH7.6	T.plus3C	5	NA	D5
97	8.0-15C	R3	B1	B2	B	8.0-15C-R3	standard	pH8.0	T.ambient	5	0.407834	D5
98	8.4-15C	R3	B2	B3	B	8.4-15C-R3	standard	pH8.4	T.ambient	5	0.349039	D5
99	7.6-15C	R3	B3	B4	B	7.6-15C-R3	standard	pH7.6	T.ambient	5	0.401617	D5
100	8.0-15C	R4	B4	B5	B	8.0-15C-R4	standard	pH8.0	T.ambient	5	0.425016	D5
101	8.4-15C	R4	B5	B6	B	8.4-15C-R4	standard	pH8.4	T.ambient	5	0.377781	D5
102	7.6-15C	R4	B6	B7	B	7.6-15C-R4	standard	pH7.6	T.ambient	5	0.448055	D5
103	8.0-18C	R3	B7	B44	B	8.0-18C-R3	standard	pH8.0	T.plus3C	5	NA	D5
104	8.4-18C	R3	B8	B43	B	8.4-18C-R3	standard	pH8.4	T.plus3C	5	NA	D5
105	7.6-18C	R3	B9	B42	B	7.6-18C-R3	standard	pH7.6	T.plus3C	5	NA	D5
106	8.0-18C	R4	B10	B47	B	8.0-18C-R4	standard	pH8.0	T.plus3C	5	NA	D5
107	8.4-18C	R4	B11	B46	B	8.4-18C-R4	standard	pH8.4	T.plus3C	5	NA	D5
108	7.6-18C	R4	B12	B45	B	7.6-18C-R4	standard	pH7.6	T.plus3C	5	NA	D5
109	8.0-15C	R1	H3	B2	G	8.0-15C-R1	limited	pH8.0	T.ambient	3	0.757402	D3
110	8.4-15C	R1	H5	B3	G	8.4-15C-R1	limited	pH8.4	T.ambient	3	0.763133	D3
111	7.6-15C	R1	H1	B4	G	7.6-15C-R1	limited	pH7.6	T.ambient	3	0.765492	D3
112	8.0-15C	R2	H4	B2	I	8.0-15C-R2	limited	pH8.0	T.ambient	3	0.692455	D3
113	8.4-15C	R2	H6	B3	I	8.4-15C-R2	limited	pH8.4	T.ambient	3	0.659026	D3
114	7.6-15C	R2	H2	B4	I	7.6-15C-R2	limited	pH7.6	T.ambient	3	0.664756	D3
115	8.0-15C	R3	H9	B5	G	8.0-15C-R3	limited	pH8.0	T.ambient	3	0.660936	D3
116	8.4-15C	R3	H11	B7	G	8.4-15C-R3	limited	pH8.4	T.ambient	3	0.664756	D3
117	7.6-15C	R3	H7	B6	G	7.6-15C-R3	limited	pH7.6	T.ambient	3	0.700153	D3
118	8.0-18C	R1	H10	B43	G	8.0-18C-R1	limited	pH8.0	T.plus3C	3	0.558739	D3
119	8.4-18C	R1	H12	B44	G	8.4-18C-R1	limited	pH8.4	T.plus3C	3	0.582617	D3
120	7.6-18C	R1	H8	B42	G	7.6-18C-R1	limited	pH7.6	T.plus3C	3	0.649475	D3
121	8.0-18C	R2	G4	B42	I	8.0-18C-R2	limited	pH8.0	T.plus3C	3	0.617001	D3
122	8.4-18C	R2	G7	B43	I	8.4-18C-R2	limited	pH8.4	T.plus3C	3	0.61127	D3
123	7.6-18C	R2	G1	B44	I	7.6-18C-R2	limited	pH7.6	T.plus3C	3	0.550143	D3
124	8.0-18C	R3	G5	B47	G	8.0-18C-R3	limited	pH8.0	T.plus3C	3	0.662846	D3
125	8.4-18C	R3	G8	B46	G	8.4-18C-R3	limited	pH8.4	T.plus3C	3	0.594078	D3
126	7.6-18C	R3	G2	B45	G	7.6-18C-R3	limited	pH7.6	T.plus3C	3	0.595033	D3
127	8.0-15C	R4	G6	B5	H	8.0-15C-R4	limited	pH8.0	T.ambient	3	0.572222	D3
128	8.4-15C	R4	G9	B6	H	8.4-15C-R4	limited	pH8.4	T.ambient	3	0.54	D3
129	7.6-15C	R4	G3	B7	H	7.6-15C-R4	limited	pH7.6	T.ambient	3	0.563333	D3
130	8.0-15C	R5	G13	B3	H	8.0-15C-R5	limited	pH8.0	T.ambient	3	0.488889	D3
131	8.4-15C	R5	G16	B4	H	8.4-15C-R5	limited	pH8.4	T.ambient	3	0.478889	D3
132	7.6-15C	R5	G10	B2	H	7.6-15C-R5	limited	pH7.6	T.ambient	3	0.494444	D3
133	8.0-18C	R4	G14	B45	H	8.0-18C-R4	limited	pH8.0	T.plus3C	3	0.426667	D3
134	8.4-18C	R4	G17	B46	H	8.4-18C-R4	limited	pH8.4	T.plus3C	3	0.366667	D3
135	7.6-18C	R4	G11	B47	H	7.6-18C-R4	limited	pH7.6	T.plus3C	3	0.433333	D3
136	8.0-18C	R5	G15	B43	H	8.0-18C-R5	limited	pH8.0	T.plus3C	3	0.436667	D3
137	8.4-18C	R5	G18	B44	H	8.4-18C-R5	limited	pH8.4	T.plus3C	3	0.501111	D3
138	7.6-18C	R5	G12	B42	H	7.6-18C-R5	limited	pH7.6	T.plus3C	3	0.406667	D3
139	8.0-15C	R6	H3	B6	I	8.0-15C-R6	limited	pH8.0	T.ambient	3	0.611276	D3
140	8.4-15C	R6	H5	B7	I	8.4-15C-R6	limited	pH8.4	T.ambient	3	0.599407	D3
141	7.6-15C	R6	H1	B5	I	7.6-15C-R6	limited	pH7.6	T.ambient	3	0.615232	D3
142	8.0-18C	R6	H4	B46	I	8.0-18C-R6	limited	pH8.0	T.plus3C	3	0.520277	D3
143	8.4-18C	R6	H6	B47	I	8.4-18C-R6	limited	pH8.4	T.plus3C	3	0.48269	D3
144	7.6-18C	R6	H2	B45	I	7.6-18C-R6	limited	pH7.6	T.plus3C	3	0.512364	D3
145	8.0-15C	R1	H9	B2	G	8.0-15C-R1	limited	pH8.0	T.ambient	4	0.690077	D4
146	8.4-15C	R1	H11	B3	G	8.4-15C-R1	limited	pH8.4	T.ambient	4	0.703778	D4
147	7.6-15C	R1	H7	B4	G	7.6-15C-R1	limited	pH7.6	T.ambient	4	0.654908	D4
148	8.0-15C	R2	H10	B2	I	8.0-15C-R2	limited	pH8.0	T.ambient	4	0.619362	D4
149	8.4-15C	R2	H12	B3	I	8.4-15C-R2	limited	pH8.4	T.ambient	4	0.607768	D4
150	7.6-15C	R2	H8	B4	I	7.6-15C-R2	limited	pH7.6	T.ambient	4	0.638905	D4
151	8.0-15C	R3	G4	B5	G	8.0-15C-R3	limited	pH8.0	T.ambient	4	0.635233	D4
152	8.4-15C	R3	G7	B7	G	8.4-15C-R3	limited	pH8.4	T.ambient	4	0.598281	D4
153	7.6-15C	R3	G1	B6	G	7.6-15C-R3	limited	pH7.6	T.ambient	4	0.692147	D4
154	8.0-18C	R1	G5	B43	G	8.0-18C-R1	limited	pH8.0	T.plus3C	4	0.546323	D4
155	8.4-18C	R1	G8	B44	G	8.4-18C-R1	limited	pH8.4	T.plus3C	4	0.537302	D4
156	7.6-18C	R1	G2	B42	G	7.6-18C-R1	limited	pH7.6	T.plus3C	4	0.580919	D4
157	8.0-18C	R2	G6	B42	I	8.0-18C-R2	limited	pH8.0	T.plus3C	4	0.617001	D4
158	8.4-18C	R2	G9	B43	I	8.4-18C-R2	limited	pH8.4	T.plus3C	4	0.533164	D4
159	7.6-18C	R2	G3	B44	I	7.6-18C-R2	limited	pH7.6	T.plus3C	4	0.525692	D4
160	8.0-18C	R3	G13	B47	G	8.0-18C-R3	limited	pH8.0	T.plus3C	4	0.556562	D4
161	8.4-18C	R3	G16	B46	G	8.4-18C-R3	limited	pH8.4	T.plus3C	4	0.567675	D4
162	7.6-18C	R3	G10	B45	G	7.6-18C-R3	limited	pH7.6	T.plus3C	4	0.472721	D4
163	8.0-15C	R4	G14	B5	H	8.0-15C-R4	limited	pH8.0	T.ambient	4	0.518179	D4
164	8.4-15C	R4	G17	B6	H	8.4-15C-R4	limited	pH8.4	T.ambient	4	0.483	D4
165	7.6-15C	R4	G11	B7	H	7.6-15C-R4	limited	pH7.6	T.ambient	4	0.553944	D4
166	8.0-15C	R5	G15	B3	H	8.0-15C-R5	limited	pH8.0	T.ambient	4	0.46716	D4
167	8.4-15C	R5	G18	B4	H	8.4-15C-R5	limited	pH8.4	T.ambient	4	0.454944	D4
168	7.6-15C	R5	G12	B2	H	7.6-15C-R5	limited	pH7.6	T.ambient	4	0.461481	D4
169	8.0-18C	R4	H3	B45	H	8.0-18C-R4	limited	pH8.0	T.plus3C	4	0.251667	D4
170	8.4-18C	R4	H5	B46	H	8.4-18C-R4	limited	pH8.4	T.plus3C	4	0.248796	D4
171	7.6-18C	R4	H1	B47	H	7.6-18C-R4	limited	pH7.6	T.plus3C	4	0.311944	D4
172	8.0-18C	R5	H4	B43	H	8.0-18C-R5	limited	pH8.0	T.plus3C	4	0.264815	D4
173	8.4-18C	R5	H6	B44	H	8.4-18C-R5	limited	pH8.4	T.plus3C	4	0.313148	D4
174	7.6-18C	R5	H2	B42	H	7.6-18C-R5	limited	pH7.6	T.plus3C	4	0.269944	D4
175	8.0-15C	R6	H9	B6	I	8.0-15C-R6	limited	pH8.0	T.ambient	4	0.516189	D4
176	8.4-15C	R6	H11	B7	I	8.4-15C-R6	limited	pH8.4	T.ambient	4	0.509496	D4
177	7.6-15C	R6	H7	B5	I	7.6-15C-R6	limited	pH7.6	T.ambient	4	0.546873	D4
178	8.0-18C	R6	H10	B46	I	8.0-18C-R6	limited	pH8.0	T.plus3C	4	0.375756	D4
179	8.4-18C	R6	H12	B47	I	8.4-18C-R6	limited	pH8.4	T.plus3C	4	0.335202	D4
180	7.6-18C	R6	H8	B45	I	7.6-18C-R6	limited	pH7.6	T.plus3C	4	0.364348	D4
181	8.0-15C	R1	G4	B2	G	8.0-15C-R1	limited	pH8.0	T.ambient	5	0.613931	D5
182	8.4-15C	R1	G7	B3	G	8.4-15C-R1	limited	pH8.4	T.ambient	5	0.611559	D5
183	7.6-15C	R1	G1	B4	G	7.6-15C-R1	limited	pH7.6	T.ambient	5	0.605226	D5
184	8.0-15C	R2	G5	B2	I	8.0-15C-R2	limited	pH8.0	T.ambient	5	0.580919	D5
185	8.4-15C	R2	G8	B3	I	8.4-15C-R2	limited	pH8.4	T.ambient	5	0.532321	D5
186	7.6-15C	R2	G2	B4	I	7.6-15C-R2	limited	pH7.6	T.ambient	5	0.603655	D5
187	8.0-15C	R3	G6	B5	G	8.0-15C-R3	limited	pH8.0	T.ambient	5	0.591424	D5
188	8.4-15C	R3	G9	B7	G	8.4-15C-R3	limited	pH8.4	T.ambient	5	0.540516	D5
189	7.6-15C	R3	G3	B6	G	7.6-15C-R3	limited	pH7.6	T.ambient	5	0.649186	D5
190	8.0-18C	R1	G13	B43	G	8.0-18C-R1	limited	pH8.0	T.plus3C	5	0.528112	D5
191	8.4-18C	R1	G16	B44	G	8.4-18C-R1	limited	pH8.4	T.plus3C	5	0.479095	D5
192	7.6-18C	R1	G10	B42	G	7.6-18C-R1	limited	pH7.6	T.plus3C	5	0.571237	D5
193	8.0-18C	R2	G14	B42	I	8.0-18C-R2	limited	pH8.0	T.plus3C	5	0.581009	D5
194	8.4-18C	R2	G17	B43	I	8.4-18C-R2	limited	pH8.4	T.plus3C	5	0.533164	D5
195	7.6-18C	R2	G11	B44	I	7.6-18C-R2	limited	pH7.6	T.plus3C	5	0.490646	D5
196	8.0-18C	R3	G15	B47	G	8.0-18C-R3	limited	pH8.0	T.plus3C	5	0.531648	D5
197	8.4-18C	R3	G18	B46	G	8.4-18C-R3	limited	pH8.4	T.plus3C	5	0.562944	D5
198	7.6-18C	R3	G12	B45	G	7.6-18C-R3	limited	pH7.6	T.plus3C	5	0.453024	D5
199	8.0-15C	R4	H3	B5	H	8.0-15C-R4	limited	pH8.0	T.ambient	5	0.510776	D5
200	8.4-15C	R4	H5	B6	H	8.4-15C-R4	limited	pH8.4	T.ambient	5	0.4554	D5
201	7.6-15C	R4	H1	B7	H	7.6-15C-R4	limited	pH7.6	T.ambient	5	0.506463	D5
202	8.0-15C	R5	H4	B3	H	8.0-15C-R5	limited	pH8.0	T.ambient	5	0.413771	D5
203	8.4-15C	R5	H6	B4	H	8.4-15C-R5	limited	pH8.4	T.ambient	5	0.445196	D5
204	7.6-15C	R5	H2	B2	H	7.6-15C-R5	limited	pH7.6	T.ambient	5	0.438407	D5
205	8.0-18C	R4	H9	B45	H	8.0-18C-R4	limited	pH8.0	T.plus3C	5	0.181083	D5
206	8.4-18C	R4	H11	B46	H	8.4-18C-R4	limited	pH8.4	T.plus3C	5	0.193417	D5
207	7.6-18C	R4	H7	B47	H	7.6-18C-R4	limited	pH7.6	T.plus3C	5	0.23149	D5
208	8.0-18C	R5	H10	B43	H	8.0-18C-R5	limited	pH8.0	T.plus3C	5	0.198836	D5
209	8.4-18C	R5	H12	B44	H	8.4-18C-R5	limited	pH8.4	T.plus3C	5	0.237963	D5
210	7.6-18C	R5	H8	B42	H	7.6-18C-R5	limited	pH7.6	T.plus3C	5	0.196106	D5
211	8.0-15C	R6	I1	B6	I	8.0-15C-R6	limited	pH8.0	T.ambient	5	0.508814	D5
212	8.4-15C	R6	I2	B7	I	8.4-15C-R6	limited	pH8.4	T.ambient	5	0.48766	D5
213	7.6-15C	R6	I3	B5	I	7.6-15C-R6	limited	pH7.6	T.ambient	5	0.535155	D5
214	8.0-18C	R6	I4	B46	I	8.0-18C-R6	limited	pH8.0	T.plus3C	5	0.303765	D5
215	8.4-18C	R6	I5	B47	I	8.4-18C-R6	limited	pH8.4	T.plus3C	5	0.283796	D5
216	7.6-18C	R6	I6	B45	I	7.6-18C-R6	limited	pH7.6	T.plus3C	5	0.303261	D5
217	8.0-15C	R1	I1	B2	G	8.0-15C-R1	limited	pH8.0	T.ambient	6	0.574863	D6
218	8.4-15C	R1	I2	B3	G	8.4-15C-R1	limited	pH8.4	T.ambient	6	0.555963	D6
219	7.6-15C	R1	I3	B4	G	7.6-15C-R1	limited	pH7.6	T.ambient	6	0.566711	D6
220	8.0-15C	R2	I4	B2	I	8.0-15C-R2	limited	pH8.0	T.ambient	6	0.559795	D6
221	8.4-15C	R2	I5	B3	I	8.4-15C-R2	limited	pH8.4	T.ambient	6	0.503285	D6
222	7.6-15C	R2	I6	B4	I	7.6-15C-R2	limited	pH7.6	T.ambient	6	0.570728	D6
223	8.0-15C	R3	I1	B5	G	8.0-15C-R3	limited	pH8.0	T.ambient	6	0.543035	D6
224	8.4-15C	R3	I2	B7	G	8.4-15C-R3	limited	pH8.4	T.ambient	6	0.506119	D6
225	7.6-15C	R3	I3	B6	G	7.6-15C-R3	limited	pH7.6	T.ambient	6	0.572464	D6
226	8.0-18C	R1	I4	B43	G	8.0-18C-R1	limited	pH8.0	T.plus3C	6	NA	D6
227	8.4-18C	R1	I5	B44	G	8.4-18C-R1	limited	pH8.4	T.plus3C	6	NA	D6
228	7.6-18C	R1	I6	B42	G	7.6-18C-R1	limited	pH7.6	T.plus3C	6	NA	D6
229	8.0-18C	R2	I1	B42	I	8.0-18C-R2	limited	pH8.0	T.plus3C	6	NA	D6
230	8.4-18C	R2	I2	B43	I	8.4-18C-R2	limited	pH8.4	T.plus3C	6	NA	D6
231	7.6-18C	R2	I3	B44	I	7.6-18C-R2	limited	pH7.6	T.plus3C	6	NA	D6
232	8.0-18C	R3	I4	B47	G	8.0-18C-R3	limited	pH8.0	T.plus3C	6	NA	D6
233	8.4-18C	R3	I5	B46	G	8.4-18C-R3	limited	pH8.4	T.plus3C	6	NA	D6
234	7.6-18C	R3	I6	B45	G	7.6-18C-R3	limited	pH7.6	T.plus3C	6	NA	D6
235	8.0-15C	R4	I1	B5	H	8.0-15C-R4	limited	pH8.0	T.ambient	6	0.421946	D6
236	8.4-15C	R4	I2	B6	H	8.4-15C-R4	limited	pH8.4	T.ambient	6	0.4356	D6
237	7.6-15C	R4	I3	B7	H	7.6-15C-R4	limited	pH7.6	T.ambient	6	0.440403	D6
238	8.0-15C	R5	I4	B3	H	8.0-15C-R5	limited	pH8.0	T.ambient	6	0.349007	D6
239	8.4-15C	R5	I5	B4	H	8.4-15C-R5	limited	pH8.4	T.ambient	6	0.340671	D6
240	7.6-15C	R5	I6	B2	H	7.6-15C-R5	limited	pH7.6	T.ambient	6	0.369787	D6
241	8.0-18C	R4	I1	B45	H	8.0-18C-R4	limited	pH8.0	T.plus3C	6	NA	D6
242	8.4-18C	R4	I2	B46	H	8.4-18C-R4	limited	pH8.4	T.plus3C	6	NA	D6
243	7.6-18C	R4	I3	B47	H	7.6-18C-R4	limited	pH7.6	T.plus3C	6	NA	D6
244	8.0-18C	R5	I4	B43	H	8.0-18C-R5	limited	pH8.0	T.plus3C	6	NA	D6
245	8.4-18C	R5	I5	B44	H	8.4-18C-R5	limited	pH8.4	T.plus3C	6	NA	D6
246	7.6-18C	R5	I6	B42	H	7.6-18C-R5	limited	pH7.6	T.plus3C	6	NA	D6
247	8.0-15C	R6	I1	B6	I	8.0-15C-R6	limited	pH8.0	T.ambient	6	0.468994	D6
248	8.4-15C	R6	I2	B7	I	8.4-15C-R6	limited	pH8.4	T.ambient	6	0.474938	D6
249	7.6-15C	R6	I3	B5	I	7.6-15C-R6	limited	pH7.6	T.ambient	6	0.497926	D6
250	8.0-18C	R6	I4	B46	I	8.0-18C-R6	limited	pH8.0	T.plus3C	6	NA	D6
251	8.4-18C	R6	I5	B47	I	8.4-18C-R6	limited	pH8.4	T.plus3C	6	NA	D6
252	7.6-18C	R6	I6	B45	I	7.6-18C-R6	limited	pH7.6	T.plus3C	6	NA	D6
253	8.0-15C	R3	E1	B3	E	8.0-15C-R3	crushed	pH8.0	T.ambient	3	0.496396	D3
254	8.4-15C	R3	E2	B2	E	8.4-15C-R3	crushed	pH8.4	T.ambient	3	0.389189	D3
255	7.6-15C	R3	E3	B4	E	7.6-15C-R3	crushed	pH7.6	T.ambient	3	0.493694	D3
256	8.0-15C	R4	E4	B6	E	8.0-15C-R4	crushed	pH8.0	T.ambient	3	0.546847	D3
257	8.4-15C	R4	E5	B5	E	8.4-15C-R4	crushed	pH8.4	T.ambient	3	0.410811	D3
258	7.6-15C	R4	E6	B7	E	7.6-15C-R4	crushed	pH7.6	T.ambient	3	0.576577	D3
259	8.0-18C	R3	E7	B43	E	8.0-18C-R3	crushed	pH8.0	T.plus3C	3	0.411712	D3
260	8.4-18C	R3	E8	B42	E	8.4-18C-R3	crushed	pH8.4	T.plus3C	3	0.252252	D3
261	7.6-18C	R3	E9	B44	E	7.6-18C-R3	crushed	pH7.6	T.plus3C	3	0.456757	D3
262	8.0-18C	R4	E10	B46	E	8.0-18C-R4	crushed	pH8.0	T.plus3C	3	0.51982	D3
263	8.4-18C	R4	E11	B45	E	8.4-18C-R4	crushed	pH8.4	T.plus3C	3	0.330631	D3
264	7.6-18C	R4	E12	B47	E	7.6-18C-R4	crushed	pH7.6	T.plus3C	3	0.556757	D3
265	8.0-15C	R5	F1	B2	F	8.0-15C-R5	crushed	pH8.0	T.ambient	3	0.42087	D3
266	8.4-15C	R5	F2	B4	F	8.4-15C-R5	crushed	pH8.4	T.ambient	3	0.373913	D3
267	7.6-15C	R5	F3	B3	F	7.6-15C-R5	crushed	pH7.6	T.ambient	3	0.433043	D3
268	8.0-15C	R6	F4	B5	F	8.0-15C-R6	crushed	pH8.0	T.ambient	3	0.433043	D3
269	8.4-15C	R6	F5	B7	F	8.4-15C-R6	crushed	pH8.4	T.ambient	3	0.356522	D3
270	7.6-15C	R6	F6	B6	F	7.6-15C-R6	crushed	pH7.6	T.ambient	3	0.463478	D3
271	8.0-18C	R5	F7	B42	F	8.0-18C-R5	crushed	pH8.0	T.plus3C	3	0.376522	D3
272	8.4-18C	R5	F8	B44	F	8.4-18C-R5	crushed	pH8.4	T.plus3C	3	0.261739	D3
273	7.6-18C	R5	F9	B43	F	7.6-18C-R5	crushed	pH7.6	T.plus3C	3	0.38087	D3
274	8.0-18C	R6	F10	B45	F	8.0-18C-R6	crushed	pH8.0	T.plus3C	3	0.352174	D3
275	8.4-18C	R6	F11	B47	F	8.4-18C-R6	crushed	pH8.4	T.plus3C	3	0.306087	D3
276	7.6-18C	R6	F12	B46	F	7.6-18C-R6	crushed	pH7.6	T.plus3C	3	0.346087	D3
277	8.0-15C	R1	D1	B2	D	8.0-15C-R1	crushed	pH8.0	T.ambient	3	0.4579	D3
278	8.4-15C	R1	D2	B3	D	8.4-15C-R1	crushed	pH8.4	T.ambient	3	0.434248	D3
279	7.6-15C	R1	D3	B4	D	7.6-15C-R1	crushed	pH7.6	T.ambient	3	0.449385	D3
280	8.0-15C	R2	D4	B5	D	8.0-15C-R2	crushed	pH8.0	T.ambient	3	0.508036	D3
281	8.4-15C	R2	D5	B6	D	8.4-15C-R2	crushed	pH8.4	T.ambient	3	0.474107	D3
282	7.6-15C	R2	D6	B7	D	7.6-15C-R2	crushed	pH7.6	T.ambient	3	0.557143	D3
283	8.0-18C	R1	D7	B42	D	8.0-18C-R1	crushed	pH8.0	T.plus3C	3	0.33964	D3
284	8.4-18C	R1	D8	B43	D	8.4-18C-R1	crushed	pH8.4	T.plus3C	3	0.349101	D3
285	7.6-18C	R1	D9	B44	D	7.6-18C-R1	crushed	pH7.6	T.plus3C	3	0.40965	D3
286	8.0-18C	R2	D10	B45	D	8.0-18C-R2	crushed	pH8.0	T.plus3C	3	0.429464	D3
287	8.4-18C	R2	D11	B46	D	8.4-18C-R2	crushed	pH8.4	T.plus3C	3	0.367857	D3
288	7.6-18C	R2	D12	B47	D	7.6-18C-R2	crushed	pH7.6	T.plus3C	3	0.3625	D3
289	8.0-15C	R3	E1	B3	E	8.0-15C-R3	crushed	pH8.0	T.ambient	4	0.463303	D4
290	8.4-15C	R3	E2	B2	E	8.4-15C-R3	crushed	pH8.4	T.ambient	4	0.371892	D4
291	7.6-15C	R3	E3	B4	E	7.6-15C-R3	crushed	pH7.6	T.ambient	4	0.474494	D4
292	8.0-15C	R4	E4	B6	E	8.0-15C-R4	crushed	pH8.0	T.ambient	4	0.537733	D4
293	8.4-15C	R4	E5	B5	E	8.4-15C-R4	crushed	pH8.4	T.ambient	4	0.397117	D4
294	7.6-15C	R4	E6	B7	E	7.6-15C-R4	crushed	pH7.6	T.ambient	4	0.544545	D4
295	8.0-18C	R3	E7	B43	E	8.0-18C-R3	crushed	pH8.0	T.plus3C	4	0.388839	D4
296	8.4-18C	R3	E8	B42	E	8.4-18C-R3	crushed	pH8.4	T.plus3C	4	0.218619	D4
297	7.6-18C	R3	E9	B44	E	7.6-18C-R3	crushed	pH7.6	T.plus3C	4	0.408544	D4
298	8.0-18C	R4	E10	B46	E	8.0-18C-R4	crushed	pH8.0	T.plus3C	4	0.467838	D4
299	8.4-18C	R4	E11	B45	E	8.4-18C-R4	crushed	pH8.4	T.plus3C	4	0.297568	D4
300	7.6-18C	R4	E12	B47	E	7.6-18C-R4	crushed	pH7.6	T.plus3C	4	0.463964	D4
301	8.0-15C	R5	F1	B2	F	8.0-15C-R5	crushed	pH8.0	T.ambient	4	0.358847	D4
302	8.4-15C	R5	F2	B4	F	8.4-15C-R5	crushed	pH8.4	T.ambient	4	0.33849	D4
303	7.6-15C	R5	F3	B3	F	7.6-15C-R5	crushed	pH7.6	T.ambient	4	0.369227	D4
304	8.0-15C	R6	F4	B5	F	8.0-15C-R6	crushed	pH8.0	T.ambient	4	0.380622	D4
305	8.4-15C	R6	F5	B7	F	8.4-15C-R6	crushed	pH8.4	T.ambient	4	0.330252	D4
306	7.6-15C	R6	F6	B6	F	7.6-15C-R6	crushed	pH7.6	T.ambient	4	0.363465	D4
307	8.0-18C	R5	F7	B42	F	8.0-18C-R5	crushed	pH8.0	T.plus3C	4	0.217546	D4
308	8.4-18C	R5	F8	B44	F	8.4-18C-R5	crushed	pH8.4	T.plus3C	4	0.159952	D4
309	7.6-18C	R5	F9	B43	F	7.6-18C-R5	crushed	pH7.6	T.plus3C	4	0.262377	D4
310	8.0-18C	R6	F10	B45	F	8.0-18C-R6	crushed	pH8.0	T.plus3C	4	0.260217	D4
311	8.4-18C	R6	F11	B47	F	8.4-18C-R6	crushed	pH8.4	T.plus3C	4	0.202357	D4
312	7.6-18C	R6	F12	B46	F	7.6-18C-R6	crushed	pH7.6	T.plus3C	4	0.25572	D4
313	8.0-15C	R1	D1	B2	D	8.0-15C-R1	crushed	pH8.0	T.ambient	4	0.41211	D4
314	8.4-15C	R1	D2	B3	D	8.4-15C-R1	crushed	pH8.4	T.ambient	4	0.376348	D4
315	7.6-15C	R1	D3	B4	D	7.6-15C-R1	crushed	pH7.6	T.ambient	4	0.399453	D4
316	8.0-15C	R2	D4	B5	D	8.0-15C-R2	crushed	pH8.0	T.ambient	4	0.45441	D4
317	8.4-15C	R2	D5	B6	D	8.4-15C-R2	crushed	pH8.4	T.ambient	4	0.410893	D4
318	7.6-15C	R2	D6	B7	D	7.6-15C-R2	crushed	pH7.6	T.ambient	4	0.498333	D4
319	8.0-18C	R1	D7	B42	D	8.0-18C-R1	crushed	pH8.0	T.plus3C	4	0.311337	D4
320	8.4-18C	R1	D8	B43	D	8.4-18C-R1	crushed	pH8.4	T.plus3C	4	0.304494	D4
321	7.6-18C	R1	D9	B44	D	7.6-18C-R1	crushed	pH7.6	T.plus3C	4	0.361857	D4
322	8.0-18C	R2	D10	B45	D	8.0-18C-R2	crushed	pH8.0	T.plus3C	4	0.381746	D4
323	8.4-18C	R2	D11	B46	D	8.4-18C-R2	crushed	pH8.4	T.plus3C	4	0.349464	D4
324	7.6-18C	R2	D12	B47	D	7.6-18C-R2	crushed	pH7.6	T.plus3C	4	0.296042	D4
325	8.0-15C	R3	E1	B3	E	8.0-15C-R3	crushed	pH8.0	T.ambient	5	0.457126	D5
326	8.4-15C	R3	E2	B2	E	8.4-15C-R3	crushed	pH8.4	T.ambient	5	0.347099	D5
327	7.6-15C	R3	E3	B4	E	7.6-15C-R3	crushed	pH7.6	T.ambient	5	0.439698	D5
328	8.0-15C	R4	E4	B6	E	8.0-15C-R4	crushed	pH8.0	T.ambient	5	0.512639	D5
329	8.4-15C	R4	E5	B5	E	8.4-15C-R4	crushed	pH8.4	T.ambient	5	0.386527	D5
330	7.6-15C	R4	E6	B7	E	7.6-15C-R4	crushed	pH7.6	T.ambient	5	0.508242	D5
331	8.0-18C	R3	E7	B43	E	8.0-18C-R3	crushed	pH8.0	T.plus3C	5	NA	D5
332	8.4-18C	R3	E8	B42	E	8.4-18C-R3	crushed	pH8.4	T.plus3C	5	NA	D5
333	7.6-18C	R3	E9	B44	E	7.6-18C-R3	crushed	pH7.6	T.plus3C	5	NA	D5
334	8.0-18C	R4	E10	B46	E	8.0-18C-R4	crushed	pH8.0	T.plus3C	5	NA	D5
335	8.4-18C	R4	E11	B45	E	8.4-18C-R4	crushed	pH8.4	T.plus3C	5	NA	D5
336	7.6-18C	R4	E12	B47	E	7.6-18C-R4	crushed	pH7.6	T.plus3C	5	NA	D5
337	8.0-15C	R5	F1	B2	F	8.0-15C-R5	crushed	pH8.0	T.ambient	5	0.316775	D5
338	8.4-15C	R5	F2	B4	F	8.4-15C-R5	crushed	pH8.4	T.ambient	5	0.260477	D5
339	7.6-15C	R5	F3	B3	F	7.6-15C-R5	crushed	pH7.6	T.ambient	5	0.328484	D5
340	8.0-15C	R6	F4	B5	F	8.0-15C-R6	crushed	pH8.0	T.ambient	5	0.354373	D5
341	8.4-15C	R6	F5	B7	F	8.4-15C-R6	crushed	pH8.4	T.ambient	5	0.236977	D5
342	7.6-15C	R6	F6	B6	F	7.6-15C-R6	crushed	pH7.6	T.ambient	5	0.315838	D5
343	8.0-18C	R5	F7	B42	F	8.0-18C-R5	crushed	pH8.0	T.plus3C	5	NA	D5
344	8.4-18C	R5	F8	B44	F	8.4-18C-R5	crushed	pH8.4	T.plus3C	5	NA	D5
345	7.6-18C	R5	F9	B43	F	7.6-18C-R5	crushed	pH7.6	T.plus3C	5	NA	D5
346	8.0-18C	R6	F10	B45	F	8.0-18C-R6	crushed	pH8.0	T.plus3C	5	NA	D5
347	8.4-18C	R6	F11	B47	F	8.4-18C-R6	crushed	pH8.4	T.plus3C	5	NA	D5
348	7.6-18C	R6	F12	B46	F	7.6-18C-R6	crushed	pH7.6	T.plus3C	5	NA	D5
349	8.0-15C	R1	D1	B2	D	8.0-15C-R1	crushed	pH8.0	T.ambient	5	0.394448	D5
350	8.4-15C	R1	D2	B3	D	8.4-15C-R1	crushed	pH8.4	T.ambient	5	0.309143	D5
351	7.6-15C	R1	D3	B4	D	7.6-15C-R1	crushed	pH7.6	T.ambient	5	0.373774	D5
352	8.0-15C	R2	D4	B5	D	8.0-15C-R2	crushed	pH8.0	T.ambient	5	0.421952	D5
353	8.4-15C	R2	D5	B6	D	8.4-15C-R2	crushed	pH8.4	T.ambient	5	0.328714	D5
354	7.6-15C	R2	D6	B7	D	7.6-15C-R2	crushed	pH7.6	T.ambient	5	0.462738	D5
355	8.0-18C	R1	D7	B42	D	8.0-18C-R1	crushed	pH8.0	T.plus3C	5	NA	D5
356	8.4-18C	R1	D8	B43	D	8.4-18C-R1	crushed	pH8.4	T.plus3C	5	NA	D5
357	7.6-18C	R1	D9	B44	D	7.6-18C-R1	crushed	pH7.6	T.plus3C	5	NA	D5
358	8.0-18C	R2	D10	B45	D	8.0-18C-R2	crushed	pH8.0	T.plus3C	5	NA	D5
359	8.4-18C	R2	D11	B46	D	8.4-18C-R2	crushed	pH8.4	T.plus3C	5	NA	D5
360	7.6-18C	R2	D12	B47	D	7.6-18C-R2	crushed	pH7.6	T.plus3C	5	NA	D5
469	8.0-15C	R3	E1	B3	E	8.0-15C-R3	crushed	pH8.0	T.ambient	0	1	D0
470	8.4-15C	R3	E2	B2	E	8.4-15C-R3	crushed	pH8.4	T.ambient	0	1	D0
471	7.6-15C	R3	E3	B4	E	7.6-15C-R3	crushed	pH7.6	T.ambient	0	1	D0
472	8.0-15C	R4	E4	B6	E	8.0-15C-R4	crushed	pH8.0	T.ambient	0	1	D0
473	8.4-15C	R4	E5	B5	E	8.4-15C-R4	crushed	pH8.4	T.ambient	0	1	D0
474	7.6-15C	R4	E6	B7	E	7.6-15C-R4	crushed	pH7.6	T.ambient	0	1	D0
475	8.0-18C	R3	E7	B43	E	8.0-18C-R3	crushed	pH8.0	T.plus3C	0	1	D0
476	8.4-18C	R3	E8	B42	E	8.4-18C-R3	crushed	pH8.4	T.plus3C	0	1	D0
477	7.6-18C	R3	E9	B44	E	7.6-18C-R3	crushed	pH7.6	T.plus3C	0	1	D0
478	8.0-18C	R4	E10	B46	E	8.0-18C-R4	crushed	pH8.0	T.plus3C	0	1	D0
479	8.4-18C	R4	E11	B45	E	8.4-18C-R4	crushed	pH8.4	T.plus3C	0	1	D0
480	7.6-18C	R4	E12	B47	E	7.6-18C-R4	crushed	pH7.6	T.plus3C	0	1	D0
481	8.0-15C	R5	F1	B2	F	8.0-15C-R5	crushed	pH8.0	T.ambient	0	1	D0
482	8.4-15C	R5	F2	B4	F	8.4-15C-R5	crushed	pH8.4	T.ambient	0	1	D0
483	7.6-15C	R5	F3	B3	F	7.6-15C-R5	crushed	pH7.6	T.ambient	0	1	D0
484	8.0-15C	R6	F4	B5	F	8.0-15C-R6	crushed	pH8.0	T.ambient	0	1	D0
485	8.4-15C	R6	F5	B7	F	8.4-15C-R6	crushed	pH8.4	T.ambient	0	1	D0
486	7.6-15C	R6	F6	B6	F	7.6-15C-R6	crushed	pH7.6	T.ambient	0	1	D0
487	8.0-18C	R5	F7	B42	F	8.0-18C-R5	crushed	pH8.0	T.plus3C	0	1	D0
488	8.4-18C	R5	F8	B44	F	8.4-18C-R5	crushed	pH8.4	T.plus3C	0	1	D0
489	7.6-18C	R5	F9	B43	F	7.6-18C-R5	crushed	pH7.6	T.plus3C	0	1	D0
490	8.0-18C	R6	F10	B45	F	8.0-18C-R6	crushed	pH8.0	T.plus3C	0	1	D0
491	8.4-18C	R6	F11	B47	F	8.4-18C-R6	crushed	pH8.4	T.plus3C	0	1	D0
492	7.6-18C	R6	F12	B46	F	7.6-18C-R6	crushed	pH7.6	T.plus3C	0	1	D0
493	8.0-15C	R1	D1	B2	D	8.0-15C-R1	crushed	pH8.0	T.ambient	0	1	D0
494	8.4-15C	R1	D2	B3	D	8.4-15C-R1	crushed	pH8.4	T.ambient	0	1	D0
495	7.6-15C	R1	D3	B4	D	7.6-15C-R1	crushed	pH7.6	T.ambient	0	1	D0
496	8.0-15C	R2	D4	B5	D	8.0-15C-R2	crushed	pH8.0	T.ambient	0	1	D0
497	8.4-15C	R2	D5	B6	D	8.4-15C-R2	crushed	pH8.4	T.ambient	0	1	D0
498	7.6-15C	R2	D6	B7	D	7.6-15C-R2	crushed	pH7.6	T.ambient	0	1	D0
499	8.0-18C	R1	D7	B42	D	8.0-18C-R1	crushed	pH8.0	T.plus3C	0	1	D0
500	8.4-18C	R1	D8	B43	D	8.4-18C-R1	crushed	pH8.4	T.plus3C	0	1	D0
501	7.6-18C	R1	D9	B44	D	7.6-18C-R1	crushed	pH7.6	T.plus3C	0	1	D0
502	8.0-18C	R2	D10	B45	D	8.0-18C-R2	crushed	pH8.0	T.plus3C	0	1	D0
503	8.4-18C	R2	D11	B46	D	8.4-18C-R2	crushed	pH8.4	T.plus3C	0	1	D0
504	7.6-18C	R2	D12	B47	D	7.6-18C-R2	crushed	pH7.6	T.plus3C	0	1	D0
505	8.0-15C	R3	E1	B3	E	8.0-15C-R3	crushed	pH8.0	T.ambient	1	0.593857	D1
506	8.4-15C	R3	E2	B2	E	8.4-15C-R3	crushed	pH8.4	T.ambient	1	0.535749	D1
507	7.6-15C	R3	E3	B4	E	7.6-15C-R3	crushed	pH7.6	T.ambient	1	0.592506	D1
508	8.0-15C	R4	E4	B6	E	8.0-15C-R4	crushed	pH8.0	T.ambient	1	0.605569	D1
509	8.4-15C	R4	E5	B5	E	8.4-15C-R4	crushed	pH8.4	T.ambient	1	0.54656	D1
510	7.6-15C	R4	E6	B7	E	7.6-15C-R4	crushed	pH7.6	T.ambient	1	0.638452	D1
511	8.0-18C	R3	E7	B43	E	8.0-18C-R3	crushed	pH8.0	T.plus3C	1	0.483947	D1
512	8.4-18C	R3	E8	B42	E	8.4-18C-R3	crushed	pH8.4	T.plus3C	1	0.42674	D1
513	7.6-18C	R3	E9	B44	E	7.6-18C-R3	crushed	pH7.6	T.plus3C	1	0.538001	D1
514	8.0-18C	R4	E10	B46	E	8.0-18C-R4	crushed	pH8.0	T.plus3C	1	0.560524	D1
515	8.4-18C	R4	E11	B45	E	8.4-18C-R4	crushed	pH8.4	T.plus3C	1	0.465929	D1
516	7.6-18C	R4	E12	B47	E	7.6-18C-R4	crushed	pH7.6	T.plus3C	1	0.569983	D1
517	8.0-15C	R5	F1	B2	F	8.0-15C-R5	crushed	pH8.0	T.ambient	1	0.524835	D1
518	8.4-15C	R5	F2	B4	F	8.4-15C-R5	crushed	pH8.4	T.ambient	1	0.5144	D1
519	7.6-15C	R5	F3	B3	F	7.6-15C-R5	crushed	pH7.6	T.ambient	1	0.545705	D1
520	8.0-15C	R6	F4	B5	F	8.0-15C-R6	crushed	pH8.0	T.ambient	1	0.53527	D1
521	8.4-15C	R6	F5	B7	F	8.4-15C-R6	crushed	pH8.4	T.ambient	1	0.488313	D1
522	7.6-15C	R6	F6	B6	F	7.6-15C-R6	crushed	pH7.6	T.ambient	1	0.550487	D1
523	8.0-18C	R5	F7	B42	F	8.0-18C-R5	crushed	pH8.0	T.plus3C	1	0.493966	D1
524	8.4-18C	R5	F8	B44	F	8.4-18C-R5	crushed	pH8.4	T.plus3C	1	0.453966	D1
525	7.6-18C	R5	F9	B43	F	7.6-18C-R5	crushed	pH7.6	T.plus3C	1	0.504835	D1
526	8.0-18C	R6	F10	B45	F	8.0-18C-R6	crushed	pH8.0	T.plus3C	1	0.490487	D1
527	8.4-18C	R6	F11	B47	F	8.4-18C-R6	crushed	pH8.4	T.plus3C	1	0.476139	D1
528	7.6-18C	R6	F12	B46	F	7.6-18C-R6	crushed	pH7.6	T.plus3C	1	0.490053	D1
529	8.0-15C	R1	D1	B2	D	8.0-15C-R1	crushed	pH8.0	T.ambient	1	0.636156	D1
530	8.4-15C	R1	D2	B3	D	8.4-15C-R1	crushed	pH8.4	T.ambient	1	0.592636	D1
531	7.6-15C	R1	D3	B4	D	7.6-15C-R1	crushed	pH7.6	T.ambient	1	0.64609	D1
532	8.0-15C	R2	D4	B5	D	8.0-15C-R2	crushed	pH8.0	T.ambient	1	0.702827	D1
533	8.4-15C	R2	D5	B6	D	8.4-15C-R2	crushed	pH8.4	T.ambient	1	0.657292	D1
534	7.6-15C	R2	D6	B7	D	7.6-15C-R2	crushed	pH7.6	T.ambient	1	0.695238	D1
535	8.0-18C	R1	D7	B42	D	8.0-18C-R1	crushed	pH8.0	T.plus3C	1	0.638521	D1
536	8.4-18C	R1	D8	B43	D	8.4-18C-R1	crushed	pH8.4	T.plus3C	1	0.591217	D1
537	7.6-18C	R1	D9	B44	D	7.6-18C-R1	crushed	pH7.6	T.plus3C	1	0.621492	D1
538	8.0-18C	R2	D10	B45	D	8.0-18C-R2	crushed	pH8.0	T.plus3C	1	0.626935	D1
539	8.4-18C	R2	D11	B46	D	8.4-18C-R2	crushed	pH8.4	T.plus3C	1	0.600595	D1
540	7.6-18C	R2	D12	B47	D	7.6-18C-R2	crushed	pH7.6	T.plus3C	1	0.597917	D1
541	8.0-15C	R3	E1	B3	E	8.0-15C-R3	crushed	pH8.0	T.ambient	2	0.55591	D2
542	8.4-15C	R3	E2	B2	E	8.4-15C-R3	crushed	pH8.4	T.ambient	2	0.459064	D2
543	7.6-15C	R3	E3	B4	E	7.6-15C-R3	crushed	pH7.6	T.ambient	2	0.553658	D2
544	8.0-15C	R4	E4	B6	E	8.0-15C-R4	crushed	pH8.0	T.ambient	2	0.57543	D2
545	8.4-15C	R4	E5	B5	E	8.4-15C-R4	crushed	pH8.4	T.ambient	2	0.477082	D2
546	7.6-15C	R4	E6	B7	E	7.6-15C-R4	crushed	pH7.6	T.ambient	2	0.630235	D2
547	8.0-18C	R3	E7	B43	E	8.0-18C-R3	crushed	pH8.0	T.plus3C	2	0.372727	D2
548	8.4-18C	R3	E8	B42	E	8.4-18C-R3	crushed	pH8.4	T.plus3C	2	0.277382	D2
549	7.6-18C	R3	E9	B44	E	7.6-18C-R3	crushed	pH7.6	T.plus3C	2	0.462817	D2
550	8.0-18C	R4	E10	B46	E	8.0-18C-R4	crushed	pH8.0	T.plus3C	2	0.500355	D2
551	8.4-18C	R4	E11	B45	E	8.4-18C-R4	crushed	pH8.4	T.plus3C	2	0.342697	D2
552	7.6-18C	R4	E12	B47	E	7.6-18C-R4	crushed	pH7.6	T.plus3C	2	0.516121	D2
553	8.0-15C	R5	F1	B2	F	8.0-15C-R5	crushed	pH8.0	T.ambient	2	0.449728	D2
554	8.4-15C	R5	F2	B4	F	8.4-15C-R5	crushed	pH8.4	T.ambient	2	0.432336	D2
555	7.6-15C	R5	F3	B3	F	7.6-15C-R5	crushed	pH7.6	T.ambient	2	0.48451	D2
556	8.0-15C	R6	F4	B5	F	8.0-15C-R6	crushed	pH8.0	T.ambient	2	0.467119	D2
557	8.4-15C	R6	F5	B7	F	8.4-15C-R6	crushed	pH8.4	T.ambient	2	0.388858	D2
558	7.6-15C	R6	F6	B6	F	7.6-15C-R6	crushed	pH7.6	T.ambient	2	0.492481	D2
559	8.0-18C	R5	F7	B42	F	8.0-18C-R5	crushed	pH8.0	T.plus3C	2	0.398278	D2
560	8.4-18C	R5	F8	B44	F	8.4-18C-R5	crushed	pH8.4	T.plus3C	2	0.331612	D2
561	7.6-18C	R5	F9	B43	F	7.6-18C-R5	crushed	pH7.6	T.plus3C	2	0.416394	D2
562	8.0-18C	R6	F10	B45	F	8.0-18C-R6	crushed	pH8.0	T.plus3C	2	0.392481	D2
563	8.4-18C	R6	F11	B47	F	8.4-18C-R6	crushed	pH8.4	T.plus3C	2	0.368568	D2
564	7.6-18C	R6	F12	B46	F	7.6-18C-R6	crushed	pH7.6	T.plus3C	2	0.391757	D2
565	8.0-15C	R1	D1	B2	D	8.0-15C-R1	crushed	pH8.0	T.ambient	2	0.504704	D2
566	8.4-15C	R1	D2	B3	D	8.4-15C-R1	crushed	pH8.4	T.ambient	2	0.432172	D2
567	7.6-15C	R1	D3	B4	D	7.6-15C-R1	crushed	pH7.6	T.ambient	2	0.52126	D2
568	8.0-15C	R2	D4	B5	D	8.0-15C-R2	crushed	pH8.0	T.ambient	2	0.615823	D2
569	8.4-15C	R2	D5	B6	D	8.4-15C-R2	crushed	pH8.4	T.ambient	2	0.539931	D2
570	7.6-15C	R2	D6	B7	D	7.6-15C-R2	crushed	pH7.6	T.ambient	2	0.603175	D2
571	8.0-18C	R1	D7	B42	D	8.0-18C-R1	crushed	pH8.0	T.plus3C	2	0.508646	D2
572	8.4-18C	R1	D8	B43	D	8.4-18C-R1	crushed	pH8.4	T.plus3C	2	0.429807	D2
573	7.6-18C	R1	D9	B44	D	7.6-18C-R1	crushed	pH7.6	T.plus3C	2	0.480264	D2
574	8.0-18C	R2	D10	B45	D	8.0-18C-R2	crushed	pH8.0	T.plus3C	2	0.489335	D2
575	8.4-18C	R2	D11	B46	D	8.4-18C-R2	crushed	pH8.4	T.plus3C	2	0.445437	D2
576	7.6-18C	R2	D12	B47	D	7.6-18C-R2	crushed	pH7.6	T.plus3C	2	0.440972	D2

## Sheet: fecundity, 3 diets
Reference#	Conditions	Replicate	Beaker	Motor	Experiment	Code	Diet	pH	Temp	Fecundity (egg number)			Summary fecundity data
1	8.0-15C	R1	A1	B2	A	8.0-15C-R1	standard	pH8.0	T.ambient	458			Diet	pH	Temperature	Mean fecundity	Stdev
2	8.0-15C	R1	A1	B2	A	8.0-15C-R1	standard	pH8.0	T.ambient	478			Standard	pH7.6	T.ambient	463.465	89.8163
3	8.0-15C	R1	A1	B2	A	8.0-15C-R1	standard	pH8.0	T.ambient	365			Standard	pH8.0	T.ambient	376.194	89.4826
4	8.0-15C	R1	A1	B2	A	8.0-15C-R1	standard	pH8.0	T.ambient	512			Standard	pH8.4	T.ambient	304.613	88.001
5	8.0-15C	R1	A1	B2	A	8.0-15C-R1	standard	pH8.0	T.ambient	423			Standard	pH7.6	T.plus3C	479.042	120.18
6	8.0-15C	R1	A1	B2	A	8.0-15C-R1	standard	pH8.0	T.ambient	225			Standard	pH8.0	T.plus3C	385.241	122.727
7	8.0-15C	R1	A1	B2	A	8.0-15C-R1	standard	pH8.0	T.ambient	477			Standard	pH8.4	T.plus3C	309.351	97.5767
8	8.0-15C	R1	A1	B2	A	8.0-15C-R1	standard	pH8.0	T.ambient	272
9	8.0-15C	R1	A1	B2	A	8.0-15C-R1	standard	pH8.0	T.ambient	328			Limited	pH7.6	T.ambient	246.395	96.0406
10	8.0-15C	R1	A1	B2	A	8.0-15C-R1	standard	pH8.0	T.ambient	575			Limited	pH8.0	T.ambient	190.039	65.8812
11	8.0-15C	R1	A1	B2	A	8.0-15C-R1	standard	pH8.0	T.ambient	475			Limited	pH8.4	T.ambient	149.351	58.2825
12	8.0-15C	R1	A1	B2	A	8.0-15C-R1	standard	pH8.0	T.ambient	390			Limited	pH7.6	T.plus3C	206.009	78.1424
13	8.0-15C	R1	A1	B2	A	8.0-15C-R1	standard	pH8.0	T.ambient	522			Limited	pH8.0	T.plus3C	166.205	68.0732
14	8.0-15C	R1	A1	B2	A	8.0-15C-R1	standard	pH8.0	T.ambient	210			Limited	pH8.4	T.plus3C	120.544	46.7971
15	8.0-15C	R1	A1	B2	A	8.0-15C-R1	standard	pH8.0	T.ambient	398
16	8.0-15C	R1	A1	B2	A	8.0-15C-R1	standard	pH8.0	T.ambient	417			Crushed	pH7.6	T.ambient	274.591	70.4131
17	8.0-15C	R1	A1	B2	A	8.0-15C-R1	standard	pH8.0	T.ambient	399			Crushed	pH8.0	T.ambient	283.131	91.0231
18	8.0-15C	R1	A1	B2	A	8.0-15C-R1	standard	pH8.0	T.ambient	285			Crushed	pH8.4	T.ambient	233.863	82.6091
19	8.0-15C	R1	A1	B2	A	8.0-15C-R1	standard	pH8.0	T.ambient	283			Crushed	pH7.6	T.plus3C	231.117	71.9052
20	8.0-15C	R1	A1	B2	A	8.0-15C-R1	standard	pH8.0	T.ambient	393			Crushed	pH8.0	T.plus3C	225.5	63.5744
21	8.0-15C	R1	A1	B2	A	8.0-15C-R1	standard	pH8.0	T.ambient	357			Crushed	pH8.4	T.plus3C	204.831	73.3615
22	8.0-15C	R1	A1	B2	A	8.0-15C-R1	standard	pH8.0	T.ambient	267
23	8.0-15C	R1	A1	B2	A	8.0-15C-R1	standard	pH8.0	T.ambient	361
24	8.0-15C	R1	A1	B2	A	8.0-15C-R1	standard	pH8.0	T.ambient	299
25	8.0-15C	R1	A1	B2	A	8.0-15C-R1	standard	pH8.0	T.ambient	254
26	8.0-15C	R1	A1	B2	A	8.0-15C-R1	standard	pH8.0	T.ambient	307
27	8.0-15C	R1	A1	B2	A	8.0-15C-R1	standard	pH8.0	T.ambient	317
28	8.0-15C	R1	A1	B2	A	8.0-15C-R1	standard	pH8.0	T.ambient	310
29	8.0-15C	R1	A1	B2	A	8.0-15C-R1	standard	pH8.0	T.ambient	278
30	8.0-15C	R1	A1	B2	A	8.0-15C-R1	standard	pH8.0	T.ambient	369
31	8.0-15C	R1	A1	B2	A	8.0-15C-R1	standard	pH8.0	T.ambient	321
32	8.0-15C	R2	A4	B5	A	8.0-15C-R2	standard	pH8.0	T.ambient	305
33	8.0-15C	R2	A4	B5	A	8.0-15C-R2	standard	pH8.0	T.ambient	308
34	8.0-15C	R2	A4	B5	A	8.0-15C-R2	standard	pH8.0	T.ambient	315
35	8.0-15C	R2	A4	B5	A	8.0-15C-R2	standard	pH8.0	T.ambient	241
36	8.0-15C	R2	A4	B5	A	8.0-15C-R2	standard	pH8.0	T.ambient	339
37	8.0-15C	R2	A4	B5	A	8.0-15C-R2	standard	pH8.0	T.ambient	417
38	8.0-15C	R2	A4	B5	A	8.0-15C-R2	standard	pH8.0	T.ambient	322
39	8.0-15C	R2	A4	B5	A	8.0-15C-R2	standard	pH8.0	T.ambient	375
40	8.0-15C	R2	A4	B5	A	8.0-15C-R2	standard	pH8.0	T.ambient	371
41	8.0-15C	R2	A4	B5	A	8.0-15C-R2	standard	pH8.0	T.ambient	297
42	8.0-15C	R2	A4	B5	A	8.0-15C-R2	standard	pH8.0	T.ambient	185
43	8.0-15C	R2	A4	B5	A	8.0-15C-R2	standard	pH8.0	T.ambient	375
44	8.0-15C	R2	A4	B5	A	8.0-15C-R2	standard	pH8.0	T.ambient	324
45	8.0-15C	R2	A4	B5	A	8.0-15C-R2	standard	pH8.0	T.ambient	272
46	8.0-15C	R2	A4	B5	A	8.0-15C-R2	standard	pH8.0	T.ambient	492
47	8.0-15C	R2	A4	B5	A	8.0-15C-R2	standard	pH8.0	T.ambient	309
48	8.0-15C	R2	A4	B5	A	8.0-15C-R2	standard	pH8.0	T.ambient	386
49	8.0-15C	R2	A4	B5	A	8.0-15C-R2	standard	pH8.0	T.ambient	356
50	8.0-15C	R2	A4	B5	A	8.0-15C-R2	standard	pH8.0	T.ambient	436
51	8.0-15C	R2	A4	B5	A	8.0-15C-R2	standard	pH8.0	T.ambient	366
52	8.0-15C	R2	A4	B5	A	8.0-15C-R2	standard	pH8.0	T.ambient	310
53	8.0-15C	R2	A4	B5	A	8.0-15C-R2	standard	pH8.0	T.ambient	299
54	8.0-15C	R2	A4	B5	A	8.0-15C-R2	standard	pH8.0	T.ambient	322
55	8.0-15C	R2	A4	B5	A	8.0-15C-R2	standard	pH8.0	T.ambient	335
56	8.0-15C	R2	A4	B5	A	8.0-15C-R2	standard	pH8.0	T.ambient	357
57	8.0-15C	R2	A4	B5	A	8.0-15C-R2	standard	pH8.0	T.ambient	301
58	8.0-15C	R2	A4	B5	A	8.0-15C-R2	standard	pH8.0	T.ambient	505
59	8.0-15C	R2	A4	B5	A	8.0-15C-R2	standard	pH8.0	T.ambient	349
60	8.0-15C	R2	A4	B5	A	8.0-15C-R2	standard	pH8.0	T.ambient	468
61	8.0-15C	R2	A4	B5	A	8.0-15C-R2	standard	pH8.0	T.ambient	362
62	8.0-15C	R2	A4	B5	A	8.0-15C-R2	standard	pH8.0	T.ambient	440
63	8.4-15C	R1	A2	B3	A	8.4-15C-R1	standard	pH8.4	T.ambient	318
64	8.4-15C	R1	A2	B3	A	8.4-15C-R1	standard	pH8.4	T.ambient	249
65	8.4-15C	R1	A2	B3	A	8.4-15C-R1	standard	pH8.4	T.ambient	299
66	8.4-15C	R1	A2	B3	A	8.4-15C-R1	standard	pH8.4	T.ambient	280
67	8.4-15C	R1	A2	B3	A	8.4-15C-R1	standard	pH8.4	T.ambient	375
68	8.4-15C	R1	A2	B3	A	8.4-15C-R1	standard	pH8.4	T.ambient	291
69	8.4-15C	R1	A2	B3	A	8.4-15C-R1	standard	pH8.4	T.ambient	281
70	8.4-15C	R1	A2	B3	A	8.4-15C-R1	standard	pH8.4	T.ambient	332
71	8.4-15C	R1	A2	B3	A	8.4-15C-R1	standard	pH8.4	T.ambient	245
72	8.4-15C	R1	A2	B3	A	8.4-15C-R1	standard	pH8.4	T.ambient	415
73	8.4-15C	R1	A2	B3	A	8.4-15C-R1	standard	pH8.4	T.ambient	350
74	8.4-15C	R1	A2	B3	A	8.4-15C-R1	standard	pH8.4	T.ambient	210
75	8.4-15C	R1	A2	B3	A	8.4-15C-R1	standard	pH8.4	T.ambient	303
76	8.4-15C	R1	A2	B3	A	8.4-15C-R1	standard	pH8.4	T.ambient	324
77	8.4-15C	R1	A2	B3	A	8.4-15C-R1	standard	pH8.4	T.ambient	346
78	8.4-15C	R1	A2	B3	A	8.4-15C-R1	standard	pH8.4	T.ambient	248
79	8.4-15C	R1	A2	B3	A	8.4-15C-R1	standard	pH8.4	T.ambient	304
80	8.4-15C	R1	A2	B3	A	8.4-15C-R1	standard	pH8.4	T.ambient	352
81	8.4-15C	R1	A2	B3	A	8.4-15C-R1	standard	pH8.4	T.ambient	318
82	8.4-15C	R1	A2	B3	A	8.4-15C-R1	standard	pH8.4	T.ambient	341
83	8.4-15C	R1	A2	B3	A	8.4-15C-R1	standard	pH8.4	T.ambient	396
84	8.4-15C	R1	A2	B3	A	8.4-15C-R1	standard	pH8.4	T.ambient	504
85	8.4-15C	R1	A2	B3	A	8.4-15C-R1	standard	pH8.4	T.ambient	270
86	8.4-15C	R1	A2	B3	A	8.4-15C-R1	standard	pH8.4	T.ambient	336
87	8.4-15C	R1	A2	B3	A	8.4-15C-R1	standard	pH8.4	T.ambient	382
88	8.4-15C	R1	A2	B3	A	8.4-15C-R1	standard	pH8.4	T.ambient	392
89	8.4-15C	R1	A2	B3	A	8.4-15C-R1	standard	pH8.4	T.ambient	350
90	8.4-15C	R1	A2	B3	A	8.4-15C-R1	standard	pH8.4	T.ambient	405
91	8.4-15C	R1	A2	B3	A	8.4-15C-R1	standard	pH8.4	T.ambient	478
92	8.4-15C	R1	A2	B3	A	8.4-15C-R1	standard	pH8.4	T.ambient	354
93	8.4-15C	R2	A5	B6	A	8.4-15C-R2	standard	pH8.4	T.ambient	243
94	8.4-15C	R2	A5	B6	A	8.4-15C-R2	standard	pH8.4	T.ambient	393
95	8.4-15C	R2	A5	B6	A	8.4-15C-R2	standard	pH8.4	T.ambient	358
96	8.4-15C	R2	A5	B6	A	8.4-15C-R2	standard	pH8.4	T.ambient	184
97	8.4-15C	R2	A5	B6	A	8.4-15C-R2	standard	pH8.4	T.ambient	232
98	8.4-15C	R2	A5	B6	A	8.4-15C-R2	standard	pH8.4	T.ambient	204
99	8.4-15C	R2	A5	B6	A	8.4-15C-R2	standard	pH8.4	T.ambient	235
100	8.4-15C	R2	A5	B6	A	8.4-15C-R2	standard	pH8.4	T.ambient	317
101	8.4-15C	R2	A5	B6	A	8.4-15C-R2	standard	pH8.4	T.ambient	176
102	8.4-15C	R2	A5	B6	A	8.4-15C-R2	standard	pH8.4	T.ambient	282
103	8.4-15C	R2	A5	B6	A	8.4-15C-R2	standard	pH8.4	T.ambient	295
104	8.4-15C	R2	A5	B6	A	8.4-15C-R2	standard	pH8.4	T.ambient	278
105	8.4-15C	R2	A5	B6	A	8.4-15C-R2	standard	pH8.4	T.ambient	303
106	8.4-15C	R2	A5	B6	A	8.4-15C-R2	standard	pH8.4	T.ambient	279
107	8.4-15C	R2	A5	B6	A	8.4-15C-R2	standard	pH8.4	T.ambient	293
108	8.4-15C	R2	A5	B6	A	8.4-15C-R2	standard	pH8.4	T.ambient	301
109	8.4-15C	R2	A5	B6	A	8.4-15C-R2	standard	pH8.4	T.ambient	326
110	8.4-15C	R2	A5	B6	A	8.4-15C-R2	standard	pH8.4	T.ambient	311
111	8.4-15C	R2	A5	B6	A	8.4-15C-R2	standard	pH8.4	T.ambient	304
112	8.4-15C	R2	A5	B6	A	8.4-15C-R2	standard	pH8.4	T.ambient	254
113	8.4-15C	R2	A5	B6	A	8.4-15C-R2	standard	pH8.4	T.ambient	240
114	8.4-15C	R2	A5	B6	A	8.4-15C-R2	standard	pH8.4	T.ambient	211
115	8.4-15C	R2	A5	B6	A	8.4-15C-R2	standard	pH8.4	T.ambient	284
116	8.4-15C	R2	A5	B6	A	8.4-15C-R2	standard	pH8.4	T.ambient	221
117	8.4-15C	R2	A5	B6	A	8.4-15C-R2	standard	pH8.4	T.ambient	236
118	8.4-15C	R2	A5	B6	A	8.4-15C-R2	standard	pH8.4	T.ambient	358
119	8.4-15C	R2	A5	B6	A	8.4-15C-R2	standard	pH8.4	T.ambient	251
120	8.4-15C	R2	A5	B6	A	8.4-15C-R2	standard	pH8.4	T.ambient	389
121	8.4-15C	R2	A5	B6	A	8.4-15C-R2	standard	pH8.4	T.ambient	281
122	8.4-15C	R2	A5	B6	A	8.4-15C-R2	standard	pH8.4	T.ambient	294
123	7.6-15C	R1	A3	B4	A	7.6-15C-R1	standard	pH7.6	T.ambient	412
124	7.6-15C	R1	A3	B4	A	7.6-15C-R1	standard	pH7.6	T.ambient	388
125	7.6-15C	R1	A3	B4	A	7.6-15C-R1	standard	pH7.6	T.ambient	380
126	7.6-15C	R1	A3	B4	A	7.6-15C-R1	standard	pH7.6	T.ambient	494
127	7.6-15C	R1	A3	B4	A	7.6-15C-R1	standard	pH7.6	T.ambient	390
128	7.6-15C	R1	A3	B4	A	7.6-15C-R1	standard	pH7.6	T.ambient	421
129	7.6-15C	R1	A3	B4	A	7.6-15C-R1	standard	pH7.6	T.ambient	305
130	7.6-15C	R1	A3	B4	A	7.6-15C-R1	standard	pH7.6	T.ambient	407
131	7.6-15C	R1	A3	B4	A	7.6-15C-R1	standard	pH7.6	T.ambient	355
132	7.6-15C	R1	A3	B4	A	7.6-15C-R1	standard	pH7.6	T.ambient	444
133	7.6-15C	R1	A3	B4	A	7.6-15C-R1	standard	pH7.6	T.ambient	564
134	7.6-15C	R1	A3	B4	A	7.6-15C-R1	standard	pH7.6	T.ambient	439
135	7.6-15C	R1	A3	B4	A	7.6-15C-R1	standard	pH7.6	T.ambient	533
136	7.6-15C	R1	A3	B4	A	7.6-15C-R1	standard	pH7.6	T.ambient	538
137	7.6-15C	R1	A3	B4	A	7.6-15C-R1	standard	pH7.6	T.ambient	358
138	7.6-15C	R1	A3	B4	A	7.6-15C-R1	standard	pH7.6	T.ambient	383
139	7.6-15C	R1	A3	B4	A	7.6-15C-R1	standard	pH7.6	T.ambient	549
140	7.6-15C	R1	A3	B4	A	7.6-15C-R1	standard	pH7.6	T.ambient	428
141	7.6-15C	R1	A3	B4	A	7.6-15C-R1	standard	pH7.6	T.ambient	464
142	7.6-15C	R1	A3	B4	A	7.6-15C-R1	standard	pH7.6	T.ambient	380
143	7.6-15C	R1	A3	B4	A	7.6-15C-R1	standard	pH7.6	T.ambient	301
144	7.6-15C	R1	A3	B4	A	7.6-15C-R1	standard	pH7.6	T.ambient	473
145	7.6-15C	R1	A3	B4	A	7.6-15C-R1	standard	pH7.6	T.ambient	395
146	7.6-15C	R1	A3	B4	A	7.6-15C-R1	standard	pH7.6	T.ambient	380
147	7.6-15C	R1	A3	B4	A	7.6-15C-R1	standard	pH7.6	T.ambient	501
148	7.6-15C	R1	A3	B4	A	7.6-15C-R1	standard	pH7.6	T.ambient	562
149	7.6-15C	R1	A3	B4	A	7.6-15C-R1	standard	pH7.6	T.ambient	514
150	7.6-15C	R1	A3	B4	A	7.6-15C-R1	standard	pH7.6	T.ambient	454
151	7.6-15C	R1	A3	B4	A	7.6-15C-R1	standard	pH7.6	T.ambient	412
152	7.6-15C	R1	A3	B4	A	7.6-15C-R1	standard	pH7.6	T.ambient	380
153	7.6-15C	R2	A6	B7	A	7.6-15C-R2	standard	pH7.6	T.ambient	494
154	7.6-15C	R2	A6	B7	A	7.6-15C-R2	standard	pH7.6	T.ambient	523
155	7.6-15C	R2	A6	B7	A	7.6-15C-R2	standard	pH7.6	T.ambient	584
156	7.6-15C	R2	A6	B7	A	7.6-15C-R2	standard	pH7.6	T.ambient	484
157	7.6-15C	R2	A6	B7	A	7.6-15C-R2	standard	pH7.6	T.ambient	354
158	7.6-15C	R2	A6	B7	A	7.6-15C-R2	standard	pH7.6	T.ambient	364
159	7.6-15C	R2	A6	B7	A	7.6-15C-R2	standard	pH7.6	T.ambient	237
160	7.6-15C	R2	A6	B7	A	7.6-15C-R2	standard	pH7.6	T.ambient	500
161	7.6-15C	R2	A6	B7	A	7.6-15C-R2	standard	pH7.6	T.ambient	387
162	7.6-15C	R2	A6	B7	A	7.6-15C-R2	standard	pH7.6	T.ambient	398
163	7.6-15C	R2	A6	B7	A	7.6-15C-R2	standard	pH7.6	T.ambient	567
164	7.6-15C	R2	A6	B7	A	7.6-15C-R2	standard	pH7.6	T.ambient	351
165	7.6-15C	R2	A6	B7	A	7.6-15C-R2	standard	pH7.6	T.ambient	616
166	7.6-15C	R2	A6	B7	A	7.6-15C-R2	standard	pH7.6	T.ambient	245
167	7.6-15C	R2	A6	B7	A	7.6-15C-R2	standard	pH7.6	T.ambient	258
168	7.6-15C	R2	A6	B7	A	7.6-15C-R2	standard	pH7.6	T.ambient	432
169	7.6-15C	R2	A6	B7	A	7.6-15C-R2	standard	pH7.6	T.ambient	487
170	7.6-15C	R2	A6	B7	A	7.6-15C-R2	standard	pH7.6	T.ambient	514
171	7.6-15C	R2	A6	B7	A	7.6-15C-R2	standard	pH7.6	T.ambient	631
172	7.6-15C	R2	A6	B7	A	7.6-15C-R2	standard	pH7.6	T.ambient	297
173	7.6-15C	R2	A6	B7	A	7.6-15C-R2	standard	pH7.6	T.ambient	610
174	7.6-15C	R2	A6	B7	A	7.6-15C-R2	standard	pH7.6	T.ambient	506
175	7.6-15C	R2	A6	B7	A	7.6-15C-R2	standard	pH7.6	T.ambient	467
176	7.6-15C	R2	A6	B7	A	7.6-15C-R2	standard	pH7.6	T.ambient	390
177	7.6-15C	R2	A6	B7	A	7.6-15C-R2	standard	pH7.6	T.ambient	634
178	7.6-15C	R2	A6	B7	A	7.6-15C-R2	standard	pH7.6	T.ambient	447
179	7.6-15C	R2	A6	B7	A	7.6-15C-R2	standard	pH7.6	T.ambient	397
180	7.6-15C	R2	A6	B7	A	7.6-15C-R2	standard	pH7.6	T.ambient	357
181	8.0-15C	R3	B1	B2	B	8.0-15C-R3	standard	pH8.0	T.ambient	430
182	8.0-15C	R3	B1	B2	B	8.0-15C-R3	standard	pH8.0	T.ambient	232
183	8.0-15C	R3	B1	B2	B	8.0-15C-R3	standard	pH8.0	T.ambient	477
184	8.0-15C	R3	B1	B2	B	8.0-15C-R3	standard	pH8.0	T.ambient	458
185	8.0-15C	R3	B1	B2	B	8.0-15C-R3	standard	pH8.0	T.ambient	555
186	8.0-15C	R3	B1	B2	B	8.0-15C-R3	standard	pH8.0	T.ambient	459
187	8.0-15C	R3	B1	B2	B	8.0-15C-R3	standard	pH8.0	T.ambient	435
188	8.0-15C	R3	B1	B2	B	8.0-15C-R3	standard	pH8.0	T.ambient	526
189	8.0-15C	R3	B1	B2	B	8.0-15C-R3	standard	pH8.0	T.ambient	248
190	8.0-15C	R3	B1	B2	B	8.0-15C-R3	standard	pH8.0	T.ambient	519
191	8.0-15C	R3	B1	B2	B	8.0-15C-R3	standard	pH8.0	T.ambient	430
192	8.0-15C	R3	B1	B2	B	8.0-15C-R3	standard	pH8.0	T.ambient	379
193	8.0-15C	R3	B1	B2	B	8.0-15C-R3	standard	pH8.0	T.ambient	493
194	8.0-15C	R3	B1	B2	B	8.0-15C-R3	standard	pH8.0	T.ambient	300
195	8.0-15C	R3	B1	B2	B	8.0-15C-R3	standard	pH8.0	T.ambient	255
196	8.0-15C	R3	B1	B2	B	8.0-15C-R3	standard	pH8.0	T.ambient	342
197	8.0-15C	R3	B1	B2	B	8.0-15C-R3	standard	pH8.0	T.ambient	327
198	8.0-15C	R3	B1	B2	B	8.0-15C-R3	standard	pH8.0	T.ambient	372
199	8.0-15C	R3	B1	B2	B	8.0-15C-R3	standard	pH8.0	T.ambient	364
200	8.0-15C	R3	B1	B2	B	8.0-15C-R3	standard	pH8.0	T.ambient	330
201	8.0-15C	R3	B1	B2	B	8.0-15C-R3	standard	pH8.0	T.ambient	443
202	8.0-15C	R4	B4	B5	B	8.0-15C-R4	standard	pH8.0	T.ambient	703
203	8.0-15C	R4	B4	B5	B	8.0-15C-R4	standard	pH8.0	T.ambient	593
204	8.0-15C	R4	B4	B5	B	8.0-15C-R4	standard	pH8.0	T.ambient	375
205	8.0-15C	R4	B4	B5	B	8.0-15C-R4	standard	pH8.0	T.ambient	350
206	8.0-15C	R4	B4	B5	B	8.0-15C-R4	standard	pH8.0	T.ambient	337
207	8.0-15C	R4	B4	B5	B	8.0-15C-R4	standard	pH8.0	T.ambient	486
208	8.0-15C	R4	B4	B5	B	8.0-15C-R4	standard	pH8.0	T.ambient	446
209	8.0-15C	R4	B4	B5	B	8.0-15C-R4	standard	pH8.0	T.ambient	427
210	8.0-15C	R4	B4	B5	B	8.0-15C-R4	standard	pH8.0	T.ambient	341
211	8.0-15C	R4	B4	B5	B	8.0-15C-R4	standard	pH8.0	T.ambient	487
212	8.0-15C	R4	B4	B5	B	8.0-15C-R4	standard	pH8.0	T.ambient	309
213	8.0-15C	R4	B4	B5	B	8.0-15C-R4	standard	pH8.0	T.ambient	423
214	8.0-15C	R4	B4	B5	B	8.0-15C-R4	standard	pH8.0	T.ambient	414
215	8.0-15C	R4	B4	B5	B	8.0-15C-R4	standard	pH8.0	T.ambient	263
216	8.0-15C	R4	B4	B5	B	8.0-15C-R4	standard	pH8.0	T.ambient	226
217	8.0-15C	R4	B4	B5	B	8.0-15C-R4	standard	pH8.0	T.ambient	241
218	8.0-15C	R4	B4	B5	B	8.0-15C-R4	standard	pH8.0	T.ambient	375
219	8.0-15C	R4	B4	B5	B	8.0-15C-R4	standard	pH8.0	T.ambient	383
220	8.0-15C	R4	B4	B5	B	8.0-15C-R4	standard	pH8.0	T.ambient	413
221	8.0-15C	R4	B4	B5	B	8.0-15C-R4	standard	pH8.0	T.ambient	321
222	8.0-15C	R4	B4	B5	B	8.0-15C-R4	standard	pH8.0	T.ambient	325
223	8.4-15C	R3	B2	B3	B	8.4-15C-R3	standard	pH8.4	T.ambient	450
224	8.4-15C	R3	B2	B3	B	8.4-15C-R3	standard	pH8.4	T.ambient	359
225	8.4-15C	R3	B2	B3	B	8.4-15C-R3	standard	pH8.4	T.ambient	309
226	8.4-15C	R3	B2	B3	B	8.4-15C-R3	standard	pH8.4	T.ambient	760
227	8.4-15C	R3	B2	B3	B	8.4-15C-R3	standard	pH8.4	T.ambient	336
228	8.4-15C	R3	B2	B3	B	8.4-15C-R3	standard	pH8.4	T.ambient	453
229	8.4-15C	R3	B2	B3	B	8.4-15C-R3	standard	pH8.4	T.ambient	305
230	8.4-15C	R3	B2	B3	B	8.4-15C-R3	standard	pH8.4	T.ambient	193
231	8.4-15C	R3	B2	B3	B	8.4-15C-R3	standard	pH8.4	T.ambient	157
232	8.4-15C	R3	B2	B3	B	8.4-15C-R3	standard	pH8.4	T.ambient	350
233	8.4-15C	R3	B2	B3	B	8.4-15C-R3	standard	pH8.4	T.ambient	246
234	8.4-15C	R3	B2	B3	B	8.4-15C-R3	standard	pH8.4	T.ambient	323
235	8.4-15C	R3	B2	B3	B	8.4-15C-R3	standard	pH8.4	T.ambient	302
236	8.4-15C	R3	B2	B3	B	8.4-15C-R3	standard	pH8.4	T.ambient	230
237	8.4-15C	R3	B2	B3	B	8.4-15C-R3	standard	pH8.4	T.ambient	328
238	8.4-15C	R3	B2	B3	B	8.4-15C-R3	standard	pH8.4	T.ambient	206
239	8.4-15C	R3	B2	B3	B	8.4-15C-R3	standard	pH8.4	T.ambient	290
240	8.4-15C	R3	B2	B3	B	8.4-15C-R3	standard	pH8.4	T.ambient	284
241	8.4-15C	R3	B2	B3	B	8.4-15C-R3	standard	pH8.4	T.ambient	220
242	8.4-15C	R3	B2	B3	B	8.4-15C-R3	standard	pH8.4	T.ambient	230
243	8.4-15C	R3	B2	B3	B	8.4-15C-R3	standard	pH8.4	T.ambient	246
244	8.4-15C	R4	B5	B6	B	8.4-15C-R4	standard	pH8.4	T.ambient	565
245	8.4-15C	R4	B5	B6	B	8.4-15C-R4	standard	pH8.4	T.ambient	199
246	8.4-15C	R4	B5	B6	B	8.4-15C-R4	standard	pH8.4	T.ambient	302
247	8.4-15C	R4	B5	B6	B	8.4-15C-R4	standard	pH8.4	T.ambient	315
248	8.4-15C	R4	B5	B6	B	8.4-15C-R4	standard	pH8.4	T.ambient	310
249	8.4-15C	R4	B5	B6	B	8.4-15C-R4	standard	pH8.4	T.ambient	449
250	8.4-15C	R4	B5	B6	B	8.4-15C-R4	standard	pH8.4	T.ambient	150
251	8.4-15C	R4	B5	B6	B	8.4-15C-R4	standard	pH8.4	T.ambient	376
252	8.4-15C	R4	B5	B6	B	8.4-15C-R4	standard	pH8.4	T.ambient	263
253	8.4-15C	R4	B5	B6	B	8.4-15C-R4	standard	pH8.4	T.ambient	435
254	8.4-15C	R4	B5	B6	B	8.4-15C-R4	standard	pH8.4	T.ambient	469
255	8.4-15C	R4	B5	B6	B	8.4-15C-R4	standard	pH8.4	T.ambient	512
256	8.4-15C	R4	B5	B6	B	8.4-15C-R4	standard	pH8.4	T.ambient	379
257	8.4-15C	R4	B5	B6	B	8.4-15C-R4	standard	pH8.4	T.ambient	227
258	8.4-15C	R4	B5	B6	B	8.4-15C-R4	standard	pH8.4	T.ambient	219
259	8.4-15C	R4	B5	B6	B	8.4-15C-R4	standard	pH8.4	T.ambient	255
260	8.4-15C	R4	B5	B6	B	8.4-15C-R4	standard	pH8.4	T.ambient	310
261	8.4-15C	R4	B5	B6	B	8.4-15C-R4	standard	pH8.4	T.ambient	235
262	8.4-15C	R4	B5	B6	B	8.4-15C-R4	standard	pH8.4	T.ambient	263
263	8.4-15C	R4	B5	B6	B	8.4-15C-R4	standard	pH8.4	T.ambient	223
264	8.4-15C	R4	B5	B6	B	8.4-15C-R4	standard	pH8.4	T.ambient	285
265	7.6-15C	R3	B3	B4	B	7.6-15C-R3	standard	pH7.6	T.ambient	679
266	7.6-15C	R3	B3	B4	B	7.6-15C-R3	standard	pH7.6	T.ambient	589
267	7.6-15C	R3	B3	B4	B	7.6-15C-R3	standard	pH7.6	T.ambient	615
268	7.6-15C	R3	B3	B4	B	7.6-15C-R3	standard	pH7.6	T.ambient	727
269	7.6-15C	R3	B3	B4	B	7.6-15C-R3	standard	pH7.6	T.ambient	318
270	7.6-15C	R3	B3	B4	B	7.6-15C-R3	standard	pH7.6	T.ambient	329
271	7.6-15C	R3	B3	B4	B	7.6-15C-R3	standard	pH7.6	T.ambient	504
272	7.6-15C	R3	B3	B4	B	7.6-15C-R3	standard	pH7.6	T.ambient	443
273	7.6-15C	R3	B3	B4	B	7.6-15C-R3	standard	pH7.6	T.ambient	394
274	7.6-15C	R3	B3	B4	B	7.6-15C-R3	standard	pH7.6	T.ambient	489
275	7.6-15C	R3	B3	B4	B	7.6-15C-R3	standard	pH7.6	T.ambient	494
276	7.6-15C	R3	B3	B4	B	7.6-15C-R3	standard	pH7.6	T.ambient	451
277	7.6-15C	R3	B3	B4	B	7.6-15C-R3	standard	pH7.6	T.ambient	568
278	7.6-15C	R3	B3	B4	B	7.6-15C-R3	standard	pH7.6	T.ambient	471
279	7.6-15C	R3	B3	B4	B	7.6-15C-R3	standard	pH7.6	T.ambient	491
280	7.6-15C	R3	B3	B4	B	7.6-15C-R3	standard	pH7.6	T.ambient	419
281	7.6-15C	R3	B3	B4	B	7.6-15C-R3	standard	pH7.6	T.ambient	493
282	7.6-15C	R3	B3	B4	B	7.6-15C-R3	standard	pH7.6	T.ambient	419
283	7.6-15C	R3	B3	B4	B	7.6-15C-R3	standard	pH7.6	T.ambient	625
284	7.6-15C	R3	B3	B4	B	7.6-15C-R3	standard	pH7.6	T.ambient	465
285	7.6-15C	R3	B3	B4	B	7.6-15C-R3	standard	pH7.6	T.ambient	485
286	7.6-15C	R3	B3	B4	B	7.6-15C-R3	standard	pH7.6	T.ambient	535
287	7.6-15C	R4	B6	B7	B	7.6-15C-R4	standard	pH7.6	T.ambient	562
288	7.6-15C	R4	B6	B7	B	7.6-15C-R4	standard	pH7.6	T.ambient	354
289	7.6-15C	R4	B6	B7	B	7.6-15C-R4	standard	pH7.6	T.ambient	418
290	7.6-15C	R4	B6	B7	B	7.6-15C-R4	standard	pH7.6	T.ambient	564
291	7.6-15C	R4	B6	B7	B	7.6-15C-R4	standard	pH7.6	T.ambient	526
292	7.6-15C	R4	B6	B7	B	7.6-15C-R4	standard	pH7.6	T.ambient	398
293	7.6-15C	R4	B6	B7	B	7.6-15C-R4	standard	pH7.6	T.ambient	541
294	7.6-15C	R4	B6	B7	B	7.6-15C-R4	standard	pH7.6	T.ambient	598
295	7.6-15C	R4	B6	B7	B	7.6-15C-R4	standard	pH7.6	T.ambient	375
296	7.6-15C	R4	B6	B7	B	7.6-15C-R4	standard	pH7.6	T.ambient	547
297	7.6-15C	R4	B6	B7	B	7.6-15C-R4	standard	pH7.6	T.ambient	496
298	7.6-15C	R4	B6	B7	B	7.6-15C-R4	standard	pH7.6	T.ambient	438
299	7.6-15C	R4	B6	B7	B	7.6-15C-R4	standard	pH7.6	T.ambient	425
300	7.6-15C	R4	B6	B7	B	7.6-15C-R4	standard	pH7.6	T.ambient	443
301	7.6-15C	R4	B6	B7	B	7.6-15C-R4	standard	pH7.6	T.ambient	452
302	7.6-15C	R4	B6	B7	B	7.6-15C-R4	standard	pH7.6	T.ambient	494
303	7.6-15C	R4	B6	B7	B	7.6-15C-R4	standard	pH7.6	T.ambient	492
304	7.6-15C	R4	B6	B7	B	7.6-15C-R4	standard	pH7.6	T.ambient	452
305	7.6-15C	R4	B6	B7	B	7.6-15C-R4	standard	pH7.6	T.ambient	532
306	7.6-15C	R4	B6	B7	B	7.6-15C-R4	standard	pH7.6	T.ambient	452
307	7.6-15C	R4	B6	B7	B	7.6-15C-R4	standard	pH7.6	T.ambient	538
308	7.6-15C	R4	B6	B7	B	7.6-15C-R4	standard	pH7.6	T.ambient	478
309	7.6-15C	R5	C3	B4	C	7.6-15C-R5	standard	pH7.6	T.ambient	249
310	7.6-15C	R5	C3	B4	C	7.6-15C-R5	standard	pH7.6	T.ambient	419
311	7.6-15C	R5	C3	B4	C	7.6-15C-R5	standard	pH7.6	T.ambient	412
312	7.6-15C	R5	C3	B4	C	7.6-15C-R5	standard	pH7.6	T.ambient	493
313	7.6-15C	R5	C3	B4	C	7.6-15C-R5	standard	pH7.6	T.ambient	491
314	7.6-15C	R5	C3	B4	C	7.6-15C-R5	standard	pH7.6	T.ambient	485
315	7.6-15C	R5	C3	B4	C	7.6-15C-R5	standard	pH7.6	T.ambient	537
316	7.6-15C	R5	C3	B4	C	7.6-15C-R5	standard	pH7.6	T.ambient	420
317	7.6-15C	R5	C3	B4	C	7.6-15C-R5	standard	pH7.6	T.ambient	524
318	7.6-15C	R5	C3	B4	C	7.6-15C-R5	standard	pH7.6	T.ambient	408
319	7.6-15C	R5	C3	B4	C	7.6-15C-R5	standard	pH7.6	T.ambient	604
320	7.6-15C	R5	C3	B4	C	7.6-15C-R5	standard	pH7.6	T.ambient	538
321	7.6-15C	R5	C3	B4	C	7.6-15C-R5	standard	pH7.6	T.ambient	581
322	7.6-15C	R5	C3	B4	C	7.6-15C-R5	standard	pH7.6	T.ambient	556
323	7.6-15C	R5	C3	B4	C	7.6-15C-R5	standard	pH7.6	T.ambient	422
324	7.6-15C	R5	C3	B4	C	7.6-15C-R5	standard	pH7.6	T.ambient	514
325	7.6-15C	R5	C3	B4	C	7.6-15C-R5	standard	pH7.6	T.ambient	437
326	7.6-15C	R5	C3	B4	C	7.6-15C-R5	standard	pH7.6	T.ambient	607
327	7.6-15C	R5	C3	B4	C	7.6-15C-R5	standard	pH7.6	T.ambient	525
328	7.6-15C	R5	C3	B4	C	7.6-15C-R5	standard	pH7.6	T.ambient	447
329	7.6-15C	R6	C6	B7	C	7.6-15C-R6	standard	pH7.6	T.ambient	518
330	7.6-15C	R6	C6	B7	C	7.6-15C-R6	standard	pH7.6	T.ambient	369
331	7.6-15C	R6	C6	B7	C	7.6-15C-R6	standard	pH7.6	T.ambient	442
332	7.6-15C	R6	C6	B7	C	7.6-15C-R6	standard	pH7.6	T.ambient	537
333	7.6-15C	R6	C6	B7	C	7.6-15C-R6	standard	pH7.6	T.ambient	431
334	7.6-15C	R6	C6	B7	C	7.6-15C-R6	standard	pH7.6	T.ambient	421
335	7.6-15C	R6	C6	B7	C	7.6-15C-R6	standard	pH7.6	T.ambient	499
336	7.6-15C	R6	C6	B7	C	7.6-15C-R6	standard	pH7.6	T.ambient	517
337	7.6-15C	R6	C6	B7	C	7.6-15C-R6	standard	pH7.6	T.ambient	460
338	7.6-15C	R6	C6	B7	C	7.6-15C-R6	standard	pH7.6	T.ambient	584
339	7.6-15C	R6	C6	B7	C	7.6-15C-R6	standard	pH7.6	T.ambient	340
340	7.6-15C	R6	C6	B7	C	7.6-15C-R6	standard	pH7.6	T.ambient	371
341	7.6-15C	R6	C6	B7	C	7.6-15C-R6	standard	pH7.6	T.ambient	443
342	7.6-15C	R6	C6	B7	C	7.6-15C-R6	standard	pH7.6	T.ambient	437
343	7.6-15C	R6	C6	B7	C	7.6-15C-R6	standard	pH7.6	T.ambient	428
344	7.6-15C	R6	C6	B7	C	7.6-15C-R6	standard	pH7.6	T.ambient	498
345	7.6-15C	R6	C6	B7	C	7.6-15C-R6	standard	pH7.6	T.ambient	500
346	7.6-15C	R6	C6	B7	C	7.6-15C-R6	standard	pH7.6	T.ambient	397
347	7.6-15C	R6	C6	B7	C	7.6-15C-R6	standard	pH7.6	T.ambient	332
348	7.6-15C	R6	C6	B7	C	7.6-15C-R6	standard	pH7.6	T.ambient	506
349	8.0-15C	R5	C1	B2	C	8.0-15C-R5	standard	pH8.0	T.ambient	249
350	8.0-15C	R5	C1	B2	C	8.0-15C-R5	standard	pH8.0	T.ambient	375
351	8.0-15C	R5	C1	B2	C	8.0-15C-R5	standard	pH8.0	T.ambient	418
352	8.0-15C	R5	C1	B2	C	8.0-15C-R5	standard	pH8.0	T.ambient	431
353	8.0-15C	R5	C1	B2	C	8.0-15C-R5	standard	pH8.0	T.ambient	240
354	8.0-15C	R5	C1	B2	C	8.0-15C-R5	standard	pH8.0	T.ambient	407
355	8.0-15C	R5	C1	B2	C	8.0-15C-R5	standard	pH8.0	T.ambient	297
356	8.0-15C	R5	C1	B2	C	8.0-15C-R5	standard	pH8.0	T.ambient	359
357	8.0-15C	R5	C1	B2	C	8.0-15C-R5	standard	pH8.0	T.ambient	375
358	8.0-15C	R5	C1	B2	C	8.0-15C-R5	standard	pH8.0	T.ambient	349
359	8.0-15C	R5	C1	B2	C	8.0-15C-R5	standard	pH8.0	T.ambient	445
360	8.0-15C	R5	C1	B2	C	8.0-15C-R5	standard	pH8.0	T.ambient	414
361	8.0-15C	R5	C1	B2	C	8.0-15C-R5	standard	pH8.0	T.ambient	424
362	8.0-15C	R5	C1	B2	C	8.0-15C-R5	standard	pH8.0	T.ambient	405
363	8.0-15C	R5	C1	B2	C	8.0-15C-R5	standard	pH8.0	T.ambient	356
364	8.0-15C	R5	C1	B2	C	8.0-15C-R5	standard	pH8.0	T.ambient	347
365	8.0-15C	R5	C1	B2	C	8.0-15C-R5	standard	pH8.0	T.ambient	380
366	8.0-15C	R5	C1	B2	C	8.0-15C-R5	standard	pH8.0	T.ambient	708
367	8.0-15C	R5	C1	B2	C	8.0-15C-R5	standard	pH8.0	T.ambient	408
368	8.0-15C	R5	C1	B2	C	8.0-15C-R5	standard	pH8.0	T.ambient	425
369	8.0-15C	R6	C4	B5	C	8.0-15C-R6	standard	pH8.0	T.ambient	434
370	8.0-15C	R6	C4	B5	C	8.0-15C-R6	standard	pH8.0	T.ambient	338
371	8.0-15C	R6	C4	B5	C	8.0-15C-R6	standard	pH8.0	T.ambient	412
372	8.0-15C	R6	C4	B5	C	8.0-15C-R6	standard	pH8.0	T.ambient	443
373	8.0-15C	R6	C4	B5	C	8.0-15C-R6	standard	pH8.0	T.ambient	480
374	8.0-15C	R6	C4	B5	C	8.0-15C-R6	standard	pH8.0	T.ambient	404
375	8.0-15C	R6	C4	B5	C	8.0-15C-R6	standard	pH8.0	T.ambient	349
376	8.0-15C	R6	C4	B5	C	8.0-15C-R6	standard	pH8.0	T.ambient	383
377	8.0-15C	R6	C4	B5	C	8.0-15C-R6	standard	pH8.0	T.ambient	457
378	8.0-15C	R6	C4	B5	C	8.0-15C-R6	standard	pH8.0	T.ambient	426
379	8.0-15C	R6	C4	B5	C	8.0-15C-R6	standard	pH8.0	T.ambient	557
380	8.0-15C	R6	C4	B5	C	8.0-15C-R6	standard	pH8.0	T.ambient	327
381	8.0-15C	R6	C4	B5	C	8.0-15C-R6	standard	pH8.0	T.ambient	309
382	8.0-15C	R6	C4	B5	C	8.0-15C-R6	standard	pH8.0	T.ambient	339
383	8.0-15C	R6	C4	B5	C	8.0-15C-R6	standard	pH8.0	T.ambient	321
384	8.0-15C	R6	C4	B5	C	8.0-15C-R6	standard	pH8.0	T.ambient	296
385	8.0-15C	R6	C4	B5	C	8.0-15C-R6	standard	pH8.0	T.ambient	379
386	8.0-15C	R6	C4	B5	C	8.0-15C-R6	standard	pH8.0	T.ambient	279
387	8.0-15C	R6	C4	B5	C	8.0-15C-R6	standard	pH8.0	T.ambient	311
388	8.0-15C	R6	C4	B5	C	8.0-15C-R6	standard	pH8.0	T.ambient	340
389	8.4-15C	R5	C2	B3	C	8.4-15C-R5	standard	pH8.4	T.ambient	513
390	8.4-15C	R5	C2	B3	C	8.4-15C-R5	standard	pH8.4	T.ambient	236
391	8.4-15C	R5	C2	B3	C	8.4-15C-R5	standard	pH8.4	T.ambient	312
392	8.4-15C	R5	C2	B3	C	8.4-15C-R5	standard	pH8.4	T.ambient	314
393	8.4-15C	R5	C2	B3	C	8.4-15C-R5	standard	pH8.4	T.ambient	337
394	8.4-15C	R5	C2	B3	C	8.4-15C-R5	standard	pH8.4	T.ambient	321
395	8.4-15C	R5	C2	B3	C	8.4-15C-R5	standard	pH8.4	T.ambient	201
396	8.4-15C	R5	C2	B3	C	8.4-15C-R5	standard	pH8.4	T.ambient	253
397	8.4-15C	R5	C2	B3	C	8.4-15C-R5	standard	pH8.4	T.ambient	302
398	8.4-15C	R5	C2	B3	C	8.4-15C-R5	standard	pH8.4	T.ambient	314
399	8.4-15C	R5	C2	B3	C	8.4-15C-R5	standard	pH8.4	T.ambient	299
400	8.4-15C	R5	C2	B3	C	8.4-15C-R5	standard	pH8.4	T.ambient	390
401	8.4-15C	R5	C2	B3	C	8.4-15C-R5	standard	pH8.4	T.ambient	274
402	8.4-15C	R5	C2	B3	C	8.4-15C-R5	standard	pH8.4	T.ambient	270
403	8.4-15C	R5	C2	B3	C	8.4-15C-R5	standard	pH8.4	T.ambient	343
404	8.4-15C	R5	C2	B3	C	8.4-15C-R5	standard	pH8.4	T.ambient	346
405	8.4-15C	R5	C2	B3	C	8.4-15C-R5	standard	pH8.4	T.ambient	212
406	8.4-15C	R5	C2	B3	C	8.4-15C-R5	standard	pH8.4	T.ambient	291
407	8.4-15C	R5	C2	B3	C	8.4-15C-R5	standard	pH8.4	T.ambient	232
408	8.4-15C	R5	C2	B3	C	8.4-15C-R5	standard	pH8.4	T.ambient	192
409	8.4-15C	R6	C5	B6	C	8.4-15C-R6	standard	pH8.4	T.ambient	220
410	8.4-15C	R6	C5	B6	C	8.4-15C-R6	standard	pH8.4	T.ambient	191
411	8.4-15C	R6	C5	B6	C	8.4-15C-R6	standard	pH8.4	T.ambient	163
412	8.4-15C	R6	C5	B6	C	8.4-15C-R6	standard	pH8.4	T.ambient	385
413	8.4-15C	R6	C5	B6	C	8.4-15C-R6	standard	pH8.4	T.ambient	168
414	8.4-15C	R6	C5	B6	C	8.4-15C-R6	standard	pH8.4	T.ambient	234
415	8.4-15C	R6	C5	B6	C	8.4-15C-R6	standard	pH8.4	T.ambient	214
416	8.4-15C	R6	C5	B6	C	8.4-15C-R6	standard	pH8.4	T.ambient	180
417	8.4-15C	R6	C5	B6	C	8.4-15C-R6	standard	pH8.4	T.ambient	235
418	8.4-15C	R6	C5	B6	C	8.4-15C-R6	standard	pH8.4	T.ambient	315
419	8.4-15C	R6	C5	B6	C	8.4-15C-R6	standard	pH8.4	T.ambient	365
420	8.4-15C	R6	C5	B6	C	8.4-15C-R6	standard	pH8.4	T.ambient	484
421	8.4-15C	R6	C5	B6	C	8.4-15C-R6	standard	pH8.4	T.ambient	362
422	8.4-15C	R6	C5	B6	C	8.4-15C-R6	standard	pH8.4	T.ambient	319
423	8.4-15C	R6	C5	B6	C	8.4-15C-R6	standard	pH8.4	T.ambient	310
424	8.4-15C	R6	C5	B6	C	8.4-15C-R6	standard	pH8.4	T.ambient	276
425	8.4-15C	R6	C5	B6	C	8.4-15C-R6	standard	pH8.4	T.ambient	248
426	8.4-15C	R6	C5	B6	C	8.4-15C-R6	standard	pH8.4	T.ambient	308
427	8.4-15C	R6	C5	B6	C	8.4-15C-R6	standard	pH8.4	T.ambient	350
428	8.4-15C	R6	C5	B6	C	8.4-15C-R6	standard	pH8.4	T.ambient	277
429	8.0-18C	R1	A7	B33	A	8.0-18C-R1	standard	pH8.0	T.plus3C	582
430	8.0-18C	R1	A7	B33	A	8.0-18C-R1	standard	pH8.0	T.plus3C	401
431	8.0-18C	R1	A7	B33	A	8.0-18C-R1	standard	pH8.0	T.plus3C	466
432	8.0-18C	R1	A7	B33	A	8.0-18C-R1	standard	pH8.0	T.plus3C	799
433	8.0-18C	R1	A7	B33	A	8.0-18C-R1	standard	pH8.0	T.plus3C	481
434	8.0-18C	R1	A7	B33	A	8.0-18C-R1	standard	pH8.0	T.plus3C	247
435	8.0-18C	R1	A7	B33	A	8.0-18C-R1	standard	pH8.0	T.plus3C	462
436	8.0-18C	R1	A7	B33	A	8.0-18C-R1	standard	pH8.0	T.plus3C	367
437	8.0-18C	R1	A7	B33	A	8.0-18C-R1	standard	pH8.0	T.plus3C	431
438	8.0-18C	R1	A7	B33	A	8.0-18C-R1	standard	pH8.0	T.plus3C	577
439	8.0-18C	R1	A7	B33	A	8.0-18C-R1	standard	pH8.0	T.plus3C	426
440	8.0-18C	R1	A7	B33	A	8.0-18C-R1	standard	pH8.0	T.plus3C	278
441	8.0-18C	R1	A7	B33	A	8.0-18C-R1	standard	pH8.0	T.plus3C	343
442	8.0-18C	R1	A7	B33	A	8.0-18C-R1	standard	pH8.0	T.plus3C	224
443	8.0-18C	R1	A7	B33	A	8.0-18C-R1	standard	pH8.0	T.plus3C	552
444	8.0-18C	R1	A7	B33	A	8.0-18C-R1	standard	pH8.0	T.plus3C	522
445	8.0-18C	R1	A7	B33	A	8.0-18C-R1	standard	pH8.0	T.plus3C	605
446	8.0-18C	R1	A7	B33	A	8.0-18C-R1	standard	pH8.0	T.plus3C	555
447	8.0-18C	R1	A7	B33	A	8.0-18C-R1	standard	pH8.0	T.plus3C	712
448	8.0-18C	R1	A7	B33	A	8.0-18C-R1	standard	pH8.0	T.plus3C	660
449	8.0-18C	R1	A7	B33	A	8.0-18C-R1	standard	pH8.0	T.plus3C	434
450	8.0-18C	R1	A7	B33	A	8.0-18C-R1	standard	pH8.0	T.plus3C	471
451	8.0-18C	R1	A7	B33	A	8.0-18C-R1	standard	pH8.0	T.plus3C	518
452	8.0-18C	R1	A7	B33	A	8.0-18C-R1	standard	pH8.0	T.plus3C	465
453	8.0-18C	R1	A7	B33	A	8.0-18C-R1	standard	pH8.0	T.plus3C	340
454	8.0-18C	R1	A7	B33	A	8.0-18C-R1	standard	pH8.0	T.plus3C	382
455	8.0-18C	R1	A7	B33	A	8.0-18C-R1	standard	pH8.0	T.plus3C	389
456	8.0-18C	R1	A7	B33	A	8.0-18C-R1	standard	pH8.0	T.plus3C	523
457	8.0-18C	R1	A7	B33	A	8.0-18C-R1	standard	pH8.0	T.plus3C	383
458	8.0-18C	R1	A7	B33	A	8.0-18C-R1	standard	pH8.0	T.plus3C	560
459	8.0-18C	R1	A7	B33	A	8.0-18C-R1	standard	pH8.0	T.plus3C	461
460	8.0-18C	R2	A10	B37	A	8.0-18C-R2	standard	pH8.0	T.plus3C	528
461	8.0-18C	R2	A10	B37	A	8.0-18C-R2	standard	pH8.0	T.plus3C	603
462	8.0-18C	R2	A10	B37	A	8.0-18C-R2	standard	pH8.0	T.plus3C	498
463	8.0-18C	R2	A10	B37	A	8.0-18C-R2	standard	pH8.0	T.plus3C	449
464	8.0-18C	R2	A10	B37	A	8.0-18C-R2	standard	pH8.0	T.plus3C	501
465	8.0-18C	R2	A10	B37	A	8.0-18C-R2	standard	pH8.0	T.plus3C	466
466	8.0-18C	R2	A10	B37	A	8.0-18C-R2	standard	pH8.0	T.plus3C	817
467	8.0-18C	R2	A10	B37	A	8.0-18C-R2	standard	pH8.0	T.plus3C	382
468	8.0-18C	R2	A10	B37	A	8.0-18C-R2	standard	pH8.0	T.plus3C	373
469	8.0-18C	R2	A10	B37	A	8.0-18C-R2	standard	pH8.0	T.plus3C	403
470	8.0-18C	R2	A10	B37	A	8.0-18C-R2	standard	pH8.0	T.plus3C	432
471	8.0-18C	R2	A10	B37	A	8.0-18C-R2	standard	pH8.0	T.plus3C	421
472	8.0-18C	R2	A10	B37	A	8.0-18C-R2	standard	pH8.0	T.plus3C	358
473	8.0-18C	R2	A10	B37	A	8.0-18C-R2	standard	pH8.0	T.plus3C	374
474	8.0-18C	R2	A10	B37	A	8.0-18C-R2	standard	pH8.0	T.plus3C	327
475	8.0-18C	R2	A10	B37	A	8.0-18C-R2	standard	pH8.0	T.plus3C	393
476	8.0-18C	R2	A10	B37	A	8.0-18C-R2	standard	pH8.0	T.plus3C	363
477	8.0-18C	R2	A10	B37	A	8.0-18C-R2	standard	pH8.0	T.plus3C	460
478	8.0-18C	R2	A10	B37	A	8.0-18C-R2	standard	pH8.0	T.plus3C	455
479	8.0-18C	R2	A10	B37	A	8.0-18C-R2	standard	pH8.0	T.plus3C	400
480	8.0-18C	R2	A10	B37	A	8.0-18C-R2	standard	pH8.0	T.plus3C	667
481	8.0-18C	R2	A10	B37	A	8.0-18C-R2	standard	pH8.0	T.plus3C	490
482	8.0-18C	R2	A10	B37	A	8.0-18C-R2	standard	pH8.0	T.plus3C	269
483	8.0-18C	R2	A10	B37	A	8.0-18C-R2	standard	pH8.0	T.plus3C	487
484	8.0-18C	R2	A10	B37	A	8.0-18C-R2	standard	pH8.0	T.plus3C	502
485	8.0-18C	R2	A10	B37	A	8.0-18C-R2	standard	pH8.0	T.plus3C	636
486	8.0-18C	R2	A10	B37	A	8.0-18C-R2	standard	pH8.0	T.plus3C	409
487	8.0-18C	R2	A10	B37	A	8.0-18C-R2	standard	pH8.0	T.plus3C	431
488	8.0-18C	R2	A10	B37	A	8.0-18C-R2	standard	pH8.0	T.plus3C	563
489	8.4-18C	R1	A8	B34	A	8.4-18C-R1	standard	pH8.4	T.plus3C	289
490	8.4-18C	R1	A8	B34	A	8.4-18C-R1	standard	pH8.4	T.plus3C	378
491	8.4-18C	R1	A8	B34	A	8.4-18C-R1	standard	pH8.4	T.plus3C	415
492	8.4-18C	R1	A8	B34	A	8.4-18C-R1	standard	pH8.4	T.plus3C	450
493	8.4-18C	R1	A8	B34	A	8.4-18C-R1	standard	pH8.4	T.plus3C	326
494	8.4-18C	R1	A8	B34	A	8.4-18C-R1	standard	pH8.4	T.plus3C	229
495	8.4-18C	R1	A8	B34	A	8.4-18C-R1	standard	pH8.4	T.plus3C	364
496	8.4-18C	R1	A8	B34	A	8.4-18C-R1	standard	pH8.4	T.plus3C	324
497	8.4-18C	R1	A8	B34	A	8.4-18C-R1	standard	pH8.4	T.plus3C	465
498	8.4-18C	R1	A8	B34	A	8.4-18C-R1	standard	pH8.4	T.plus3C	440
499	8.4-18C	R1	A8	B34	A	8.4-18C-R1	standard	pH8.4	T.plus3C	394
500	8.4-18C	R1	A8	B34	A	8.4-18C-R1	standard	pH8.4	T.plus3C	439
501	8.4-18C	R1	A8	B34	A	8.4-18C-R1	standard	pH8.4	T.plus3C	398
502	8.4-18C	R1	A8	B34	A	8.4-18C-R1	standard	pH8.4	T.plus3C	474
503	8.4-18C	R1	A8	B34	A	8.4-18C-R1	standard	pH8.4	T.plus3C	311
504	8.4-18C	R1	A8	B34	A	8.4-18C-R1	standard	pH8.4	T.plus3C	372
505	8.4-18C	R1	A8	B34	A	8.4-18C-R1	standard	pH8.4	T.plus3C	397
506	8.4-18C	R1	A8	B34	A	8.4-18C-R1	standard	pH8.4	T.plus3C	324
507	8.4-18C	R1	A8	B34	A	8.4-18C-R1	standard	pH8.4	T.plus3C	469
508	8.4-18C	R1	A8	B34	A	8.4-18C-R1	standard	pH8.4	T.plus3C	501
509	8.4-18C	R1	A8	B34	A	8.4-18C-R1	standard	pH8.4	T.plus3C	399
510	8.4-18C	R1	A8	B34	A	8.4-18C-R1	standard	pH8.4	T.plus3C	497
511	8.4-18C	R1	A8	B34	A	8.4-18C-R1	standard	pH8.4	T.plus3C	239
512	8.4-18C	R1	A8	B34	A	8.4-18C-R1	standard	pH8.4	T.plus3C	543
513	8.4-18C	R1	A8	B34	A	8.4-18C-R1	standard	pH8.4	T.plus3C	322
514	8.4-18C	R1	A8	B34	A	8.4-18C-R1	standard	pH8.4	T.plus3C	459
515	8.4-18C	R1	A8	B34	A	8.4-18C-R1	standard	pH8.4	T.plus3C	361
516	8.4-18C	R1	A8	B34	A	8.4-18C-R1	standard	pH8.4	T.plus3C	301
517	8.4-18C	R1	A8	B34	A	8.4-18C-R1	standard	pH8.4	T.plus3C	295
518	8.4-18C	R1	A8	B34	A	8.4-18C-R1	standard	pH8.4	T.plus3C	441
519	8.4-18C	R1	A8	B34	A	8.4-18C-R1	standard	pH8.4	T.plus3C	402
520	8.4-18C	R2	A11	B38	A	8.4-18C-R2	standard	pH8.4	T.plus3C	370
521	8.4-18C	R2	A11	B38	A	8.4-18C-R2	standard	pH8.4	T.plus3C	384
522	8.4-18C	R2	A11	B38	A	8.4-18C-R2	standard	pH8.4	T.plus3C	423
523	8.4-18C	R2	A11	B38	A	8.4-18C-R2	standard	pH8.4	T.plus3C	416
524	8.4-18C	R2	A11	B38	A	8.4-18C-R2	standard	pH8.4	T.plus3C	219
525	8.4-18C	R2	A11	B38	A	8.4-18C-R2	standard	pH8.4	T.plus3C	453
526	8.4-18C	R2	A11	B38	A	8.4-18C-R2	standard	pH8.4	T.plus3C	447
527	8.4-18C	R2	A11	B38	A	8.4-18C-R2	standard	pH8.4	T.plus3C	366
528	8.4-18C	R2	A11	B38	A	8.4-18C-R2	standard	pH8.4	T.plus3C	453
529	8.4-18C	R2	A11	B38	A	8.4-18C-R2	standard	pH8.4	T.plus3C	420
530	8.4-18C	R2	A11	B38	A	8.4-18C-R2	standard	pH8.4	T.plus3C	273
531	8.4-18C	R2	A11	B38	A	8.4-18C-R2	standard	pH8.4	T.plus3C	379
532	8.4-18C	R2	A11	B38	A	8.4-18C-R2	standard	pH8.4	T.plus3C	310
533	8.4-18C	R2	A11	B38	A	8.4-18C-R2	standard	pH8.4	T.plus3C	422
534	8.4-18C	R2	A11	B38	A	8.4-18C-R2	standard	pH8.4	T.plus3C	233
535	8.4-18C	R2	A11	B38	A	8.4-18C-R2	standard	pH8.4	T.plus3C	449
536	8.4-18C	R2	A11	B38	A	8.4-18C-R2	standard	pH8.4	T.plus3C	198
537	8.4-18C	R2	A11	B38	A	8.4-18C-R2	standard	pH8.4	T.plus3C	363
538	8.4-18C	R2	A11	B38	A	8.4-18C-R2	standard	pH8.4	T.plus3C	453
539	8.4-18C	R2	A11	B38	A	8.4-18C-R2	standard	pH8.4	T.plus3C	573
540	8.4-18C	R2	A11	B38	A	8.4-18C-R2	standard	pH8.4	T.plus3C	436
541	8.4-18C	R2	A11	B38	A	8.4-18C-R2	standard	pH8.4	T.plus3C	490
542	8.4-18C	R2	A11	B38	A	8.4-18C-R2	standard	pH8.4	T.plus3C	485
543	8.4-18C	R2	A11	B38	A	8.4-18C-R2	standard	pH8.4	T.plus3C	261
544	8.4-18C	R2	A11	B38	A	8.4-18C-R2	standard	pH8.4	T.plus3C	305
545	8.4-18C	R2	A11	B38	A	8.4-18C-R2	standard	pH8.4	T.plus3C	435
546	8.4-18C	R2	A11	B38	A	8.4-18C-R2	standard	pH8.4	T.plus3C	422
547	8.4-18C	R2	A11	B38	A	8.4-18C-R2	standard	pH8.4	T.plus3C	461
548	8.4-18C	R2	A11	B38	A	8.4-18C-R2	standard	pH8.4	T.plus3C	311
549	8.4-18C	R2	A11	B38	A	8.4-18C-R2	standard	pH8.4	T.plus3C	367
550	8.4-18C	R2	A11	B38	A	8.4-18C-R2	standard	pH8.4	T.plus3C	405
551	7.6-18C	R1	A9	B36	A	7.6-18C-R1	standard	pH7.6	T.plus3C	428
552	7.6-18C	R1	A9	B36	A	7.6-18C-R1	standard	pH7.6	T.plus3C	558
553	7.6-18C	R1	A9	B36	A	7.6-18C-R1	standard	pH7.6	T.plus3C	663
554	7.6-18C	R1	A9	B36	A	7.6-18C-R1	standard	pH7.6	T.plus3C	607
555	7.6-18C	R1	A9	B36	A	7.6-18C-R1	standard	pH7.6	T.plus3C	467
556	7.6-18C	R1	A9	B36	A	7.6-18C-R1	standard	pH7.6	T.plus3C	490
557	7.6-18C	R1	A9	B36	A	7.6-18C-R1	standard	pH7.6	T.plus3C	458
558	7.6-18C	R1	A9	B36	A	7.6-18C-R1	standard	pH7.6	T.plus3C	430
559	7.6-18C	R1	A9	B36	A	7.6-18C-R1	standard	pH7.6	T.plus3C	683
560	7.6-18C	R1	A9	B36	A	7.6-18C-R1	standard	pH7.6	T.plus3C	599
561	7.6-18C	R1	A9	B36	A	7.6-18C-R1	standard	pH7.6	T.plus3C	369
562	7.6-18C	R1	A9	B36	A	7.6-18C-R1	standard	pH7.6	T.plus3C	562
563	7.6-18C	R1	A9	B36	A	7.6-18C-R1	standard	pH7.6	T.plus3C	494
564	7.6-18C	R1	A9	B36	A	7.6-18C-R1	standard	pH7.6	T.plus3C	463
565	7.6-18C	R1	A9	B36	A	7.6-18C-R1	standard	pH7.6	T.plus3C	649
566	7.6-18C	R1	A9	B36	A	7.6-18C-R1	standard	pH7.6	T.plus3C	660
567	7.6-18C	R1	A9	B36	A	7.6-18C-R1	standard	pH7.6	T.plus3C	536
568	7.6-18C	R1	A9	B36	A	7.6-18C-R1	standard	pH7.6	T.plus3C	506
569	7.6-18C	R1	A9	B36	A	7.6-18C-R1	standard	pH7.6	T.plus3C	494
570	7.6-18C	R1	A9	B36	A	7.6-18C-R1	standard	pH7.6	T.plus3C	690
571	7.6-18C	R1	A9	B36	A	7.6-18C-R1	standard	pH7.6	T.plus3C	403
572	7.6-18C	R1	A9	B36	A	7.6-18C-R1	standard	pH7.6	T.plus3C	372
573	7.6-18C	R1	A9	B36	A	7.6-18C-R1	standard	pH7.6	T.plus3C	505
574	7.6-18C	R1	A9	B36	A	7.6-18C-R1	standard	pH7.6	T.plus3C	228
575	7.6-18C	R1	A9	B36	A	7.6-18C-R1	standard	pH7.6	T.plus3C	282
576	7.6-18C	R1	A9	B36	A	7.6-18C-R1	standard	pH7.6	T.plus3C	594
577	7.6-18C	R1	A9	B36	A	7.6-18C-R1	standard	pH7.6	T.plus3C	493
578	7.6-18C	R1	A9	B36	A	7.6-18C-R1	standard	pH7.6	T.plus3C	779
579	7.6-18C	R1	A9	B36	A	7.6-18C-R1	standard	pH7.6	T.plus3C	503
580	7.6-18C	R1	A9	B36	A	7.6-18C-R1	standard	pH7.6	T.plus3C	691
581	7.6-18C	R1	A9	B36	A	7.6-18C-R1	standard	pH7.6	T.plus3C	584
582	7.6-18C	R2	A12	B39	A	7.6-18C-R2	standard	pH7.6	T.plus3C	685
583	7.6-18C	R2	A12	B39	A	7.6-18C-R2	standard	pH7.6	T.plus3C	609
584	7.6-18C	R2	A12	B39	A	7.6-18C-R2	standard	pH7.6	T.plus3C	648
585	7.6-18C	R2	A12	B39	A	7.6-18C-R2	standard	pH7.6	T.plus3C	517
586	7.6-18C	R2	A12	B39	A	7.6-18C-R2	standard	pH7.6	T.plus3C	536
587	7.6-18C	R2	A12	B39	A	7.6-18C-R2	standard	pH7.6	T.plus3C	419
588	7.6-18C	R2	A12	B39	A	7.6-18C-R2	standard	pH7.6	T.plus3C	664
589	7.6-18C	R2	A12	B39	A	7.6-18C-R2	standard	pH7.6	T.plus3C	320
590	7.6-18C	R2	A12	B39	A	7.6-18C-R2	standard	pH7.6	T.plus3C	643
591	7.6-18C	R2	A12	B39	A	7.6-18C-R2	standard	pH7.6	T.plus3C	648
592	7.6-18C	R2	A12	B39	A	7.6-18C-R2	standard	pH7.6	T.plus3C	507
593	7.6-18C	R2	A12	B39	A	7.6-18C-R2	standard	pH7.6	T.plus3C	631
594	7.6-18C	R2	A12	B39	A	7.6-18C-R2	standard	pH7.6	T.plus3C	548
595	7.6-18C	R2	A12	B39	A	7.6-18C-R2	standard	pH7.6	T.plus3C	497
596	7.6-18C	R2	A12	B39	A	7.6-18C-R2	standard	pH7.6	T.plus3C	504
597	7.6-18C	R2	A12	B39	A	7.6-18C-R2	standard	pH7.6	T.plus3C	668
598	7.6-18C	R2	A12	B39	A	7.6-18C-R2	standard	pH7.6	T.plus3C	475
599	7.6-18C	R2	A12	B39	A	7.6-18C-R2	standard	pH7.6	T.plus3C	654
600	7.6-18C	R2	A12	B39	A	7.6-18C-R2	standard	pH7.6	T.plus3C	610
601	7.6-18C	R2	A12	B39	A	7.6-18C-R2	standard	pH7.6	T.plus3C	508
602	7.6-18C	R2	A12	B39	A	7.6-18C-R2	standard	pH7.6	T.plus3C	370
603	7.6-18C	R2	A12	B39	A	7.6-18C-R2	standard	pH7.6	T.plus3C	583
604	7.6-18C	R2	A12	B39	A	7.6-18C-R2	standard	pH7.6	T.plus3C	490
605	7.6-18C	R2	A12	B39	A	7.6-18C-R2	standard	pH7.6	T.plus3C	604
606	7.6-18C	R2	A12	B39	A	7.6-18C-R2	standard	pH7.6	T.plus3C	519
607	7.6-18C	R2	A12	B39	A	7.6-18C-R2	standard	pH7.6	T.plus3C	661
608	7.6-18C	R2	A12	B39	A	7.6-18C-R2	standard	pH7.6	T.plus3C	582
609	7.6-18C	R2	A12	B39	A	7.6-18C-R2	standard	pH7.6	T.plus3C	511
610	7.6-18C	R2	A12	B39	A	7.6-18C-R2	standard	pH7.6	T.plus3C	555
611	8.0-18C	R3	B7	B44	B	8.0-18C-R3	standard	pH8.0	T.plus3C	373
612	8.0-18C	R3	B7	B44	B	8.0-18C-R3	standard	pH8.0	T.plus3C	380
613	8.0-18C	R3	B7	B44	B	8.0-18C-R3	standard	pH8.0	T.plus3C	307
614	8.0-18C	R3	B7	B44	B	8.0-18C-R3	standard	pH8.0	T.plus3C	299
615	8.0-18C	R3	B7	B44	B	8.0-18C-R3	standard	pH8.0	T.plus3C	398
616	8.0-18C	R3	B7	B44	B	8.0-18C-R3	standard	pH8.0	T.plus3C	334
617	8.0-18C	R3	B7	B44	B	8.0-18C-R3	standard	pH8.0	T.plus3C	235
618	8.0-18C	R3	B7	B44	B	8.0-18C-R3	standard	pH8.0	T.plus3C	328
619	8.0-18C	R3	B7	B44	B	8.0-18C-R3	standard	pH8.0	T.plus3C	304
620	8.0-18C	R3	B7	B44	B	8.0-18C-R3	standard	pH8.0	T.plus3C	285
621	8.0-18C	R3	B7	B44	B	8.0-18C-R3	standard	pH8.0	T.plus3C	420
622	8.0-18C	R3	B7	B44	B	8.0-18C-R3	standard	pH8.0	T.plus3C	384
623	8.0-18C	R3	B7	B44	B	8.0-18C-R3	standard	pH8.0	T.plus3C	327
624	8.0-18C	R3	B7	B44	B	8.0-18C-R3	standard	pH8.0	T.plus3C	404
625	8.0-18C	R3	B7	B44	B	8.0-18C-R3	standard	pH8.0	T.plus3C	219
626	8.0-18C	R3	B7	B44	B	8.0-18C-R3	standard	pH8.0	T.plus3C	312
627	8.0-18C	R3	B7	B44	B	8.0-18C-R3	standard	pH8.0	T.plus3C	284
628	8.0-18C	R3	B7	B44	B	8.0-18C-R3	standard	pH8.0	T.plus3C	324
629	8.0-18C	R3	B7	B44	B	8.0-18C-R3	standard	pH8.0	T.plus3C	430
630	8.0-18C	R3	B7	B44	B	8.0-18C-R3	standard	pH8.0	T.plus3C	238
631	8.0-18C	R3	B7	B44	B	8.0-18C-R3	standard	pH8.0	T.plus3C	286
632	8.0-18C	R4	B10	B47	B	8.0-18C-R4	standard	pH8.0	T.plus3C	335
633	8.0-18C	R4	B10	B47	B	8.0-18C-R4	standard	pH8.0	T.plus3C	267
634	8.0-18C	R4	B10	B47	B	8.0-18C-R4	standard	pH8.0	T.plus3C	402
635	8.0-18C	R4	B10	B47	B	8.0-18C-R4	standard	pH8.0	T.plus3C	240
636	8.0-18C	R4	B10	B47	B	8.0-18C-R4	standard	pH8.0	T.plus3C	320
637	8.0-18C	R4	B10	B47	B	8.0-18C-R4	standard	pH8.0	T.plus3C	329
638	8.0-18C	R4	B10	B47	B	8.0-18C-R4	standard	pH8.0	T.plus3C	357
639	8.0-18C	R4	B10	B47	B	8.0-18C-R4	standard	pH8.0	T.plus3C	240
640	8.0-18C	R4	B10	B47	B	8.0-18C-R4	standard	pH8.0	T.plus3C	279
641	8.0-18C	R4	B10	B47	B	8.0-18C-R4	standard	pH8.0	T.plus3C	362
642	8.0-18C	R4	B10	B47	B	8.0-18C-R4	standard	pH8.0	T.plus3C	379
643	8.0-18C	R4	B10	B47	B	8.0-18C-R4	standard	pH8.0	T.plus3C	259
644	8.0-18C	R4	B10	B47	B	8.0-18C-R4	standard	pH8.0	T.plus3C	215
645	8.0-18C	R4	B10	B47	B	8.0-18C-R4	standard	pH8.0	T.plus3C	325
646	8.0-18C	R4	B10	B47	B	8.0-18C-R4	standard	pH8.0	T.plus3C	219
647	8.0-18C	R4	B10	B47	B	8.0-18C-R4	standard	pH8.0	T.plus3C	325
648	8.0-18C	R4	B10	B47	B	8.0-18C-R4	standard	pH8.0	T.plus3C	299
649	8.0-18C	R4	B10	B47	B	8.0-18C-R4	standard	pH8.0	T.plus3C	386
650	8.0-18C	R4	B10	B47	B	8.0-18C-R4	standard	pH8.0	T.plus3C	306
651	8.0-18C	R4	B10	B47	B	8.0-18C-R4	standard	pH8.0	T.plus3C	268
652	8.0-18C	R4	B10	B47	B	8.0-18C-R4	standard	pH8.0	T.plus3C	212
653	8.0-18C	R4	B10	B47	B	8.0-18C-R4	standard	pH8.0	T.plus3C	318
654	8.0-18C	R4	B10	B47	B	8.0-18C-R4	standard	pH8.0	T.plus3C	324
655	8.0-18C	R4	B10	B47	B	8.0-18C-R4	standard	pH8.0	T.plus3C	290
656	8.4-18C	R3	B8	B43	B	8.4-18C-R3	standard	pH8.4	T.plus3C	366
657	8.4-18C	R3	B8	B43	B	8.4-18C-R3	standard	pH8.4	T.plus3C	200
658	8.4-18C	R3	B8	B43	B	8.4-18C-R3	standard	pH8.4	T.plus3C	224
659	8.4-18C	R3	B8	B43	B	8.4-18C-R3	standard	pH8.4	T.plus3C	178
660	8.4-18C	R3	B8	B43	B	8.4-18C-R3	standard	pH8.4	T.plus3C	169
661	8.4-18C	R3	B8	B43	B	8.4-18C-R3	standard	pH8.4	T.plus3C	207
662	8.4-18C	R3	B8	B43	B	8.4-18C-R3	standard	pH8.4	T.plus3C	283
663	8.4-18C	R3	B8	B43	B	8.4-18C-R3	standard	pH8.4	T.plus3C	248
664	8.4-18C	R3	B8	B43	B	8.4-18C-R3	standard	pH8.4	T.plus3C	198
665	8.4-18C	R3	B8	B43	B	8.4-18C-R3	standard	pH8.4	T.plus3C	221
666	8.4-18C	R3	B8	B43	B	8.4-18C-R3	standard	pH8.4	T.plus3C	249
667	8.4-18C	R3	B8	B43	B	8.4-18C-R3	standard	pH8.4	T.plus3C	310
668	8.4-18C	R3	B8	B43	B	8.4-18C-R3	standard	pH8.4	T.plus3C	248
669	8.4-18C	R3	B8	B43	B	8.4-18C-R3	standard	pH8.4	T.plus3C	238
670	8.4-18C	R3	B8	B43	B	8.4-18C-R3	standard	pH8.4	T.plus3C	316
671	8.4-18C	R3	B8	B43	B	8.4-18C-R3	standard	pH8.4	T.plus3C	270
672	8.4-18C	R3	B8	B43	B	8.4-18C-R3	standard	pH8.4	T.plus3C	224
673	8.4-18C	R3	B8	B43	B	8.4-18C-R3	standard	pH8.4	T.plus3C	232
674	8.4-18C	R3	B8	B43	B	8.4-18C-R3	standard	pH8.4	T.plus3C	284
675	8.4-18C	R3	B8	B43	B	8.4-18C-R3	standard	pH8.4	T.plus3C	268
676	8.4-18C	R3	B8	B43	B	8.4-18C-R3	standard	pH8.4	T.plus3C	228
677	8.4-18C	R3	B8	B43	B	8.4-18C-R3	standard	pH8.4	T.plus3C	252
678	8.4-18C	R3	B8	B43	B	8.4-18C-R3	standard	pH8.4	T.plus3C	338
679	8.4-18C	R4	B11	B46	B	8.4-18C-R4	standard	pH8.4	T.plus3C	254
680	8.4-18C	R4	B11	B46	B	8.4-18C-R4	standard	pH8.4	T.plus3C	195
681	8.4-18C	R4	B11	B46	B	8.4-18C-R4	standard	pH8.4	T.plus3C	224
682	8.4-18C	R4	B11	B46	B	8.4-18C-R4	standard	pH8.4	T.plus3C	413
683	8.4-18C	R4	B11	B46	B	8.4-18C-R4	standard	pH8.4	T.plus3C	187
684	8.4-18C	R4	B11	B46	B	8.4-18C-R4	standard	pH8.4	T.plus3C	275
685	8.4-18C	R4	B11	B46	B	8.4-18C-R4	standard	pH8.4	T.plus3C	281
686	8.4-18C	R4	B11	B46	B	8.4-18C-R4	standard	pH8.4	T.plus3C	240
687	8.4-18C	R4	B11	B46	B	8.4-18C-R4	standard	pH8.4	T.plus3C	246
688	8.4-18C	R4	B11	B46	B	8.4-18C-R4	standard	pH8.4	T.plus3C	520
689	8.4-18C	R4	B11	B46	B	8.4-18C-R4	standard	pH8.4	T.plus3C	219
690	8.4-18C	R4	B11	B46	B	8.4-18C-R4	standard	pH8.4	T.plus3C	203
691	8.4-18C	R4	B11	B46	B	8.4-18C-R4	standard	pH8.4	T.plus3C	298
692	8.4-18C	R4	B11	B46	B	8.4-18C-R4	standard	pH8.4	T.plus3C	230
693	8.4-18C	R4	B11	B46	B	8.4-18C-R4	standard	pH8.4	T.plus3C	292
694	8.4-18C	R4	B11	B46	B	8.4-18C-R4	standard	pH8.4	T.plus3C	260
695	8.4-18C	R4	B11	B46	B	8.4-18C-R4	standard	pH8.4	T.plus3C	385
696	8.4-18C	R4	B11	B46	B	8.4-18C-R4	standard	pH8.4	T.plus3C	371
697	8.4-18C	R4	B11	B46	B	8.4-18C-R4	standard	pH8.4	T.plus3C	251
698	8.4-18C	R4	B11	B46	B	8.4-18C-R4	standard	pH8.4	T.plus3C	281
699	8.4-18C	R4	B11	B46	B	8.4-18C-R4	standard	pH8.4	T.plus3C	201
700	8.4-18C	R4	B11	B46	B	8.4-18C-R4	standard	pH8.4	T.plus3C	245
701	8.4-18C	R4	B11	B46	B	8.4-18C-R4	standard	pH8.4	T.plus3C	279
702	7.6-18C	R3	B9	B42	B	7.6-18C-R3	standard	pH7.6	T.plus3C	402
703	7.6-18C	R3	B9	B42	B	7.6-18C-R3	standard	pH7.6	T.plus3C	270
704	7.6-18C	R3	B9	B42	B	7.6-18C-R3	standard	pH7.6	T.plus3C	323
705	7.6-18C	R3	B9	B42	B	7.6-18C-R3	standard	pH7.6	T.plus3C	311
706	7.6-18C	R3	B9	B42	B	7.6-18C-R3	standard	pH7.6	T.plus3C	471
707	7.6-18C	R3	B9	B42	B	7.6-18C-R3	standard	pH7.6	T.plus3C	497
708	7.6-18C	R3	B9	B42	B	7.6-18C-R3	standard	pH7.6	T.plus3C	444
709	7.6-18C	R3	B9	B42	B	7.6-18C-R3	standard	pH7.6	T.plus3C	322
710	7.6-18C	R3	B9	B42	B	7.6-18C-R3	standard	pH7.6	T.plus3C	414
711	7.6-18C	R3	B9	B42	B	7.6-18C-R3	standard	pH7.6	T.plus3C	330
712	7.6-18C	R3	B9	B42	B	7.6-18C-R3	standard	pH7.6	T.plus3C	434
713	7.6-18C	R3	B9	B42	B	7.6-18C-R3	standard	pH7.6	T.plus3C	319
714	7.6-18C	R3	B9	B42	B	7.6-18C-R3	standard	pH7.6	T.plus3C	377
715	7.6-18C	R3	B9	B42	B	7.6-18C-R3	standard	pH7.6	T.plus3C	506
716	7.6-18C	R3	B9	B42	B	7.6-18C-R3	standard	pH7.6	T.plus3C	568
717	7.6-18C	R3	B9	B42	B	7.6-18C-R3	standard	pH7.6	T.plus3C	501
718	7.6-18C	R3	B9	B42	B	7.6-18C-R3	standard	pH7.6	T.plus3C	447
719	7.6-18C	R3	B9	B42	B	7.6-18C-R3	standard	pH7.6	T.plus3C	556
720	7.6-18C	R3	B9	B42	B	7.6-18C-R3	standard	pH7.6	T.plus3C	632
721	7.6-18C	R3	B9	B42	B	7.6-18C-R3	standard	pH7.6	T.plus3C	422
722	7.6-18C	R3	B9	B42	B	7.6-18C-R3	standard	pH7.6	T.plus3C	434
723	7.6-18C	R4	B12	B45	B	7.6-18C-R4	standard	pH7.6	T.plus3C	449
724	7.6-18C	R4	B12	B45	B	7.6-18C-R4	standard	pH7.6	T.plus3C	351
725	7.6-18C	R4	B12	B45	B	7.6-18C-R4	standard	pH7.6	T.plus3C	434
726	7.6-18C	R4	B12	B45	B	7.6-18C-R4	standard	pH7.6	T.plus3C	685
727	7.6-18C	R4	B12	B45	B	7.6-18C-R4	standard	pH7.6	T.plus3C	430
728	7.6-18C	R4	B12	B45	B	7.6-18C-R4	standard	pH7.6	T.plus3C	460
729	7.6-18C	R4	B12	B45	B	7.6-18C-R4	standard	pH7.6	T.plus3C	313
730	7.6-18C	R4	B12	B45	B	7.6-18C-R4	standard	pH7.6	T.plus3C	430
731	7.6-18C	R4	B12	B45	B	7.6-18C-R4	standard	pH7.6	T.plus3C	283
732	7.6-18C	R4	B12	B45	B	7.6-18C-R4	standard	pH7.6	T.plus3C	394
733	7.6-18C	R4	B12	B45	B	7.6-18C-R4	standard	pH7.6	T.plus3C	722
734	7.6-18C	R4	B12	B45	B	7.6-18C-R4	standard	pH7.6	T.plus3C	492
735	7.6-18C	R4	B12	B45	B	7.6-18C-R4	standard	pH7.6	T.plus3C	425
736	7.6-18C	R4	B12	B45	B	7.6-18C-R4	standard	pH7.6	T.plus3C	466
737	7.6-18C	R4	B12	B45	B	7.6-18C-R4	standard	pH7.6	T.plus3C	531
738	7.6-18C	R4	B12	B45	B	7.6-18C-R4	standard	pH7.6	T.plus3C	488
739	7.6-18C	R4	B12	B45	B	7.6-18C-R4	standard	pH7.6	T.plus3C	406
740	7.6-18C	R4	B12	B45	B	7.6-18C-R4	standard	pH7.6	T.plus3C	398
741	7.6-18C	R4	B12	B45	B	7.6-18C-R4	standard	pH7.6	T.plus3C	564
742	7.6-18C	R4	B12	B45	B	7.6-18C-R4	standard	pH7.6	T.plus3C	346
743	7.6-18C	R4	B12	B45	B	7.6-18C-R4	standard	pH7.6	T.plus3C	384
744	7.6-18C	R4	B12	B45	B	7.6-18C-R4	standard	pH7.6	T.plus3C	542
745	7.6-18C	R5	C9	B42	C	7.6-18C-R5	standard	pH7.6	T.plus3C	344
746	7.6-18C	R5	C9	B42	C	7.6-18C-R5	standard	pH7.6	T.plus3C	542
747	7.6-18C	R5	C9	B42	C	7.6-18C-R5	standard	pH7.6	T.plus3C	415
748	7.6-18C	R5	C9	B42	C	7.6-18C-R5	standard	pH7.6	T.plus3C	445
749	7.6-18C	R5	C9	B42	C	7.6-18C-R5	standard	pH7.6	T.plus3C	365
750	7.6-18C	R5	C9	B42	C	7.6-18C-R5	standard	pH7.6	T.plus3C	350
751	7.6-18C	R5	C9	B42	C	7.6-18C-R5	standard	pH7.6	T.plus3C	629
752	7.6-18C	R5	C9	B42	C	7.6-18C-R5	standard	pH7.6	T.plus3C	421
753	7.6-18C	R5	C9	B42	C	7.6-18C-R5	standard	pH7.6	T.plus3C	413
754	7.6-18C	R5	C9	B42	C	7.6-18C-R5	standard	pH7.6	T.plus3C	397
755	7.6-18C	R5	C9	B42	C	7.6-18C-R5	standard	pH7.6	T.plus3C	519
756	7.6-18C	R5	C9	B42	C	7.6-18C-R5	standard	pH7.6	T.plus3C	381
757	7.6-18C	R5	C9	B42	C	7.6-18C-R5	standard	pH7.6	T.plus3C	323
758	7.6-18C	R5	C9	B42	C	7.6-18C-R5	standard	pH7.6	T.plus3C	525
759	7.6-18C	R5	C9	B42	C	7.6-18C-R5	standard	pH7.6	T.plus3C	197
760	7.6-18C	R5	C9	B42	C	7.6-18C-R5	standard	pH7.6	T.plus3C	577
761	7.6-18C	R5	C9	B42	C	7.6-18C-R5	standard	pH7.6	T.plus3C	703
762	7.6-18C	R5	C9	B42	C	7.6-18C-R5	standard	pH7.6	T.plus3C	374
763	7.6-18C	R5	C9	B42	C	7.6-18C-R5	standard	pH7.6	T.plus3C	427
764	7.6-18C	R5	C9	B42	C	7.6-18C-R5	standard	pH7.6	T.plus3C	583
765	7.6-18C	R6	C12	B45	C	7.6-18C-R6	standard	pH7.6	T.plus3C	558
766	7.6-18C	R6	C12	B45	C	7.6-18C-R6	standard	pH7.6	T.plus3C	437
767	7.6-18C	R6	C12	B45	C	7.6-18C-R6	standard	pH7.6	T.plus3C	502
768	7.6-18C	R6	C12	B45	C	7.6-18C-R6	standard	pH7.6	T.plus3C	337
769	7.6-18C	R6	C12	B45	C	7.6-18C-R6	standard	pH7.6	T.plus3C	233
770	7.6-18C	R6	C12	B45	C	7.6-18C-R6	standard	pH7.6	T.plus3C	191
771	7.6-18C	R6	C12	B45	C	7.6-18C-R6	standard	pH7.6	T.plus3C	296
772	7.6-18C	R6	C12	B45	C	7.6-18C-R6	standard	pH7.6	T.plus3C	521
773	7.6-18C	R6	C12	B45	C	7.6-18C-R6	standard	pH7.6	T.plus3C	442
774	7.6-18C	R6	C12	B45	C	7.6-18C-R6	standard	pH7.6	T.plus3C	496
775	7.6-18C	R6	C12	B45	C	7.6-18C-R6	standard	pH7.6	T.plus3C	538
776	7.6-18C	R6	C12	B45	C	7.6-18C-R6	standard	pH7.6	T.plus3C	402
777	7.6-18C	R6	C12	B45	C	7.6-18C-R6	standard	pH7.6	T.plus3C	381
778	7.6-18C	R6	C12	B45	C	7.6-18C-R6	standard	pH7.6	T.plus3C	493
779	7.6-18C	R6	C12	B45	C	7.6-18C-R6	standard	pH7.6	T.plus3C	367
780	7.6-18C	R6	C12	B45	C	7.6-18C-R6	standard	pH7.6	T.plus3C	387
781	7.6-18C	R6	C12	B45	C	7.6-18C-R6	standard	pH7.6	T.plus3C	415
782	7.6-18C	R6	C12	B45	C	7.6-18C-R6	standard	pH7.6	T.plus3C	336
783	7.6-18C	R6	C12	B45	C	7.6-18C-R6	standard	pH7.6	T.plus3C	574
784	7.6-18C	R6	C12	B45	C	7.6-18C-R6	standard	pH7.6	T.plus3C	288
785	8.0-18C	R5	C7	B44	C	8.0-18C-R5	standard	pH8.0	T.plus3C	302
786	8.0-18C	R5	C7	B44	C	8.0-18C-R5	standard	pH8.0	T.plus3C	466
787	8.0-18C	R5	C7	B44	C	8.0-18C-R5	standard	pH8.0	T.plus3C	307
788	8.0-18C	R5	C7	B44	C	8.0-18C-R5	standard	pH8.0	T.plus3C	206
789	8.0-18C	R5	C7	B44	C	8.0-18C-R5	standard	pH8.0	T.plus3C	241
790	8.0-18C	R5	C7	B44	C	8.0-18C-R5	standard	pH8.0	T.plus3C	297
791	8.0-18C	R5	C7	B44	C	8.0-18C-R5	standard	pH8.0	T.plus3C	288
792	8.0-18C	R5	C7	B44	C	8.0-18C-R5	standard	pH8.0	T.plus3C	188
793	8.0-18C	R5	C7	B44	C	8.0-18C-R5	standard	pH8.0	T.plus3C	335
794	8.0-18C	R5	C7	B44	C	8.0-18C-R5	standard	pH8.0	T.plus3C	402
795	8.0-18C	R5	C7	B44	C	8.0-18C-R5	standard	pH8.0	T.plus3C	372
796	8.0-18C	R5	C7	B44	C	8.0-18C-R5	standard	pH8.0	T.plus3C	388
797	8.0-18C	R5	C7	B44	C	8.0-18C-R5	standard	pH8.0	T.plus3C	349
798	8.0-18C	R5	C7	B44	C	8.0-18C-R5	standard	pH8.0	T.plus3C	215
799	8.0-18C	R5	C7	B44	C	8.0-18C-R5	standard	pH8.0	T.plus3C	293
800	8.0-18C	R5	C7	B44	C	8.0-18C-R5	standard	pH8.0	T.plus3C	304
801	8.0-18C	R5	C7	B44	C	8.0-18C-R5	standard	pH8.0	T.plus3C	201
802	8.0-18C	R5	C7	B44	C	8.0-18C-R5	standard	pH8.0	T.plus3C	349
803	8.0-18C	R5	C7	B44	C	8.0-18C-R5	standard	pH8.0	T.plus3C	412
804	8.0-18C	R5	C7	B44	C	8.0-18C-R5	standard	pH8.0	T.plus3C	555
805	8.0-18C	R6	C10	B46	C	8.0-18C-R6	standard	pH8.0	T.plus3C	163
806	8.0-18C	R6	C10	B46	C	8.0-18C-R6	standard	pH8.0	T.plus3C	455
807	8.0-18C	R6	C10	B46	C	8.0-18C-R6	standard	pH8.0	T.plus3C	363
808	8.0-18C	R6	C10	B46	C	8.0-18C-R6	standard	pH8.0	T.plus3C	211
809	8.0-18C	R6	C10	B46	C	8.0-18C-R6	standard	pH8.0	T.plus3C	270
810	8.0-18C	R6	C10	B46	C	8.0-18C-R6	standard	pH8.0	T.plus3C	220
811	8.0-18C	R6	C10	B46	C	8.0-18C-R6	standard	pH8.0	T.plus3C	370
812	8.0-18C	R6	C10	B46	C	8.0-18C-R6	standard	pH8.0	T.plus3C	353
813	8.0-18C	R6	C10	B46	C	8.0-18C-R6	standard	pH8.0	T.plus3C	488
814	8.0-18C	R6	C10	B46	C	8.0-18C-R6	standard	pH8.0	T.plus3C	157
815	8.0-18C	R6	C10	B46	C	8.0-18C-R6	standard	pH8.0	T.plus3C	294
816	8.0-18C	R6	C10	B46	C	8.0-18C-R6	standard	pH8.0	T.plus3C	406
817	8.0-18C	R6	C10	B46	C	8.0-18C-R6	standard	pH8.0	T.plus3C	437
818	8.0-18C	R6	C10	B46	C	8.0-18C-R6	standard	pH8.0	T.plus3C	225
819	8.0-18C	R6	C10	B46	C	8.0-18C-R6	standard	pH8.0	T.plus3C	472
820	8.0-18C	R6	C10	B46	C	8.0-18C-R6	standard	pH8.0	T.plus3C	553
821	8.0-18C	R6	C10	B46	C	8.0-18C-R6	standard	pH8.0	T.plus3C	358
822	8.0-18C	R6	C10	B46	C	8.0-18C-R6	standard	pH8.0	T.plus3C	494
823	8.0-18C	R6	C10	B46	C	8.0-18C-R6	standard	pH8.0	T.plus3C	483
824	8.0-18C	R6	C10	B46	C	8.0-18C-R6	standard	pH8.0	T.plus3C	418
825	8.4-18C	R5	C8	B43	C	8.4-18C-R5	standard	pH8.4	T.plus3C	141
826	8.4-18C	R5	C8	B43	C	8.4-18C-R5	standard	pH8.4	T.plus3C	193
827	8.4-18C	R5	C8	B43	C	8.4-18C-R5	standard	pH8.4	T.plus3C	283
828	8.4-18C	R5	C8	B43	C	8.4-18C-R5	standard	pH8.4	T.plus3C	251
829	8.4-18C	R5	C8	B43	C	8.4-18C-R5	standard	pH8.4	T.plus3C	218
830	8.4-18C	R5	C8	B43	C	8.4-18C-R5	standard	pH8.4	T.plus3C	270
831	8.4-18C	R5	C8	B43	C	8.4-18C-R5	standard	pH8.4	T.plus3C	343
832	8.4-18C	R5	C8	B43	C	8.4-18C-R5	standard	pH8.4	T.plus3C	256
833	8.4-18C	R5	C8	B43	C	8.4-18C-R5	standard	pH8.4	T.plus3C	118
834	8.4-18C	R5	C8	B43	C	8.4-18C-R5	standard	pH8.4	T.plus3C	195
835	8.4-18C	R5	C8	B43	C	8.4-18C-R5	standard	pH8.4	T.plus3C	225
836	8.4-18C	R5	C8	B43	C	8.4-18C-R5	standard	pH8.4	T.plus3C	242
837	8.4-18C	R5	C8	B43	C	8.4-18C-R5	standard	pH8.4	T.plus3C	282
838	8.4-18C	R5	C8	B43	C	8.4-18C-R5	standard	pH8.4	T.plus3C	318
839	8.4-18C	R5	C8	B43	C	8.4-18C-R5	standard	pH8.4	T.plus3C	125
840	8.4-18C	R5	C8	B43	C	8.4-18C-R5	standard	pH8.4	T.plus3C	234
841	8.4-18C	R5	C8	B43	C	8.4-18C-R5	standard	pH8.4	T.plus3C	215
842	8.4-18C	R5	C8	B43	C	8.4-18C-R5	standard	pH8.4	T.plus3C	256
843	8.4-18C	R5	C8	B43	C	8.4-18C-R5	standard	pH8.4	T.plus3C	311
844	8.4-18C	R5	C8	B43	C	8.4-18C-R5	standard	pH8.4	T.plus3C	297
845	8.4-18C	R6	C11	B47	C	8.4-18C-R6	standard	pH8.4	T.plus3C	177
846	8.4-18C	R6	C11	B47	C	8.4-18C-R6	standard	pH8.4	T.plus3C	243
847	8.4-18C	R6	C11	B47	C	8.4-18C-R6	standard	pH8.4	T.plus3C	245
848	8.4-18C	R6	C11	B47	C	8.4-18C-R6	standard	pH8.4	T.plus3C	258
849	8.4-18C	R6	C11	B47	C	8.4-18C-R6	standard	pH8.4	T.plus3C	225
850	8.4-18C	R6	C11	B47	C	8.4-18C-R6	standard	pH8.4	T.plus3C	245
851	8.4-18C	R6	C11	B47	C	8.4-18C-R6	standard	pH8.4	T.plus3C	183
852	8.4-18C	R6	C11	B47	C	8.4-18C-R6	standard	pH8.4	T.plus3C	200
853	8.4-18C	R6	C11	B47	C	8.4-18C-R6	standard	pH8.4	T.plus3C	234
854	8.4-18C	R6	C11	B47	C	8.4-18C-R6	standard	pH8.4	T.plus3C	250
855	8.4-18C	R6	C11	B47	C	8.4-18C-R6	standard	pH8.4	T.plus3C	316
856	8.4-18C	R6	C11	B47	C	8.4-18C-R6	standard	pH8.4	T.plus3C	256
857	8.4-18C	R6	C11	B47	C	8.4-18C-R6	standard	pH8.4	T.plus3C	386
858	8.4-18C	R6	C11	B47	C	8.4-18C-R6	standard	pH8.4	T.plus3C	129
859	8.4-18C	R6	C11	B47	C	8.4-18C-R6	standard	pH8.4	T.plus3C	246
860	8.4-18C	R6	C11	B47	C	8.4-18C-R6	standard	pH8.4	T.plus3C	223
861	8.4-18C	R6	C11	B47	C	8.4-18C-R6	standard	pH8.4	T.plus3C	232
862	8.4-18C	R6	C11	B47	C	8.4-18C-R6	standard	pH8.4	T.plus3C	244
863	8.4-18C	R6	C11	B47	C	8.4-18C-R6	standard	pH8.4	T.plus3C	318
864	8.4-18C	R6	C11	B47	C	8.4-18C-R6	standard	pH8.4	T.plus3C	300
865	7.6-15C	R1	G1	B4	G	7.6-15C-R1	limited	pH7.6	T.ambient	360
866	7.6-15C	R1	G1	B4	G	7.6-15C-R1	limited	pH7.6	T.ambient	370
867	7.6-15C	R1	G1	B4	G	7.6-15C-R1	limited	pH7.6	T.ambient	310
868	7.6-15C	R1	G1	B4	G	7.6-15C-R1	limited	pH7.6	T.ambient	266
869	7.6-15C	R1	G1	B4	G	7.6-15C-R1	limited	pH7.6	T.ambient	383
870	7.6-15C	R1	G1	B4	G	7.6-15C-R1	limited	pH7.6	T.ambient	392
871	7.6-15C	R1	G1	B4	G	7.6-15C-R1	limited	pH7.6	T.ambient	159
872	7.6-15C	R1	G1	B4	G	7.6-15C-R1	limited	pH7.6	T.ambient	166
873	7.6-15C	R1	G1	B4	G	7.6-15C-R1	limited	pH7.6	T.ambient	227
874	7.6-15C	R1	G1	B4	G	7.6-15C-R1	limited	pH7.6	T.ambient	168
875	7.6-15C	R1	G1	B4	G	7.6-15C-R1	limited	pH7.6	T.ambient	171
876	7.6-15C	R1	G1	B4	G	7.6-15C-R1	limited	pH7.6	T.ambient	223
877	7.6-15C	R1	G1	B4	G	7.6-15C-R1	limited	pH7.6	T.ambient	205
878	7.6-15C	R1	G1	B4	G	7.6-15C-R1	limited	pH7.6	T.ambient	200
879	7.6-15C	R1	G1	B4	G	7.6-15C-R1	limited	pH7.6	T.ambient	176
880	7.6-15C	R1	G1	B4	G	7.6-15C-R1	limited	pH7.6	T.ambient	259
881	7.6-15C	R1	G1	B4	G	7.6-15C-R1	limited	pH7.6	T.ambient	164
882	7.6-15C	R1	G1	B4	G	7.6-15C-R1	limited	pH7.6	T.ambient	224
883	7.6-15C	R1	G1	B4	G	7.6-15C-R1	limited	pH7.6	T.ambient	223
884	7.6-15C	R1	G1	B4	G	7.6-15C-R1	limited	pH7.6	T.ambient	242
885	7.6-15C	R1	G1	B4	G	7.6-15C-R1	limited	pH7.6	T.ambient	221
886	7.6-15C	R1	G1	B4	G	7.6-15C-R1	limited	pH7.6	T.ambient	249
887	7.6-15C	R1	G1	B4	G	7.6-15C-R1	limited	pH7.6	T.ambient	175
888	7.6-15C	R1	G1	B4	G	7.6-15C-R1	limited	pH7.6	T.ambient	239
889	7.6-15C	R1	G1	B4	G	7.6-15C-R1	limited	pH7.6	T.ambient	228
890	7.6-15C	R1	G1	B4	G	7.6-15C-R1	limited	pH7.6	T.ambient	230
891	7.6-15C	R1	G1	B4	G	7.6-15C-R1	limited	pH7.6	T.ambient	234
892	7.6-15C	R1	G1	B4	G	7.6-15C-R1	limited	pH7.6	T.ambient	277
893	7.6-15C	R1	G1	B4	G	7.6-15C-R1	limited	pH7.6	T.ambient	130
894	7.6-15C	R1	G1	B4	G	7.6-15C-R1	limited	pH7.6	T.ambient	220
895	7.6-15C	R1	G1	B4	G	7.6-15C-R1	limited	pH7.6	T.ambient	100
896	7.6-15C	R1	G1	B4	G	7.6-15C-R1	limited	pH7.6	T.ambient	330
897	7.6-15C	R1	G1	B4	G	7.6-15C-R1	limited	pH7.6	T.ambient	229
898	7.6-15C	R1	G1	B4	G	7.6-15C-R1	limited	pH7.6	T.ambient	180
899	7.6-15C	R1	G1	B4	G	7.6-15C-R1	limited	pH7.6	T.ambient	124
900	7.6-15C	R1	G1	B4	G	7.6-15C-R1	limited	pH7.6	T.ambient	146
901	7.6-15C	R2	G2	B7	G	7.6-15C-R2	limited	pH7.6	T.ambient	353
902	7.6-15C	R2	G2	B7	G	7.6-15C-R2	limited	pH7.6	T.ambient	230
903	7.6-15C	R2	G2	B7	G	7.6-15C-R2	limited	pH7.6	T.ambient	364
904	7.6-15C	R2	G2	B7	G	7.6-15C-R2	limited	pH7.6	T.ambient	183
905	7.6-15C	R2	G2	B7	G	7.6-15C-R2	limited	pH7.6	T.ambient	226
906	7.6-15C	R2	G2	B7	G	7.6-15C-R2	limited	pH7.6	T.ambient	231
907	7.6-15C	R2	G2	B7	G	7.6-15C-R2	limited	pH7.6	T.ambient	173
908	7.6-15C	R2	G2	B7	G	7.6-15C-R2	limited	pH7.6	T.ambient	168
909	7.6-15C	R2	G2	B7	G	7.6-15C-R2	limited	pH7.6	T.ambient	198
910	7.6-15C	R2	G2	B7	G	7.6-15C-R2	limited	pH7.6	T.ambient	254
911	7.6-15C	R2	G2	B7	G	7.6-15C-R2	limited	pH7.6	T.ambient	234
912	7.6-15C	R2	G2	B7	G	7.6-15C-R2	limited	pH7.6	T.ambient	201
913	7.6-15C	R2	G2	B7	G	7.6-15C-R2	limited	pH7.6	T.ambient	211
914	7.6-15C	R2	G2	B7	G	7.6-15C-R2	limited	pH7.6	T.ambient	235
915	7.6-15C	R2	G2	B7	G	7.6-15C-R2	limited	pH7.6	T.ambient	301
916	7.6-15C	R2	G2	B7	G	7.6-15C-R2	limited	pH7.6	T.ambient	300
917	7.6-15C	R2	G2	B7	G	7.6-15C-R2	limited	pH7.6	T.ambient	118
918	7.6-15C	R2	G2	B7	G	7.6-15C-R2	limited	pH7.6	T.ambient	121
919	7.6-15C	R2	G2	B7	G	7.6-15C-R2	limited	pH7.6	T.ambient	173
920	7.6-15C	R2	G2	B7	G	7.6-15C-R2	limited	pH7.6	T.ambient	302
921	7.6-15C	R2	G2	B7	G	7.6-15C-R2	limited	pH7.6	T.ambient	214
922	7.6-15C	R2	G2	B7	G	7.6-15C-R2	limited	pH7.6	T.ambient	155
923	7.6-15C	R2	G2	B7	G	7.6-15C-R2	limited	pH7.6	T.ambient	319
924	7.6-15C	R2	G2	B7	G	7.6-15C-R2	limited	pH7.6	T.ambient	157
925	7.6-15C	R3	G3	B3	H	7.6-15C-R3	limited	pH7.6	T.ambient	419
926	7.6-15C	R3	G3	B3	H	7.6-15C-R3	limited	pH7.6	T.ambient	448
927	7.6-15C	R3	G3	B3	H	7.6-15C-R3	limited	pH7.6	T.ambient	341
928	7.6-15C	R3	G3	B3	H	7.6-15C-R3	limited	pH7.6	T.ambient	372
929	7.6-15C	R3	G3	B3	H	7.6-15C-R3	limited	pH7.6	T.ambient	361
930	7.6-15C	R3	G3	B3	H	7.6-15C-R3	limited	pH7.6	T.ambient	307
931	7.6-15C	R3	G3	B3	H	7.6-15C-R3	limited	pH7.6	T.ambient	306
932	7.6-15C	R3	G3	B3	H	7.6-15C-R3	limited	pH7.6	T.ambient	316
933	7.6-15C	R3	G3	B3	H	7.6-15C-R3	limited	pH7.6	T.ambient	214
934	7.6-15C	R3	G3	B3	H	7.6-15C-R3	limited	pH7.6	T.ambient	152
935	7.6-15C	R3	G3	B3	H	7.6-15C-R3	limited	pH7.6	T.ambient	203
936	7.6-15C	R3	G3	B3	H	7.6-15C-R3	limited	pH7.6	T.ambient	221
937	7.6-15C	R3	G3	B3	H	7.6-15C-R3	limited	pH7.6	T.ambient	231
938	7.6-15C	R3	G3	B3	H	7.6-15C-R3	limited	pH7.6	T.ambient	163
939	7.6-15C	R3	G3	B3	H	7.6-15C-R3	limited	pH7.6	T.ambient	280
940	7.6-15C	R3	G3	B3	H	7.6-15C-R3	limited	pH7.6	T.ambient	259
941	7.6-15C	R3	G3	B3	H	7.6-15C-R3	limited	pH7.6	T.ambient	270
942	7.6-15C	R3	G3	B3	H	7.6-15C-R3	limited	pH7.6	T.ambient	309
943	7.6-15C	R3	G3	B3	H	7.6-15C-R3	limited	pH7.6	T.ambient	223
944	7.6-15C	R3	G3	B3	H	7.6-15C-R3	limited	pH7.6	T.ambient	219
945	7.6-15C	R3	G3	B3	H	7.6-15C-R3	limited	pH7.6	T.ambient	281
946	7.6-15C	R3	G3	B3	H	7.6-15C-R3	limited	pH7.6	T.ambient	190
947	7.6-15C	R3	G3	B3	H	7.6-15C-R3	limited	pH7.6	T.ambient	348
948	7.6-15C	R3	G3	B3	H	7.6-15C-R3	limited	pH7.6	T.ambient	279
949	7.6-15C	R3	G3	B3	H	7.6-15C-R3	limited	pH7.6	T.ambient	344
950	7.6-15C	R3	G3	B3	H	7.6-15C-R3	limited	pH7.6	T.ambient	257
951	7.6-15C	R3	G3	B3	H	7.6-15C-R3	limited	pH7.6	T.ambient	269
952	7.6-15C	R3	G3	B3	H	7.6-15C-R3	limited	pH7.6	T.ambient	293
953	7.6-15C	R3	G3	B3	H	7.6-15C-R3	limited	pH7.6	T.ambient	223
954	7.6-15C	R3	G3	B3	H	7.6-15C-R3	limited	pH7.6	T.ambient	121
955	8.0-15C	R1	G4	B2	G	8.0-15C-R1	limited	pH8.0	T.ambient	232
956	8.0-15C	R1	G4	B2	G	8.0-15C-R1	limited	pH8.0	T.ambient	188
957	8.0-15C	R1	G4	B2	G	8.0-15C-R1	limited	pH8.0	T.ambient	180
958	8.0-15C	R1	G4	B2	G	8.0-15C-R1	limited	pH8.0	T.ambient	142
959	8.0-15C	R1	G4	B2	G	8.0-15C-R1	limited	pH8.0	T.ambient	173
960	8.0-15C	R1	G4	B2	G	8.0-15C-R1	limited	pH8.0	T.ambient	182
961	8.0-15C	R1	G4	B2	G	8.0-15C-R1	limited	pH8.0	T.ambient	220
962	8.0-15C	R1	G4	B2	G	8.0-15C-R1	limited	pH8.0	T.ambient	356
963	8.0-15C	R1	G4	B2	G	8.0-15C-R1	limited	pH8.0	T.ambient	260
964	8.0-15C	R1	G4	B2	G	8.0-15C-R1	limited	pH8.0	T.ambient	234
965	8.0-15C	R1	G4	B2	G	8.0-15C-R1	limited	pH8.0	T.ambient	183
966	8.0-15C	R1	G4	B2	G	8.0-15C-R1	limited	pH8.0	T.ambient	192
967	8.0-15C	R1	G4	B2	G	8.0-15C-R1	limited	pH8.0	T.ambient	193
968	8.0-15C	R1	G4	B2	G	8.0-15C-R1	limited	pH8.0	T.ambient	152
969	8.0-15C	R1	G4	B2	G	8.0-15C-R1	limited	pH8.0	T.ambient	132
970	8.0-15C	R1	G4	B2	G	8.0-15C-R1	limited	pH8.0	T.ambient	144
971	8.0-15C	R1	G4	B2	G	8.0-15C-R1	limited	pH8.0	T.ambient	155
972	8.0-15C	R1	G4	B2	G	8.0-15C-R1	limited	pH8.0	T.ambient	229
973	8.0-15C	R1	G4	B2	G	8.0-15C-R1	limited	pH8.0	T.ambient	174
974	8.0-15C	R1	G4	B2	G	8.0-15C-R1	limited	pH8.0	T.ambient	160
975	8.0-15C	R1	G4	B2	G	8.0-15C-R1	limited	pH8.0	T.ambient	253
976	8.0-15C	R2	G5	B5	G	8.0-15C-R2	limited	pH8.0	T.ambient	284
977	8.0-15C	R2	G5	B5	G	8.0-15C-R2	limited	pH8.0	T.ambient	140
978	8.0-15C	R2	G5	B5	G	8.0-15C-R2	limited	pH8.0	T.ambient	252
979	8.0-15C	R2	G5	B5	G	8.0-15C-R2	limited	pH8.0	T.ambient	193
980	8.0-15C	R2	G5	B5	G	8.0-15C-R2	limited	pH8.0	T.ambient	189
981	8.0-15C	R2	G5	B5	G	8.0-15C-R2	limited	pH8.0	T.ambient	233
982	8.0-15C	R2	G5	B5	G	8.0-15C-R2	limited	pH8.0	T.ambient	235
983	8.0-15C	R2	G5	B5	G	8.0-15C-R2	limited	pH8.0	T.ambient	242
984	8.0-15C	R2	G5	B5	G	8.0-15C-R2	limited	pH8.0	T.ambient	198
985	8.0-15C	R2	G5	B5	G	8.0-15C-R2	limited	pH8.0	T.ambient	160
986	8.0-15C	R2	G5	B5	G	8.0-15C-R2	limited	pH8.0	T.ambient	76
987	8.0-15C	R2	G5	B5	G	8.0-15C-R2	limited	pH8.0	T.ambient	158
988	8.0-15C	R2	G5	B5	G	8.0-15C-R2	limited	pH8.0	T.ambient	166
989	8.0-15C	R2	G5	B5	G	8.0-15C-R2	limited	pH8.0	T.ambient	172
990	8.0-15C	R2	G5	B5	G	8.0-15C-R2	limited	pH8.0	T.ambient	75
991	8.0-15C	R2	G5	B5	G	8.0-15C-R2	limited	pH8.0	T.ambient	172
992	8.0-15C	R2	G5	B5	G	8.0-15C-R2	limited	pH8.0	T.ambient	139
993	8.0-15C	R2	G5	B5	G	8.0-15C-R2	limited	pH8.0	T.ambient	190
994	8.0-15C	R2	G5	B5	G	8.0-15C-R2	limited	pH8.0	T.ambient	169
995	8.0-15C	R2	G5	B5	G	8.0-15C-R2	limited	pH8.0	T.ambient	239
996	8.0-15C	R2	G5	B5	G	8.0-15C-R2	limited	pH8.0	T.ambient	128
997	8.0-15C	R2	G5	B5	G	8.0-15C-R2	limited	pH8.0	T.ambient	102
998	8.0-15C	R3	G6	B2	H	8.0-15C-R3	limited	pH8.0	T.ambient	196
999	8.0-15C	R3	G6	B2	H	8.0-15C-R3	limited	pH8.0	T.ambient	113
1000	8.0-15C	R3	G6	B2	H	8.0-15C-R3	limited	pH8.0	T.ambient	244
1001	8.0-15C	R3	G6	B2	H	8.0-15C-R3	limited	pH8.0	T.ambient	244
1002	8.0-15C	R3	G6	B2	H	8.0-15C-R3	limited	pH8.0	T.ambient	61
1003	8.0-15C	R3	G6	B2	H	8.0-15C-R3	limited	pH8.0	T.ambient	206
1004	8.0-15C	R3	G6	B2	H	8.0-15C-R3	limited	pH8.0	T.ambient	190
1005	8.0-15C	R3	G6	B2	H	8.0-15C-R3	limited	pH8.0	T.ambient	241
1006	8.0-15C	R3	G6	B2	H	8.0-15C-R3	limited	pH8.0	T.ambient	182
1007	8.0-15C	R3	G6	B2	H	8.0-15C-R3	limited	pH8.0	T.ambient	204
1008	8.0-15C	R3	G6	B2	H	8.0-15C-R3	limited	pH8.0	T.ambient	223
1009	8.0-15C	R3	G6	B2	H	8.0-15C-R3	limited	pH8.0	T.ambient	99
1010	8.0-15C	R3	G6	B2	H	8.0-15C-R3	limited	pH8.0	T.ambient	106
1011	8.0-15C	R3	G6	B2	H	8.0-15C-R3	limited	pH8.0	T.ambient	106
1012	8.0-15C	R3	G6	B2	H	8.0-15C-R3	limited	pH8.0	T.ambient	125
1013	8.0-15C	R3	G6	B2	H	8.0-15C-R3	limited	pH8.0	T.ambient	156
1014	8.0-15C	R3	G6	B2	H	8.0-15C-R3	limited	pH8.0	T.ambient	84
1015	8.0-15C	R3	G6	B2	H	8.0-15C-R3	limited	pH8.0	T.ambient	120
1016	8.0-15C	R3	G6	B2	H	8.0-15C-R3	limited	pH8.0	T.ambient	155
1017	8.0-15C	R3	G6	B2	H	8.0-15C-R3	limited	pH8.0	T.ambient	157
1018	8.0-15C	R3	G6	B2	H	8.0-15C-R3	limited	pH8.0	T.ambient	141
1019	8.0-15C	R3	G6	B2	H	8.0-15C-R3	limited	pH8.0	T.ambient	156
1020	8.0-15C	R3	G6	B2	H	8.0-15C-R3	limited	pH8.0	T.ambient	215
1021	8.4-15C	R1	G7	B3	G	8.4-15C-R1	limited	pH8.4	T.ambient	221
1022	8.4-15C	R1	G7	B3	G	8.4-15C-R1	limited	pH8.4	T.ambient	84
1023	8.4-15C	R1	G7	B3	G	8.4-15C-R1	limited	pH8.4	T.ambient	187
1024	8.4-15C	R1	G7	B3	G	8.4-15C-R1	limited	pH8.4	T.ambient	309
1025	8.4-15C	R1	G7	B3	G	8.4-15C-R1	limited	pH8.4	T.ambient	115
1026	8.4-15C	R1	G7	B3	G	8.4-15C-R1	limited	pH8.4	T.ambient	197
1027	8.4-15C	R1	G7	B3	G	8.4-15C-R1	limited	pH8.4	T.ambient	79
1028	8.4-15C	R1	G7	B3	G	8.4-15C-R1	limited	pH8.4	T.ambient	117
1029	8.4-15C	R1	G7	B3	G	8.4-15C-R1	limited	pH8.4	T.ambient	141
1030	8.4-15C	R1	G7	B3	G	8.4-15C-R1	limited	pH8.4	T.ambient	138
1031	8.4-15C	R1	G7	B3	G	8.4-15C-R1	limited	pH8.4	T.ambient	87
1032	8.4-15C	R1	G7	B3	G	8.4-15C-R1	limited	pH8.4	T.ambient	127
1033	8.4-15C	R1	G7	B3	G	8.4-15C-R1	limited	pH8.4	T.ambient	150
1034	8.4-15C	R1	G7	B3	G	8.4-15C-R1	limited	pH8.4	T.ambient	71
1035	8.4-15C	R1	G7	B3	G	8.4-15C-R1	limited	pH8.4	T.ambient	86
1036	8.4-15C	R1	G7	B3	G	8.4-15C-R1	limited	pH8.4	T.ambient	111
1037	8.4-15C	R1	G7	B3	G	8.4-15C-R1	limited	pH8.4	T.ambient	100
1038	8.4-15C	R1	G7	B3	G	8.4-15C-R1	limited	pH8.4	T.ambient	164
1039	8.4-15C	R1	G7	B3	G	8.4-15C-R1	limited	pH8.4	T.ambient	127
1040	8.4-15C	R1	G7	B3	G	8.4-15C-R1	limited	pH8.4	T.ambient	195
1041	8.4-15C	R2	G8	B6	G	8.4-15C-R2	limited	pH8.4	T.ambient	88
1042	8.4-15C	R2	G8	B6	G	8.4-15C-R2	limited	pH8.4	T.ambient	69
1043	8.4-15C	R2	G8	B6	G	8.4-15C-R2	limited	pH8.4	T.ambient	117
1044	8.4-15C	R2	G8	B6	G	8.4-15C-R2	limited	pH8.4	T.ambient	256
1045	8.4-15C	R2	G8	B6	G	8.4-15C-R2	limited	pH8.4	T.ambient	59
1046	8.4-15C	R2	G8	B6	G	8.4-15C-R2	limited	pH8.4	T.ambient	88
1047	8.4-15C	R2	G8	B6	G	8.4-15C-R2	limited	pH8.4	T.ambient	103
1048	8.4-15C	R2	G8	B6	G	8.4-15C-R2	limited	pH8.4	T.ambient	168
1049	8.4-15C	R2	G8	B6	G	8.4-15C-R2	limited	pH8.4	T.ambient	193
1050	8.4-15C	R2	G8	B6	G	8.4-15C-R2	limited	pH8.4	T.ambient	150
1051	8.4-15C	R2	G8	B6	G	8.4-15C-R2	limited	pH8.4	T.ambient	250
1052	8.4-15C	R2	G8	B6	G	8.4-15C-R2	limited	pH8.4	T.ambient	168
1053	8.4-15C	R2	G8	B6	G	8.4-15C-R2	limited	pH8.4	T.ambient	105
1054	8.4-15C	R2	G8	B6	G	8.4-15C-R2	limited	pH8.4	T.ambient	163
1055	8.4-15C	R2	G8	B6	G	8.4-15C-R2	limited	pH8.4	T.ambient	149
1056	8.4-15C	R2	G8	B6	G	8.4-15C-R2	limited	pH8.4	T.ambient	152
1057	8.4-15C	R2	G8	B6	G	8.4-15C-R2	limited	pH8.4	T.ambient	149
1058	8.4-15C	R2	G8	B6	G	8.4-15C-R2	limited	pH8.4	T.ambient	164
1059	8.4-15C	R2	G8	B6	G	8.4-15C-R2	limited	pH8.4	T.ambient	153
1060	8.4-15C	R2	G8	B6	G	8.4-15C-R2	limited	pH8.4	T.ambient	170
1061	8.4-15C	R2	G8	B6	G	8.4-15C-R2	limited	pH8.4	T.ambient	185
1062	8.4-15C	R2	G8	B6	G	8.4-15C-R2	limited	pH8.4	T.ambient	104
1063	8.4-15C	R2	G8	B6	G	8.4-15C-R2	limited	pH8.4	T.ambient	186
1064	8.4-15C	R3	G9	B4	H	8.4-15C-R3	limited	pH8.4	T.ambient	128
1065	8.4-15C	R3	G9	B4	H	8.4-15C-R3	limited	pH8.4	T.ambient	40
1066	8.4-15C	R3	G9	B4	H	8.4-15C-R3	limited	pH8.4	T.ambient	99
1067	8.4-15C	R3	G9	B4	H	8.4-15C-R3	limited	pH8.4	T.ambient	251
1068	8.4-15C	R3	G9	B4	H	8.4-15C-R3	limited	pH8.4	T.ambient	98
1069	8.4-15C	R3	G9	B4	H	8.4-15C-R3	limited	pH8.4	T.ambient	65
1070	8.4-15C	R3	G9	B4	H	8.4-15C-R3	limited	pH8.4	T.ambient	123
1071	8.4-15C	R3	G9	B4	H	8.4-15C-R3	limited	pH8.4	T.ambient	130
1072	8.4-15C	R3	G9	B4	H	8.4-15C-R3	limited	pH8.4	T.ambient	90
1073	8.4-15C	R3	G9	B4	H	8.4-15C-R3	limited	pH8.4	T.ambient	202
1074	8.4-15C	R3	G9	B4	H	8.4-15C-R3	limited	pH8.4	T.ambient	114
1075	8.4-15C	R3	G9	B4	H	8.4-15C-R3	limited	pH8.4	T.ambient	140
1076	8.4-15C	R3	G9	B4	H	8.4-15C-R3	limited	pH8.4	T.ambient	115
1077	8.4-15C	R3	G9	B4	H	8.4-15C-R3	limited	pH8.4	T.ambient	104
1078	8.4-15C	R3	G9	B4	H	8.4-15C-R3	limited	pH8.4	T.ambient	113
1079	8.4-15C	R3	G9	B4	H	8.4-15C-R3	limited	pH8.4	T.ambient	110
1080	8.4-15C	R3	G9	B4	H	8.4-15C-R3	limited	pH8.4	T.ambient	75
1081	8.4-15C	R3	G9	B4	H	8.4-15C-R3	limited	pH8.4	T.ambient	138
1082	8.4-15C	R3	G9	B4	H	8.4-15C-R3	limited	pH8.4	T.ambient	175
1083	8.4-15C	R3	G9	B4	H	8.4-15C-R3	limited	pH8.4	T.ambient	205
1084	8.4-15C	R3	G9	B4	H	8.4-15C-R3	limited	pH8.4	T.ambient	144
1085	7.6-18C	R1	G10	B42	G	7.6-18C-R1	limited	pH7.6	T.plus3C	126
1086	7.6-18C	R1	G10	B42	G	7.6-18C-R1	limited	pH7.6	T.plus3C	165
1087	7.6-18C	R1	G10	B42	G	7.6-18C-R1	limited	pH7.6	T.plus3C	111
1088	7.6-18C	R1	G10	B42	G	7.6-18C-R1	limited	pH7.6	T.plus3C	133
1089	7.6-18C	R1	G10	B42	G	7.6-18C-R1	limited	pH7.6	T.plus3C	84
1090	7.6-18C	R1	G10	B42	G	7.6-18C-R1	limited	pH7.6	T.plus3C	169
1091	7.6-18C	R1	G10	B42	G	7.6-18C-R1	limited	pH7.6	T.plus3C	161
1092	7.6-18C	R1	G10	B42	G	7.6-18C-R1	limited	pH7.6	T.plus3C	182
1093	7.6-18C	R1	G10	B42	G	7.6-18C-R1	limited	pH7.6	T.plus3C	129
1094	7.6-18C	R1	G10	B42	G	7.6-18C-R1	limited	pH7.6	T.plus3C	103
1095	7.6-18C	R1	G10	B42	G	7.6-18C-R1	limited	pH7.6	T.plus3C	103
1096	7.6-18C	R1	G10	B42	G	7.6-18C-R1	limited	pH7.6	T.plus3C	158
1097	7.6-18C	R1	G10	B42	G	7.6-18C-R1	limited	pH7.6	T.plus3C	98
1098	7.6-18C	R1	G10	B42	G	7.6-18C-R1	limited	pH7.6	T.plus3C	100
1099	7.6-18C	R1	G10	B42	G	7.6-18C-R1	limited	pH7.6	T.plus3C	97
1100	7.6-18C	R1	G10	B42	G	7.6-18C-R1	limited	pH7.6	T.plus3C	133
1101	7.6-18C	R1	G10	B42	G	7.6-18C-R1	limited	pH7.6	T.plus3C	313
1102	7.6-18C	R1	G10	B42	G	7.6-18C-R1	limited	pH7.6	T.plus3C	485
1103	7.6-18C	R1	G10	B42	G	7.6-18C-R1	limited	pH7.6	T.plus3C	431
1104	7.6-18C	R1	G10	B42	G	7.6-18C-R1	limited	pH7.6	T.plus3C	275
1105	7.6-18C	R1	G10	B42	G	7.6-18C-R1	limited	pH7.6	T.plus3C	341
1106	7.6-18C	R2	G11	B45	G	7.6-18C-R2	limited	pH7.6	T.plus3C	125
1107	7.6-18C	R2	G11	B45	G	7.6-18C-R2	limited	pH7.6	T.plus3C	226
1108	7.6-18C	R2	G11	B45	G	7.6-18C-R2	limited	pH7.6	T.plus3C	270
1109	7.6-18C	R2	G11	B45	G	7.6-18C-R2	limited	pH7.6	T.plus3C	363
1110	7.6-18C	R2	G11	B45	G	7.6-18C-R2	limited	pH7.6	T.plus3C	208
1111	7.6-18C	R2	G11	B45	G	7.6-18C-R2	limited	pH7.6	T.plus3C	97
1112	7.6-18C	R2	G11	B45	G	7.6-18C-R2	limited	pH7.6	T.plus3C	164
1113	7.6-18C	R2	G11	B45	G	7.6-18C-R2	limited	pH7.6	T.plus3C	241
1114	7.6-18C	R2	G11	B45	G	7.6-18C-R2	limited	pH7.6	T.plus3C	139
1115	7.6-18C	R2	G11	B45	G	7.6-18C-R2	limited	pH7.6	T.plus3C	148
1116	7.6-18C	R2	G11	B45	G	7.6-18C-R2	limited	pH7.6	T.plus3C	130
1117	7.6-18C	R2	G11	B45	G	7.6-18C-R2	limited	pH7.6	T.plus3C	99
1118	7.6-18C	R2	G11	B45	G	7.6-18C-R2	limited	pH7.6	T.plus3C	102
1119	7.6-18C	R2	G11	B45	G	7.6-18C-R2	limited	pH7.6	T.plus3C	136
1120	7.6-18C	R2	G11	B45	G	7.6-18C-R2	limited	pH7.6	T.plus3C	162
1121	7.6-18C	R2	G11	B45	G	7.6-18C-R2	limited	pH7.6	T.plus3C	124
1122	7.6-18C	R2	G11	B45	G	7.6-18C-R2	limited	pH7.6	T.plus3C	224
1123	7.6-18C	R2	G11	B45	G	7.6-18C-R2	limited	pH7.6	T.plus3C	200
1124	7.6-18C	R2	G11	B45	G	7.6-18C-R2	limited	pH7.6	T.plus3C	196
1125	7.6-18C	R2	G11	B45	G	7.6-18C-R2	limited	pH7.6	T.plus3C	157
1126	7.6-18C	R3	G12	B44	H	7.6-18C-R3	limited	pH7.6	T.plus3C	167
1127	7.6-18C	R3	G12	B44	H	7.6-18C-R3	limited	pH7.6	T.plus3C	268
1128	7.6-18C	R3	G12	B44	H	7.6-18C-R3	limited	pH7.6	T.plus3C	237
1129	7.6-18C	R3	G12	B44	H	7.6-18C-R3	limited	pH7.6	T.plus3C	266
1130	7.6-18C	R3	G12	B44	H	7.6-18C-R3	limited	pH7.6	T.plus3C	279
1131	7.6-18C	R3	G12	B44	H	7.6-18C-R3	limited	pH7.6	T.plus3C	170
1132	7.6-18C	R3	G12	B44	H	7.6-18C-R3	limited	pH7.6	T.plus3C	98
1133	7.6-18C	R3	G12	B44	H	7.6-18C-R3	limited	pH7.6	T.plus3C	318
1134	7.6-18C	R3	G12	B44	H	7.6-18C-R3	limited	pH7.6	T.plus3C	132
1135	7.6-18C	R3	G12	B44	H	7.6-18C-R3	limited	pH7.6	T.plus3C	128
1136	7.6-18C	R3	G12	B44	H	7.6-18C-R3	limited	pH7.6	T.plus3C	138
1137	7.6-18C	R3	G12	B44	H	7.6-18C-R3	limited	pH7.6	T.plus3C	150
1138	7.6-18C	R3	G12	B44	H	7.6-18C-R3	limited	pH7.6	T.plus3C	193
1139	7.6-18C	R3	G12	B44	H	7.6-18C-R3	limited	pH7.6	T.plus3C	133
1140	7.6-18C	R3	G12	B44	H	7.6-18C-R3	limited	pH7.6	T.plus3C	137
1141	7.6-18C	R3	G12	B44	H	7.6-18C-R3	limited	pH7.6	T.plus3C	213
1142	7.6-18C	R3	G12	B44	H	7.6-18C-R3	limited	pH7.6	T.plus3C	135
1143	7.6-18C	R3	G12	B44	H	7.6-18C-R3	limited	pH7.6	T.plus3C	189
1144	7.6-18C	R3	G12	B44	H	7.6-18C-R3	limited	pH7.6	T.plus3C	142
1145	7.6-18C	R3	G12	B44	H	7.6-18C-R3	limited	pH7.6	T.plus3C	214
1146	7.6-18C	R3	G12	B44	H	7.6-18C-R3	limited	pH7.6	T.plus3C	116
1147	8.0-18C	R1	G13	B43	G	8.0-18C-R1	limited	pH8.0	T.plus3C	151
1148	8.0-18C	R1	G13	B43	G	8.0-18C-R1	limited	pH8.0	T.plus3C	102
1149	8.0-18C	R1	G13	B43	G	8.0-18C-R1	limited	pH8.0	T.plus3C	188
1150	8.0-18C	R1	G13	B43	G	8.0-18C-R1	limited	pH8.0	T.plus3C	110
1151	8.0-18C	R1	G13	B43	G	8.0-18C-R1	limited	pH8.0	T.plus3C	149
1152	8.0-18C	R1	G13	B43	G	8.0-18C-R1	limited	pH8.0	T.plus3C	238
1153	8.0-18C	R1	G13	B43	G	8.0-18C-R1	limited	pH8.0	T.plus3C	102
1154	8.0-18C	R1	G13	B43	G	8.0-18C-R1	limited	pH8.0	T.plus3C	159
1155	8.0-18C	R1	G13	B43	G	8.0-18C-R1	limited	pH8.0	T.plus3C	168
1156	8.0-18C	R1	G13	B43	G	8.0-18C-R1	limited	pH8.0	T.plus3C	123
1157	8.0-18C	R1	G13	B43	G	8.0-18C-R1	limited	pH8.0	T.plus3C	124
1158	8.0-18C	R1	G13	B43	G	8.0-18C-R1	limited	pH8.0	T.plus3C	108
1159	8.0-18C	R1	G13	B43	G	8.0-18C-R1	limited	pH8.0	T.plus3C	93
1160	8.0-18C	R1	G13	B43	G	8.0-18C-R1	limited	pH8.0	T.plus3C	91
1161	8.0-18C	R1	G13	B43	G	8.0-18C-R1	limited	pH8.0	T.plus3C	113
1162	8.0-18C	R1	G13	B43	G	8.0-18C-R1	limited	pH8.0	T.plus3C	84
1163	8.0-18C	R1	G13	B43	G	8.0-18C-R1	limited	pH8.0	T.plus3C	104
1164	8.0-18C	R1	G13	B43	G	8.0-18C-R1	limited	pH8.0	T.plus3C	113
1165	8.0-18C	R1	G13	B43	G	8.0-18C-R1	limited	pH8.0	T.plus3C	76
1166	8.0-18C	R1	G13	B43	G	8.0-18C-R1	limited	pH8.0	T.plus3C	88
1167	8.0-18C	R1	G13	B43	G	8.0-18C-R1	limited	pH8.0	T.plus3C	77
1168	8.0-18C	R2	G14	B46	G	8.0-18C-R2	limited	pH8.0	T.plus3C	170
1169	8.0-18C	R2	G14	B46	G	8.0-18C-R2	limited	pH8.0	T.plus3C	118
1170	8.0-18C	R2	G14	B46	G	8.0-18C-R2	limited	pH8.0	T.plus3C	183
1171	8.0-18C	R2	G14	B46	G	8.0-18C-R2	limited	pH8.0	T.plus3C	125
1172	8.0-18C	R2	G14	B46	G	8.0-18C-R2	limited	pH8.0	T.plus3C	118
1173	8.0-18C	R2	G14	B46	G	8.0-18C-R2	limited	pH8.0	T.plus3C	86
1174	8.0-18C	R2	G14	B46	G	8.0-18C-R2	limited	pH8.0	T.plus3C	155
1175	8.0-18C	R2	G14	B46	G	8.0-18C-R2	limited	pH8.0	T.plus3C	155
1176	8.0-18C	R2	G14	B46	G	8.0-18C-R2	limited	pH8.0	T.plus3C	115
1177	8.0-18C	R2	G14	B46	G	8.0-18C-R2	limited	pH8.0	T.plus3C	118
1178	8.0-18C	R2	G14	B46	G	8.0-18C-R2	limited	pH8.0	T.plus3C	156
1179	8.0-18C	R2	G14	B46	G	8.0-18C-R2	limited	pH8.0	T.plus3C	125
1180	8.0-18C	R2	G14	B46	G	8.0-18C-R2	limited	pH8.0	T.plus3C	115
1181	8.0-18C	R2	G14	B46	G	8.0-18C-R2	limited	pH8.0	T.plus3C	65
1182	8.0-18C	R2	G14	B46	G	8.0-18C-R2	limited	pH8.0	T.plus3C	87
1183	8.0-18C	R2	G14	B46	G	8.0-18C-R2	limited	pH8.0	T.plus3C	84
1184	8.0-18C	R2	G14	B46	G	8.0-18C-R2	limited	pH8.0	T.plus3C	91
1185	8.0-18C	R3	G15	B42	H	8.0-18C-R3	limited	pH8.0	T.plus3C	159
1186	8.0-18C	R3	G15	B42	H	8.0-18C-R3	limited	pH8.0	T.plus3C	118
1187	8.0-18C	R3	G15	B42	H	8.0-18C-R3	limited	pH8.0	T.plus3C	171
1188	8.0-18C	R3	G15	B42	H	8.0-18C-R3	limited	pH8.0	T.plus3C	157
1189	8.0-18C	R3	G15	B42	H	8.0-18C-R3	limited	pH8.0	T.plus3C	174
1190	8.0-18C	R3	G15	B42	H	8.0-18C-R3	limited	pH8.0	T.plus3C	155
1191	8.0-18C	R3	G15	B42	H	8.0-18C-R3	limited	pH8.0	T.plus3C	165
1192	8.0-18C	R3	G15	B42	H	8.0-18C-R3	limited	pH8.0	T.plus3C	146
1193	8.0-18C	R3	G15	B42	H	8.0-18C-R3	limited	pH8.0	T.plus3C	157
1194	8.0-18C	R3	G15	B42	H	8.0-18C-R3	limited	pH8.0	T.plus3C	83
1195	8.0-18C	R3	G15	B42	H	8.0-18C-R3	limited	pH8.0	T.plus3C	111
1196	8.0-18C	R3	G15	B42	H	8.0-18C-R3	limited	pH8.0	T.plus3C	68
1197	8.0-18C	R3	G15	B42	H	8.0-18C-R3	limited	pH8.0	T.plus3C	111
1198	8.0-18C	R3	G15	B42	H	8.0-18C-R3	limited	pH8.0	T.plus3C	77
1199	8.0-18C	R3	G15	B42	H	8.0-18C-R3	limited	pH8.0	T.plus3C	83
1200	8.0-18C	R3	G15	B42	H	8.0-18C-R3	limited	pH8.0	T.plus3C	87
1201	8.0-18C	R3	G15	B42	H	8.0-18C-R3	limited	pH8.0	T.plus3C	131
1202	8.0-18C	R3	G15	B42	H	8.0-18C-R3	limited	pH8.0	T.plus3C	102
1203	8.4-18C	R1	G16	B44	G	8.4-18C-R1	limited	pH8.4	T.plus3C	117
1204	8.4-18C	R1	G16	B44	G	8.4-18C-R1	limited	pH8.4	T.plus3C	135
1205	8.4-18C	R1	G16	B44	G	8.4-18C-R1	limited	pH8.4	T.plus3C	148
1206	8.4-18C	R1	G16	B44	G	8.4-18C-R1	limited	pH8.4	T.plus3C	139
1207	8.4-18C	R1	G16	B44	G	8.4-18C-R1	limited	pH8.4	T.plus3C	61
1208	8.4-18C	R1	G16	B44	G	8.4-18C-R1	limited	pH8.4	T.plus3C	40
1209	8.4-18C	R1	G16	B44	G	8.4-18C-R1	limited	pH8.4	T.plus3C	41
1210	8.4-18C	R1	G16	B44	G	8.4-18C-R1	limited	pH8.4	T.plus3C	77
1211	8.4-18C	R1	G16	B44	G	8.4-18C-R1	limited	pH8.4	T.plus3C	151
1212	8.4-18C	R1	G16	B44	G	8.4-18C-R1	limited	pH8.4	T.plus3C	89
1213	8.4-18C	R1	G16	B44	G	8.4-18C-R1	limited	pH8.4	T.plus3C	70
1214	8.4-18C	R1	G16	B44	G	8.4-18C-R1	limited	pH8.4	T.plus3C	32
1215	8.4-18C	R1	G16	B44	G	8.4-18C-R1	limited	pH8.4	T.plus3C	69
1216	8.4-18C	R2	G17	B47	G	8.4-18C-R2	limited	pH8.4	T.plus3C	124
1217	8.4-18C	R2	G17	B47	G	8.4-18C-R2	limited	pH8.4	T.plus3C	62
1218	8.4-18C	R2	G17	B47	G	8.4-18C-R2	limited	pH8.4	T.plus3C	81
1219	8.4-18C	R2	G17	B47	G	8.4-18C-R2	limited	pH8.4	T.plus3C	92
1220	8.4-18C	R2	G17	B47	G	8.4-18C-R2	limited	pH8.4	T.plus3C	82
1221	8.4-18C	R2	G17	B47	G	8.4-18C-R2	limited	pH8.4	T.plus3C	42
1222	8.4-18C	R2	G17	B47	G	8.4-18C-R2	limited	pH8.4	T.plus3C	48
1223	8.4-18C	R2	G17	B47	G	8.4-18C-R2	limited	pH8.4	T.plus3C	76
1224	8.4-18C	R2	G17	B47	G	8.4-18C-R2	limited	pH8.4	T.plus3C	68
1225	8.4-18C	R2	G17	B47	G	8.4-18C-R2	limited	pH8.4	T.plus3C	95
1226	8.4-18C	R2	G17	B47	G	8.4-18C-R2	limited	pH8.4	T.plus3C	112
1227	8.4-18C	R2	G17	B47	G	8.4-18C-R2	limited	pH8.4	T.plus3C	42
1228	8.4-18C	R2	G17	B47	G	8.4-18C-R2	limited	pH8.4	T.plus3C	91
1229	8.4-18C	R2	G17	B47	G	8.4-18C-R2	limited	pH8.4	T.plus3C	162
1230	8.4-18C	R2	G17	B47	G	8.4-18C-R2	limited	pH8.4	T.plus3C	99
1231	8.4-18C	R2	G17	B47	G	8.4-18C-R2	limited	pH8.4	T.plus3C	97
1232	8.4-18C	R2	G17	B47	G	8.4-18C-R2	limited	pH8.4	T.plus3C	139
1233	8.4-18C	R3	G18	B43	H	8.4-18C-R3	limited	pH8.4	T.plus3C	162
1234	8.4-18C	R3	G18	B43	H	8.4-18C-R3	limited	pH8.4	T.plus3C	109
1235	8.4-18C	R3	G18	B43	H	8.4-18C-R3	limited	pH8.4	T.plus3C	59
1236	8.4-18C	R3	G18	B43	H	8.4-18C-R3	limited	pH8.4	T.plus3C	64
1237	8.4-18C	R3	G18	B43	H	8.4-18C-R3	limited	pH8.4	T.plus3C	146
1238	8.4-18C	R3	G18	B43	H	8.4-18C-R3	limited	pH8.4	T.plus3C	116
1239	8.4-18C	R3	G18	B43	H	8.4-18C-R3	limited	pH8.4	T.plus3C	88
1240	8.4-18C	R3	G18	B43	H	8.4-18C-R3	limited	pH8.4	T.plus3C	128
1241	8.4-18C	R3	G18	B43	H	8.4-18C-R3	limited	pH8.4	T.plus3C	123
1242	8.4-18C	R3	G18	B43	H	8.4-18C-R3	limited	pH8.4	T.plus3C	126
1243	8.4-18C	R3	G18	B43	H	8.4-18C-R3	limited	pH8.4	T.plus3C	125
1244	8.4-18C	R3	G18	B43	H	8.4-18C-R3	limited	pH8.4	T.plus3C	127
1245	8.4-18C	R3	G18	B43	H	8.4-18C-R3	limited	pH8.4	T.plus3C	142
1246	8.4-18C	R3	G18	B43	H	8.4-18C-R3	limited	pH8.4	T.plus3C	102
1247	8.4-18C	R3	G18	B43	H	8.4-18C-R3	limited	pH8.4	T.plus3C	129
1248	8.4-18C	R3	G18	B43	H	8.4-18C-R3	limited	pH8.4	T.plus3C	194
1249	8.4-18C	R3	G18	B43	H	8.4-18C-R3	limited	pH8.4	T.plus3C	187
1250	8.4-18C	R3	G18	B43	H	8.4-18C-R3	limited	pH8.4	T.plus3C	192
1251	7.6-15C	R4	H1	B7	H	7.6-15C-R4	limited	pH7.6	T.ambient	122
1252	7.6-15C	R4	H1	B7	H	7.6-15C-R4	limited	pH7.6	T.ambient	193
1253	7.6-15C	R4	H1	B7	H	7.6-15C-R4	limited	pH7.6	T.ambient	199
1254	7.6-15C	R4	H1	B7	H	7.6-15C-R4	limited	pH7.6	T.ambient	193
1255	7.6-15C	R4	H1	B7	H	7.6-15C-R4	limited	pH7.6	T.ambient	192
1256	7.6-15C	R4	H1	B7	H	7.6-15C-R4	limited	pH7.6	T.ambient	195
1257	7.6-15C	R4	H1	B7	H	7.6-15C-R4	limited	pH7.6	T.ambient	122
1258	7.6-15C	R4	H1	B7	H	7.6-15C-R4	limited	pH7.6	T.ambient	166
1259	7.6-15C	R4	H1	B7	H	7.6-15C-R4	limited	pH7.6	T.ambient	205
1260	7.6-15C	R4	H1	B7	H	7.6-15C-R4	limited	pH7.6	T.ambient	116
1261	7.6-15C	R4	H1	B7	H	7.6-15C-R4	limited	pH7.6	T.ambient	223
1262	7.6-15C	R4	H1	B7	H	7.6-15C-R4	limited	pH7.6	T.ambient	258
1263	7.6-15C	R4	H1	B7	H	7.6-15C-R4	limited	pH7.6	T.ambient	121
1264	7.6-15C	R4	H1	B7	H	7.6-15C-R4	limited	pH7.6	T.ambient	240
1265	7.6-15C	R4	H1	B7	H	7.6-15C-R4	limited	pH7.6	T.ambient	284
1266	7.6-15C	R4	H1	B7	H	7.6-15C-R4	limited	pH7.6	T.ambient	302
1267	7.6-15C	R4	H1	B7	H	7.6-15C-R4	limited	pH7.6	T.ambient	290
1268	7.6-15C	R4	H1	B7	H	7.6-15C-R4	limited	pH7.6	T.ambient	335
1269	7.6-15C	R4	H1	B7	H	7.6-15C-R4	limited	pH7.6	T.ambient	221
1270	7.6-15C	R4	H1	B7	H	7.6-15C-R4	limited	pH7.6	T.ambient	433
1271	7.6-15C	R4	H1	B7	H	7.6-15C-R4	limited	pH7.6	T.ambient	452
1272	7.6-15C	R4	H1	B7	H	7.6-15C-R4	limited	pH7.6	T.ambient	279
1273	7.6-15C	R4	H1	B7	H	7.6-15C-R4	limited	pH7.6	T.ambient	362
1274	7.6-15C	R4	H1	B7	H	7.6-15C-R4	limited	pH7.6	T.ambient	362
1275	7.6-15C	R4	H1	B7	H	7.6-15C-R4	limited	pH7.6	T.ambient	322
1276	7.6-15C	R4	H1	B7	H	7.6-15C-R4	limited	pH7.6	T.ambient	560
1277	7.6-15C	R5	H2	B2	I	7.6-15C-R5	limited	pH7.6	T.ambient	200
1278	7.6-15C	R5	H2	B2	I	7.6-15C-R5	limited	pH7.6	T.ambient	165
1279	7.6-15C	R5	H2	B2	I	7.6-15C-R5	limited	pH7.6	T.ambient	122
1280	7.6-15C	R5	H2	B2	I	7.6-15C-R5	limited	pH7.6	T.ambient	168
1281	7.6-15C	R5	H2	B2	I	7.6-15C-R5	limited	pH7.6	T.ambient	141
1282	7.6-15C	R5	H2	B2	I	7.6-15C-R5	limited	pH7.6	T.ambient	113
1283	7.6-15C	R5	H2	B2	I	7.6-15C-R5	limited	pH7.6	T.ambient	104
1284	7.6-15C	R5	H2	B2	I	7.6-15C-R5	limited	pH7.6	T.ambient	110
1285	7.6-15C	R5	H2	B2	I	7.6-15C-R5	limited	pH7.6	T.ambient	115
1286	7.6-15C	R5	H2	B2	I	7.6-15C-R5	limited	pH7.6	T.ambient	145
1287	7.6-15C	R5	H2	B2	I	7.6-15C-R5	limited	pH7.6	T.ambient	140
1288	7.6-15C	R5	H2	B2	I	7.6-15C-R5	limited	pH7.6	T.ambient	188
1289	7.6-15C	R5	H2	B2	I	7.6-15C-R5	limited	pH7.6	T.ambient	216
1290	7.6-15C	R5	H2	B2	I	7.6-15C-R5	limited	pH7.6	T.ambient	186
1291	7.6-15C	R5	H2	B2	I	7.6-15C-R5	limited	pH7.6	T.ambient	231
1292	7.6-15C	R5	H2	B2	I	7.6-15C-R5	limited	pH7.6	T.ambient	276
1293	7.6-15C	R5	H2	B2	I	7.6-15C-R5	limited	pH7.6	T.ambient	343
1294	7.6-15C	R5	H2	B2	I	7.6-15C-R5	limited	pH7.6	T.ambient	142
1295	7.6-15C	R5	H2	B2	I	7.6-15C-R5	limited	pH7.6	T.ambient	426
1296	7.6-15C	R5	H2	B2	I	7.6-15C-R5	limited	pH7.6	T.ambient	286
1297	7.6-15C	R5	H2	B2	I	7.6-15C-R5	limited	pH7.6	T.ambient	281
1298	7.6-15C	R5	H2	B2	I	7.6-15C-R5	limited	pH7.6	T.ambient	231
1299	7.6-15C	R5	H2	B2	I	7.6-15C-R5	limited	pH7.6	T.ambient	436
1300	7.6-15C	R5	H2	B2	I	7.6-15C-R5	limited	pH7.6	T.ambient	433
1301	7.6-15C	R5	H2	B2	I	7.6-15C-R5	limited	pH7.6	T.ambient	542
1302	7.6-15C	R5	H2	B2	I	7.6-15C-R5	limited	pH7.6	T.ambient	485
1303	7.6-15C	R5	H2	B2	I	7.6-15C-R5	limited	pH7.6	T.ambient	519
1304	8.0-15C	R4	H3	B5	H	8.0-15C-R4	limited	pH8.0	T.ambient	139
1305	8.0-15C	R4	H3	B5	H	8.0-15C-R4	limited	pH8.0	T.ambient	192
1306	8.0-15C	R4	H3	B5	H	8.0-15C-R4	limited	pH8.0	T.ambient	128
1307	8.0-15C	R4	H3	B5	H	8.0-15C-R4	limited	pH8.0	T.ambient	130
1308	8.0-15C	R4	H3	B5	H	8.0-15C-R4	limited	pH8.0	T.ambient	108
1309	8.0-15C	R4	H3	B5	H	8.0-15C-R4	limited	pH8.0	T.ambient	116
1310	8.0-15C	R4	H3	B5	H	8.0-15C-R4	limited	pH8.0	T.ambient	126
1311	8.0-15C	R4	H3	B5	H	8.0-15C-R4	limited	pH8.0	T.ambient	98
1312	8.0-15C	R4	H3	B5	H	8.0-15C-R4	limited	pH8.0	T.ambient	132
1313	8.0-15C	R4	H3	B5	H	8.0-15C-R4	limited	pH8.0	T.ambient	130
1314	8.0-15C	R4	H3	B5	H	8.0-15C-R4	limited	pH8.0	T.ambient	221
1315	8.0-15C	R4	H3	B5	H	8.0-15C-R4	limited	pH8.0	T.ambient	297
1316	8.0-15C	R4	H3	B5	H	8.0-15C-R4	limited	pH8.0	T.ambient	194
1317	8.0-15C	R4	H3	B5	H	8.0-15C-R4	limited	pH8.0	T.ambient	242
1318	8.0-15C	R4	H3	B5	H	8.0-15C-R4	limited	pH8.0	T.ambient	211
1319	8.0-15C	R4	H3	B5	H	8.0-15C-R4	limited	pH8.0	T.ambient	305
1320	8.0-15C	R4	H3	B5	H	8.0-15C-R4	limited	pH8.0	T.ambient	231
1321	8.0-15C	R4	H3	B5	H	8.0-15C-R4	limited	pH8.0	T.ambient	221
1322	8.0-15C	R4	H3	B5	H	8.0-15C-R4	limited	pH8.0	T.ambient	268
1323	8.0-15C	R4	H3	B5	H	8.0-15C-R4	limited	pH8.0	T.ambient	244
1324	8.0-15C	R4	H3	B5	H	8.0-15C-R4	limited	pH8.0	T.ambient	341
1325	8.0-15C	R4	H3	B5	H	8.0-15C-R4	limited	pH8.0	T.ambient	196
1326	8.0-15C	R4	H3	B5	H	8.0-15C-R4	limited	pH8.0	T.ambient	172
1327	8.0-15C	R4	H3	B5	H	8.0-15C-R4	limited	pH8.0	T.ambient	148
1328	8.0-15C	R4	H3	B5	H	8.0-15C-R4	limited	pH8.0	T.ambient	220
1329	8.0-15C	R5	H4	B3	I	8.0-15C-R5	limited	pH8.0	T.ambient	105
1330	8.0-15C	R5	H4	B3	I	8.0-15C-R5	limited	pH8.0	T.ambient	118
1331	8.0-15C	R5	H4	B3	I	8.0-15C-R5	limited	pH8.0	T.ambient	104
1332	8.0-15C	R5	H4	B3	I	8.0-15C-R5	limited	pH8.0	T.ambient	293
1333	8.0-15C	R5	H4	B3	I	8.0-15C-R5	limited	pH8.0	T.ambient	233
1334	8.0-15C	R5	H4	B3	I	8.0-15C-R5	limited	pH8.0	T.ambient	264
1335	8.0-15C	R5	H4	B3	I	8.0-15C-R5	limited	pH8.0	T.ambient	305
1336	8.0-15C	R5	H4	B3	I	8.0-15C-R5	limited	pH8.0	T.ambient	249
1337	8.0-15C	R5	H4	B3	I	8.0-15C-R5	limited	pH8.0	T.ambient	106
1338	8.0-15C	R5	H4	B3	I	8.0-15C-R5	limited	pH8.0	T.ambient	263
1339	8.0-15C	R5	H4	B3	I	8.0-15C-R5	limited	pH8.0	T.ambient	221
1340	8.0-15C	R5	H4	B3	I	8.0-15C-R5	limited	pH8.0	T.ambient	179
1341	8.0-15C	R5	H4	B3	I	8.0-15C-R5	limited	pH8.0	T.ambient	346
1342	8.0-15C	R5	H4	B3	I	8.0-15C-R5	limited	pH8.0	T.ambient	389
1343	8.0-15C	R5	H4	B3	I	8.0-15C-R5	limited	pH8.0	T.ambient	372
1344	8.4-15C	R4	H5	B6	H	8.4-15C-R4	limited	pH8.4	T.ambient	146
1345	8.4-15C	R4	H5	B6	H	8.4-15C-R4	limited	pH8.4	T.ambient	137
1346	8.4-15C	R4	H5	B6	H	8.4-15C-R4	limited	pH8.4	T.ambient	196
1347	8.4-15C	R4	H5	B6	H	8.4-15C-R4	limited	pH8.4	T.ambient	160
1348	8.4-15C	R4	H5	B6	H	8.4-15C-R4	limited	pH8.4	T.ambient	153
1349	8.4-15C	R4	H5	B6	H	8.4-15C-R4	limited	pH8.4	T.ambient	133
1350	8.4-15C	R4	H5	B6	H	8.4-15C-R4	limited	pH8.4	T.ambient	86
1351	8.4-15C	R4	H5	B6	H	8.4-15C-R4	limited	pH8.4	T.ambient	118
1352	8.4-15C	R4	H5	B6	H	8.4-15C-R4	limited	pH8.4	T.ambient	64
1353	8.4-15C	R4	H5	B6	H	8.4-15C-R4	limited	pH8.4	T.ambient	94
1354	8.4-15C	R4	H5	B6	H	8.4-15C-R4	limited	pH8.4	T.ambient	74
1355	8.4-15C	R4	H5	B6	H	8.4-15C-R4	limited	pH8.4	T.ambient	210
1356	8.4-15C	R4	H5	B6	H	8.4-15C-R4	limited	pH8.4	T.ambient	113
1357	8.4-15C	R4	H5	B6	H	8.4-15C-R4	limited	pH8.4	T.ambient	166
1358	8.4-15C	R4	H5	B6	H	8.4-15C-R4	limited	pH8.4	T.ambient	208
1359	8.4-15C	R4	H5	B6	H	8.4-15C-R4	limited	pH8.4	T.ambient	89
1360	8.4-15C	R4	H5	B6	H	8.4-15C-R4	limited	pH8.4	T.ambient	237
1361	8.4-15C	R4	H5	B6	H	8.4-15C-R4	limited	pH8.4	T.ambient	296
1362	8.4-15C	R4	H5	B6	H	8.4-15C-R4	limited	pH8.4	T.ambient	155
1363	8.4-15C	R4	H5	B6	H	8.4-15C-R4	limited	pH8.4	T.ambient	280
1364	8.4-15C	R4	H5	B6	H	8.4-15C-R4	limited	pH8.4	T.ambient	211
1365	8.4-15C	R4	H5	B6	H	8.4-15C-R4	limited	pH8.4	T.ambient	197
1366	8.4-15C	R5	H6	B4	I	8.4-15C-R5	limited	pH8.4	T.ambient	142
1367	8.4-15C	R5	H6	B4	I	8.4-15C-R5	limited	pH8.4	T.ambient	130
1368	8.4-15C	R5	H6	B4	I	8.4-15C-R5	limited	pH8.4	T.ambient	120
1369	8.4-15C	R5	H6	B4	I	8.4-15C-R5	limited	pH8.4	T.ambient	102
1370	8.4-15C	R5	H6	B4	I	8.4-15C-R5	limited	pH8.4	T.ambient	127
1371	8.4-15C	R5	H6	B4	I	8.4-15C-R5	limited	pH8.4	T.ambient	95
1372	8.4-15C	R5	H6	B4	I	8.4-15C-R5	limited	pH8.4	T.ambient	119
1373	8.4-15C	R5	H6	B4	I	8.4-15C-R5	limited	pH8.4	T.ambient	84
1374	8.4-15C	R5	H6	B4	I	8.4-15C-R5	limited	pH8.4	T.ambient	121
1375	8.4-15C	R5	H6	B4	I	8.4-15C-R5	limited	pH8.4	T.ambient	107
1376	8.4-15C	R5	H6	B4	I	8.4-15C-R5	limited	pH8.4	T.ambient	120
1377	8.4-15C	R5	H6	B4	I	8.4-15C-R5	limited	pH8.4	T.ambient	97
1378	8.4-15C	R5	H6	B4	I	8.4-15C-R5	limited	pH8.4	T.ambient	147
1379	8.4-15C	R5	H6	B4	I	8.4-15C-R5	limited	pH8.4	T.ambient	123
1380	8.4-15C	R5	H6	B4	I	8.4-15C-R5	limited	pH8.4	T.ambient	119
1381	8.4-15C	R5	H6	B4	I	8.4-15C-R5	limited	pH8.4	T.ambient	111
1382	8.4-15C	R5	H6	B4	I	8.4-15C-R5	limited	pH8.4	T.ambient	126
1383	8.4-15C	R5	H6	B4	I	8.4-15C-R5	limited	pH8.4	T.ambient	115
1384	8.4-15C	R5	H6	B4	I	8.4-15C-R5	limited	pH8.4	T.ambient	132
1385	8.4-15C	R5	H6	B4	I	8.4-15C-R5	limited	pH8.4	T.ambient	239
1386	8.4-15C	R5	H6	B4	I	8.4-15C-R5	limited	pH8.4	T.ambient	71
1387	8.4-15C	R5	H6	B4	I	8.4-15C-R5	limited	pH8.4	T.ambient	113
1388	8.4-15C	R5	H6	B4	I	8.4-15C-R5	limited	pH8.4	T.ambient	188
1389	8.4-15C	R5	H6	B4	I	8.4-15C-R5	limited	pH8.4	T.ambient	181
1390	8.4-15C	R5	H6	B4	I	8.4-15C-R5	limited	pH8.4	T.ambient	306
1391	7.6-18C	R4	H7	B47	H	7.6-18C-R4	limited	pH7.6	T.plus3C	244
1392	7.6-18C	R4	H7	B47	H	7.6-18C-R4	limited	pH7.6	T.plus3C	288
1393	7.6-18C	R4	H7	B47	H	7.6-18C-R4	limited	pH7.6	T.plus3C	367
1394	7.6-18C	R4	H7	B47	H	7.6-18C-R4	limited	pH7.6	T.plus3C	126
1395	7.6-18C	R4	H7	B47	H	7.6-18C-R4	limited	pH7.6	T.plus3C	265
1396	7.6-18C	R4	H7	B47	H	7.6-18C-R4	limited	pH7.6	T.plus3C	241
1397	7.6-18C	R4	H7	B47	H	7.6-18C-R4	limited	pH7.6	T.plus3C	162
1398	7.6-18C	R4	H7	B47	H	7.6-18C-R4	limited	pH7.6	T.plus3C	330
1399	7.6-18C	R4	H7	B47	H	7.6-18C-R4	limited	pH7.6	T.plus3C	165
1400	7.6-18C	R4	H7	B47	H	7.6-18C-R4	limited	pH7.6	T.plus3C	221
1401	7.6-18C	R4	H7	B47	H	7.6-18C-R4	limited	pH7.6	T.plus3C	336
1402	7.6-18C	R4	H7	B47	H	7.6-18C-R4	limited	pH7.6	T.plus3C	204
1403	7.6-18C	R4	H7	B47	H	7.6-18C-R4	limited	pH7.6	T.plus3C	217
1404	7.6-18C	R4	H7	B47	H	7.6-18C-R4	limited	pH7.6	T.plus3C	210
1405	7.6-18C	R5	H8	B42	I	7.6-18C-R5	limited	pH7.6	T.plus3C	256
1406	7.6-18C	R5	H8	B42	I	7.6-18C-R5	limited	pH7.6	T.plus3C	139
1407	7.6-18C	R5	H8	B42	I	7.6-18C-R5	limited	pH7.6	T.plus3C	291
1408	7.6-18C	R5	H8	B42	I	7.6-18C-R5	limited	pH7.6	T.plus3C	299
1409	7.6-18C	R5	H8	B42	I	7.6-18C-R5	limited	pH7.6	T.plus3C	320
1410	7.6-18C	R5	H8	B42	I	7.6-18C-R5	limited	pH7.6	T.plus3C	324
1411	7.6-18C	R5	H8	B42	I	7.6-18C-R5	limited	pH7.6	T.plus3C	211
1412	7.6-18C	R5	H8	B42	I	7.6-18C-R5	limited	pH7.6	T.plus3C	239
1413	7.6-18C	R5	H8	B42	I	7.6-18C-R5	limited	pH7.6	T.plus3C	275
1414	7.6-18C	R5	H8	B42	I	7.6-18C-R5	limited	pH7.6	T.plus3C	229
1415	7.6-18C	R5	H8	B42	I	7.6-18C-R5	limited	pH7.6	T.plus3C	247
1416	7.6-18C	R5	H8	B42	I	7.6-18C-R5	limited	pH7.6	T.plus3C	289
1417	7.6-18C	R5	H8	B42	I	7.6-18C-R5	limited	pH7.6	T.plus3C	279
1418	7.6-18C	R5	H8	B42	I	7.6-18C-R5	limited	pH7.6	T.plus3C	264
1419	7.6-18C	R5	H8	B42	I	7.6-18C-R5	limited	pH7.6	T.plus3C	247
1420	8.0-18C	R4	H9	B45	H	8.0-18C-R4	limited	pH8.0	T.plus3C	282
1421	8.0-18C	R4	H9	B45	H	8.0-18C-R4	limited	pH8.0	T.plus3C	210
1422	8.0-18C	R4	H9	B45	H	8.0-18C-R4	limited	pH8.0	T.plus3C	305
1423	8.0-18C	R4	H9	B45	H	8.0-18C-R4	limited	pH8.0	T.plus3C	258
1424	8.0-18C	R4	H9	B45	H	8.0-18C-R4	limited	pH8.0	T.plus3C	279
1425	8.0-18C	R4	H9	B45	H	8.0-18C-R4	limited	pH8.0	T.plus3C	205
1426	8.0-18C	R4	H9	B45	H	8.0-18C-R4	limited	pH8.0	T.plus3C	181
1427	8.0-18C	R4	H9	B45	H	8.0-18C-R4	limited	pH8.0	T.plus3C	218
1428	8.0-18C	R4	H9	B45	H	8.0-18C-R4	limited	pH8.0	T.plus3C	250
1429	8.0-18C	R4	H9	B45	H	8.0-18C-R4	limited	pH8.0	T.plus3C	203
1430	8.0-18C	R4	H9	B45	H	8.0-18C-R4	limited	pH8.0	T.plus3C	269
1431	8.0-18C	R4	H9	B45	H	8.0-18C-R4	limited	pH8.0	T.plus3C	107
1432	8.0-18C	R4	H9	B45	H	8.0-18C-R4	limited	pH8.0	T.plus3C	222
1433	8.0-18C	R4	H9	B45	H	8.0-18C-R4	limited	pH8.0	T.plus3C	119
1434	8.0-18C	R4	H9	B45	H	8.0-18C-R4	limited	pH8.0	T.plus3C	213
1435	8.0-18C	R5	H10	B43	I	8.0-18C-R5	limited	pH8.0	T.plus3C	339
1436	8.0-18C	R5	H10	B43	I	8.0-18C-R5	limited	pH8.0	T.plus3C	312
1437	8.0-18C	R5	H10	B43	I	8.0-18C-R5	limited	pH8.0	T.plus3C	197
1438	8.0-18C	R5	H10	B43	I	8.0-18C-R5	limited	pH8.0	T.plus3C	226
1439	8.0-18C	R5	H10	B43	I	8.0-18C-R5	limited	pH8.0	T.plus3C	272
1440	8.0-18C	R5	H10	B43	I	8.0-18C-R5	limited	pH8.0	T.plus3C	175
1441	8.0-18C	R5	H10	B43	I	8.0-18C-R5	limited	pH8.0	T.plus3C	269
1442	8.0-18C	R5	H10	B43	I	8.0-18C-R5	limited	pH8.0	T.plus3C	149
1443	8.0-18C	R5	H10	B43	I	8.0-18C-R5	limited	pH8.0	T.plus3C	248
1444	8.0-18C	R5	H10	B43	I	8.0-18C-R5	limited	pH8.0	T.plus3C	143
1445	8.0-18C	R5	H10	B43	I	8.0-18C-R5	limited	pH8.0	T.plus3C	175
1446	8.0-18C	R5	H10	B43	I	8.0-18C-R5	limited	pH8.0	T.plus3C	236
1447	8.0-18C	R5	H10	B43	I	8.0-18C-R5	limited	pH8.0	T.plus3C	157
1448	8.0-18C	R5	H10	B43	I	8.0-18C-R5	limited	pH8.0	T.plus3C	296
1449	8.0-18C	R5	H10	B43	I	8.0-18C-R5	limited	pH8.0	T.plus3C	101
1450	8.0-18C	R5	H10	B43	I	8.0-18C-R5	limited	pH8.0	T.plus3C	323
1451	8.0-18C	R5	H10	B43	I	8.0-18C-R5	limited	pH8.0	T.plus3C	244
1452	8.0-18C	R5	H10	B43	I	8.0-18C-R5	limited	pH8.0	T.plus3C	332
1453	8.0-18C	R5	H10	B43	I	8.0-18C-R5	limited	pH8.0	T.plus3C	215
1454	8.4-18C	R4	H11	B46	H	8.4-18C-R4	limited	pH8.4	T.plus3C	125
1455	8.4-18C	R4	H11	B46	H	8.4-18C-R4	limited	pH8.4	T.plus3C	174
1456	8.4-18C	R4	H11	B46	H	8.4-18C-R4	limited	pH8.4	T.plus3C	155
1457	8.4-18C	R4	H11	B46	H	8.4-18C-R4	limited	pH8.4	T.plus3C	220
1458	8.4-18C	R4	H11	B46	H	8.4-18C-R4	limited	pH8.4	T.plus3C	169
1459	8.4-18C	R4	H11	B46	H	8.4-18C-R4	limited	pH8.4	T.plus3C	151
1460	8.4-18C	R4	H11	B46	H	8.4-18C-R4	limited	pH8.4	T.plus3C	103
1461	8.4-18C	R4	H11	B46	H	8.4-18C-R4	limited	pH8.4	T.plus3C	193
1462	8.4-18C	R4	H11	B46	H	8.4-18C-R4	limited	pH8.4	T.plus3C	239
1463	8.4-18C	R4	H11	B46	H	8.4-18C-R4	limited	pH8.4	T.plus3C	135
1464	8.4-18C	R4	H11	B46	H	8.4-18C-R4	limited	pH8.4	T.plus3C	122
1465	8.4-18C	R4	H11	B46	H	8.4-18C-R4	limited	pH8.4	T.plus3C	210
1466	8.4-18C	R4	H11	B46	H	8.4-18C-R4	limited	pH8.4	T.plus3C	100
1467	8.4-18C	R4	H11	B46	H	8.4-18C-R4	limited	pH8.4	T.plus3C	182
1468	8.4-18C	R5	H12	B44	I	8.4-18C-R5	limited	pH8.0	T.plus3C	98
1469	8.4-18C	R5	H12	B44	I	8.4-18C-R5	limited	pH8.0	T.plus3C	184
1470	8.4-18C	R5	H12	B44	I	8.4-18C-R5	limited	pH8.0	T.plus3C	157
1471	8.4-18C	R5	H12	B44	I	8.4-18C-R5	limited	pH8.0	T.plus3C	96
1472	8.4-18C	R5	H12	B44	I	8.4-18C-R5	limited	pH8.0	T.plus3C	179
1473	8.4-18C	R5	H12	B44	I	8.4-18C-R5	limited	pH8.0	T.plus3C	193
1474	8.4-18C	R5	H12	B44	I	8.4-18C-R5	limited	pH8.0	T.plus3C	283
1475	8.4-18C	R5	H12	B44	I	8.4-18C-R5	limited	pH8.0	T.plus3C	203
1476	8.4-18C	R5	H12	B44	I	8.4-18C-R5	limited	pH8.0	T.plus3C	161
1477	8.4-18C	R5	H12	B44	I	8.4-18C-R5	limited	pH8.0	T.plus3C	273
1478	8.4-18C	R5	H12	B44	I	8.4-18C-R5	limited	pH8.0	T.plus3C	211
1479	8.4-18C	R5	H12	B44	I	8.4-18C-R5	limited	pH8.0	T.plus3C	98
1480	8.4-18C	R5	H12	B44	I	8.4-18C-R5	limited	pH8.0	T.plus3C	71
1481	7.6-15C	R6	I3	B5	I	7.6-15C-R6	limited	pH7.6	T.ambient	118
1482	7.6-15C	R6	I3	B5	I	7.6-15C-R6	limited	pH7.6	T.ambient	455
1483	7.6-15C	R6	I3	B5	I	7.6-15C-R6	limited	pH7.6	T.ambient	141
1484	7.6-15C	R6	I3	B5	I	7.6-15C-R6	limited	pH7.6	T.ambient	151
1485	7.6-15C	R6	I3	B5	I	7.6-15C-R6	limited	pH7.6	T.ambient	438
1486	7.6-15C	R6	I3	B5	I	7.6-15C-R6	limited	pH7.6	T.ambient	157
1487	7.6-15C	R6	I3	B5	I	7.6-15C-R6	limited	pH7.6	T.ambient	160
1488	7.6-15C	R6	I3	B5	I	7.6-15C-R6	limited	pH7.6	T.ambient	161
1489	7.6-15C	R6	I3	B5	I	7.6-15C-R6	limited	pH7.6	T.ambient	120
1490	7.6-15C	R6	I3	B5	I	7.6-15C-R6	limited	pH7.6	T.ambient	196
1491	7.6-15C	R6	I3	B5	I	7.6-15C-R6	limited	pH7.6	T.ambient	202
1492	7.6-15C	R6	I3	B5	I	7.6-15C-R6	limited	pH7.6	T.ambient	209
1493	7.6-15C	R6	I3	B5	I	7.6-15C-R6	limited	pH7.6	T.ambient	176
1494	7.6-15C	R6	I3	B5	I	7.6-15C-R6	limited	pH7.6	T.ambient	233
1495	7.6-15C	R6	I3	B5	I	7.6-15C-R6	limited	pH7.6	T.ambient	263
1496	7.6-15C	R6	I3	B5	I	7.6-15C-R6	limited	pH7.6	T.ambient	257
1497	7.6-15C	R6	I3	B5	I	7.6-15C-R6	limited	pH7.6	T.ambient	223
1498	7.6-15C	R6	I3	B5	I	7.6-15C-R6	limited	pH7.6	T.ambient	260
1499	7.6-15C	R6	I3	B5	I	7.6-15C-R6	limited	pH7.6	T.ambient	272
1500	7.6-15C	R6	I3	B5	I	7.6-15C-R6	limited	pH7.6	T.ambient	366
1501	7.6-15C	R6	I3	B5	I	7.6-15C-R6	limited	pH7.6	T.ambient	370
1502	7.6-15C	R6	I3	B5	I	7.6-15C-R6	limited	pH7.6	T.ambient	185
1503	7.6-15C	R6	I3	B5	I	7.6-15C-R6	limited	pH7.6	T.ambient	380
1504	7.6-15C	R6	I3	B5	I	7.6-15C-R6	limited	pH7.6	T.ambient	324
1505	8.0-15C	R6	I1	B6	I	8.0-15C-R6	limited	pH8.0	T.ambient	111
1506	8.0-15C	R6	I1	B6	I	8.0-15C-R6	limited	pH8.0	T.ambient	142
1507	8.0-15C	R6	I1	B6	I	8.0-15C-R6	limited	pH8.0	T.ambient	220
1508	8.0-15C	R6	I1	B6	I	8.0-15C-R6	limited	pH8.0	T.ambient	233
1509	8.0-15C	R6	I1	B6	I	8.0-15C-R6	limited	pH8.0	T.ambient	73
1510	8.0-15C	R6	I1	B6	I	8.0-15C-R6	limited	pH8.0	T.ambient	190
1511	8.0-15C	R6	I1	B6	I	8.0-15C-R6	limited	pH8.0	T.ambient	99
1512	8.0-15C	R6	I1	B6	I	8.0-15C-R6	limited	pH8.0	T.ambient	86
1513	8.0-15C	R6	I1	B6	I	8.0-15C-R6	limited	pH8.0	T.ambient	172
1514	8.0-15C	R6	I1	B6	I	8.0-15C-R6	limited	pH8.0	T.ambient	179
1515	8.0-15C	R6	I1	B6	I	8.0-15C-R6	limited	pH8.0	T.ambient	201
1516	8.0-15C	R6	I1	B6	I	8.0-15C-R6	limited	pH8.0	T.ambient	250
1517	8.0-15C	R6	I1	B6	I	8.0-15C-R6	limited	pH8.0	T.ambient	198
1518	8.0-15C	R6	I1	B6	I	8.0-15C-R6	limited	pH8.0	T.ambient	215
1519	8.0-15C	R6	I1	B6	I	8.0-15C-R6	limited	pH8.0	T.ambient	229
1520	8.0-15C	R6	I1	B6	I	8.0-15C-R6	limited	pH8.0	T.ambient	265
1521	8.0-15C	R6	I1	B6	I	8.0-15C-R6	limited	pH8.0	T.ambient	276
1522	8.0-15C	R6	I1	B6	I	8.0-15C-R6	limited	pH8.0	T.ambient	189
1523	8.0-15C	R6	I1	B6	I	8.0-15C-R6	limited	pH8.0	T.ambient	158
1524	8.0-15C	R6	I1	B6	I	8.0-15C-R6	limited	pH8.0	T.ambient	212
1525	8.0-15C	R6	I1	B6	I	8.0-15C-R6	limited	pH8.0	T.ambient	256
1526	8.0-15C	R6	I1	B6	I	8.0-15C-R6	limited	pH8.0	T.ambient	244
1527	8.4-15C	R6	I2	B7	I	8.4-15C-R6	limited	pH8.4	T.ambient	91
1528	8.4-15C	R6	I2	B7	I	8.4-15C-R6	limited	pH8.4	T.ambient	101
1529	8.4-15C	R6	I2	B7	I	8.4-15C-R6	limited	pH8.4	T.ambient	130
1530	8.4-15C	R6	I2	B7	I	8.4-15C-R6	limited	pH8.4	T.ambient	279
1531	8.4-15C	R6	I2	B7	I	8.4-15C-R6	limited	pH8.4	T.ambient	128
1532	8.4-15C	R6	I2	B7	I	8.4-15C-R6	limited	pH8.4	T.ambient	253
1533	8.4-15C	R6	I2	B7	I	8.4-15C-R6	limited	pH8.4	T.ambient	231
1534	8.4-15C	R6	I2	B7	I	8.4-15C-R6	limited	pH8.4	T.ambient	183
1535	8.4-15C	R6	I2	B7	I	8.4-15C-R6	limited	pH8.4	T.ambient	137
1536	8.4-15C	R6	I2	B7	I	8.4-15C-R6	limited	pH8.4	T.ambient	218
1537	8.4-15C	R6	I2	B7	I	8.4-15C-R6	limited	pH8.4	T.ambient	184
1538	8.4-15C	R6	I2	B7	I	8.4-15C-R6	limited	pH8.4	T.ambient	194
1539	8.4-15C	R6	I2	B7	I	8.4-15C-R6	limited	pH8.4	T.ambient	156
1540	8.4-15C	R6	I2	B7	I	8.4-15C-R6	limited	pH8.4	T.ambient	280
1541	8.4-15C	R6	I2	B7	I	8.4-15C-R6	limited	pH8.4	T.ambient	210
1542	8.4-15C	R6	I2	B7	I	8.4-15C-R6	limited	pH8.4	T.ambient	258
1543	8.4-15C	R6	I2	B7	I	8.4-15C-R6	limited	pH8.4	T.ambient	129
1544	8.4-15C	R6	I2	B7	I	8.4-15C-R6	limited	pH8.4	T.ambient	199
1545	8.4-15C	R6	I2	B7	I	8.4-15C-R6	limited	pH8.4	T.ambient	119
1546	8.4-15C	R6	I2	B7	I	8.4-15C-R6	limited	pH8.4	T.ambient	204
1547	8.4-15C	R6	I2	B7	I	8.4-15C-R6	limited	pH8.4	T.ambient	114
1548	8.4-15C	R6	I2	B7	I	8.4-15C-R6	limited	pH8.4	T.ambient	217
1549	8.4-15C	R6	I2	B7	I	8.4-15C-R6	limited	pH8.4	T.ambient	286
1550	7.6-18C	R6	I6	B45	I	7.6-18C-R6	limited	pH7.6	T.plus3C	249
1551	7.6-18C	R6	I6	B45	I	7.6-18C-R6	limited	pH7.6	T.plus3C	182
1552	7.6-18C	R6	I6	B45	I	7.6-18C-R6	limited	pH7.6	T.plus3C	243
1553	7.6-18C	R6	I6	B45	I	7.6-18C-R6	limited	pH7.6	T.plus3C	226
1554	7.6-18C	R6	I6	B45	I	7.6-18C-R6	limited	pH7.6	T.plus3C	206
1555	7.6-18C	R6	I6	B45	I	7.6-18C-R6	limited	pH7.6	T.plus3C	220
1556	7.6-18C	R6	I6	B45	I	7.6-18C-R6	limited	pH7.6	T.plus3C	167
1557	7.6-18C	R6	I6	B45	I	7.6-18C-R6	limited	pH7.6	T.plus3C	120
1558	7.6-18C	R6	I6	B45	I	7.6-18C-R6	limited	pH7.6	T.plus3C	216
1559	7.6-18C	R6	I6	B45	I	7.6-18C-R6	limited	pH7.6	T.plus3C	176
1560	7.6-18C	R6	I6	B45	I	7.6-18C-R6	limited	pH7.6	T.plus3C	241
1561	7.6-18C	R6	I6	B45	I	7.6-18C-R6	limited	pH7.6	T.plus3C	279
1562	7.6-18C	R6	I6	B45	I	7.6-18C-R6	limited	pH7.6	T.plus3C	197
1563	7.6-18C	R6	I6	B45	I	7.6-18C-R6	limited	pH7.6	T.plus3C	264
1564	7.6-18C	R6	I6	B45	I	7.6-18C-R6	limited	pH7.6	T.plus3C	275
1565	7.6-18C	R6	I6	B45	I	7.6-18C-R6	limited	pH7.6	T.plus3C	191
1566	7.6-18C	R6	I6	B45	I	7.6-18C-R6	limited	pH7.6	T.plus3C	188
1567	7.6-18C	R6	I6	B45	I	7.6-18C-R6	limited	pH7.6	T.plus3C	299
1568	8.0-18C	R6	I4	B46	I	8.0-18C-R6	limited	pH8.0	T.plus3C	171
1569	8.0-18C	R6	I4	B46	I	8.0-18C-R6	limited	pH8.0	T.plus3C	117
1570	8.0-18C	R6	I4	B46	I	8.0-18C-R6	limited	pH8.0	T.plus3C	132
1571	8.0-18C	R6	I4	B46	I	8.0-18C-R6	limited	pH8.0	T.plus3C	144
1572	8.0-18C	R6	I4	B46	I	8.0-18C-R6	limited	pH8.0	T.plus3C	92
1573	8.0-18C	R6	I4	B46	I	8.0-18C-R6	limited	pH8.0	T.plus3C	176
1574	8.0-18C	R6	I4	B46	I	8.0-18C-R6	limited	pH8.0	T.plus3C	183
1575	8.0-18C	R6	I4	B46	I	8.0-18C-R6	limited	pH8.0	T.plus3C	155
1576	8.0-18C	R6	I4	B46	I	8.0-18C-R6	limited	pH8.0	T.plus3C	200
1577	8.0-18C	R6	I4	B46	I	8.0-18C-R6	limited	pH8.0	T.plus3C	183
1578	8.0-18C	R6	I4	B46	I	8.0-18C-R6	limited	pH8.0	T.plus3C	205
1579	8.0-18C	R6	I4	B46	I	8.0-18C-R6	limited	pH8.0	T.plus3C	120
1580	8.0-18C	R6	I4	B46	I	8.0-18C-R6	limited	pH8.0	T.plus3C	211
1581	8.0-18C	R6	I4	B46	I	8.0-18C-R6	limited	pH8.0	T.plus3C	238
1582	8.0-18C	R6	I4	B46	I	8.0-18C-R6	limited	pH8.0	T.plus3C	165
1583	8.0-18C	R6	I4	B46	I	8.0-18C-R6	limited	pH8.0	T.plus3C	311
1584	8.0-18C	R6	I4	B46	I	8.0-18C-R6	limited	pH8.0	T.plus3C	322
1585	8.0-18C	R6	I4	B46	I	8.0-18C-R6	limited	pH8.0	T.plus3C	177
1586	8.0-18C	R6	I4	B46	I	8.0-18C-R6	limited	pH8.0	T.plus3C	156
1587	8.4-18C	R6	I5	B47	I	8.4-18C-R6	limited	pH8.4	T.plus3C	79
1588	8.4-18C	R6	I5	B47	I	8.4-18C-R6	limited	pH8.4	T.plus3C	119
1589	8.4-18C	R6	I5	B47	I	8.4-18C-R6	limited	pH8.4	T.plus3C	59
1590	8.4-18C	R6	I5	B47	I	8.4-18C-R6	limited	pH8.4	T.plus3C	83
1591	8.4-18C	R6	I5	B47	I	8.4-18C-R6	limited	pH8.4	T.plus3C	87
1592	8.4-18C	R6	I5	B47	I	8.4-18C-R6	limited	pH8.4	T.plus3C	135
1593	8.4-18C	R6	I5	B47	I	8.4-18C-R6	limited	pH8.4	T.plus3C	155
1594	8.4-18C	R6	I5	B47	I	8.4-18C-R6	limited	pH8.4	T.plus3C	121
1595	8.4-18C	R6	I5	B47	I	8.4-18C-R6	limited	pH8.4	T.plus3C	144
1596	8.4-18C	R6	I5	B47	I	8.4-18C-R6	limited	pH8.4	T.plus3C	150
1597	8.4-18C	R6	I5	B47	I	8.4-18C-R6	limited	pH8.4	T.plus3C	138
1598	8.4-18C	R6	I5	B47	I	8.4-18C-R6	limited	pH8.4	T.plus3C	111
1599	8.4-18C	R6	I5	B47	I	8.4-18C-R6	limited	pH8.4	T.plus3C	148
1600	8.4-18C	R6	I5	B47	I	8.4-18C-R6	limited	pH8.4	T.plus3C	179
1601	8.4-18C	R6	I5	B47	I	8.4-18C-R6	limited	pH8.4	T.plus3C	184
1602	8.4-18C	R6	I5	B47	I	8.4-18C-R6	limited	pH8.4	T.plus3C	161
1603	8.4-18C	R6	I5	B47	I	8.4-18C-R6	limited	pH8.4	T.plus3C	192
1604	8.0-15C	R3	E1	B3	E	8.0-15C-R3	crushed	pH8.0	T.ambient	300
1605	8.0-15C	R3	E1	B3	E	8.0-15C-R3	crushed	pH8.0	T.ambient	191
1606	8.0-15C	R3	E1	B3	E	8.0-15C-R3	crushed	pH8.0	T.ambient	262
1607	8.0-15C	R3	E1	B3	E	8.0-15C-R3	crushed	pH8.0	T.ambient	316
1608	8.0-15C	R3	E1	B3	E	8.0-15C-R3	crushed	pH8.0	T.ambient	334
1609	8.0-15C	R3	E1	B3	E	8.0-15C-R3	crushed	pH8.0	T.ambient	239
1610	8.0-15C	R3	E1	B3	E	8.0-15C-R3	crushed	pH8.0	T.ambient	387
1611	8.0-15C	R3	E1	B3	E	8.0-15C-R3	crushed	pH8.0	T.ambient	323
1612	8.0-15C	R3	E1	B3	E	8.0-15C-R3	crushed	pH8.0	T.ambient	273
1613	8.0-15C	R3	E1	B3	E	8.0-15C-R3	crushed	pH8.0	T.ambient	255
1614	8.0-15C	R3	E1	B3	E	8.0-15C-R3	crushed	pH8.0	T.ambient	379
1615	8.0-15C	R3	E1	B3	E	8.0-15C-R3	crushed	pH8.0	T.ambient	308
1616	8.0-15C	R3	E1	B3	E	8.0-15C-R3	crushed	pH8.0	T.ambient	330
1617	8.0-15C	R3	E1	B3	E	8.0-15C-R3	crushed	pH8.0	T.ambient	378
1618	8.0-15C	R3	E1	B3	E	8.0-15C-R3	crushed	pH8.0	T.ambient	247
1619	8.0-15C	R3	E1	B3	E	8.0-15C-R3	crushed	pH8.0	T.ambient	276
1620	8.0-15C	R3	E1	B3	E	8.0-15C-R3	crushed	pH8.0	T.ambient	312
1621	8.0-15C	R3	E1	B3	E	8.0-15C-R3	crushed	pH8.0	T.ambient	309
1622	8.0-15C	R3	E1	B3	E	8.0-15C-R3	crushed	pH8.0	T.ambient	477
1623	8.0-15C	R3	E1	B3	E	8.0-15C-R3	crushed	pH8.0	T.ambient	348
1624	8.0-15C	R3	E1	B3	E	8.0-15C-R3	crushed	pH8.0	T.ambient	264
1625	8.0-15C	R3	E1	B3	E	8.0-15C-R3	crushed	pH8.0	T.ambient	232
1626	8.0-15C	R3	E1	B3	E	8.0-15C-R3	crushed	pH8.0	T.ambient	215
1627	8.0-15C	R3	E1	B3	E	8.0-15C-R3	crushed	pH8.0	T.ambient	285
1628	8.0-15C	R3	E1	B3	E	8.0-15C-R3	crushed	pH8.0	T.ambient	294
1629	8.4-15C	R3	E2	B2	E	8.4-15C-R3	crushed	pH8.4	T.ambient	202
1630	8.4-15C	R3	E2	B2	E	8.4-15C-R3	crushed	pH8.4	T.ambient	164
1631	8.4-15C	R3	E2	B2	E	8.4-15C-R3	crushed	pH8.4	T.ambient	143
1632	8.4-15C	R3	E2	B2	E	8.4-15C-R3	crushed	pH8.4	T.ambient	149
1633	8.4-15C	R3	E2	B2	E	8.4-15C-R3	crushed	pH8.4	T.ambient	178
1634	8.4-15C	R3	E2	B2	E	8.4-15C-R3	crushed	pH8.4	T.ambient	195
1635	8.4-15C	R3	E2	B2	E	8.4-15C-R3	crushed	pH8.4	T.ambient	148
1636	8.4-15C	R3	E2	B2	E	8.4-15C-R3	crushed	pH8.4	T.ambient	334
1637	7.6-15C	R3	E3	B4	E	7.6-15C-R3	crushed	pH7.6	T.ambient	345
1638	7.6-15C	R3	E3	B4	E	7.6-15C-R3	crushed	pH7.6	T.ambient	255
1639	7.6-15C	R3	E3	B4	E	7.6-15C-R3	crushed	pH7.6	T.ambient	325
1640	7.6-15C	R3	E3	B4	E	7.6-15C-R3	crushed	pH7.6	T.ambient	268
1641	7.6-15C	R3	E3	B4	E	7.6-15C-R3	crushed	pH7.6	T.ambient	325
1642	7.6-15C	R3	E3	B4	E	7.6-15C-R3	crushed	pH7.6	T.ambient	216
1643	7.6-15C	R3	E3	B4	E	7.6-15C-R3	crushed	pH7.6	T.ambient	220
1644	7.6-15C	R3	E3	B4	E	7.6-15C-R3	crushed	pH7.6	T.ambient	354
1645	7.6-15C	R3	E3	B4	E	7.6-15C-R3	crushed	pH7.6	T.ambient	256
1646	7.6-15C	R3	E3	B4	E	7.6-15C-R3	crushed	pH7.6	T.ambient	336
1647	7.6-15C	R3	E3	B4	E	7.6-15C-R3	crushed	pH7.6	T.ambient	344
1648	7.6-15C	R3	E3	B4	E	7.6-15C-R3	crushed	pH7.6	T.ambient	278
1649	7.6-15C	R3	E3	B4	E	7.6-15C-R3	crushed	pH7.6	T.ambient	276
1650	7.6-15C	R3	E3	B4	E	7.6-15C-R3	crushed	pH7.6	T.ambient	338
1651	7.6-15C	R3	E3	B4	E	7.6-15C-R3	crushed	pH7.6	T.ambient	248
1652	7.6-15C	R3	E3	B4	E	7.6-15C-R3	crushed	pH7.6	T.ambient	239
1653	7.6-15C	R3	E3	B4	E	7.6-15C-R3	crushed	pH7.6	T.ambient	257
1654	7.6-15C	R3	E3	B4	E	7.6-15C-R3	crushed	pH7.6	T.ambient	221
1655	7.6-15C	R3	E3	B4	E	7.6-15C-R3	crushed	pH7.6	T.ambient	305
1656	7.6-15C	R3	E3	B4	E	7.6-15C-R3	crushed	pH7.6	T.ambient	279
1657	7.6-15C	R3	E3	B4	E	7.6-15C-R3	crushed	pH7.6	T.ambient	290
1658	7.6-15C	R3	E3	B4	E	7.6-15C-R3	crushed	pH7.6	T.ambient	305
1659	7.6-15C	R3	E3	B4	E	7.6-15C-R3	crushed	pH7.6	T.ambient	316
1660	7.6-15C	R3	E3	B4	E	7.6-15C-R3	crushed	pH7.6	T.ambient	355
1661	7.6-15C	R3	E3	B4	E	7.6-15C-R3	crushed	pH7.6	T.ambient	262
1662	8.0-15C	R4	E4	B6	E	8.0-15C-R4	crushed	pH8.0	T.ambient	232
1663	8.0-15C	R4	E4	B6	E	8.0-15C-R4	crushed	pH8.0	T.ambient	375
1664	8.0-15C	R4	E4	B6	E	8.0-15C-R4	crushed	pH8.0	T.ambient	188
1665	8.0-15C	R4	E4	B6	E	8.0-15C-R4	crushed	pH8.0	T.ambient	210
1666	8.0-15C	R4	E4	B6	E	8.0-15C-R4	crushed	pH8.0	T.ambient	260
1667	8.0-15C	R4	E4	B6	E	8.0-15C-R4	crushed	pH8.0	T.ambient	306
1668	8.0-15C	R4	E4	B6	E	8.0-15C-R4	crushed	pH8.0	T.ambient	335
1669	8.0-15C	R4	E4	B6	E	8.0-15C-R4	crushed	pH8.0	T.ambient	263
1670	8.0-15C	R4	E4	B6	E	8.0-15C-R4	crushed	pH8.0	T.ambient	434
1671	8.0-15C	R4	E4	B6	E	8.0-15C-R4	crushed	pH8.0	T.ambient	119
1672	8.0-15C	R4	E4	B6	E	8.0-15C-R4	crushed	pH8.0	T.ambient	347
1673	8.0-15C	R4	E4	B6	E	8.0-15C-R4	crushed	pH8.0	T.ambient	264
1674	8.0-15C	R4	E4	B6	E	8.0-15C-R4	crushed	pH8.0	T.ambient	300
1675	8.0-15C	R4	E4	B6	E	8.0-15C-R4	crushed	pH8.0	T.ambient	285
1676	8.0-15C	R4	E4	B6	E	8.0-15C-R4	crushed	pH8.0	T.ambient	302
1677	8.0-15C	R4	E4	B6	E	8.0-15C-R4	crushed	pH8.0	T.ambient	351
1678	8.0-15C	R4	E4	B6	E	8.0-15C-R4	crushed	pH8.0	T.ambient	386
1679	8.4-15C	R4	E5	B5	E	8.4-15C-R4	crushed	pH8.4	T.ambient	117
1680	8.4-15C	R4	E5	B5	E	8.4-15C-R4	crushed	pH8.4	T.ambient	166
1681	8.4-15C	R4	E5	B5	E	8.4-15C-R4	crushed	pH8.4	T.ambient	199
1682	8.4-15C	R4	E5	B5	E	8.4-15C-R4	crushed	pH8.4	T.ambient	128
1683	8.4-15C	R4	E5	B5	E	8.4-15C-R4	crushed	pH8.4	T.ambient	126
1684	8.4-15C	R4	E5	B5	E	8.4-15C-R4	crushed	pH8.4	T.ambient	183
1685	8.4-15C	R4	E5	B5	E	8.4-15C-R4	crushed	pH8.4	T.ambient	130
1686	8.4-15C	R4	E5	B5	E	8.4-15C-R4	crushed	pH8.4	T.ambient	191
1687	8.4-15C	R4	E5	B5	E	8.4-15C-R4	crushed	pH8.4	T.ambient	166
1688	8.4-15C	R4	E5	B5	E	8.4-15C-R4	crushed	pH8.4	T.ambient	189
1689	8.4-15C	R4	E5	B5	E	8.4-15C-R4	crushed	pH8.4	T.ambient	142
1690	8.4-15C	R4	E5	B5	E	8.4-15C-R4	crushed	pH8.4	T.ambient	197
1691	8.4-15C	R4	E5	B5	E	8.4-15C-R4	crushed	pH8.4	T.ambient	242
1692	8.4-15C	R4	E5	B5	E	8.4-15C-R4	crushed	pH8.4	T.ambient	232
1693	8.4-15C	R4	E5	B5	E	8.4-15C-R4	crushed	pH8.4	T.ambient	185
1694	8.4-15C	R4	E5	B5	E	8.4-15C-R4	crushed	pH8.4	T.ambient	159
1695	8.4-15C	R4	E5	B5	E	8.4-15C-R4	crushed	pH8.4	T.ambient	110
1696	8.4-15C	R4	E5	B5	E	8.4-15C-R4	crushed	pH8.4	T.ambient	190
1697	8.4-15C	R4	E5	B5	E	8.4-15C-R4	crushed	pH8.4	T.ambient	190
1698	8.4-15C	R4	E5	B5	E	8.4-15C-R4	crushed	pH8.4	T.ambient	155
1699	8.4-15C	R4	E5	B5	E	8.4-15C-R4	crushed	pH8.4	T.ambient	295
1700	7.6-15C	R4	E6	B7	E	7.6-15C-R4	crushed	pH7.6	T.ambient	344
1701	7.6-15C	R4	E6	B7	E	7.6-15C-R4	crushed	pH7.6	T.ambient	258
1702	7.6-15C	R4	E6	B7	E	7.6-15C-R4	crushed	pH7.6	T.ambient	297
1703	7.6-15C	R4	E6	B7	E	7.6-15C-R4	crushed	pH7.6	T.ambient	315
1704	7.6-15C	R4	E6	B7	E	7.6-15C-R4	crushed	pH7.6	T.ambient	339
1705	7.6-15C	R4	E6	B7	E	7.6-15C-R4	crushed	pH7.6	T.ambient	238
1706	7.6-15C	R4	E6	B7	E	7.6-15C-R4	crushed	pH7.6	T.ambient	276
1707	7.6-15C	R4	E6	B7	E	7.6-15C-R4	crushed	pH7.6	T.ambient	237
1708	7.6-15C	R4	E6	B7	E	7.6-15C-R4	crushed	pH7.6	T.ambient	275
1709	7.6-15C	R4	E6	B7	E	7.6-15C-R4	crushed	pH7.6	T.ambient	272
1710	7.6-15C	R4	E6	B7	E	7.6-15C-R4	crushed	pH7.6	T.ambient	255
1711	7.6-15C	R4	E6	B7	E	7.6-15C-R4	crushed	pH7.6	T.ambient	290
1712	7.6-15C	R4	E6	B7	E	7.6-15C-R4	crushed	pH7.6	T.ambient	353
1713	7.6-15C	R4	E6	B7	E	7.6-15C-R4	crushed	pH7.6	T.ambient	234
1714	7.6-15C	R4	E6	B7	E	7.6-15C-R4	crushed	pH7.6	T.ambient	251
1715	7.6-15C	R4	E6	B7	E	7.6-15C-R4	crushed	pH7.6	T.ambient	301
1716	7.6-15C	R4	E6	B7	E	7.6-15C-R4	crushed	pH7.6	T.ambient	276
1717	7.6-15C	R4	E6	B7	E	7.6-15C-R4	crushed	pH7.6	T.ambient	248
1718	7.6-15C	R4	E6	B7	E	7.6-15C-R4	crushed	pH7.6	T.ambient	307
1719	7.6-15C	R4	E6	B7	E	7.6-15C-R4	crushed	pH7.6	T.ambient	353
1720	7.6-15C	R4	E6	B7	E	7.6-15C-R4	crushed	pH7.6	T.ambient	368
1721	7.6-15C	R4	E6	B7	E	7.6-15C-R4	crushed	pH7.6	T.ambient	433
1722	7.6-15C	R4	E6	B7	E	7.6-15C-R4	crushed	pH7.6	T.ambient	246
1723	7.6-15C	R4	E6	B7	E	7.6-15C-R4	crushed	pH7.6	T.ambient	324
1724	7.6-15C	R4	E6	B7	E	7.6-15C-R4	crushed	pH7.6	T.ambient	330
1725	7.6-15C	R4	E6	B7	E	7.6-15C-R4	crushed	pH7.6	T.ambient	251
1726	8.0-18C	R3	E7	B43	E	8.0-18C-R3	crushed	pH8.0	T.plus3C	200
1727	8.0-18C	R3	E7	B43	E	8.0-18C-R3	crushed	pH8.0	T.plus3C	260
1728	8.0-18C	R3	E7	B43	E	8.0-18C-R3	crushed	pH8.0	T.plus3C	300
1729	8.0-18C	R3	E7	B43	E	8.0-18C-R3	crushed	pH8.0	T.plus3C	195
1730	8.0-18C	R3	E7	B43	E	8.0-18C-R3	crushed	pH8.0	T.plus3C	312
1731	8.0-18C	R3	E7	B43	E	8.0-18C-R3	crushed	pH8.0	T.plus3C	181
1732	8.0-18C	R3	E7	B43	E	8.0-18C-R3	crushed	pH8.0	T.plus3C	241
1733	8.0-18C	R3	E7	B43	E	8.0-18C-R3	crushed	pH8.0	T.plus3C	310
1734	8.0-18C	R3	E7	B43	E	8.0-18C-R3	crushed	pH8.0	T.plus3C	223
1735	8.0-18C	R3	E7	B43	E	8.0-18C-R3	crushed	pH8.0	T.plus3C	167
1736	8.0-18C	R3	E7	B43	E	8.0-18C-R3	crushed	pH8.0	T.plus3C	217
1737	8.0-18C	R3	E7	B43	E	8.0-18C-R3	crushed	pH8.0	T.plus3C	153
1738	8.0-18C	R3	E7	B43	E	8.0-18C-R3	crushed	pH8.0	T.plus3C	144
1739	8.0-18C	R3	E7	B43	E	8.0-18C-R3	crushed	pH8.0	T.plus3C	169
1740	8.0-18C	R3	E7	B43	E	8.0-18C-R3	crushed	pH8.0	T.plus3C	162
1741	8.0-18C	R3	E7	B43	E	8.0-18C-R3	crushed	pH8.0	T.plus3C	190
1742	8.0-18C	R3	E7	B43	E	8.0-18C-R3	crushed	pH8.0	T.plus3C	188
1743	8.0-18C	R3	E7	B43	E	8.0-18C-R3	crushed	pH8.0	T.plus3C	151
1744	8.4-18C	R3	E8	B42	E	8.4-18C-R3	crushed	pH8.4	T.plus3C	176
1745	8.4-18C	R3	E8	B42	E	8.4-18C-R3	crushed	pH8.4	T.plus3C	79
1746	8.4-18C	R3	E8	B42	E	8.4-18C-R3	crushed	pH8.4	T.plus3C	117
1747	8.4-18C	R3	E8	B42	E	8.4-18C-R3	crushed	pH8.4	T.plus3C	114
1748	8.4-18C	R3	E8	B42	E	8.4-18C-R3	crushed	pH8.4	T.plus3C	131
1749	8.4-18C	R3	E8	B42	E	8.4-18C-R3	crushed	pH8.4	T.plus3C	147
1750	8.4-18C	R3	E8	B42	E	8.4-18C-R3	crushed	pH8.4	T.plus3C	189
1751	8.4-18C	R3	E8	B42	E	8.4-18C-R3	crushed	pH8.4	T.plus3C	96
1752	8.4-18C	R3	E8	B42	E	8.4-18C-R3	crushed	pH8.4	T.plus3C	95
1753	7.6-18C	R3	E9	B44	E	7.6-18C-R3	crushed	pH7.6	T.plus3C	226
1754	7.6-18C	R3	E9	B44	E	7.6-18C-R3	crushed	pH7.6	T.plus3C	270
1755	7.6-18C	R3	E9	B44	E	7.6-18C-R3	crushed	pH7.6	T.plus3C	152
1756	7.6-18C	R3	E9	B44	E	7.6-18C-R3	crushed	pH7.6	T.plus3C	297
1757	7.6-18C	R3	E9	B44	E	7.6-18C-R3	crushed	pH7.6	T.plus3C	159
1758	7.6-18C	R3	E9	B44	E	7.6-18C-R3	crushed	pH7.6	T.plus3C	317
1759	7.6-18C	R3	E9	B44	E	7.6-18C-R3	crushed	pH7.6	T.plus3C	136
1760	7.6-18C	R3	E9	B44	E	7.6-18C-R3	crushed	pH7.6	T.plus3C	145
1761	7.6-18C	R3	E9	B44	E	7.6-18C-R3	crushed	pH7.6	T.plus3C	183
1762	7.6-18C	R3	E9	B44	E	7.6-18C-R3	crushed	pH7.6	T.plus3C	181
1763	7.6-18C	R3	E9	B44	E	7.6-18C-R3	crushed	pH7.6	T.plus3C	238
1764	7.6-18C	R3	E9	B44	E	7.6-18C-R3	crushed	pH7.6	T.plus3C	326
1765	7.6-18C	R3	E9	B44	E	7.6-18C-R3	crushed	pH7.6	T.plus3C	368
1766	7.6-18C	R3	E9	B44	E	7.6-18C-R3	crushed	pH7.6	T.plus3C	377
1767	8.0-18C	R4	E10	B46	E	8.0-18C-R4	crushed	pH8.0	T.plus3C	292
1768	8.0-18C	R4	E10	B46	E	8.0-18C-R4	crushed	pH8.0	T.plus3C	171
1769	8.0-18C	R4	E10	B46	E	8.0-18C-R4	crushed	pH8.0	T.plus3C	244
1770	8.0-18C	R4	E10	B46	E	8.0-18C-R4	crushed	pH8.0	T.plus3C	217
1771	8.0-18C	R4	E10	B46	E	8.0-18C-R4	crushed	pH8.0	T.plus3C	166
1772	8.0-18C	R4	E10	B46	E	8.0-18C-R4	crushed	pH8.0	T.plus3C	192
1773	8.0-18C	R4	E10	B46	E	8.0-18C-R4	crushed	pH8.0	T.plus3C	138
1774	8.0-18C	R4	E10	B46	E	8.0-18C-R4	crushed	pH8.0	T.plus3C	218
1775	8.0-18C	R4	E10	B46	E	8.0-18C-R4	crushed	pH8.0	T.plus3C	287
1776	8.0-18C	R4	E10	B46	E	8.0-18C-R4	crushed	pH8.0	T.plus3C	308
1777	8.0-18C	R4	E10	B46	E	8.0-18C-R4	crushed	pH8.0	T.plus3C	211
1778	8.0-18C	R4	E10	B46	E	8.0-18C-R4	crushed	pH8.0	T.plus3C	327
1779	8.0-18C	R4	E10	B46	E	8.0-18C-R4	crushed	pH8.0	T.plus3C	199
1780	8.4-18C	R4	E11	B45	E	8.4-18C-R4	crushed	pH8.4	T.plus3C	132
1781	8.4-18C	R4	E11	B45	E	8.4-18C-R4	crushed	pH8.4	T.plus3C	274
1782	8.4-18C	R4	E11	B45	E	8.4-18C-R4	crushed	pH8.4	T.plus3C	131
1783	8.4-18C	R4	E11	B45	E	8.4-18C-R4	crushed	pH8.4	T.plus3C	86
1784	8.4-18C	R4	E11	B45	E	8.4-18C-R4	crushed	pH8.4	T.plus3C	198
1785	8.4-18C	R4	E11	B45	E	8.4-18C-R4	crushed	pH8.4	T.plus3C	175
1786	8.4-18C	R4	E11	B45	E	8.4-18C-R4	crushed	pH8.4	T.plus3C	129
1787	8.4-18C	R4	E11	B45	E	8.4-18C-R4	crushed	pH8.4	T.plus3C	124
1788	8.4-18C	R4	E11	B45	E	8.4-18C-R4	crushed	pH8.4	T.plus3C	199
1789	8.4-18C	R4	E11	B45	E	8.4-18C-R4	crushed	pH8.4	T.plus3C	61
1790	7.6-18C	R4	E12	B47	E	7.6-18C-R4	crushed	pH7.6	T.plus3C	362
1791	7.6-18C	R4	E12	B47	E	7.6-18C-R4	crushed	pH7.6	T.plus3C	261
1792	7.6-18C	R4	E12	B47	E	7.6-18C-R4	crushed	pH7.6	T.plus3C	388
1793	7.6-18C	R4	E12	B47	E	7.6-18C-R4	crushed	pH7.6	T.plus3C	394
1794	7.6-18C	R4	E12	B47	E	7.6-18C-R4	crushed	pH7.6	T.plus3C	328
1795	7.6-18C	R4	E12	B47	E	7.6-18C-R4	crushed	pH7.6	T.plus3C	239
1796	7.6-18C	R4	E12	B47	E	7.6-18C-R4	crushed	pH7.6	T.plus3C	392
1797	7.6-18C	R4	E12	B47	E	7.6-18C-R4	crushed	pH7.6	T.plus3C	264
1798	7.6-18C	R4	E12	B47	E	7.6-18C-R4	crushed	pH7.6	T.plus3C	228
1799	7.6-18C	R4	E12	B47	E	7.6-18C-R4	crushed	pH7.6	T.plus3C	283
1800	7.6-18C	R4	E12	B47	E	7.6-18C-R4	crushed	pH7.6	T.plus3C	183
1801	7.6-18C	R4	E12	B47	E	7.6-18C-R4	crushed	pH7.6	T.plus3C	288
1802	7.6-18C	R4	E12	B47	E	7.6-18C-R4	crushed	pH7.6	T.plus3C	139
1803	8.0-15C	R5	F1	B2	F	8.0-15C-R5	crushed	pH8.0	T.ambient	170
1804	8.0-15C	R5	F1	B2	F	8.0-15C-R5	crushed	pH8.0	T.ambient	101
1805	8.0-15C	R5	F1	B2	F	8.0-15C-R5	crushed	pH8.0	T.ambient	266
1806	8.0-15C	R5	F1	B2	F	8.0-15C-R5	crushed	pH8.0	T.ambient	199
1807	8.0-15C	R5	F1	B2	F	8.0-15C-R5	crushed	pH8.0	T.ambient	181
1808	8.0-15C	R5	F1	B2	F	8.0-15C-R5	crushed	pH8.0	T.ambient	335
1809	8.0-15C	R5	F1	B2	F	8.0-15C-R5	crushed	pH8.0	T.ambient	219
1810	8.0-15C	R5	F1	B2	F	8.0-15C-R5	crushed	pH8.0	T.ambient	246
1811	8.0-15C	R5	F1	B2	F	8.0-15C-R5	crushed	pH8.0	T.ambient	162
1812	8.0-15C	R5	F1	B2	F	8.0-15C-R5	crushed	pH8.0	T.ambient	207
1813	8.0-15C	R5	F1	B2	F	8.0-15C-R5	crushed	pH8.0	T.ambient	505
1814	8.0-15C	R5	F1	B2	F	8.0-15C-R5	crushed	pH8.0	T.ambient	544
1815	8.0-15C	R5	F1	B2	F	8.0-15C-R5	crushed	pH8.0	T.ambient	200
1816	8.0-15C	R5	F1	B2	F	8.0-15C-R5	crushed	pH8.0	T.ambient	233
1817	8.0-15C	R5	F1	B2	F	8.0-15C-R5	crushed	pH8.0	T.ambient	231
1818	8.0-15C	R5	F1	B2	F	8.0-15C-R5	crushed	pH8.0	T.ambient	376
1819	8.0-15C	R5	F1	B2	F	8.0-15C-R5	crushed	pH8.0	T.ambient	225
1820	8.0-15C	R5	F1	B2	F	8.0-15C-R5	crushed	pH8.0	T.ambient	326
1821	8.0-15C	R5	F1	B2	F	8.0-15C-R5	crushed	pH8.0	T.ambient	173
1822	8.0-15C	R5	F1	B2	F	8.0-15C-R5	crushed	pH8.0	T.ambient	302
1823	8.0-15C	R5	F1	B2	F	8.0-15C-R5	crushed	pH8.0	T.ambient	212
1824	7.6-15C	R5	F3	B3	F	7.6-15C-R5	crushed	pH7.6	T.ambient	242
1825	7.6-15C	R5	F3	B3	F	7.6-15C-R5	crushed	pH7.6	T.ambient	187
1826	7.6-15C	R5	F3	B3	F	7.6-15C-R5	crushed	pH7.6	T.ambient	299
1827	7.6-15C	R5	F3	B3	F	7.6-15C-R5	crushed	pH7.6	T.ambient	177
1828	7.6-15C	R5	F3	B3	F	7.6-15C-R5	crushed	pH7.6	T.ambient	266
1829	7.6-15C	R5	F3	B3	F	7.6-15C-R5	crushed	pH7.6	T.ambient	158
1830	7.6-15C	R5	F3	B3	F	7.6-15C-R5	crushed	pH7.6	T.ambient	220
1831	7.6-15C	R5	F3	B3	F	7.6-15C-R5	crushed	pH7.6	T.ambient	340
1832	7.6-15C	R5	F3	B3	F	7.6-15C-R5	crushed	pH7.6	T.ambient	322
1833	7.6-15C	R5	F3	B3	F	7.6-15C-R5	crushed	pH7.6	T.ambient	146
1834	7.6-15C	R5	F3	B3	F	7.6-15C-R5	crushed	pH7.6	T.ambient	250
1835	7.6-15C	R5	F3	B3	F	7.6-15C-R5	crushed	pH7.6	T.ambient	275
1836	7.6-15C	R5	F3	B3	F	7.6-15C-R5	crushed	pH7.6	T.ambient	179
1837	7.6-15C	R5	F3	B3	F	7.6-15C-R5	crushed	pH7.6	T.ambient	116
1838	7.6-15C	R5	F3	B3	F	7.6-15C-R5	crushed	pH7.6	T.ambient	291
1839	7.6-15C	R5	F3	B3	F	7.6-15C-R5	crushed	pH7.6	T.ambient	137
1840	7.6-15C	R5	F3	B3	F	7.6-15C-R5	crushed	pH7.6	T.ambient	315
1841	7.6-15C	R5	F3	B3	F	7.6-15C-R5	crushed	pH7.6	T.ambient	195
1842	8.4-15C	R5	F2	B4	F	8.4-15C-R5	crushed	pH8.4	T.ambient	390
1843	8.4-15C	R5	F2	B4	F	8.4-15C-R5	crushed	pH8.4	T.ambient	172
1844	8.4-15C	R5	F2	B4	F	8.4-15C-R5	crushed	pH8.4	T.ambient	210
1845	8.4-15C	R5	F2	B4	F	8.4-15C-R5	crushed	pH8.4	T.ambient	242
1846	8.4-15C	R5	F2	B4	F	8.4-15C-R5	crushed	pH8.4	T.ambient	313
1847	8.4-15C	R5	F2	B4	F	8.4-15C-R5	crushed	pH8.4	T.ambient	149
1848	8.4-15C	R5	F2	B4	F	8.4-15C-R5	crushed	pH8.4	T.ambient	301
1849	8.4-15C	R5	F2	B4	F	8.4-15C-R5	crushed	pH8.4	T.ambient	143
1850	8.4-15C	R5	F2	B4	F	8.4-15C-R5	crushed	pH8.4	T.ambient	143
1851	8.4-15C	R5	F2	B4	F	8.4-15C-R5	crushed	pH8.4	T.ambient	190
1852	8.4-15C	R5	F2	B4	F	8.4-15C-R5	crushed	pH8.4	T.ambient	282
1853	8.4-15C	R5	F2	B4	F	8.4-15C-R5	crushed	pH8.4	T.ambient	255
1854	8.0-15C	R6	F4	B5	F	8.0-15C-R6	crushed	pH8.0	T.ambient	191
1855	8.0-15C	R6	F4	B5	F	8.0-15C-R6	crushed	pH8.0	T.ambient	156
1856	8.0-15C	R6	F4	B5	F	8.0-15C-R6	crushed	pH8.0	T.ambient	191
1857	8.0-15C	R6	F4	B5	F	8.0-15C-R6	crushed	pH8.0	T.ambient	114
1858	8.0-15C	R6	F4	B5	F	8.0-15C-R6	crushed	pH8.0	T.ambient	336
1859	8.0-15C	R6	F4	B5	F	8.0-15C-R6	crushed	pH8.0	T.ambient	143
1860	8.0-15C	R6	F4	B5	F	8.0-15C-R6	crushed	pH8.0	T.ambient	106
1861	8.0-15C	R6	F4	B5	F	8.0-15C-R6	crushed	pH8.0	T.ambient	192
1862	8.0-15C	R6	F4	B5	F	8.0-15C-R6	crushed	pH8.0	T.ambient	476
1863	8.0-15C	R6	F4	B5	F	8.0-15C-R6	crushed	pH8.0	T.ambient	369
1864	8.0-15C	R6	F4	B5	F	8.0-15C-R6	crushed	pH8.0	T.ambient	239
1865	8.0-15C	R6	F4	B5	F	8.0-15C-R6	crushed	pH8.0	T.ambient	269
1866	8.0-15C	R6	F4	B5	F	8.0-15C-R6	crushed	pH8.0	T.ambient	123
1867	8.0-15C	R6	F4	B5	F	8.0-15C-R6	crushed	pH8.0	T.ambient	153
1868	8.0-15C	R6	F4	B5	F	8.0-15C-R6	crushed	pH8.0	T.ambient	357
1869	8.0-15C	R6	F4	B5	F	8.0-15C-R6	crushed	pH8.0	T.ambient	241
1870	8.0-15C	R6	F4	B5	F	8.0-15C-R6	crushed	pH8.0	T.ambient	224
1871	7.6-15C	R6	F6	B6	F	7.6-15C-R6	crushed	pH7.6	T.ambient	274
1872	7.6-15C	R6	F6	B6	F	7.6-15C-R6	crushed	pH7.6	T.ambient	104
1873	7.6-15C	R6	F6	B6	F	7.6-15C-R6	crushed	pH7.6	T.ambient	113
1874	7.6-15C	R6	F6	B6	F	7.6-15C-R6	crushed	pH7.6	T.ambient	165
1875	7.6-15C	R6	F6	B6	F	7.6-15C-R6	crushed	pH7.6	T.ambient	131
1876	7.6-15C	R6	F6	B6	F	7.6-15C-R6	crushed	pH7.6	T.ambient	252
1877	7.6-15C	R6	F6	B6	F	7.6-15C-R6	crushed	pH7.6	T.ambient	180
1878	7.6-15C	R6	F6	B6	F	7.6-15C-R6	crushed	pH7.6	T.ambient	170
1879	7.6-15C	R6	F6	B6	F	7.6-15C-R6	crushed	pH7.6	T.ambient	380
1880	7.6-15C	R6	F6	B6	F	7.6-15C-R6	crushed	pH7.6	T.ambient	183
1881	7.6-15C	R6	F6	B6	F	7.6-15C-R6	crushed	pH7.6	T.ambient	194
1882	7.6-15C	R6	F6	B6	F	7.6-15C-R6	crushed	pH7.6	T.ambient	240
1883	7.6-15C	R6	F6	B6	F	7.6-15C-R6	crushed	pH7.6	T.ambient	223
1884	7.6-15C	R6	F6	B6	F	7.6-15C-R6	crushed	pH7.6	T.ambient	274
1885	7.6-15C	R6	F6	B6	F	7.6-15C-R6	crushed	pH7.6	T.ambient	186
1886	7.6-15C	R6	F6	B6	F	7.6-15C-R6	crushed	pH7.6	T.ambient	275
1887	7.6-15C	R6	F6	B6	F	7.6-15C-R6	crushed	pH7.6	T.ambient	286
1888	8.4-15C	R6	F5	B7	F	8.4-15C-R6	crushed	pH8.4	T.ambient	116
1889	8.4-15C	R6	F5	B7	F	8.4-15C-R6	crushed	pH8.4	T.ambient	290
1890	8.4-15C	R6	F5	B7	F	8.4-15C-R6	crushed	pH8.4	T.ambient	248
1891	8.4-15C	R6	F5	B7	F	8.4-15C-R6	crushed	pH8.4	T.ambient	96
1892	8.4-15C	R6	F5	B7	F	8.4-15C-R6	crushed	pH8.4	T.ambient	157
1893	8.4-15C	R6	F5	B7	F	8.4-15C-R6	crushed	pH8.4	T.ambient	160
1894	8.4-15C	R6	F5	B7	F	8.4-15C-R6	crushed	pH8.4	T.ambient	329
1895	8.4-15C	R6	F5	B7	F	8.4-15C-R6	crushed	pH8.4	T.ambient	317
1896	8.4-15C	R6	F5	B7	F	8.4-15C-R6	crushed	pH8.4	T.ambient	170
1897	8.4-15C	R6	F5	B7	F	8.4-15C-R6	crushed	pH8.4	T.ambient	314
1898	8.4-15C	R6	F5	B7	F	8.4-15C-R6	crushed	pH8.4	T.ambient	256
1899	8.4-15C	R6	F5	B7	F	8.4-15C-R6	crushed	pH8.4	T.ambient	196
1900	8.4-15C	R6	F5	B7	F	8.4-15C-R6	crushed	pH8.4	T.ambient	223
1901	8.4-15C	R6	F5	B7	F	8.4-15C-R6	crushed	pH8.4	T.ambient	244
1902	8.0-18C	R5	F7	B42	F	8.0-18C-R5	crushed	pH8.0	T.plus3C	152
1903	8.0-18C	R5	F7	B42	F	8.0-18C-R5	crushed	pH8.0	T.plus3C	140
1904	8.0-18C	R5	F7	B42	F	8.0-18C-R5	crushed	pH8.0	T.plus3C	259
1905	8.0-18C	R5	F7	B42	F	8.0-18C-R5	crushed	pH8.0	T.plus3C	221
1906	8.0-18C	R5	F7	B42	F	8.0-18C-R5	crushed	pH8.0	T.plus3C	145
1907	8.0-18C	R5	F7	B42	F	8.0-18C-R5	crushed	pH8.0	T.plus3C	310
1908	8.0-18C	R5	F7	B42	F	8.0-18C-R5	crushed	pH8.0	T.plus3C	200
1909	8.0-18C	R5	F7	B42	F	8.0-18C-R5	crushed	pH8.0	T.plus3C	290
1910	8.0-18C	R5	F7	B42	F	8.0-18C-R5	crushed	pH8.0	T.plus3C	318
1911	8.0-18C	R5	F7	B42	F	8.0-18C-R5	crushed	pH8.0	T.plus3C	440
1912	8.0-18C	R5	F7	B42	F	8.0-18C-R5	crushed	pH8.0	T.plus3C	214
1913	8.0-18C	R5	F7	B42	F	8.0-18C-R5	crushed	pH8.0	T.plus3C	135
1914	7.6-18C	R5	F9	B43	F	7.6-18C-R5	crushed	pH7.6	T.plus3C	146
1915	7.6-18C	R5	F9	B43	F	7.6-18C-R5	crushed	pH7.6	T.plus3C	111
1916	7.6-18C	R5	F9	B43	F	7.6-18C-R5	crushed	pH7.6	T.plus3C	107
1917	7.6-18C	R5	F9	B43	F	7.6-18C-R5	crushed	pH7.6	T.plus3C	189
1918	7.6-18C	R5	F9	B43	F	7.6-18C-R5	crushed	pH7.6	T.plus3C	157
1919	7.6-18C	R5	F9	B43	F	7.6-18C-R5	crushed	pH7.6	T.plus3C	82
1920	7.6-18C	R5	F9	B43	F	7.6-18C-R5	crushed	pH7.6	T.plus3C	183
1921	7.6-18C	R5	F9	B43	F	7.6-18C-R5	crushed	pH7.6	T.plus3C	192
1922	7.6-18C	R5	F9	B43	F	7.6-18C-R5	crushed	pH7.6	T.plus3C	223
1923	7.6-18C	R5	F9	B43	F	7.6-18C-R5	crushed	pH7.6	T.plus3C	200
1924	7.6-18C	R5	F9	B43	F	7.6-18C-R5	crushed	pH7.6	T.plus3C	121
1925	8.4-18C	R5	F8	B44	F	8.4-18C-R5	crushed	pH8.4	T.plus3C	141
1926	8.4-18C	R5	F8	B44	F	8.4-18C-R5	crushed	pH8.4	T.plus3C	150
1927	8.4-18C	R5	F8	B44	F	8.4-18C-R5	crushed	pH8.4	T.plus3C	373
1928	8.4-18C	R5	F8	B44	F	8.4-18C-R5	crushed	pH8.4	T.plus3C	120
1929	8.4-18C	R5	F8	B44	F	8.4-18C-R5	crushed	pH8.4	T.plus3C	179
1930	8.4-18C	R5	F8	B44	F	8.4-18C-R5	crushed	pH8.4	T.plus3C	104
1931	8.4-18C	R5	F8	B44	F	8.4-18C-R5	crushed	pH8.4	T.plus3C	108
1932	8.0-18C	R6	F10	B45	F	8.0-18C-R6	crushed	pH8.0	T.plus3C	160
1933	8.0-18C	R6	F10	B45	F	8.0-18C-R6	crushed	pH8.0	T.plus3C	153
1934	8.0-18C	R6	F10	B45	F	8.0-18C-R6	crushed	pH8.0	T.plus3C	129
1935	8.0-18C	R6	F10	B45	F	8.0-18C-R6	crushed	pH8.0	T.plus3C	172
1936	8.0-18C	R6	F10	B45	F	8.0-18C-R6	crushed	pH8.0	T.plus3C	272
1937	8.0-18C	R6	F10	B45	F	8.0-18C-R6	crushed	pH8.0	T.plus3C	75
1938	8.0-18C	R6	F10	B45	F	8.0-18C-R6	crushed	pH8.0	T.plus3C	184
1939	8.0-18C	R6	F10	B45	F	8.0-18C-R6	crushed	pH8.0	T.plus3C	259
1940	8.0-18C	R6	F10	B45	F	8.0-18C-R6	crushed	pH8.0	T.plus3C	221
1941	8.0-18C	R6	F10	B45	F	8.0-18C-R6	crushed	pH8.0	T.plus3C	145
1942	8.0-18C	R6	F10	B45	F	8.0-18C-R6	crushed	pH8.0	T.plus3C	310
1943	8.0-18C	R6	F10	B45	F	8.0-18C-R6	crushed	pH8.0	T.plus3C	120
1944	8.0-18C	R6	F10	B45	F	8.0-18C-R6	crushed	pH8.0	T.plus3C	247
1945	7.6-18C	R6	F12	B46	F	7.6-18C-R6	crushed	pH7.6	T.plus3C	310
1946	7.6-18C	R6	F12	B46	F	7.6-18C-R6	crushed	pH7.6	T.plus3C	268
1947	7.6-18C	R6	F12	B46	F	7.6-18C-R6	crushed	pH7.6	T.plus3C	264
1948	7.6-18C	R6	F12	B46	F	7.6-18C-R6	crushed	pH7.6	T.plus3C	210
1949	7.6-18C	R6	F12	B46	F	7.6-18C-R6	crushed	pH7.6	T.plus3C	205
1950	7.6-18C	R6	F12	B46	F	7.6-18C-R6	crushed	pH7.6	T.plus3C	130
1951	7.6-18C	R6	F12	B46	F	7.6-18C-R6	crushed	pH7.6	T.plus3C	157
1952	7.6-18C	R6	F12	B46	F	7.6-18C-R6	crushed	pH7.6	T.plus3C	199
1953	7.6-18C	R6	F12	B46	F	7.6-18C-R6	crushed	pH7.6	T.plus3C	291
1954	7.6-18C	R6	F12	B46	F	7.6-18C-R6	crushed	pH7.6	T.plus3C	183
1955	7.6-18C	R6	F12	B46	F	7.6-18C-R6	crushed	pH7.6	T.plus3C	151
1956	7.6-18C	R6	F12	B46	F	7.6-18C-R6	crushed	pH7.6	T.plus3C	152
1957	7.6-18C	R6	F12	B46	F	7.6-18C-R6	crushed	pH7.6	T.plus3C	240
1958	7.6-18C	R6	F12	B46	F	7.6-18C-R6	crushed	pH7.6	T.plus3C	254
1959	7.6-18C	R6	F12	B46	F	7.6-18C-R6	crushed	pH7.6	T.plus3C	276
1960	8.4-18C	R6	F11	B47	F	8.4-18C-R6	crushed	pH8.4	T.plus3C	136
1961	8.4-18C	R6	F11	B47	F	8.4-18C-R6	crushed	pH8.4	T.plus3C	163
1962	8.4-18C	R6	F11	B47	F	8.4-18C-R6	crushed	pH8.4	T.plus3C	102
1963	8.4-18C	R6	F11	B47	F	8.4-18C-R6	crushed	pH8.4	T.plus3C	280
1964	8.0-15C	R1	D1	B2	D	8.0-15C-R1	crushed	pH8.0	T.ambient	288
1965	8.0-15C	R1	D1	B2	D	8.0-15C-R1	crushed	pH8.0	T.ambient	341
1966	8.0-15C	R1	D1	B2	D	8.0-15C-R1	crushed	pH8.0	T.ambient	461
1967	8.0-15C	R1	D1	B2	D	8.0-15C-R1	crushed	pH8.0	T.ambient	222
1968	8.0-15C	R1	D1	B2	D	8.0-15C-R1	crushed	pH8.0	T.ambient	423
1969	8.0-15C	R1	D1	B2	D	8.0-15C-R1	crushed	pH8.0	T.ambient	383
1970	8.0-15C	R1	D1	B2	D	8.0-15C-R1	crushed	pH8.0	T.ambient	321
1971	8.0-15C	R1	D1	B2	D	8.0-15C-R1	crushed	pH8.0	T.ambient	275
1972	8.0-15C	R1	D1	B2	D	8.0-15C-R1	crushed	pH8.0	T.ambient	358
1973	8.0-15C	R1	D1	B2	D	8.0-15C-R1	crushed	pH8.0	T.ambient	381
1974	8.4-15C	R1	D2	B3	D	8.4-15C-R1	crushed	pH8.4	T.ambient	361
1975	8.4-15C	R1	D2	B3	D	8.4-15C-R1	crushed	pH8.4	T.ambient	189
1976	8.4-15C	R1	D2	B3	D	8.4-15C-R1	crushed	pH8.4	T.ambient	358
1977	8.4-15C	R1	D2	B3	D	8.4-15C-R1	crushed	pH8.4	T.ambient	225
1978	8.4-15C	R1	D2	B3	D	8.4-15C-R1	crushed	pH8.4	T.ambient	202
1979	8.4-15C	R1	D2	B3	D	8.4-15C-R1	crushed	pH8.4	T.ambient	413
1980	8.4-15C	R1	D2	B3	D	8.4-15C-R1	crushed	pH8.4	T.ambient	320
1981	8.4-15C	R1	D2	B3	D	8.4-15C-R1	crushed	pH8.4	T.ambient	366
1982	8.4-15C	R1	D2	B3	D	8.4-15C-R1	crushed	pH8.4	T.ambient	233
1983	8.4-15C	R1	D2	B3	D	8.4-15C-R1	crushed	pH8.4	T.ambient	437
1984	8.4-15C	R1	D2	B3	D	8.4-15C-R1	crushed	pH8.4	T.ambient	266
1985	8.4-15C	R1	D2	B3	D	8.4-15C-R1	crushed	pH8.4	T.ambient	335
1986	8.4-15C	R1	D2	B3	D	8.4-15C-R1	crushed	pH8.4	T.ambient	205
1987	7.6-15C	R1	D3	B4	D	7.6-15C-R1	crushed	pH7.6	T.ambient	338
1988	7.6-15C	R1	D3	B4	D	7.6-15C-R1	crushed	pH7.6	T.ambient	295
1989	7.6-15C	R1	D3	B4	D	7.6-15C-R1	crushed	pH7.6	T.ambient	261
1990	7.6-15C	R1	D3	B4	D	7.6-15C-R1	crushed	pH7.6	T.ambient	317
1991	7.6-15C	R1	D3	B4	D	7.6-15C-R1	crushed	pH7.6	T.ambient	234
1992	7.6-15C	R1	D3	B4	D	7.6-15C-R1	crushed	pH7.6	T.ambient	385
1993	7.6-15C	R1	D3	B4	D	7.6-15C-R1	crushed	pH7.6	T.ambient	470
1994	7.6-15C	R1	D3	B4	D	7.6-15C-R1	crushed	pH7.6	T.ambient	392
1995	7.6-15C	R1	D3	B4	D	7.6-15C-R1	crushed	pH7.6	T.ambient	181
1996	7.6-15C	R1	D3	B4	D	7.6-15C-R1	crushed	pH7.6	T.ambient	253
1997	7.6-15C	R1	D3	B4	D	7.6-15C-R1	crushed	pH7.6	T.ambient	294
1998	8.0-15C	R2	D4	B5	D	8.0-15C-R2	crushed	pH8.0	T.ambient	457
1999	8.0-15C	R2	D4	B5	D	8.0-15C-R2	crushed	pH8.0	T.ambient	388
[truncated: 150 more rows]

## Sheet: growth, 3 diets
Reference#	Conditions	Replicate	Beaker	Motor	Experiment	Code	Diet	pH	Temp	Stage Days	Body Length (um)	Body Width (um)	Gonad Length (um)	Gonad Width (um)	Trunk Length (um)	Trunk Volume (um3)	Gonad Volume (um3)	Gonadosomatic Index (GSI)
1	8.0-15C	R1	B1	B2	B	8.0-15C-R1	standard	pH8.0	T.ambient	D3	309.34	129.946	59.8081	28.0973	281.242	2.4866e+06	52623.9	2.07244				Summary growth (body length) data
2	8.0-15C	R1	B1	B2	B	8.0-15C-R1	standard	pH8.0	T.ambient	D3	321.78	154.688	76.2407	34.4627	287.318	3.59975e+06	104887	2.83124				Diet	Stage	pH	Temperature	Mean body length (um)	Stdev
3	8.0-15C	R1	B1	B2	B	8.0-15C-R1	standard	pH8.0	T.ambient	D3	366.387	179.988	96.0675	46.161	320.226	5.4318e+06	223063	3.94462				Standard	D3	pH7.6	T.ambient	362.35	30.7023
4	8.0-15C	R1	B1	B2	B	8.0-15C-R1	standard	pH8.0	T.ambient	D3	314.803	148.794	98.6862	30.8244	283.978	3.29198e+06	157183	4.55715				Standard	D3	pH8.0	T.ambient	357.304	37.7319
5	8.0-15C	R1	B1	B2	B	8.0-15C-R1	standard	pH8.0	T.ambient	D3	273.531	126.872	71.1695	24.3688	249.162	2.09997e+06	64628	2.98568				Standard	D3	pH8.4	T.ambient	362.069	36.1355
6	8.0-15C	R1	B1	B2	B	8.0-15C-R1	standard	pH8.0	T.ambient	D3	281.787	101.306	42.7017	22.7374	259.049	1.39205e+06	21708.5	1.53552				Standard	D3	pH7.6	T.plus3C	465.746	67.9107
7	8.0-15C	R1	B1	B2	B	8.0-15C-R1	standard	pH8.0	T.ambient	D3	321.906	157.174	89.9067	39.0259	282.88	3.65901e+06	165172	4.31914				Standard	D3	pH8.0	T.plus3C	447.062	64.6683
8	8.0-15C	R1	B1	B2	B	8.0-15C-R1	standard	pH8.0	T.ambient	D3	281.824	128.105	88.8514	33.8491	247.975	2.13078e+06	139918	6.16189				Standard	D3	pH8.4	T.plus3C	444.685	78.7174
9	8.0-15C	R1	B1	B2	B	8.0-15C-R1	standard	pH8.0	T.ambient	D3	287.054	117.762	79.2951	33.1188	253.936	1.84388e+06	109035	5.58318				Standard	D4	pH7.6	T.ambient	560.023	64.6404
10	8.0-15C	R1	B1	B2	B	8.0-15C-R1	standard	pH8.0	T.ambient	D3	307.213	135.035	93.8605	29.0748	278.138	2.65553e+06	134116	4.80765				Standard	D4	pH8.0	T.ambient	550.336	94.0688
11	8.0-15C	R1	B1	B2	B	8.0-15C-R1	standard	pH8.0	T.ambient	D3	357.223	191.224	97.1882	28.5902	328.632	6.29207e+06	141398	2.19785				Standard	D4	pH8.4	T.ambient	537.049	75.1701
12	8.0-15C	R1	B1	B2	B	8.0-15C-R1	standard	pH8.0	T.ambient	D3	322.968	173.908	74.1973	35.2643	287.703	4.55598e+06	101651	2.18245				Standard	D4	pH7.6	T.plus3C	771.255	135.251
13	8.0-15C	R1	B1	B2	B	8.0-15C-R1	standard	pH8.0	T.ambient	D3	292.007	131.973	75.6889	34.4627	257.545	2.34868e+06	103374	4.21582				Standard	D4	pH8.0	T.plus3C	737.767	117.277
14	8.0-15C	R1	B1	B2	B	8.0-15C-R1	standard	pH8.0	T.ambient	D3	351.655	172.476	137.063	31.9375	319.717	4.97991e+06	314153	5.93407				Standard	D4	pH8.4	T.plus3C	710.788	112.456
15	8.0-15C	R1	B1	B2	B	8.0-15C-R1	standard	pH8.0	T.ambient	D3	365.897	170.233	117.762	28.4678	337.429	5.12001e+06	206711	3.88064				Standard	D5	pH7.6	T.ambient	861.86	130.922
16	8.0-15C	R1	B1	B2	B	8.0-15C-R1	standard	pH8.0	T.ambient	D3	265.009	95.5205	35.5602	33.8491	231.16	1.10434e+06	22411.7	1.98905				Standard	D5	pH8.0	T.ambient	874.574	126.533
17	8.0-15C	R1	B1	B2	B	8.0-15C-R1	standard	pH8.0	T.ambient	D3	342.294	162.012	116.33	30.8244	311.47	4.28062e+06	218411	4.85462				Standard	D5	pH8.4	T.ambient	872.726	116.426
18	8.0-15C	R1	B1	B2	B	8.0-15C-R1	standard	pH8.0	T.ambient	D3	291.901	130.884	71.8048	35.2643	256.637	2.30191e+06	95200.9	3.97148				Standard	D5	pH7.6	T.plus3C	NA	NA
19	8.0-15C	R1	B1	B2	B	8.0-15C-R1	standard	pH8.0	T.ambient	D3	291.167	127.312	46.7624	24.3688	266.798	2.26423e+06	27901.4	1.21727				Standard	D5	pH8.0	T.plus3C	NA	NA
20	8.0-15C	R1	B1	B2	B	8.0-15C-R1	standard	pH8.0	T.ambient	D3	365.818	171.317	154.755	47.6504	318.168	4.88943e+06	597526	10.8899				Standard	D5	pH8.4	T.plus3C	NA	NA
21	8.0-15C	R1	B1	B2	B	8.0-15C-R1	standard	pH8.0	T.ambient	D3	286.115	133.028	67.3879	35.951	250.164	2.31798e+06	85481.8	3.55661
22	8.0-15C	R1	B1	B2	B	8.0-15C-R1	standard	pH8.0	T.ambient	D3	295.504	128.975	72.579	41.7922	253.712	2.20978e+06	115270	4.95773				Limited	D3	pH7.6	T.ambient	332.592	35.0994
23	8.0-15C	R1	B1	B2	B	8.0-15C-R1	standard	pH8.0	T.ambient	D3	362.742	163.129	84.5815	29.1947	333.547	4.64749e+06	109359	2.29898				Limited	D3	pH8.0	T.ambient	326.521	34.1814
24	8.0-15C	R1	B1	B2	B	8.0-15C-R1	standard	pH8.0	T.ambient	D3	310.039	144.386	102.846	24.9356	285.103	3.11208e+06	138100	4.24901				Limited	D3	pH8.4	T.ambient	323.82	32.4039
25	8.0-15C	R1	B1	B2	B	8.0-15C-R1	standard	pH8.0	T.ambient	D3	344.755	161.947	111.17	39.6475	305.108	4.18984e+06	256562	5.77011				Limited	D3	pH7.6	T.plus3C	357.14	44.7873
26	8.0-15C	R1	B1	B2	B	8.0-15C-R1	standard	pH8.0	T.ambient	D3	299.65	139.288	65.2815	31.9375	267.713	2.71954e+06	71265.6	2.55359				Limited	D3	pH8.0	T.plus3C	366.671	41.1771
27	8.0-15C	R1	B1	B2	B	8.0-15C-R1	standard	pH8.0	T.ambient	D3	351.338	178.683	129.083	30.9375	320.4	5.35622e+06	269913	4.79748				Limited	D3	pH8.4	T.plus3C	358.875	29.9269
28	8.0-15C	R1	B1	B2	B	8.0-15C-R1	standard	pH8.0	T.ambient	D3	257.787	131.973	76.9703	31.9375	225.85	2.05964e+06	99070.9	4.58936				Limited	D4	pH7.6	T.ambient	507.887	57.5359
29	8.0-15C	R1	B1	B2	B	8.0-15C-R1	standard	pH8.0	T.ambient	D3	288.526	102.096	40.2595	26.166	262.36	1.43191e+06	22206.1	1.52712				Limited	D4	pH8.0	T.ambient	481.059	66.7549
30	8.0-15C	R1	B1	B2	B	8.0-15C-R1	standard	pH8.0	T.ambient	D3	333.602	164.515	122.986	41.1181	292.484	4.14488e+06	325642	7.28421				Limited	D4	pH8.4	T.ambient	497.512	56.337
31	8.0-15C	R1	B1	B2	B	8.0-15C-R1	standard	pH8.0	T.ambient	D3	312.535	150.498	97.5111	32.6942	279.841	3.31874e+06	162771	4.6753				Limited	D4	pH7.6	T.plus3C	563.138	52.3905
32	8.0-15C	R1	B1	B2	B	8.0-15C-R1	standard	pH8.0	T.ambient	D3	286.115	109.938	53.1271	26.4317	259.683	1.64339e+06	39062.1	2.32174				Limited	D4	pH8.0	T.plus3C	540.299	56.5675
33	8.0-15C	R1	B1	B2	B	8.0-15C-R1	standard	pH8.0	T.ambient	D3	313.723	173.405	91.2564	24.3688	289.354	4.55567e+06	106257	2.27926				Limited	D4	pH8.4	T.plus3C	534.528	58.4913
34	8.0-15C	R1	B1	B2	B	8.0-15C-R1	standard	pH8.0	T.ambient	D3	286.646	132.475	71.1695	20.6438	266.003	2.4443e+06	54749	2.19079				Limited	D5	pH7.6	T.ambient	702.87	73.6249
35	8.0-15C	R1	B1	B2	B	8.0-15C-R1	standard	pH8.0	T.ambient	D3	310.718	158.942	102.812	40.3462	270.372	3.57634e+06	223301	5.87689				Limited	D5	pH8.0	T.ambient	688.948	83.645
36	8.0-15C	R1	B1	B2	B	8.0-15C-R1	standard	pH8.0	T.ambient	D3	287.733	142.339	98.6862	27.5955	260.137	2.75963e+06	140718	4.85177				Limited	D5	pH8.4	T.ambient	711.891	82.4091
37	8.0-15C	R1	B1	B2	B	8.0-15C-R1	standard	pH8.0	T.ambient	D4	701.391	301.264	323.284	125.91	575.481	2.73479e+07	6.89014e+06	20.1242				Limited	D5	pH7.6	T.plus3C	810.65	84.1696
38	8.0-15C	R1	B1	B2	B	8.0-15C-R1	standard	pH8.0	T.ambient	D4	571.953	274.945	280.476	157.493	414.46	1.64049e+07	6.48711e+06	28.3378				Limited	D5	pH8.0	T.plus3C	772.59	99.2617
39	8.0-15C	R1	B1	B2	B	8.0-15C-R1	standard	pH8.0	T.ambient	D4	556.211	222.689	229.252	89.3289	466.882	1.21228e+07	2.45819e+06	16.8588				Limited	D5	pH8.4	T.plus3C	772.393	88.2552
40	8.0-15C	R1	B1	B2	B	8.0-15C-R1	standard	pH8.0	T.ambient	D4	418.231	193.551	124.925	36.1442	382.087	7.49466e+06	295349	3.79138
41	8.0-15C	R1	B1	B2	B	8.0-15C-R1	standard	pH8.0	T.ambient	D4	665.472	313.582	304.875	136.344	529.128	2.72434e+07	6.6356e+06	19.5862				Crushed	D3	pH7.6	T.ambient	313.46	35.5158
42	8.0-15C	R1	B1	B2	B	8.0-15C-R1	standard	pH8.0	T.ambient	D4	610.763	284.352	263.369	77.4751	533.288	2.25773e+07	2.81377e+06	11.0817				Crushed	D3	pH8.0	T.ambient	296.981	34.2421
43	8.0-15C	R1	B1	B2	B	8.0-15C-R1	standard	pH8.0	T.ambient	D4	503.589	255.475	183.773	61.1773	442.411	1.51189e+07	1.08181e+06	6.67753				Crushed	D3	pH8.4	T.ambient	278.808	40.1699
[truncated: 6,945 more rows]

## Sheet: Synthesis GT MW fitness
Reference#	Replicate	Motor	Experiment	Code	GT (hours)	MW (hours)	Fecundity	pH	Temp (C)	rmax (d-1)			Reference#	Replicate	pH	Temp	Code	Juvenile Development (%)	Fertilization (%)	Total Abnormal (%)			Condition (pH-temp)		GT (hours)				MW (hours)				rmax (d-1)				Fertilization (%)				Juvenile Development (%)
[truncated: 60 more rows]
