# Supplementary material for: Increased fitness of a key appendicularian zooplankton species under warmer, acidified seawater conditions
Source: PLOS journal article supplement (doi:10.1371/journal.pone.0190625), 2018-01-03
Supplement: S4 (10.1371/journal.pone.0190625.s004) [file journal.pone.0190625.s004]

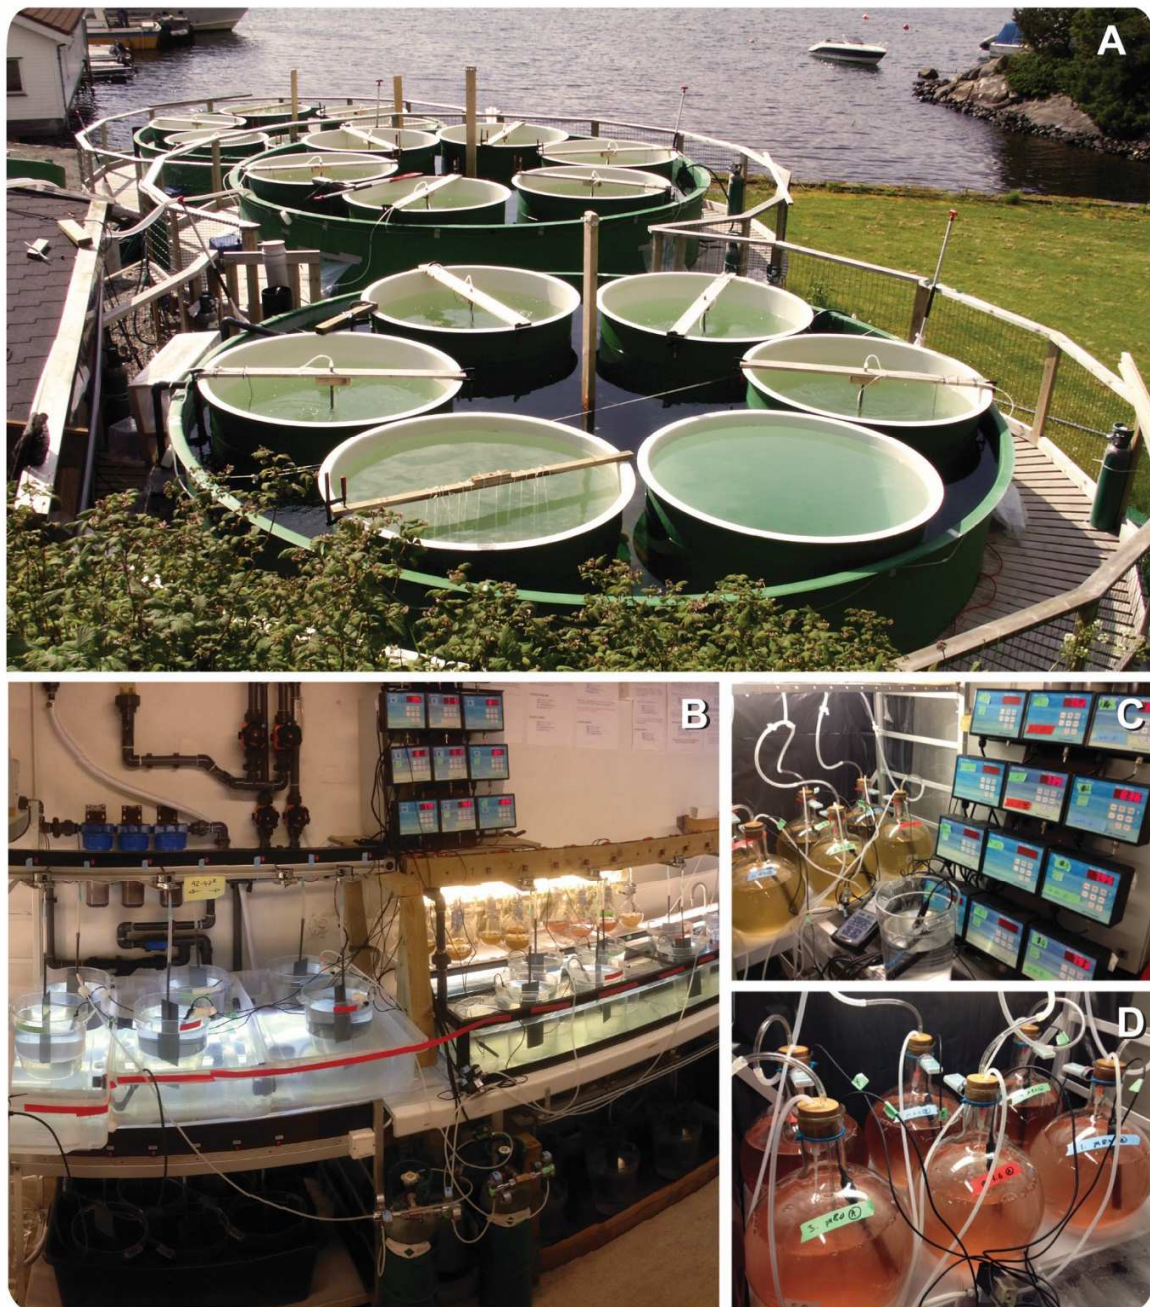

**S1 Fig. Experimental approaches.** A) Mesocosms contained within multiple 2500 L fiberglass tanks placed in larger 25000 L tanks for temperature regulation. B) Microcosms (laboratory scale) using 7 L beakers subject to temperature control in large aquaria. C) pH control system. D) Algal culture in 1 L glass flasks, at room temperature, where pH conditions were manipulated as in (C).
