# Supplementary material for: Increased fitness of a key appendicularian zooplankton species under warmer, acidified seawater conditions
Source: PLOS journal article supplement (doi:10.1371/journal.pone.0190625), 2018-01-03
Supplement: S5 (10.1371/journal.pone.0190625.s005) [file journal.pone.0190625.s005]

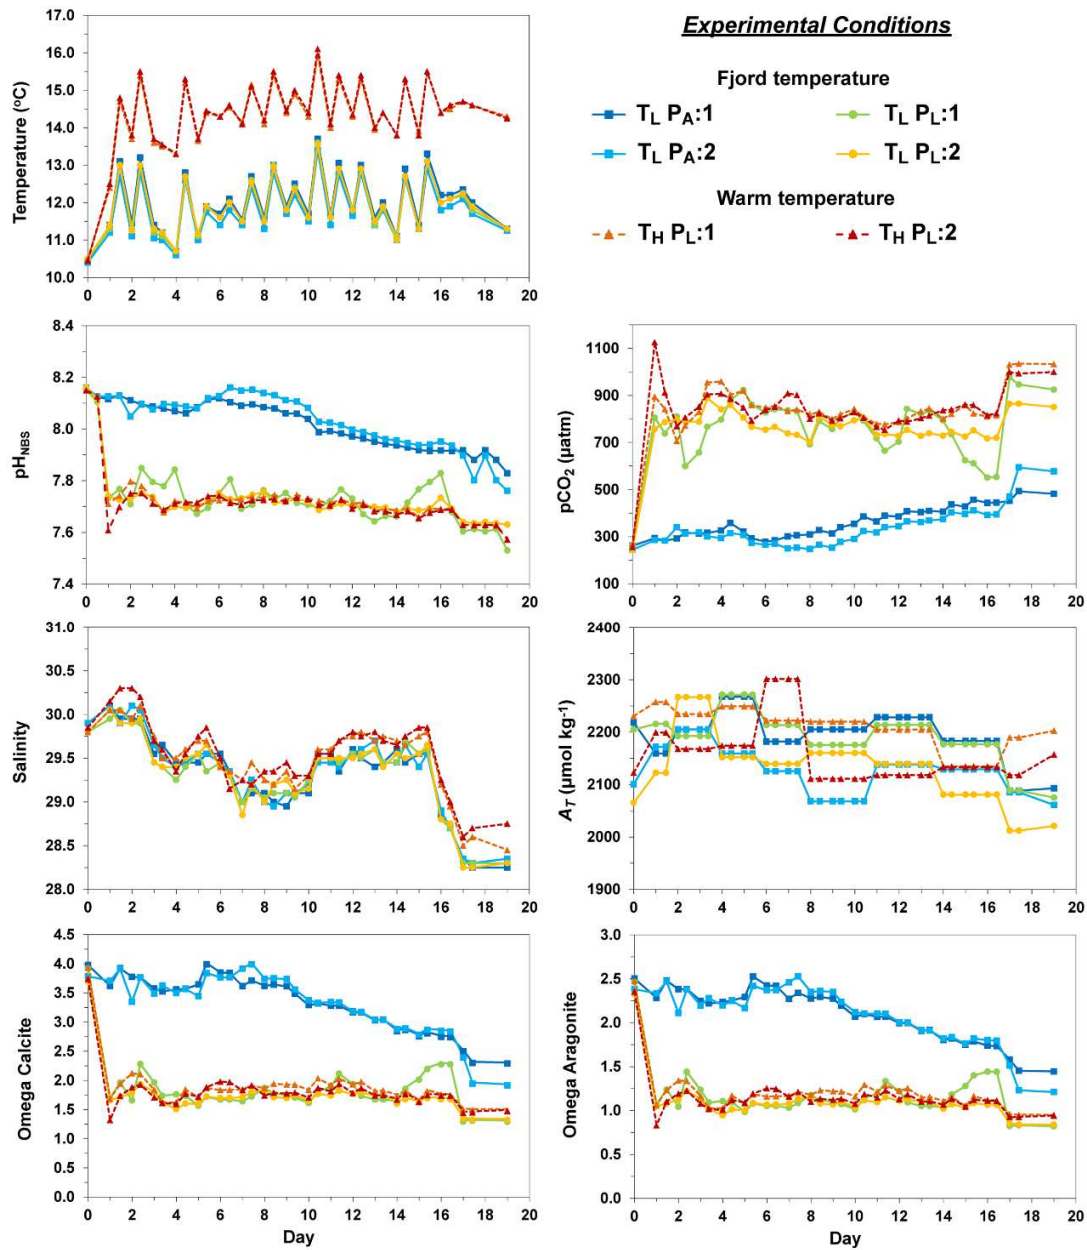

**S2 Fig. Physical and chemical parameters in all treatments throughout the mesocosm experiment.** Salinity, temperature and pH<sub>NBS</sub> were measured with a WTW multi-parameter analyzer Multi 3320 equipped with a TetraCon® 925 conductivity probe (301701) and a pH probe Sentix® (103780), calibrated with National Bureau of Standards (NBS) buffers (Hamilton calibration buffer). Total alkalinity ( $A_T$ ) was determined on filtered samples with a TitroLine Alpha Plus titration system (SI Analytics).  $pCO_2$  was calculated (CO2CALC [29]) from temperature, pH and alkalinity with dissociation constants [30] refitted by Dickson and Millero [31]. Treatment nomenclature is as defined in Fig.1:  $T_L$ , low temperature (the ambient fjord temperature);  $T_H$ , high temperature (+3 °C over ambient);  $P_A$ , ambient pH (8.0);  $P_L$  low pH (7.6), in 2 replicates (:1, and :2).
