# Supplementary material for: Increased fitness of a key appendicularian zooplankton species under warmer, acidified seawater conditions
Source: PLOS journal article supplement (doi:10.1371/journal.pone.0190625), 2018-01-03
Supplement: S7 (10.1371/journal.pone.0190625.s007) [file journal.pone.0190625.s007]

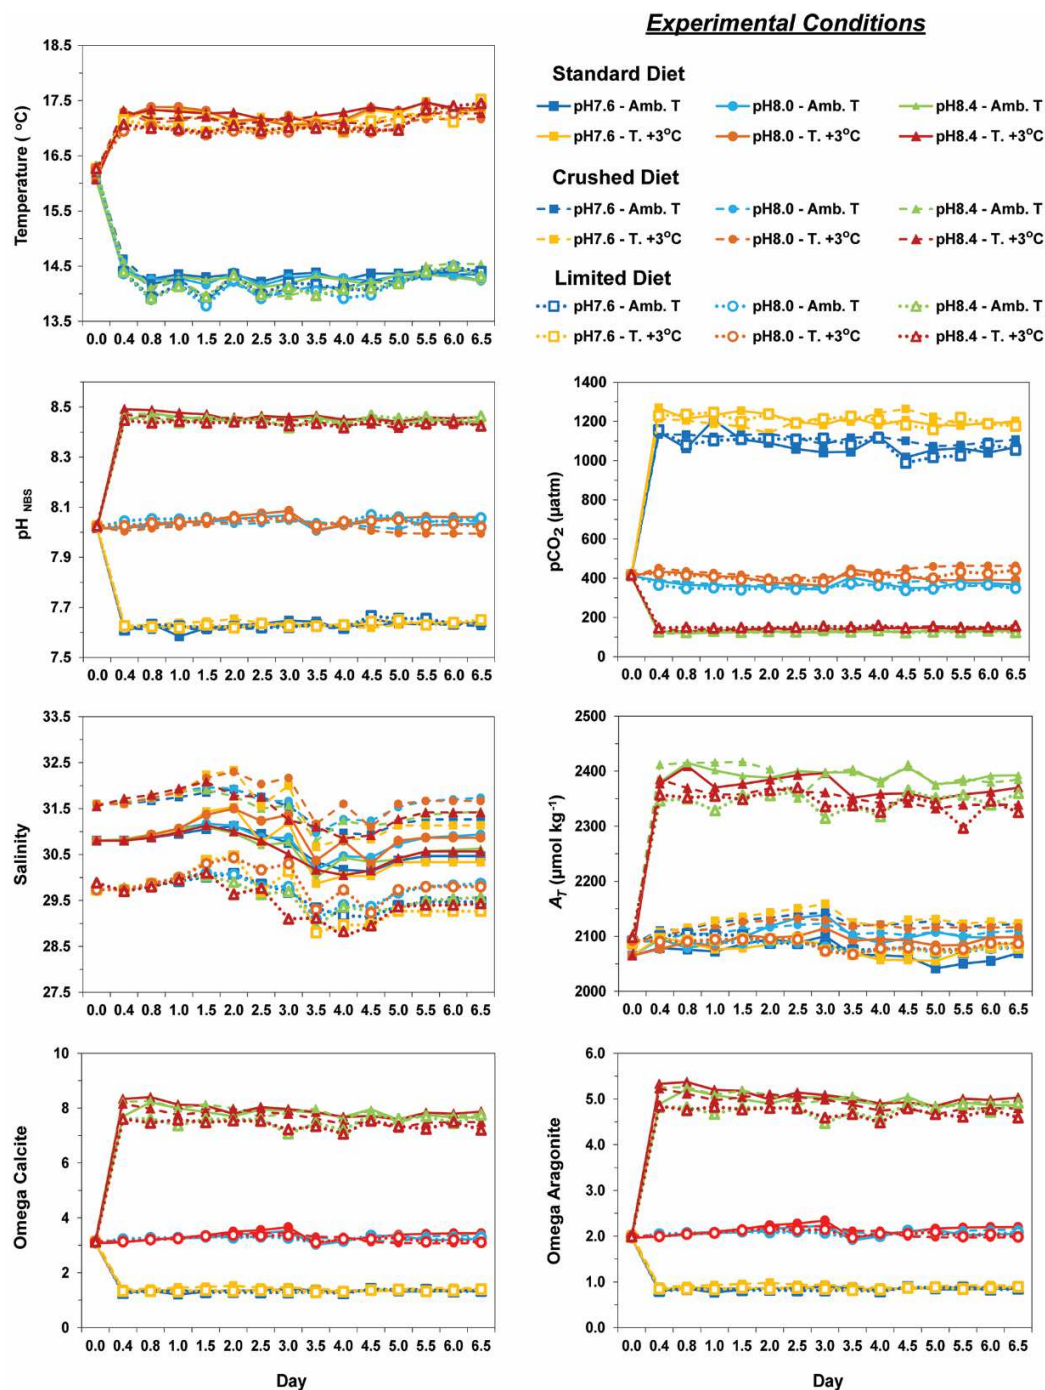

**S4 Fig. Physicochemical parameter monitoring in all treatments and replicates during microcosm experiments.** Salinity, temperature and pH<sub>NBS</sub> were measured with a WTW multi parameters analyzer model Multi 3320 equipped with a TetraCon® 925 conductivity probe (301701) and a pH probe Sentix® (103780), calibrated with National Bureau of Standards (NBS) buffers (Hamilton calibration buffer). The total alkalinity (A<sub>T</sub>) was determined on filtered samples with a TitroLine Alpha Plus titration system (SI Analytics). pCO<sub>2</sub> was calculated (CO2CALC [29]) from temperature, pH and alkalinity with dissociation constants [30] refitted by Dickson and Millero [31].
